# Supplementary material for: Automatic Detection of Concrete Spalling Using Piecewise Linear Stochastic Gradient Descent Logistic Regression and Image Texture Analysis
Source: Hindawi journal article supplement (doi:10.1155/2019/5910625), 2019-01-01
Supplement: f1 [file 5910625.f1.csv]

X1	X2	X3	X4	X5	X6	X7	X8	X9	X10	X11	X12	X13	X14	X15	X16	X17	X18	X19	X20	X21	X22	X23	X24	X25	X26	X27	X28	X29	X30	X31	X32	X33	X34	X35	X36	X37	X38	X39	X40	X41	X42	X43	X44	X45	X46	X47	X48	X49	X50
0.848737352	0.358926575	542.3725929	5431.087713	0.8049	5.79E-05	17078.90819	4.92E-05	14484.40303	2.07E-05	6152.606286	0.86111829	75.04578564	560.317609	6056.740086	0.8649	0.023065033	16687.78576	0.000427946	14697.22973	74.79467275	4325.114233	0.84221734	0.402313301	539.350264	5278.227558	0.7954	5.79E-05	17085.09832	4.88E-05	14382.82589	2.33E-05	6873.357053	0.866778854	74.58262468	564.4909216	6186.57527	0.8702	0.022924895	16693.24535	0.000425961	14795.72871	74.33913148	4175.8282	134.3793	130.5332	122.5217	4.311963765	4.286058534	4.824160975
0.85984479	0.341502267	418.6132827	5667.272516	0.8161	6.47E-05	15339.9277	5.56E-05	13202.29678	2.22E-05	5202.171548	0.866195386	74.34303391	436.5286434	6192.721357	0.8728	0.022863392	14986.2209	0.000430615	13286.41615	74.11768195	3428.413153	0.847146411	0.383962028	413.4451661	5380.58656	0.8006	6.47E-05	15337.72446	5.48E-05	13001.9041	2.50E-05	5845.354234	0.864990548	74.47251234	433.4717089	6162.632733	0.8713	0.022902659	14982.34684	0.000431204	13264.19237	74.24528044	3469.584299	127.5251	123.54	115.1395	5.351707203	5.65641229	5.871085057
0.842402215	0.383786493	588.5090841	5298.836111	0.7981	5.72E-05	17298.12104	4.82E-05	14570.43111	2.19E-05	6636.327277	0.867568427	74.36649095	615.4767362	6215.378868	0.8726	0.022861299	16895.16216	0.000424348	14987.71642	74.13466822	4031.392734	0.840186434	0.399546257	583.3029997	5237.287623	0.7934	5.72E-05	17295.35203	4.81E-05	14524.19016	2.29E-05	6899.862995	0.861841678	74.95657697	616.1890519	6075.167687	0.8659	0.023037712	16902.34981	0.000426869	14903.06689	74.70829459	4294.011895	134.9324	131.3556	123.786	4.125121845	4.05227697	4.324350125
0.849474898	0.407546227	487.7868566	5412.574213	0.8004	6.11E-05	16190.98151	5.19E-05	13762.85858	2.51E-05	6550.852699	0.864163338	74.78108077	509.4159465	6127.128356	0.8679	0.022988667	15807.24865	0.000429589	13975.39347	74.53613668	3953.934094	0.847719641	0.384115884	489.6838162	5389.927073	0.8008	6.11E-05	16184.71154	5.18E-05	13725.07666	2.36E-05	6186.536339	0.861115051	74.99145003	510.5956095	6060.321086	0.8655	0.023052181	15822.02865	0.000430343	13952.12659	74.74282295	3989.688388	130.7565	126.6309	119.8347	4.438559198	4.563624129	4.722517963
0.867894887	0.320407174	354.0661658	5851.160931	0.8252	6.10E-05	16292.35931	5.30E-05	14138.50239	1.95E-05	5217.758362	0.876759569	73.27903299	369.833258	6458.188884	0.8852	0.022540441	15930.69318	0.000422866	14284.08268	73.07942928	3248.141324	0.859315659	0.340029397	353.0823126	5661.404459	0.8164	6.10E-05	16293.21889	5.25E-05	13997.94016	2.08E-05	5532.83807	0.875427459	73.59142468	366.8477768	6411.606171	0.8816	0.022632271	15920.99036	0.000424349	14249.41681	73.37784875	3487.377495	130.9913	127.6541	119.1264	6.087924467	6.468929833	6.913785001
0.855803493	0.358164776	463.4378392	5572.388752	0.8108	5.64E-05	17561.9815	4.83E-05	15028.96127	2.02E-05	6298.617785	0.864684799	74.69981584	477.554558	6141.740331	0.8688	0.022960277	17159.63191	0.000425127	15179.21883	74.45892239	4240.11913	0.844272605	0.410108122	451.7742017	5306.514961	0.7954	5.64E-05	17561.75861	4.76E-05	14829.76812	2.30E-05	7231.956626	0.865269735	74.41422018	477.3477064	6171.761468	0.872	0.02287622	17163.36032	0.000423774	15191.58798	74.18567802	4013.729702	136.3504	131.8219	124.8213	4.685426324	5.070244608	5.546815871
0.848665841	0.393803098	579.4532734	5400.922539	0.8004	5.80E-05	17068.17879	4.92E-05	14485.00256	2.29E-05	6704.226012	0.865440087	74.75812025	601.2720571	6151.144897	0.8682	0.022977689	16669.85499	0.000426851	14754.38043	74.51038063	4231.104008	0.83947216	0.395870058	573.4437169	5233.064467	0.7942	5.80E-05	17066.61043	4.87E-05	14326.42618	2.30E-05	6746.30899	0.85831778	75.32656377	594.471974	5989.941627	0.8617	0.023150573	16667.62783	0.000429262	14636.23763	75.0724297	4344.832888	134.1281	130.0175	124.2379	4.507403952	4.677349009	5.081545394
0.847402778	0.392629606	829.5863835	5383.889194	0.8005	5.39E-05	18315.72517	4.57E-05	15521.31755	2.12E-05	7174.938663	0.851691343	75.88088837	848.9223846	5843.4173	0.8555	0.023313896	17887.04804	0.000428102	15591.16936	75.61649583	4843.688136	0.828966473	0.47728735	806.2621284	4985.390683	0.7771	5.39E-05	18316.38309	4.47E-05	15186.4831	2.57E-05	8733.364947	0.861773894	74.9528814	858.2832891	6074.068946	0.8659	0.023034527	17892.72006	0.000424057	15775.19835	74.70829359	4473.659891	138.3291	135.1999	129.992	2.809660689	2.698655219	2.862330519
0.858004679	0.339062116	568.7331205	5629.789836	0.8146	5.19E-05	19048.96366	4.46E-05	16337.47773	1.75E-05	6498.311564	0.872784173	73.75784447	592.2935425	6351.341519	0.8796	0.022674658	18624.00296	0.000417049	16619.13331	73.54469042	4076.472033	0.843814121	0.428067079	552.3604842	5285.585298	0.7931	5.19E-05	19060.68352	4.38E-05	16082.73724	2.22E-05	8164.475728	0.864772231	74.42853866	587.0016059	6162.337233	0.8718	0.022877055	18623.84652	0.000419945	16472.11623	74.2026958	4311.492544	140.8614	137.9966	132.0504	4.096363026	4.026361688	4.720599521
0.854473484	0.395949807	693.6949932	5514.605914	0.8049	5.72E-05	17279.56181	4.89E-05	14766.98736	2.26E-05	6846.250963	0.86263716	74.82981667	723.9576848	6097.455667	0.8673	0.023000642	16881.89219	0.000426328	14898.02884	74.58769976	4183.031246	0.839430624	0.424737309	687.8175718	5204.640967	0.7899	5.71E-05	17288.18787	4.79E-05	14519.68633	2.43E-05	7327.5307	0.857854604	75.50220982	710.3668295	5970.42475	0.8598	0.023200769	16881.1662	0.00042933	14819.89	75.23832633	4556.317283	134.3445	131.3065	125.9715	3.502230682	3.701696604	3.90188259
0.85975682	0.344535754	473.0539679	5660.691402	0.8153	5.85E-05	16978.95719	5.03E-05	14601.88651	2.02E-05	5819.35349	0.862832735	74.89429956	485.8520655	6096.329102	0.8666	0.023020437	16583.97231	0.000427742	14642.82491	74.64794886	4181.184976	0.854258827	0.379412858	470.9811718	5526.809736	0.8073	5.85E-05	16972.01846	5.00E-05	14498.85544	2.22E-05	6433.224328	0.863899449	74.87978772	484.1677434	6115.878865	0.8668	0.023015181	16573.18193	0.000427776	14645.76082	74.63072512	4252.741117	133.732	129.7433	123.1431	5.713665724	5.430985648	6.515536999
0.851990491	0.378334781	548.8446457	5484.469413	0.8059	5.95E-05	16606.66919	5.07E-05	14150.74486	2.27E-05	6223.411714	0.86349402	75.01479256	561.8854732	6099.817751	0.8653	0.023055999	16221.81995	0.000429296	14333.22259	74.76009849	4197.712701	0.836542104	0.440020354	531.5518382	5141.293347	0.7861	5.96E-05	16605.67956	4.98E-05	13897.35057	2.63E-05	7271.77929	0.863497692	74.80405717	564.230521	6113.953435	0.8676	0.022995024	16225.8897	0.000428265	14340.9897	74.56190939	3996.261987	132.32	128.261	122.1628	4.145889531	4.237555781	4.817208337
0.850227378	0.390155763	814.2034891	5436.917009	0.8025	5.84E-05	16893.8152	4.96E-05	14370.01845	2.29E-05	6565.733956	0.862335909	74.92058178	844.9706799	6086.007503	0.8663	0.023028328	16502.43357	0.000427787	14563.98467	74.6737995	4158.141291	0.834972666	0.437372709	803.459776	5116.892057	0.7856	5.84E-05	16887.04786	4.88E-05	14101.10837	2.56E-05	7372.730652	0.858419286	75.26136364	841.9005102	5996.009045	0.8624	0.023132214	16497.64506	0.000429283	14492.34346	75.0114942	4213.215793	132.7198	129.8804	124.832	2.786662513	2.778362079	2.749068206
0.856261334	0.359467456	409.6323964	5582.008876	0.8112	5.87E-05	16887.77318	5.03E-05	14471.3776	2.13E-05	6028.250493	0.869086461	74.15862857	422.3712	6256.6448	0.875	0.022800286	16500.93657	0.000424718	14678.91318	73.93132774	3807.422286	0.849003121	0.376322669	398.9509523	5424.494336	0.8033	5.89E-05	16860.9888	5.00E-05	14308.07407	2.21E-05	6358.091	0.866710722	74.44522198	421.1713892	6194.725594	0.8717	0.022886403	16492.36262	0.000426033	14627.22519	74.2112103	3939.634393	133.9157	129.1326	121.5964	5.465052013	5.534764425	6.470325111
0.854281985	0.350271337	763.7543167	5550.185249	0.8108	5.40E-05	18278.78984	4.61E-05	15619.77456	1.90E-05	6382.383448	0.861325292	75.07055286	779.6153134	6058.422392	0.8646	0.023069188	17860.95304	0.000424675	15746.55862	74.82062423	4549.794934	0.839058839	0.418807746	744.2061764	5200.643336	0.7901	5.40E-05	18275.2306	4.53E-05	15335.92669	2.26E-05	7642.853057	0.857684934	75.28766964	777.7272938	5982.123304	0.8621	0.023135963	17848.35541	0.000425628	15661.81932	75.03759615	4569.966477	138.1787	135.2005	128.0963	3.019166493	3.07143285	3.087397984
0.843095721	0.392494038	533.9014686	5298.901343	0.7967	5.79E-05	17115.74683	4.88E-05	14435.56948	2.28E-05	6697.772687	0.863226875	74.90974146	558.4748384	6102.301016	0.8664	0.023025174	16728.21653	0.000427354	14779.50719	74.66518049	4148.549169	0.832749355	0.445494001	525.236916	5073.829206	0.7834	5.79E-05	17111.13569	4.82E-05	14249.93857	2.58E-05	7608.48264	0.856375305	75.68454185	550.1014222	5933.539986	0.8578	0.023255475	16712.37923	0.000430787	14647.29755	75.4137485	4627.320005	133.9273	130.3505	125.0386	4.906976127	5.261829506	5.647841184
0.842835831	0.395880432	754.7068576	5292.327305	0.7962	6.01E-05	16411.09043	5.07E-05	13838.10693	2.39E-05	6476.149083	0.853809481	75.59422315	781.8725833	5896.759609	0.8586	0.023236042	16019.82809	0.000432197	13994.97422	75.34348117	4117.272653	0.83711398	0.431691214	749.7772981	5158.599289	0.7876	6.01E-05	16409.3677	5.03E-05	13740.27032	2.60E-05	7063.36224	0.853665692	75.76867414	778.9418768	5883.327498	0.8568	0.023284702	16027.08777	0.000432941	14005.90068	75.50176677	4372.897176	131.3709	127.6937	122.3485	3.009174835	3.070941274	3.110088061
0.855443767	0.34309984	561.166441	5576.863843	0.8123	5.53E-05	17908.52444	4.73E-05	15317.5497	1.89E-05	6154.948664	0.868523082	74.28067766	579.9473443	6238.248626	0.8736	0.022833361	17492.10085	0.000422357	15530.39082	74.04980665	4152.090774	0.848717302	0.376432486	552.6768809	5417.381166	0.8028	5.53E-05	17901.24402	4.70E-05	15184.34472	2.07E-05	6760.942576	0.865179881	74.42899748	579.7538426	6169.004588	0.8718	0.022880364	17499.34205	0.000422899	15484.50885	74.20269657	4064.027988	137.0924	133.5694	126.543	4.485940508	4.658259722	4.990626313
0.853531556	0.369449598	657.8185529	5524.398145	0.8085	5.65E-05	17510.56759	4.82E-05	14950.71638	2.10E-05	6431.633643	0.866012852	74.59632184	681.2195402	6172.127356	0.87	0.022928785	17105.73034	0.000424752	15159.36383	74.35622047	4200.255057	0.838630715	0.421952146	641.9732878	5193.970249	0.7899	5.65E-05	17515.24661	4.73E-05	14699.83061	2.40E-05	7353.42575	0.856429563	75.59082441	668.402422	5940.645785	0.8588	0.023227091	17094.77131	0.00042915	14979.9209	75.32593487	4632.04483	135.4111	131.9511	126.8657	4.082266134	4.480369269	4.734645025
0.853544446	0.355237154	388.5234684	5531.719862	0.8096	6.04E-05	16458.24815	5.15E-05	14061.71589	2.17E-05	5773.202816	0.870014035	74.44167909	402.1875215	6254.172153	0.8719	0.022882739	16072.92729	0.000427529	14313.2165	74.19418869	4039.860993	0.834951074	0.436028008	376.5111394	5116.568428	0.7855	6.04E-05	16460.22521	5.03E-05	13757.64616	2.66E-05	7086.862126	0.854956375	75.66107226	397.7317016	5911.550583	0.858	0.02325248	16062.77552	0.000432708	14058.93338	75.39616997	4321.415035	131.4005	127.7052	122.0004	5.611105038	6.158286528	6.879491249
0.857873005	0.334968723	538.562615	5632.493683	0.8153	5.48E-05	18067.22826	4.70E-05	15495.08057	1.83E-05	6076.087575	0.87129276	74.10334589	554.9088729	6300.248601	0.8757	0.02277819	17661.63629	0.000421096	15738.71038	73.87222911	4190.752883	0.858888476	0.369302784	531.2293668	5625.081054	0.8118	5.48E-05	18064.43853	4.71E-05	15509.73252	2.01E-05	6713.77556	0.871936021	73.82726445	554.4995448	6331.124716	0.8788	0.022698081	17647.69117	0.000419897	15724.16368	73.61164119	3928.514793	137.6392	134.1058	128.098	4.400298099	4.39679501	4.637563584
0.857768654	0.35022758	567.2273342	5615.202977	0.8129	5.44E-05	18174.65125	4.67E-05	15586.4749	1.90E-05	6378.793333	0.86889253	74.26504921	583.836347	6245.895628	0.8738	0.022827292	17759.11467	0.000421509	15780.53118	74.03285761	4241.179103	0.860544908	0.37187846	562.1900603	5657.203223	0.8129	5.45E-05	18167.37422	4.69E-05	15628.12606	2.01E-05	6806.273588	0.872572674	73.75048312	587.8953052	6348.031943	0.8797	0.022674566	17759.65738	0.000419219	15842.11474	73.53633079	3909.805729	137.983	134.5107	128.5187	4.257054263	4.255383121	4.453431296
0.851536073	0.352046494	682.9423767	5496.628045	0.8087	5.25E-05	18811.11438	4.47E-05	16018.38189	1.85E-05	6624.489551	0.862881613	74.86780482	703.6503634	6099.003922	0.8669	0.023006689	18373.85823	0.000422519	16215.90605	74.6221146	4633.359096	0.856080358	0.366757224	686.8984935	5569.966164	0.8098	5.25E-05	18811.46592	4.50E-05	16103.0975	1.93E-05	6895.045443	0.866579432	74.41880734	708.8041284	6194.288532	0.872	0.022872428	18380.41135	0.000420489	16291.96902	74.18567736	4389.638303	140.0622	137.063	130.8702	3.351974218	3.386064234	3.427995327
0.859540618	0.335209889	630.0245992	5669.578142	0.8171	5.16E-05	19142.25566	4.44E-05	16458.5465	1.74E-05	6388.046384	0.871011202	73.93140383	651.5059253	6307.013218	0.8776	0.022725974	18698.38138	0.000417579	16657.13999	73.71229481	4194.747607	0.858220016	0.381081749	622.2642628	5601.909607	0.8098	5.17E-05	19124.58558	4.44E-05	16407.81505	1.96E-05	7310.878242	0.867440078	74.19634077	647.851458	6224.995655	0.8745	0.022806363	18692.74763	0.000418736	16581.34586	73.9735964	4265.382962	141.5091	138.1057	131.4033	3.676944001	3.700071284	3.712121915
0.855969062	0.346286276	757.2899656	5591.143384	0.8132	5.35E-05	18473.40002	4.58E-05	15815.96395	1.85E-05	6385.287752	0.870876832	73.85724044	785.5612477	6309.827869	0.8784	0.022707081	18051.51116	0.000418794	16079.44315	73.64516161	3915.650842	0.860881197	0.346578366	757.5472161	5678.618102	0.8154	5.35E-05	18468.39146	4.60E-05	15898.91613	1.85E-05	6399.83505	0.873322018	73.72795455	781.6525	6363.165455	0.88	0.0226659	18050.08205	0.000418257	16122.19482	73.51126156	4008.470341	138.5875	135.8623	130.0657	3.175617066	3.04196297	3.333854152
0.864748101	0.324008757	677.0498662	5782.251764	0.8222	5.01E-05	19730.26867	4.33E-05	17064.68727	1.63E-05	6376.105449	0.87225043	73.72849187	699.396636	6343.662121	0.8799	0.022665178	19280.50142	0.000415303	17200.99979	73.51961496	4119.03239	0.856091497	0.347029155	670.3829499	5590.50695	0.8129	5.01E-05	19723.48616	4.29E-05	16884.44575	1.74E-05	6848.949809	0.869566864	74.12852736	695.0881983	6267.458357	0.8753	0.022784029	19278.12693	0.000417123	17147.67199	73.90598624	4388.152062	143.407	140.3414	134.335	3.597381131	3.436953017	3.647242109
0.861095849	0.33015873	596.5953602	5705.192186	0.819	5.87E-05	16842.96899	5.05E-05	14507.96769	1.94E-05	5553.681074	0.872275275	73.72871917	614.4262984	6344.109217	0.8799	0.022673553	16462.38584	0.000422767	14689.65287	73.5196168	3509.646664	0.860139212	0.343217743	591.1178777	5671.86411	0.8161	5.87E-05	16847.90908	5.04E-05	14500.459	2.02E-05	5768.336233	0.876372183	73.41145185	616.5100147	6441.576666	0.8837	0.0225763	16465.92158	0.000421398	14761.81837	73.20347495	3489.777639	132.265	129.9592	123.437	3.890292405	3.853872774	3.888474122
0.866582566	0.319985439	620.0268171	5823.227642	0.8241	5.43E-05	18198.97901	4.71E-05	15770.91143	1.74E-05	5817.13809	0.8828849	72.61083744	645.6983878	6621.460143	0.8932	0.02233256	17791.48712	0.000414036	16057.91164	72.42488693	3386.090237	0.864441448	0.334470574	618.9958572	5767.641404	0.8207	5.43E-05	18202.42915	4.69E-05	15737.59895	1.82E-05	6078.833313	0.875944876	73.40783071	639.1192712	6433.979065	0.8837	0.022572039	17793.147	0.000417562	15942.32924	73.20347382	3714.260835	137.5624	135.0289	128.2936	3.773341522	3.810625249	4.148927457
0.860680741	0.333659372	619.8683213	5691.908669	0.8179	5.56E-05	17790.22961	4.78E-05	15311.62604	1.85E-05	5946.78995	0.870363908	74.06289236	639.9855039	6286.218811	0.8761	0.022768583	17389.0678	0.000421554	15480.53448	73.83850121	3992.293117	0.85469716	0.360256885	612.6751883	5549.112634	0.8097	5.55E-05	17796.53131	4.75E-05	15213.09376	2.00E-05	6400.216006	0.864427802	74.71014159	633.2424312	6136.542074	0.8687	0.022962072	17383.04662	0.000424416	15371.247	74.46749359	4322.907908	136.7551	132.9358	126.4076	3.6157605	3.849139951	3.745191883
0.867105652	0.303044949	592.4949251	5854.587965	0.8276	5.22E-05	18936.82455	4.53E-05	16423.01069	1.58E-05	5738.877235	0.873244622	74.00923709	604.649675	6342.061695	0.8769	0.02274463	18508.02018	0.000418479	16534.20426	73.77113797	4513.972061	0.861469359	0.362340216	586.1044739	5676.136431	0.8136	5.23E-05	18931.05937	4.50E-05	16306.01497	1.89E-05	6864.145403	0.869917085	74.12542838	604.7253827	6273.857437	0.8754	0.022783523	18503.39353	0.000418962	16463.4226	73.89754444	4318.301919	140.6304	137.4196	131.0496	4.13344842	4.079207747	4.307544526
0.864230175	0.314473045	672.9577465	5783.693298	0.8236	5.17E-05	19134.21442	4.46E-05	16545.02551	1.63E-05	5990.278533	0.870729203	74.15872472	689.4730888	6286.091761	0.8751	0.022790758	18689.75763	0.000418627	16648.29283	73.92287813	4512.247629	0.859416274	0.369640217	668.5712173	5631.733859	0.8116	5.17E-05	19123.29707	4.44E-05	16435.49981	1.91E-05	7060.63344	0.870258705	74.07123288	690.280137	6283.771005	0.876	0.02276741	18685.09418	0.000418244	16630.1756	73.84692938	4295.040753	141.369	138.0468	131.709	3.583327922	3.472752476	3.597404481
0.864671266	0.329033828	542.4239474	5778.552933	0.8218	5.76E-05	17162.29654	4.98E-05	14842.93641	1.90E-05	5630.446946	0.874182562	73.57956221	559.4915504	6389.34252	0.8817	0.022626379	16772.35522	0.000421229	14996.26309	73.36952556	3598.138369	0.854774789	0.369903632	535.2856437	5548.401779	0.8094	5.76E-05	17166.18903	4.92E-05	14677.93994	2.14E-05	6316.111193	0.872186403	73.81069397	555.439818	6336.721729	0.879	0.022695703	16771.64846	0.00042225	14963.73586	73.59489298	3700.318544	133.9799	130.9675	123.7283	4.277791018	4.293651564	4.504118017
0.861273828	0.325930445	656.8450275	5711.300915	0.8195	5.82E-05	16974.89725	5.01E-05	14625.14122	1.90E-05	5521.796461	0.872439762	73.75693497	679.4404275	6345.103229	0.8796	0.022680826	16582.446	0.00042253	14793.96311	73.54469174	3602.94975	0.863192824	0.340578825	655.3976065	5736.634632	0.8189	5.82E-05	16967.20186	5.03E-05	14645.0142	1.98E-05	5781.035413	0.87156838	73.82453345	677.0263996	6324.581702	0.8788	0.022701415	16583.81384	0.000422812	14781.57889	73.61164188	3611.325558	133.3429	130.0865	123.5302	3.570983001	3.641430728	3.838109946
0.873269911	0.29310138	562.7612478	5991.407678	0.8335	5.56E-05	17776.95873	4.86E-05	15524.91794	1.63E-05	5210.974805	0.880516032	72.86743063	578.206606	6557.975396	0.8901	0.022411417	17384.41467	0.000416308	15654.38428	72.67712555	3371.332996	0.872191132	0.308368453	560.3601445	5954.273931	0.8305	5.56E-05	17779.2891	4.85E-05	15509.25647	1.72E-05	5478.471042	0.883673099	72.6324748	577.2992161	6635.036282	0.893	0.02233884	17378.78735	0.000415324	15700.35258	72.44110805	3406.707167	136.1772	133.2268	126.9988	4.128849738	4.177291199	4.305693737
0.860619295	0.362343712	641.2809512	5677.076244	0.8158	5.89E-05	16785.46433	5.06E-05	14452.10802	2.14E-05	6044.327164	0.868274867	73.99064781	666.2682482	6254.057938	0.8768	0.022753688	16402.60413	0.000423996	14572.58112	73.77955171	3527.083714	0.857335461	0.352622507	638.9810392	5604.224329	0.8122	5.89E-05	16781.74317	5.05E-05	14391.73955	2.08E-05	5896.774809	0.870517331	74.13561065	658.5788872	6283.99623	0.8753	0.022792568	16406.02251	0.000424749	14616.32827	73.90598869	3828.262767	132.4581	129.5003	122.3523	3.744415093	3.580977508	3.698997798
0.863916373	0.318342044	559.8146347	5773.149265	0.8227	5.75E-05	17202.94676	4.96E-05	14872.87641	1.83E-05	5462.506868	0.877273297	73.23958451	577.5633962	6470.456249	0.8857	0.022524301	16814.64875	0.000419579	15090.17964	73.03817355	3443.543073	0.863626227	0.342037828	554.5621721	5747.443441	0.8195	5.75E-05	17207.78304	4.96E-05	14871.68527	1.98E-05	5844.121904	0.87425557	73.5590203	573.4041275	6392.208073	0.8819	0.02262113	16806.61107	0.000421025	15030.14959	73.35288632	3543.377934	134.1982	131.0277	124.0826	4.102038123	4.192771483	4.324508902
0.867305616	0.318148776	653.9299733	5843.213715	0.8254	5.14E-05	19224.01175	4.46E-05	16675.26571	1.64E-05	6099.060092	0.875070494	73.655466	670.1579067	6400.31184	0.8809	0.022640817	18779.15518	0.000416207	16803.41018	73.43615607	4233.87229	0.857549603	0.353694581	646.4504926	5606.130788	0.812	5.14E-05	19212.4803	4.41E-05	16472.25557	1.81E-05	6817.869089	0.875576923	73.43445778	669.3694815	6425.239529	0.8834	0.022576887	18781.94057	0.000415184	16813.43938	73.22833296	3968.448042	141.9027	138.3051	131.7873	3.64008691	3.627728489	3.674596401
0.862608483	0.333251983	730.4782184	5731.490787	0.8195	4.90E-05	20173.43941	4.22E-05	17409.62247	1.64E-05	6703.900305	0.866751129	74.44430423	739.5302283	6195.524722	0.8717	0.022876825	19711.52988	0.000417549	17480.97229	74.21120798	4680.856831	0.852559052	0.365213082	708.1808722	5501.374876	0.8072	4.90E-05	20163.93992	4.18E-05	17191.60247	1.79E-05	7367.451933	0.867304342	74.24865545	742.9787161	6218.906854	0.8739	0.022819383	19702.05664	0.000416668	17476.94725	74.02438447	4529.084106	144.8353	141.8357	136.1309	3.231868486	3.314981977	3.470845025
0.861113288	0.351867728	664.0655236	5689.251806	0.8165	5.05E-05	19589.92603	4.35E-05	16869.61855	1.77E-05	6895.268585	0.873906755	73.65622162	690.534287	6378.969573	0.8808	0.022642407	19149.25	0.000415307	17116.01835	73.44449298	4142.366485	0.860363639	0.359793561	661.8488572	5660.206193	0.8138	5.05E-05	19586.93094	4.34E-05	16850.46409	1.81E-05	7055.294667	0.868687965	74.19794168	683.3288736	6246.889994	0.8745	0.02280518	19139.57027	0.000417748	17002.41771	73.97359621	4399.063236	142.7493	139.9229	133.8365	3.616303293	3.451022398	3.707960052
0.866303765	0.290992514	498.8654914	5846.155035	0.8282	5.62E-05	17628.95955	4.86E-05	15277.51603	1.64E-05	5117.907993	0.876427659	73.34075749	512.1945732	6447.60667	0.8845	0.022553492	17228.57117	0.00041889	15442.50305	73.13726412	3580.779763	0.865507251	0.340233804	493.6144666	5787.322698	0.8212	5.62E-05	17617.32099	4.86E-05	15246.46035	1.90E-05	6021.449708	0.874052666	73.62414889	509.1221062	6383.776668	0.8812	0.022637741	17227.67817	0.000420143	15400.86193	73.41115587	3746.555493	136.0087	132.3271	125.9964	4.525530279	4.776139193	4.695421924
0.794286498	0.657740927	715.7030039	4317.232432	0.7357	7.27E-05	13552.21286	5.78E-05	10765.35968	4.77E-05	8931.499388	0.822200292	79.55838433	758.0075887	5166.253366	0.817	0.024428344	13222.81408	0.00045998	11138.94969	79.17983165	5135.704284	0.803940977	0.654911498	721.1367383	4448.558438	0.7401	7.27E-05	13553.69639	5.84E-05	10897.92517	4.75E-05	8886.070531	0.825748832	79.26463415	765.585122	5233.703415	0.82	0.024339245	13222.5411	0.000458791	11183.36337	78.89014915	5078.489756	119.1699	116.3207	110.8337	2.914075152	2.878376541	3.234539273
0.820532612	0.515586279	631.424938	4811.972479	0.7667	7.62E-05	12948.92905	6.25E-05	10624.92354	3.92E-05	6681.38607	0.842345285	77.4250298	664.9346841	5594.10584	0.839	0.023793065	12642.66949	0.000453872	10901.95085	77.10360018	4156.847318	0.830280538	0.489120639	639.1197374	4998.83417	0.7767	7.62E-05	12943.30449	6.33E-05	10741.16532	3.72E-05	6342.697052	0.841059029	77.24524263	668.2616556	5586.022122	0.8408	0.023742307	12640.34229	0.000452966	10880.18375	76.93853429	3970.676023	115.8151	113.7826	109.212	3.714311779	3.321405913	3.74118377
0.801325358	0.63214671	847.1464401	4430.807713	0.7416	7.22E-05	13645.33697	5.78E-05	10933.04811	4.56E-05	8628.658037	0.822497746	79.31193556	891.105443	5185.745668	0.8194	0.024356483	13315.3865	0.000458394	11219.11181	78.94791495	4969.073468	0.798565967	0.648685281	838.7698563	4375.839252	0.7378	7.22E-05	13644.7273	5.77E-05	10895.50906	4.67E-05	8862.1373	0.829690838	78.64875333	905.7037037	5327.791092	0.8262	0.024156617	13316.97833	0.00045563	11316.83126	78.29813708	4794.384653	118.8809	116.7969	112.1473	2.581843371	2.469058604	2.576432167
0.809333813	0.573269563	783.8348612	4589.861698	0.7527	7.17E-05	13732.64315	5.80E-05	11119.17916	4.11E-05	7870.217617	0.823381149	79.25365854	818.2514634	5201.279512	0.82	0.024338316	13396.41476	0.000457823	11300.69442	78.89014805	4985.701463	0.791929891	0.653526122	760.5574956	4274.355886	0.7331	7.18E-05	13731.99836	5.68E-05	10877.97256	4.69E-05	8959.517801	0.820152612	79.5675808	811.2588149	5137.235064	0.8168	0.024433403	13391.84096	0.000459174	11252.59332	79.19921834	5066.56097	119.8391	117.0731	112.2219	2.758189839	2.724840617	3.007334433
0.806934606	0.583044521	651.9130898	4545.798187	0.7502	7.07E-05	13953.88816	5.70E-05	11267.45583	4.12E-05	8125.376433	0.830439527	78.64298681	693.3279681	5339.406148	0.8263	0.024152265	13612.57618	0.000454404	11580.98309	78.28866112	4943.031587	0.810545095	0.644504021	649.4831099	4561.723324	0.746	7.07E-05	13951.35241	5.73E-05	11312.28928	4.56E-05	8984.341555	0.831755255	78.56982227	697.0807641	5362.873776	0.8271	0.024128984	13610.47624	0.000454134	11594.76927	78.2129378	4978.248338	120.8254	117.9214	112.8525	3.285592008	3.271058245	3.478784809
0.819081122	0.519665491	721.8953352	4785.952829	0.7653	7.76E-05	12696.76519	6.36E-05	10400.0451	4.03E-05	6597.956749	0.834084559	78.04324844	752.103556	5429.986545	0.8324	0.02398255	12389.82893	0.000457567	10580.09373	77.71494615	4171.494113	0.819097073	0.566166798	716.6685083	4753.253617	0.7602	7.76E-05	12692.3974	6.36E-05	10395.12122	4.38E-05	7210.715338	0.838343509	77.77648749	760.9609721	5510.767988	0.8353	0.023899567	12388.61355	0.000456547	10631.12948	77.44513517	4217.702143	114.8269	112.6212	107.8877	3.176591946	2.969058868	3.135584269
0.831521503	0.434732678	616.7465867	5060.301774	0.7837	8.46E-05	11649.22866	7.05E-05	9675.166265	3.65E-05	5106.831696	0.852186428	75.9111319	646.5409261	5849.309635	0.8552	0.023352019	11386.31455	0.000454446	9923.447797	75.64303003	3141.524673	0.821456779	0.495188557	600.4811443	4837.612224	0.769	8.46E-05	11649.42822	6.96E-05	9557.435153	4.16E-05	5813.457997	0.847200864	76.64168535	639.1163696	5720.90511	0.8473	0.023568976	11381.57725	0.000457597	9864.540361	76.34830734	3453.556592	109.8749	107.9793	102.8035	3.497692095	3.537353744	3.677429503
0.799936418	0.63128793	767.0639245	4414.018206	0.7415	7.13E-05	13828.63007	5.70E-05	11066.77182	4.49E-05	8738.265003	0.824570315	79.32487186	811.3004638	5214.127654	0.8194	0.024355593	13491.62485	0.000457784	11397.56334	78.94791557	5209.062607	0.796851078	0.682717228	755.573728	4326.85268	0.7331	7.13E-05	13819.95512	5.68E-05	11010.10734	4.85E-05	9463.25549	0.822728636	79.43412369	806.4553899	5180.486434	0.8182	0.024391236	13486.15717	0.000458277	11364.96737	79.06370271	5128.961256	120.3595	117.5013	112.5548	2.893796771	2.698110137	2.810906786
0.810583937	0.613230195	659.4046412	4586.607362	0.7498	7.45E-05	13230.92558	6.04E-05	10727.02542	4.57E-05	8113.319552	0.829389243	78.6137931	693.6477919	5325.768784	0.8265	0.024150151	12913.93466	0.000457398	10970.6838	78.26971715	4541.66219	0.798230522	0.631984846	649.1712894	4379.215938	0.7391	7.45E-05	13233.22609	5.95E-05	10564.64683	4.72E-05	8344.341226	0.828558538	79.07420925	694.4613139	5285.500487	0.822	0.024281945	12912.96594	0.000459478	10963.02613	78.69820321	4971.764234	117.5912	114.9362	110.1912	3.197949743	3.203362227	3.425236132
0.835357831	0.446059679	867.5422086	5113.165519	0.7842	6.37E-05	15469.01581	5.32E-05	12930.2725	2.85E-05	6872.828105	0.846834331	76.72191376	891.7957472	5709.90443	0.8465	0.023570808	15103.29096	0.000440214	13098.30721	76.42045637	4643.911872	0.820347057	0.522091503	847.1466667	4798.174641	0.765	6.37E-05	15475.18327	5.22E-05	12705.82992	3.34E-05	8028.751895	0.846022901	76.73390051	895.1968569	5696.415101	0.8463	0.023576372	15101.09098	0.000440269	13081.83152	76.43851587	4553.43318	125.868	124.4098	120.0403	2.739849631	2.612826814	2.600399183
0.813338939	0.534185219	764.4604136	4676.372678	0.7591	7.74E-05	12735.45752	6.29E-05	10356.80533	4.12E-05	6823.452378	0.835419037	78.13021522	803.5915595	5445.557172	0.8317	0.024002401	12430.593	0.000457775	10631.18711	77.78035639	4471.539858	0.798135673	0.616912063	745.0878022	4385.247737	0.7403	7.74E-05	12729.24125	6.18E-05	10152.82465	4.75E-05	7889.770634	0.829226189	78.54231141	799.4296422	5327.330029	0.8272	0.024132561	12428.07894	0.000459444	10550.93706	78.20348357	4325.814313	115.0909	112.8711	107.4293	2.792496587	2.847399654	3.141178363
0.84526708	0.403486768	679.7066349	5333.350684	0.7973	8.49E-05	11605.50508	7.19E-05	9798.257313	3.39E-05	4728.621347	0.855629996	75.56810244	703.7571595	5928.840279	0.859	0.023249371	11343.34319	0.000453303	9923.902349	75.30840372	3034.323632	0.833675171	0.472065607	665.6752947	5066.533573	0.7804	8.49E-05	11608.72886	7.08E-05	9669.187865	3.97E-05	5521.961302	0.853828707	75.88907072	698.4651081	5877.569258	0.8555	0.023344172	11338.27189	0.000454753	9897.197149	75.61650449	3194.63986	109.7553	107.8334	102.8655	3.351062803	3.275888344	3.604720482
0.818194232	0.555321945	636.6667543	4747.988962	0.761	7.07E-05	13942.72825	5.79E-05	11412.08935	3.94E-05	7714.814323	0.834368362	78.02450156	668.410281	5435.285852	0.8326	0.023970091	13609.39743	0.000451713	11632.71056	77.69627598	4562.118905	0.810427752	0.58016485	629.1076841	4599.172826	0.7522	7.08E-05	13939.93818	5.73E-05	11299.01564	4.11E-05	8068.30896	0.83760557	78.24969901	665.0375632	5470.495786	0.8306	0.024027655	13605.59415	0.000452908	11674.06332	77.88336327	5103.499157	120.5507	117.9241	113.6775	3.243767795	3.332047297	3.638693962
0.820273352	0.518339642	787.0597833	4805.212244	0.7661	6.76E-05	14579.35935	5.55E-05	11955.65751	3.50E-05	7554.302049	0.834954889	78.06633021	818.5892814	5441.091805	0.8322	0.023978506	14233.68169	0.000449341	12170.18269	77.73362018	4849.41204	0.80380673	0.617484869	768.1171486	4468.042905	0.7435	6.76E-05	14590.78776	5.43E-05	11733.4779	4.18E-05	8981.937189	0.836133891	77.82520666	831.6617947	5474.522224	0.8347	0.02390686	14240.9607	0.000448194	12197.51821	77.50080069	4720.127591	122.8918	120.7232	116.2306	2.840474038	2.775604756	2.867476877
0.831125742	0.468685832	759.8069815	5025.823152	0.7792	6.49E-05	15197.75449	5.39E-05	12637.92829	3.05E-05	7087.697125	0.842299613	77.25309229	783.1638915	5604.545671	0.8408	0.023731298	14836.66972	0.000443512	12801.53106	76.93853141	4764.972645	0.831961152	0.477456647	759.1228003	5032.010918	0.7785	6.49E-05	15198.90482	5.40E-05	12651.57768	3.11E-05	7216.668337	0.849315897	76.5717991	790.2322565	5759.921952	0.8482	0.023524839	14836.39507	0.000440602	12901.69197	76.26729168	4613.20514	125.9396	123.1244	118.7018	2.9893397	2.943556461	3.039288858
0.803742402	0.627437794	834.5854741	4468.046133	0.7435	7.43E-05	13258.86859	5.97E-05	10659.74906	4.66E-05	8307.215198	0.824026075	79.71088769	869.4124571	5182.312653	0.8156	0.024471665	12938.17472	0.000462059	10927.45616	79.31574791	5222.704267	0.794291026	0.669441791	826.3740958	4296.401665	0.7327	7.43E-05	13251.60843	5.90E-05	10523.50318	4.97E-05	8877.964242	0.821526185	79.74975466	873.6781158	5146.323111	0.8152	0.024483693	12927.5195	0.000462157	10878.38442	79.35466619	5245.664377	117.9235	115.0075	109.8855	2.540088138	2.57756547	2.66059951
0.814535876	0.55781415	768.186114	4681.598997	0.7576	6.96E-05	14151.28102	5.67E-05	11529.94134	3.90E-05	7867.591209	0.82871549	78.88639398	801.3541692	5300.309382	0.8239	0.02422138	13809.77206	0.00045455	11726.1855	78.51671474	5214.369462	0.798943908	0.667029084	746.3044306	4366.223158	0.7358	6.97E-05	14149.89263	5.56E-05	11309.01503	4.65E-05	9425.735254	0.82711455	79.08834266	796.4714042	5264.044293	0.8218	0.024283129	13802.33244	0.000455496	11694.89625	78.71735363	5251.360185	121.5885	118.8135	114.0287	2.707095815	2.826431982	2.947554293
0.81557054	0.532658694	761.2386647	4713.598765	0.7609	7.85E-05	12550.00513	6.40E-05	10231.90833	4.17E-05	6701.899461	0.837925102	77.49779263	810.9806706	5522.337311	0.8381	0.023820786	12255.28135	0.000455891	10511.88052	77.18639834	3910.581673	0.815178092	0.564803805	761.919276	4684.50218	0.7569	7.85E-05	12543.22632	6.41E-05	10215.99539	4.42E-05	7110.65689	0.838199911	77.71683216	809.0882881	5512.238426	0.8359	0.023883283	12252.77366	0.000456947	10513.91876	77.38954587	4119.048092	114.3236	112.0376	107.33	2.836456071	2.813749498	2.967507372
0.839219478	0.410813542	839.8597777	5212.804447	0.7916	6.31E-05	15635.23231	5.29E-05	13130.56114	2.60E-05	6394.290677	0.849603728	76.53871538	860.4104891	5766.089688	0.8485	0.023514739	15269.67071	0.000438895	13287.89887	76.24032535	4635.132823	0.826989752	0.510288598	819.386696	4931.431474	0.7727	6.30E-05	15640.62003	5.21E-05	12946.86427	3.24E-05	7929.242267	0.847811827	76.41249853	864.620572	5745.519713	0.8497	0.02348166	15259.8709	0.000438302	13243.59428	76.13265273	4364.537955	126.8109	125.0154	120.5581	2.928641526	2.708461342	2.76485522
0.83160296	0.460593654	682.4810645	5048.111054	0.7816	8.12E-05	12139.21085	6.76E-05	10086.05302	3.72E-05	5621.373593	0.847053801	76.39938809	716.3125441	5734.270652	0.8498	0.023496523	11861.15533	0.00045353	10278.27419	76.12369844	3359.339845	0.825410792	0.509404592	669.2187054	4900.388766	0.7709	8.12E-05	12137.3623	6.71E-05	10008.4267	4.11E-05	6221.191594	0.841959984	77.22042563	704.1042682	5601.601593	0.8411	0.023738727	11857.8389	0.000457101	10216.05168	76.91109384	3768.634051	112.3858	110.179	105.358	3.35790982	3.237554478	3.439336564
0.877211319	0.285782557	460.9545998	6079.196655	0.837	4.83E-05	20536.26714	4.23E-05	18021.2885	1.38E-05	5875.147192	0.876470983	73.29514124	468.7148023	6451.705763	0.885	0.022533042	20079.54542	0.000411737	18003.67313	73.09594183	4079.297062	0.870521328	0.308713493	453.3989862	5915.145547	0.8286	4.83E-05	20526.74185	4.20E-05	17865.25801	1.49E-05	6349.613686	0.882635648	72.77269157	473.7472232	6605.14765	0.8913	0.022374132	20073.05834	0.000409454	18115.40037	72.57927556	3976.822955	144.5472	143.5014	138.1834	5.183644679	4.928427542	5.477258844
0.880466893	0.271733967	470.2631829	6166.344418	0.842	5.20E-05	19073.39952	4.58E-05	16809.30389	1.42E-05	5140.064608	0.880401893	72.93590464	479.9452378	6550.968739	0.8893	0.022428015	18645.01428	0.000413446	16797.85356	72.74250423	3655.971888	0.865335783	0.303294574	467.5675872	5813.928537	0.8256	5.20E-05	19069.28573	4.50E-05	16513.87096	1.59E-05	5744.203125	0.884820748	72.58549687	485.5846016	6660.4906	0.8936	0.022320357	18640.76723	0.000411934	16870.71573	72.39246759	3650.592435	140.3797	137.9677	132.3627	5.787704891	5.678948557	5.891837465
0.879051679	0.261096606	569.0130548	6146.567292	0.8426	4.77E-05	20730.38535	4.20E-05	18227.26738	1.24E-05	5416.576074	0.888859865	72.16657394	585.15311	6770.028374	0.8987	0.022189787	20267.39157	0.000406275	18414.41936	71.98164896	3835.508512	0.871939565	0.301167128	560.5524004	5954.153411	0.8311	4.77E-05	20743.89412	4.16E-05	18099.12265	1.44E-05	6216.048731	0.887880972	72.11521352	584.8004893	6754.574066	0.8992	0.022177463	20272.7004	0.000406006	18402.7879	71.94162306	3594.405138	145.9618	144.2484	137.8684	4.255248613	4.166569025	4.515028399
0.881713258	0.269773509	515.8786909	6195.871576	0.8433	4.57E-05	21666.02467	4.03E-05	19104.2239	1.24E-05	5829.898257	0.884182364	72.64762545	528.4639337	6644.099014	0.8928	0.022334108	21186.00594	0.00040663	19156.9355	72.45733397	4118.096662	0.872780894	0.303500541	505.9738963	5969.145315	0.8313	4.57E-05	21671.04487	3.99E-05	18918.99092	1.39E-05	6563.828702	0.884116379	72.63803337	527.2174936	6643.572741	0.8929	0.022331613	21186.10964	0.00040659	19154.14152	72.44921908	4082.133386	149.1455	147.1837	141.8057	4.332127624	4.583094403	4.942038801
0.878618503	0.265383702	659.942029	6134.203849	0.8418	4.33E-05	22830.99525	3.81E-05	20061.4128	1.15E-05	6056.50986	0.884135355	72.71883408	673.9952915	6637.876682	0.892	0.022351785	22320.26132	0.000404877	20176.48159	72.52231792	4488.688004	0.868932789	0.30317288	655.7190252	5891.955001	0.8289	4.33E-05	22830.41066	3.77E-05	19836.8949	1.32E-05	6909.742792	0.882938587	72.8098552	669.0044898	6608.25087	0.8909	0.022379325	22322.64878	0.00040527	20153.83053	72.61186176	4515.498485	153.2243	151.1491	145.8624	3.630590794	3.701900754	3.764686739
0.88014559	0.259988145	472.2073503	6170.908477	0.8435	4.17E-05	23768.17475	3.67E-05	20917.61346	1.08E-05	6187.734203	0.885344744	72.3267901	484.333482	6689.585992	0.8966	0.022235724	23246.18871	0.00040159	21041.58735	72.15024158	4196.079188	0.873628676	0.288936885	468.1617471	5996.908087	0.8334	4.17E-05	23772.66679	3.64E-05	20769.25495	1.20E-05	6866.977802	0.881514085	72.83604716	479.6807412	6579.249972	0.8905	0.022387751	23245.87097	0.000403921	20955.68555	72.6444774	4545.790343	156.0014	154.2028	149.1398	4.900795654	4.826538321	5.219986203
0.884612966	0.253953269	629.0925183	6272.799622	0.8474	3.96E-05	24986.4168	3.50E-05	22108.96773	1.01E-05	6335.636417	0.880369886	73.02319036	633.3823033	6544.157942	0.8883	0.022441081	24417.04571	0.000402981	21978.26276	72.82439151	4974.935044	0.877994004	0.280381634	624.4273107	6101.994156	0.8385	3.96E-05	24975.27919	3.48E-05	21925.55046	1.11E-05	7011.809302	0.886705791	72.22967253	643.5096904	6723.208287	0.8978	0.022204038	24425.33994	0.000399332	22138.64563	72.05380514	4390.800958	160.2412	157.96	153.3452	3.811984071	3.7710476	3.985528442
0.882564838	0.257656379	466.1233298	6226.275866	0.8457	4.58E-05	21654.65673	4.04E-05	19123.31791	1.19E-05	5541.623034	0.881524315	72.85443109	472.9683253	6578.085252	0.8903	0.022396787	21166.34157	0.000407618	19083.60488	72.66079742	4163.433337	0.873740171	0.300492611	458.0825424	5991.291722	0.8323	4.58E-05	21640.42124	4.00E-05	18911.09075	1.38E-05	6505.54031	0.882769	72.54581049	476.175523	6624.174181	0.8939	0.022306802	21154.02797	0.000406239	19089.86273	72.36817011	3847.064101	149.0507	147.1017	142.0131	5.156406647	5.217255707	5.308816101
0.882051404	0.269513642	579.0132859	6199.988849	0.843	4.14E-05	23899.23238	3.65E-05	21083.73752	1.12E-05	6437.614116	0.881130139	72.89525736	587.8514273	6567.725781	0.8898	0.022405086	23359.79096	0.000403983	21044.47058	72.70162635	4631.901326	0.875497682	0.280898876	577.4317475	6048.187903	0.8366	4.14E-05	23888.81317	3.63E-05	20907.54043	1.16E-05	6712.711332	0.884725188	72.48541411	593.3069185	6666.268135	0.8947	0.022282607	23362.65329	0.00040212	21129.5753	72.3034612	4349.565776	155.8677	154.7224	149.8189	4.191729561	4.184846262	4.220415002
0.87439503	0.280775212	466.5363082	6025.766838	0.8359	5.08E-05	19499.69326	4.44E-05	17058.27575	1.43E-05	5452.041034	0.877758761	73.28535924	478.373249	6476.340488	0.8852	0.022530474	19064.55886	0.000413962	17121.13765	73.0794276	3990.633981	0.863312949	0.319946452	463.8173299	5757.194718	0.8217	5.08E-05	19492.58817	4.39E-05	16831.93225	1.63E-05	6232.996227	0.875341319	73.4415261	477.2728405	6420.386845	0.8833	0.022578832	19062.5758	0.000414639	17072.70288	73.23662317	3972.125778	141.3205	139.7107	134.2429	5.147851955	5.127982596	5.188265567
0.888206613	0.236265667	667.2757409	6376.359728	0.8537	4.00E-05	24744.11468	3.55E-05	21976.1333	9.43E-06	5852.498887	0.887646858	72.24821747	678.2508913	6740.68672	0.8976	0.022209336	24194.60539	0.000399779	21951.84304	72.06986006	4420.52295	0.874220355	0.279751226	656.3091735	6024.121875	0.8361	4.00E-05	24747.93446	3.50E-05	21635.79406	1.12E-05	6923.03313	0.882293442	72.69132482	673.9038332	6604.539565	0.8922	0.022343505	24197.71184	0.000401756	21828.30024	72.50605987	4577.412127	158.0646	157.5928	153.1454	3.652071582	3.58758807	3.636297408
0.879034062	0.260895381	390.2262202	6143.085501	0.8421	4.37E-05	22766.40589	3.84E-05	20009.21067	1.14E-05	5938.699204	0.880950818	72.91254496	396.4743705	6563.022932	0.8896	0.022412284	22269.46774	0.000405996	20068.41075	72.71797162	4426.845436	0.872544331	0.287290168	383.1580336	5983.176978	0.834	4.37E-05	22766.34592	3.81E-05	19864.44696	1.25E-05	6551.504676	0.883751226	72.42104088	400.5615367	6652.07237	0.8954	0.022267397	22267.70773	0.000403745	20125.22753	72.24693633	3972.150212	152.1928	151.0326	145.7074	6.150514463	6.453583287	7.017177869
0.85404005	0.348286912	488.5580478	5550.663052	0.8114	6.42E-05	15425.51541	5.48E-05	13178.25559	2.23E-05	5374.482992	0.868485993	74.10816676	513.676185	6249.49526	0.8755	0.022792623	15070.03952	0.000429243	13385.23792	73.889106	3377.614049	0.852146525	0.356824926	493.2836301	5505.894164	0.8088	6.42E-05	15430.64132	5.47E-05	13153.32428	2.30E-05	5480.088032	0.865646306	74.4490592	509.3044975	6175.781092	0.8716	0.02289433	15067.28304	0.000430741	13340.66263	74.21972557	3541.096604	127.2127	124.4752	115.8711	4.895902237	4.885241546	5.314779844
0.873054023	0.284874655	517.0510975	5989.421255	0.8337	4.82E-05	20533.25849	4.21E-05	17933.03104	1.38E-05	5828.843349	0.879728803	72.99437317	530.6745442	6534.025208	0.8886	0.022441956	20062.4138	0.000410422	18045.62875	72.7998068	3997.964664	0.870442058	0.308796911	513.9800893	5914.529142	0.8287	4.82E-05	20527.84506	4.20E-05	17871.86984	1.49E-05	6335.832871	0.878470779	73.2969156	527.0969382	6488.896735	0.8851	0.02253049	20068.7868	0.000411782	18034.26555	73.0876838	4292.565247	145.1851	143.3881	137.7663	4.743821033	4.593591012	4.798008369
0.880722907	0.256574271	381.2070599	6185.273158	0.8442	4.74E-05	20987.28394	4.17E-05	18487.53867	1.22E-05	5371.186923	0.878065746	73.1005297	387.9969571	6495.214358	0.8873	0.022473893	20514.43289	0.000410087	18422.23919	72.90646699	4067.981742	0.870666246	0.290834737	376.8263171	5935.911475	0.8314	4.73E-05	20997.04005	4.12E-05	18293.42403	1.38E-05	6078.703873	0.880804983	72.78049602	389.2172596	6569.772753	0.8911	0.022378266	20512.40826	0.000408658	18474.0915	72.59556479	3886.263382	146.7333	145.0013	139.0811	6.237481151	6.281918362	6.4879213
0.881467096	0.276504808	426.6630654	6185.094741	0.8423	5.14E-05	19351.69073	4.52E-05	17077.68031	1.43E-05	5289.14223	0.879158554	72.9995498	436.3670231	6522.970287	0.8885	0.022447549	18907.34519	0.000413163	17009.561	72.8080009	3678.583455	0.863812184	0.309046752	422.247116	5776.448937	0.8235	5.14E-05	19341.38664	4.44E-05	16719.70324	1.60E-05	5936.959927	0.886173982	72.40008931	442.3996428	6700.350301	0.8958	0.022265037	18911.9712	0.00041053	17143.86018	72.21467808	3542.761107	141.271	138.9598	133.271	6.32236973	6.54241423	6.82646021
0.883076572	0.257122591	348.6867242	6236.390472	0.8459	5.12E-05	19444.58967	4.52E-05	17171.08751	1.32E-05	4984.393545	0.879147912	73.05406014	354.7324023	6518.758081	0.8879	0.022462463	19006.4871	0.000413242	17086.23294	72.8572012	3824.289222	0.866557538	0.306957048	340.7778584	5838.778826	0.8265	5.12E-05	19444.93128	4.43E-05	16852.33837	1.57E-05	5957.777132	0.885693469	72.37790179	357.0064732	6692.852679	0.896	0.022259848	19015.61953	0.000410227	17222.34197	72.1985583	3476.997098	142.2564	139.5073	131.6056	6.599762044	6.82965202	6.715895223
0.874456898	0.292495804	287.7890194	6015.389835	0.8342	5.22E-05	19126.77655	4.56E-05	16741.92358	1.54E-05	5538.17286	0.882623369	72.77044766	296.9995512	6605.282509	0.8913	0.022378019	18698.23494	0.000412934	16885.4451	72.57927638	3594.363514	0.871168135	0.314023654	285.6413227	5925.498431	0.8286	5.22E-05	19125.78747	4.55E-05	16678.51496	1.65E-05	5950.220492	0.879917376	72.92309422	297.6791095	6542.836294	0.8894	0.022425682	18706.24837	0.000413524	16849.02581	72.73432531	3542.840904	140.6588	138.2094	131.3588	8.095318558	7.954945106	8.685692981
0.872070489	0.299987976	402.1451244	5960.118913	0.8317	5.47E-05	18149.27678	4.77E-05	15836.24293	1.65E-05	5407.021041	0.874424037	73.43242019	414.2377179	6404.257641	0.8834	0.022580051	17741.03577	0.000417911	15874.99116	73.22833361	3679.243038	0.865677197	0.311666262	400.2386612	5812.518069	0.8246	5.47E-05	18153.23211	4.73E-05	15728.75309	1.71E-05	5629.794203	0.873655186	73.57729386	410.2471362	6379.872859	0.8817	0.022623509	17732.34842	0.000418629	15847.53024	73.36952482	3758.851877	136.0268	134.8948	129.1244	5.729247923	5.604706322	6.066887558
0.876255176	0.264674366	657.5083939	6082.582093	0.8399	4.34E-05	22795.81295	3.80E-05	19978.83198	1.15E-05	6013.130968	0.88129996	73.01012943	667.3212155	6562.803264	0.8885	0.022439724	22282.47665	0.000406247	20082.24369	72.80799978	4600.502307	0.864922619	0.298547215	650.5590799	5810.012833	0.826	4.34E-05	22789.40944	3.75E-05	19711.43434	1.30E-05	6799.179177	0.879325171	73.30007909	665.5807253	6504.934019	0.8851	0.022525742	22288.11366	0.000407553	20048.6847	73.08768297	4816.71427	153.2774	150.9612	145.6964	3.684786186	3.571371524	3.719788575
0.876810889	0.27758559	475.6391507	6080.992843	0.8383	5.37E-05	18472.61171	4.70E-05	16204.15122	1.50E-05	5078.816891	0.878779364	73.01621074	487.9251379	6514.611393	0.8883	0.022454818	18049.30789	0.000415252	16221.10805	72.82439397	3530.283238	0.865251198	0.320951687	465.0740471	5800.539937	0.8238	5.37E-05	18463.01177	4.64E-05	15977.60184	1.72E-05	5913.687181	0.875462717	73.4319674	483.3905366	6423.370161	0.8834	0.022579075	18045.93185	0.000417124	16157.27315	73.22833335	3748.245415	139.305	135.167	129.9076	4.906340286	5.322772868	5.521961811
0.879528694	0.278657303	383.4580407	6138.062969	0.8401	7.03E-05	14145.85954	6.19E-05	12435.25926	1.94E-05	3979.004761	0.883842002	72.61907961	394.5729482	6639.679655	0.8931	0.022350602	13843.0215	0.00042819	12506.94022	72.4329993	2627.63901	0.871170154	0.310319855	378.5777912	5925.034037	0.8285	7.03E-05	14142.00821	6.13E-05	12310.63119	2.16E-05	4433.054556	0.881978782	72.64668982	394.2288563	6601.7288	0.8927	0.022360624	13834.88675	0.000428282	12468.36748	72.46545458	2573.749188	123.5441	118.1106	109.4282	6.016498582	6.416133387	6.675376001
0.876227124	0.270885473	335.5844357	6076.546419	0.8391	6.86E-05	14539.21404	6.01E-05	12738.18547	1.85E-05	3935.989036	0.882307404	72.76239623	344.444245	6599.591878	0.8914	0.02239152	14210.00101	0.000427371	12815.82581	72.5711371	2791.707875	0.860924357	0.334718826	326.0425428	5696.122738	0.818	6.87E-05	14519.41333	5.92E-05	12484.77033	2.27E-05	4901.289976	0.872012122	73.73857695	343.5132985	6338.599682	0.8798	0.022685774	14218.23801	0.000431409	12682.4245	73.52797544	3038.111275	124.0524	120.0454	112.7724	6.997746369	7.072152348	7.173367287
0.888880006	0.240482605	398.3871383	6388.070399	0.8537	4.38E-05	22688.1025	3.89E-05	20184.12189	1.06E-05	5429.787279	0.886213421	72.27708426	402.9239857	6710.292911	0.8972	0.022222956	22163.41496	0.000403272	20076.65686	72.10199163	3961.641329	0.878031212	0.28126863	389.9543341	6103.796232	0.8387	4.38E-05	22684.25337	3.84E-05	19929.31282	1.24E-05	6346.969119	0.882525218	72.6422491	400.5734767	6612.375448	0.8928	0.022332241	22172.13586	0.000404867	20013.4075	72.45733338	4180.014337	153.7605	150.0862	144.6058	5.712822398	6.122104994	6.277165472
0.889132262	0.237649262	322.0550222	6395.898619	0.8542	4.57E-05	21836.12117	4.06E-05	19421.42084	1.08E-05	5199.5048	0.885932385	72.43862392	326.3613314	6693.247291	0.8953	0.022271875	21344.41159	0.00040571	19329.17569	72.25500671	4009.094605	0.879340543	0.282411821	316.565062	6129.105815	0.8392	4.57E-05	21848.33842	4.01E-05	19222.41742	1.30E-05	6130.209604	0.891389274	71.85682624	330.7836879	6843.429521	0.9024	0.022096976	21359.25078	0.000403048	19464.93678	71.68651048	3697.12234	150.5417	147.6131	140.7697	7.641888583	7.541247138	8.486015668
0.874719638	0.301895848	456.4437245	6014.319654	0.8334	5.53E-05	17944.66415	4.84E-05	15696.95776	1.67E-05	5420.340173	0.878383656	73.07661109	468.1070302	6502.863452	0.8876	0.022474044	17542.13294	0.000416927	15756.96541	72.88182687	3501.21361	0.865830941	0.317321689	451.1132945	5813.735565	0.8244	5.53E-05	17945.49454	4.78E-05	15542.12508	1.75E-05	5712.182072	0.877754484	73.37208776	467.4055644	6470.27211	0.8842	0.02256022	17549.36892	0.000418265	15758.33923	73.16207903	3757.746664	137.4175	133.8328	125.5614	5.344435775	5.320342485	6.095197293
0.86849557	0.298575911	469.0625151	5882.891383	0.8286	5.44E-05	18198.73992	4.73E-05	15807.13794	1.63E-05	5428.523172	0.872453077	73.88112047	476.8225917	6336.791619	0.8782	0.022713181	17786.82589	0.000419805	15871.95493	73.66193407	3978.044978	0.861749998	0.3406674	459.7353624	5709.342501	0.8181	5.45E-05	18190.63159	4.69E-05	15671.69572	1.85E-05	6208.824471	0.879502628	72.94219523	486.2669816	6533.457715	0.8892	0.022432869	17793.66982	0.000415571	16002.6546	72.75068523	3467.292173	138.4175	134.3853	127.474	4.951241637	4.809287256	5.169634803
0.877704369	0.263558516	300.5499524	6112.339914	0.8408	6.06E-05	16484.44279	5.32E-05	14482.70048	1.61E-05	4310.874762	0.876390036	73.37574935	305.9496663	6444.428798	0.8841	0.022568048	16107.45934	0.000422971	14442.86195	73.17035523	3359.063002	0.861024407	0.336594912	292.3302348	5695.029843	0.8176	6.06E-05	16484.38001	5.22E-05	14204.42095	2.05E-05	5503.431629	0.875850599	73.23145535	307.9016597	6444.782545	0.8857	0.022527381	16108.39257	0.000422244	14437.94334	73.03817365	3172.981709	131.9935	127.5373	120.4408	7.765414203	7.629679463	8.416929093
0.877406075	0.279971371	311.7822975	6090.836335	0.8383	6.10E-05	16379.39604	5.35E-05	14381.39246	1.72E-05	4538.922462	0.880380916	72.80534351	321.9550965	6559.911765	0.8908	0.022399094	16011.0009	0.000420705	14424.53694	72.62001583	3017.73507	0.868906931	0.31021148	307.9003021	5882.154804	0.8275	6.10E-05	16369.68	5.30E-05	14228.73865	1.89E-05	5069.264048	0.881312268	72.86003145	321.8130757	6573.809481	0.8902	0.022414155	16009.49843	0.000421022	14436.23569	72.6689625	3109.199618	131.6815	126.9605	120.1578	7.80368232	7.568998596	7.788009961
0.872794106	0.315827511	475.7022404	5962.116117	0.8302	5.52E-05	17948.56456	4.82E-05	15675.29472	1.75E-05	5641.518068	0.880959178	72.95681026	491.5817118	6560.045102	0.8891	0.022436149	17544.78529	0.000416358	15812.60977	72.75886824	3535.135755	0.865089652	0.309174645	475.5773846	5807.026906	0.8251	5.52E-05	17937.97915	4.78E-05	15521.76661	1.71E-05	5545.155496	0.878811759	73.27128981	489.7854077	6497.196973	0.8854	0.022529694	17537.4293	0.000417809	15763.43888	73.06292095	3726.875424	137.3155	133.8296	125.7056	4.952510449	4.745204299	5.605490937
0.888273684	0.237582006	408.9871134	6376.826148	0.8536	4.36E-05	22767.44213	3.87E-05	20236.90972	1.04E-05	5392.053889	0.884489435	72.3561705	412.9517965	6670.980362	0.8962	0.022247529	22246.80239	0.000403444	20114.13442	72.18244455	3942.073979	0.874451668	0.288196525	398.4204913	6017.363571	0.8345	4.36E-05	22777.74967	3.81E-05	19934.60847	1.27E-05	6504.361294	0.882165986	72.68373865	410.9195338	6602.527289	0.8923	0.02234455	22258.31637	0.000404887	20087.12094	72.49793483	4213.888715	154.0103	150.364	145.0783	5.525630635	5.960411395	6.140844332
0.885300496	0.245265263	291.575697	6302.012351	0.8501	5.75E-05	17411.06764	5.08E-05	15427.4756	1.42E-05	4214.373603	0.886291804	72.43109225	298.1811481	6700.939915	0.8954	0.02228089	17021.87927	0.000416061	15436.60598	72.24693944	3160.960353	0.880158721	0.270848182	289.0261345	6159.8287	0.8418	5.74E-05	17412.5999	5.05E-05	15345.67998	1.57E-05	4672.107627	0.888982998	71.93997559	300.6505048	6789.282925	0.9013	0.0221354	17026.8592	0.000413794	15491.05836	71.77400274	2858.037723	135.6844	131.3108	122.9474	7.786719248	8.376168776	8.78189235
0.880724652	0.26111177	369.4831101	6181.953894	0.8437	6.78E-05	14679.00664	5.97E-05	12928.12165	1.76E-05	3840.006756	0.887954205	72.12312312	381.8181515	6755.557446	0.8991	0.02219957	14347.16149	0.000423926	13016.61665	71.94962794	2561.748526	0.86975459	0.313670978	361.899311	5894.387647	0.8273	6.78E-05	14680.52411	5.90E-05	12766.4819	2.13E-05	4596.273661	0.882688046	72.70941704	379.2522422	6610.958744	0.892	0.022375687	14353.28318	0.000426391	12953.62943	72.52232206	2750.073767	125.3918	120.5168	111.9591	6.477213348	6.442089549	6.671943284
0.879582922	0.254590688	319.8856771	6165.575998	0.8441	5.04E-05	19760.70181	4.44E-05	17386.26627	1.29E-05	5001.980689	0.883741731	72.43878463	330.3192583	6650.585344	0.8952	0.02227901	19313.3788	0.000409846	17450.44754	72.26307856	3468.391644	0.872665793	0.290020416	316.8902366	5976.571274	0.8327	5.05E-05	19745.20764	4.41E-05	17230.00402	1.46E-05	5753.112165	0.885199302	72.40180864	331.1703695	6681.462208	0.8957	0.022266606	19311.13085	0.000409725	17474.51365	72.22273985	3538.746009	143.7515	140.1847	132.915	7.303762575	7.329282769	8.035656476
0.870265958	0.299903568	237.7868852	5917.596914	0.8296	5.04E-05	19931.86222	4.38E-05	17376.53367	1.54E-05	5874.40405	0.881585562	72.85532966	249.137931	6579.123554	0.8903	0.022401312	19475.59766	0.000411654	17577.45269	72.66079846	3815.485904	0.86419118	0.341058795	234.609173	5757.969993	0.8198	5.04E-05	19917.65174	4.35E-05	17232.21711	1.74E-05	6711.271774	0.881734472	72.95209177	248.2764283	6575.11336	0.8892	0.02242904	19445.89103	0.000412243	17532.63253	72.75068496	3993.603914	143.5583	140.8577	133.6897	9.836473002	9.415904137	10.07784768
0.891132412	0.227665034	316.8005598	6452.496618	0.8574	4.78E-05	20854.00653	4.26E-05	18589.24118	1.09E-05	4735.372288	0.891115034	71.81249308	323.6297486	6841.281537	0.9029	0.022086844	20395.3532	0.000404727	18580.95589	71.6468127	3433.056374	0.882990652	0.260730756	312.5773915	6233.432541	0.8457	4.78E-05	20855.11292	4.22E-05	18424.20449	1.25E-05	5433.80324	0.884004915	72.57721576	319.8399731	6645.723814	0.8936	0.022316217	20388.51265	0.000408152	18434.03944	72.3924663	3852.785922	148.0883	143.5049	137.0503	7.32949542	7.602813689	7.703127281
0.87825469	0.285969722	352.236381	6108.520563	0.8389	7.16E-05	13913.19835	6.29E-05	12216.73255	2.04E-05	3991.720467	0.882187376	72.74405563	361.5807537	6598.636384	0.8916	0.022389435	13600.04699	0.000429931	12260.8933	72.55485868	2641.669022	0.863502495	0.332195538	344.4143606	5750.505059	0.8203	7.17E-05	13894.30867	6.20E-05	11982.45269	2.35E-05	4675.016945	0.875138165	73.60147476	357.9064095	6405.38616	0.8815	0.022645136	13598.31458	0.000433613	12165.13797	73.38617532	2997.906636	121.5843	117.407	109.9574	6.762757833	6.594645631	7.020426286
0.877897627	0.266912377	543.4135061	6117.596362	0.8411	5.31E-05	18655.71799	4.66E-05	16384.11496	1.42E-05	4967.06218	0.882379309	72.49446618	558.5702627	6620.397652	0.8945	0.022298978	18235.20961	0.000412383	16450.77715	72.31962918	3257.856009	0.868241791	0.294089264	534.2472859	5881.677443	0.829	5.31E-05	18655.48335	4.61E-05	16201.64811	1.56E-05	5467.366345	0.879732125	73.05518639	553.17975	6529.832751	0.8879	0.022464325	18237.94932	0.000414936	16411.35826	72.85720166	3681.017457	140.0218	136.147	129.0986	4.639474621	4.84419147	5.011574407
0.882972873	0.265451101	312.8370826	6226.10206	0.8446	6.92E-05	14537.01433	6.11E-05	12851.81881	1.85E-05	3810.832939	0.881614055	72.70470852	321.6878924	6590.674439	0.892	0.022377121	14203.83744	0.000427587	12812.05305	72.5223221	2624.169058	0.871928775	0.298051479	306.842675	5956.015396	0.8314	6.92E-05	14533.68174	6.03E-05	12683.55584	2.08E-05	4277.812124	0.886948642	72.31400535	323.5642284	6722.157895	0.8968	0.022257763	14197.46889	0.000426067	12875.34222	72.13415609	2595.891503	124.4034	119.7022	110.7404	8.758234322	9.413422075	10.13831386
0.874912911	0.287595785	530.3153736	6029.409004	0.8352	5.47E-05	18094.8471	4.78E-05	15833.38571	1.58E-05	5176.152059	0.878722752	73.09285553	542.8807753	6508.258733	0.8874	0.022478537	17684.30775	0.00041653	15889.03568	72.89825271	3513.705882	0.865638005	0.303958359	526.5329863	5821.977121	0.8261	5.47E-05	18097.76359	4.73E-05	15672.22565	1.67E-05	5480.337732	0.87972825	73.11699729	545.3818756	6525.339946	0.8872	0.022483582	17687.34344	0.000416654	15911.14884	72.91468649	3643.539225	138.2804	134.0351	126.5299	4.41897905	4.383590764	4.803759568
0.870861602	0.297785267	568.778286	5934.988926	0.8308	5.58E-05	17715.28671	4.86E-05	15437.091	1.67E-05	5259.350024	0.873104543	73.82284674	578.3246103	6352.697804	0.8789	0.022696545	17303.63818	0.000420807	15451.01457	73.60326634	3882.291728	0.855348572	0.342270323	552.8691428	5581.041569	0.8131	5.59E-05	17709.1509	4.78E-05	15150.99286	1.91E-05	6049.709015	0.869848611	74.01437372	576.7939767	6280.338125	0.8766	0.022755967	17296.59674	0.000421627	15384.72654	73.79638449	3868.794091	135.3924	133.0142	127.73	4.036882738	4.207350515	4.490133628
0.865625901	0.312310491	588.043299	5810.983505	0.8245	5.67E-05	17439.57307	4.91E-05	15101.0741	1.78E-05	5429.589691	0.869432508	74.05741354	596.9214702	6269.908344	0.8761	0.022769721	17041.26481	0.000422507	15157.39277	73.83850119	3809.112887	0.855034397	0.356596794	573.7183724	5562.357337	0.811	5.67E-05	17436.65413	4.85E-05	14913.09213	2.02E-05	6213.165475	0.870960685	74.04667351	600.612005	6298.151889	0.8763	0.022764521	17045.58405	0.000422478	15191.82602	73.82164922	3911.301153	134.5279	131.9673	126.4727	4.136861321	4.007945946	4.444418377
0.877846394	0.279923701	548.2322365	6101.429661	0.8388	4.95E-05	20003.71245	4.35E-05	17559.3951	1.38E-05	5602.899022	0.882406935	72.89167322	561.1759748	6592.555456	0.8899	0.022410453	19554.88549	0.000411108	17641.33263	72.69345849	3969.401169	0.867324673	0.300543807	541.9609668	5857.492568	0.8275	4.95E-05	20009.05571	4.29E-05	17357.23614	1.49E-05	6005.835045	0.878127848	73.25906268	558.798306	6485.170299	0.8855	0.022521557	19555.51417	0.00041271	17560.84298	73.05466848	4094.339582	144.0416	141.3267	135.6166	4.392547033	4.434407188	5.352850123
0.885934135	0.253267397	438.7277758	6307.647357	0.8493	7.65E-05	12957.53785	6.79E-05	11460.73874	1.90E-05	3340.369834	0.886763905	72.21224944	445.8567929	6725.636971	0.898	0.022235106	12685.33853	0.000431953	11490.05709	72.03776374	2285.748552	0.874500994	0.313386205	428.5277578	6002.671473	0.8322	7.65E-05	12965.1943	6.70E-05	11327.43696	2.35E-05	4130.982336	0.881700264	72.70003363	443.3147629	6592.463961	0.8921	0.022381658	12682.80966	0.000433977	11423.685	72.51419406	2435.078691	116.2567	113.883	108.2884	5.435071767	5.400047315	5.702247403
0.87309409	0.270031093	649.1839273	6006.576895	0.8362	5.01E-05	19743.43435	4.37E-05	17243.37097	1.35E-05	5319.394882	0.873349745	73.4853291	656.1292625	6380.814886	0.8827	0.022593428	19293.72301	0.000414167	17233.3194	73.28640399	3922.689362	0.864206036	0.334632245	631.1327326	5767.193132	0.8212	5.01E-05	19745.4586	4.33E-05	17070.9016	1.68E-05	6586.875061	0.872667068	73.74039554	655.9163446	6350.413503	0.8798	0.022667722	19297.44647	0.000415331	17228.40166	73.52797156	4181.460105	142.4214	140.4262	136.1351	3.812928276	3.700939551	3.94480012
0.871776333	0.297186824	706.8300072	5956.104833	0.8318	4.75E-05	20825.29069	4.14E-05	18157.89422	1.41E-05	6174.27699	0.877112972	73.24026194	721.9490798	6467.394942	0.8857	0.022514507	20355.55425	0.000410802	18259.03322	73.03817151	4200.051033	0.862160144	0.32334673	696.0376324	5735.777737	0.8211	4.75E-05	20816.24077	4.10E-05	17944.52341	1.53E-05	6736.108513	0.879039194	73.15223275	725.3858818	6509.680198	0.8868	0.022486652	20350.30458	0.000410456	18289.50229	72.94757398	4261.418245	146.5786	144.2206	139.6496	3.454594338	3.346869528	3.424123222
0.866709174	0.306789302	666.1867361	5839.680624	0.8263	5.56E-05	17770.15103	4.82E-05	15408.81811	1.71E-05	5428.54024	0.875928441	73.23235859	683.1440668	6446.099018	0.8857	0.022522456	17368.59422	0.000417852	15562.58997	73.03817273	3439.166422	0.859596638	0.336273429	653.8599779	5664.871616	0.8163	5.56E-05	17758.35306	4.78E-05	15262.71362	1.87E-05	5969.523215	0.874252978	73.66969456	676.6552742	6384.333258	0.8807	0.022650029	17359.35926	0.000419894	15520.54194	73.45283368	3849.641081	136.0791	133.0817	127.0626	3.604364464	3.501660336	3.668798337
0.878509594	0.263845971	565.3002139	6129.704302	0.8414	4.83E-05	20507.54231	4.24E-05	18014.83754	1.27E-05	5423.194794	0.877004777	73.30963951	574.9810148	6460.464798	0.8849	0.022535587	20049.44016	0.000411825	17979.92024	73.10420249	4207.910272	0.867548111	0.318556202	553.0578973	5848.15407	0.8256	4.83E-05	20511.39535	4.19E-05	17795.03335	1.54E-05	6535.874031	0.881387846	72.71431775	577.8032291	6585.54625	0.8919	0.0223591	20052.30553	0.000409139	18069.86675	72.53044948	3776.667003	145.4088	143.1638	138.5706	4.321652758	4.300763834	4.373604422
0.878582772	0.260570071	593.5501188	6134.852019	0.842	5.12E-05	19319.74869	4.50E-05	16975.90941	1.33E-05	5035.63361	0.880891512	72.98064806	601.9408191	6557.215572	0.8888	0.022439804	18883.55423	0.000412991	17008.84265	72.78342591	3821.397727	0.864268483	0.310846882	577.0063091	5788.449891	0.8242	5.12E-05	19315.86836	4.43E-05	16694.03925	1.59E-05	6013.230041	0.886395718	72.29565217	605.8608696	6712.468004	0.897	0.02223514	18886.70836	0.000409921	17111.67827	72.11806928	3433.207692	142.3777	138.4603	132.3101	4.138120674	4.173370809	4.230500915
0.877434087	0.282645023	433.2413464	6088.079971	0.8378	4.98E-05	19901.96515	4.37E-05	17463.65908	1.41E-05	5626.68095	0.8801226	73.08562416	440.4033348	6534.874268	0.8876	0.022468713	19457.70234	0.000412221	17514.02023	72.88182627	4057.141618	0.871106943	0.320453997	429.814779	5921.655639	0.8282	4.98E-05	19905.61893	4.34E-05	17341.82467	1.60E-05	6356.239435	0.878314232	73.18752116	441.4763624	6493.864718	0.8863	0.022501585	19461.0123	0.000412656	17482.76043	72.98872706	3944.646846	142.9501	141.0774	135.8046	5.271224714	5.327476817	5.699299855
0.878271975	0.252549206	590.0554897	6139.05383	0.8434	4.53E-05	21827.47818	3.98E-05	19174.84014	1.15E-05	5503.356415	0.87948645	73.06217617	599.1549899	6524.723586	0.8878	0.022459274	21339.60205	0.000408159	19193.71065	72.86540656	4280.508448	0.870303788	0.278751501	586.2172869	5940.712605	0.833	4.53E-05	21840.13073	3.94E-05	19018.90541	1.27E-05	6048.826651	0.887024042	72.26431914	608.8517941	6727.004234	0.8974	0.02221951	21339.27624	0.000404574	19351.34533	72.08592295	3894.985291	148.9559	147.9051	143.3293	4.072536702	3.992404537	4.096664681
0.866338225	0.322165574	333.6159262	5817.44234	0.8238	5.63E-05	17704.96006	4.88E-05	15339.07876	1.82E-05	5679.370721	0.872870576	73.57389135	343.0217761	6365.868549	0.8817	0.022625028	17312.56176	0.000419931	15461.65463	73.36952501	3590.947488	0.859934446	0.340934167	324.5589065	5666.048425	0.8157	5.62E-05	17722.61138	4.83E-05	15257.78797	1.93E-05	5997.401496	0.876587597	73.47519819	344.0319366	6441.066591	0.883	0.022591848	17298.14349	0.000419665	15504.96847	73.26150691	3784.16761	136.3015	132.3899	126.3515	7.094391993	7.335739771	7.55021508
0.875182422	0.279856545	640.1624626	6042.433353	0.8365	5.21E-05	18958.51907	4.56E-05	16597.53384	1.46E-05	5305.79211	0.877833394	73.23142922	649.7403477	6481.578234	0.8858	0.022516553	18527.75254	0.000414913	16630.77158	73.02992696	3819.23538	0.861196495	0.341409692	619.5714635	5695.117719	0.8172	5.21E-05	18961.31718	4.49E-05	16335.22563	1.78E-05	6461.994983	0.873800615	73.70294218	643.9101443	6373.661365	0.8803	0.022656917	18521.97228	0.000417022	16549.71167	73.48620916	4115.737249	139.9907	137.5815	132.4789	4.154541312	3.655756796	3.808957179
0.867413	0.306966618	659.7822932	5854.002419	0.8268	5.55E-05	17812.74698	4.81E-05	15456.9307	1.71E-05	5446.29717	0.876471132	73.19952601	677.6531994	6458.471166	0.8861	0.022512189	17409.88037	0.000417609	15607.16331	73.00520209	3451.261821	0.859890893	0.339296655	648.5814238	5668.093984	0.8161	5.55E-05	17803.09876	4.77E-05	15306.9082	1.88E-05	6036.851611	0.872217177	73.90205011	669.0031891	6330.966743	0.878	0.022719379	17401.37517	0.000420804	15523.05228	73.67871399	3974.030182	136.221	133.2445	127.2753	3.649816297	3.527707435	3.681807968
0.866586734	0.327177743	456.6185154	5816.78666	0.8231	6.14E-05	16122.14494	5.32E-05	13971.99349	2.01E-05	5267.674402	0.864381602	74.78085033	461.5074317	6131.004148	0.8679	0.022988958	15748.83777	0.000429868	13925.18967	74.53613666	3953.721627	0.8541704	0.352237702	446.249661	5550.748736	0.8111	6.14E-05	16134.02564	5.24E-05	13791.69168	2.17E-05	5657.138824	0.865902475	74.59471264	463.7294253	6170.318621	0.87	0.022933612	15750.52103	0.000429049	13950.2576	74.35622152	3847.492644	129.3617	126.8239	121.9131	4.97675327	5.0101386	5.251452027
0.881303302	0.274928775	583.5106838	6182.931624	0.8424	4.78E-05	20717.68756	4.21E-05	18265.05024	1.31E-05	5694.783951	0.884388806	72.63937731	599.1281219	6648.801994	0.8929	0.022333625	20253.46041	0.000408424	18315.20414	72.44921953	3932.473513	0.871756767	0.294555943	576.8053119	5957.960942	0.8321	4.77E-05	20724.17017	4.16E-05	18073.48597	1.41E-05	6068.93258	0.882753415	72.59856711	597.9985447	6620.005038	0.8933	0.022323628	20261.3252	0.000408155	18293.52427	72.416778	3746.990932	145.5124	143.8554	140.0092	4.076744564	3.975335312	4.223400923
0.871600707	0.294018534	441.3430016	5947.726682	0.8309	5.58E-05	17790.00867	4.86E-05	15526.10179	1.65E-05	5184.946925	0.87672402	73.49733771	452.9501529	6442.602356	0.8827	0.022599035	17385.74159	0.000419326	15602.1567	73.28640592	3706.776141	0.858637025	0.352999017	430.8478368	5632.77237	0.8136	5.58E-05	17786.3616	4.79E-05	15286.23572	1.98E-05	6224.17355	0.877238486	73.24751581	453.7996838	6469.268293	0.8856	0.022525235	17380.29347	0.000418163	15604.28297	73.04642048	3559.75734	136.2446	132.8513	127.3177	5.761941586	6.131964474	6.350887081
0.876176582	0.269368296	615.0727056	6075.182122	0.839	4.76E-05	20783.2211	4.17E-05	18206.67779	1.28E-05	5609.035161	0.881328117	72.90378779	630.8172418	6571.011914	0.8897	0.02241359	20328.79634	0.000409421	18322.13418	72.70979907	4019.46038	0.868446299	0.306354192	609.3532254	5876.837159	0.8278	4.76E-05	20790.63349	4.13E-05	18056.83223	1.46E-05	6361.064025	0.8821122	72.82977768	632.2860993	6591.166854	0.8906	0.022391	20323.67954	0.000409102	18331.79134	72.63632178	4027.699978	146.0948	144.0582	139.9882	3.788853779	3.816832818	4.080179011
0.877243722	0.273550077	657.8352983	6097.183399	0.8397	4.80E-05	20614.78004	4.21E-05	18083.38054	1.31E-05	5646.701798	0.881050208	72.85263394	671.4045827	6569.180389	0.8903	0.022398885	20162.0757	0.000409492	18165.69995	72.66079772	3942.850612	0.870404642	0.313933832	647.0111084	5910.531273	0.8282	4.79E-05	20624.33265	4.17E-05	17956.31857	1.51E-05	6463.432021	0.880108595	73.00585256	669.6487338	6540.33686	0.8885	0.022444169	20159.57558	0.000410194	18145.3131	72.80800048	4077.626111	145.5249	143.4995	139.3273	3.588757444	3.561993789	3.863829022
0.875157863	0.28150006	743.5985907	6047.454795	0.8373	4.86E-05	20338.10582	4.25E-05	17805.46979	1.37E-05	5718.127553	0.8816402	72.83447501	758.8892757	6582.001011	0.8905	0.022394505	19883.46042	0.000410012	17928.09749	72.64447865	3854.058282	0.864878853	0.338371526	731.5397367	5772.591906	0.8204	4.86E-05	20335.87409	4.20E-05	17588.25001	1.65E-05	6858.616407	0.88096475	72.85913278	758.7119748	6567.188048	0.8902	0.022402058	19874.30971	0.000410142	17898.51788	72.66896004	3865.638171	144.958	142.514	137.9838	3.359707725	3.302484519	3.43830446
0.880939788	0.274023043	602.3336501	6173.654234	0.8419	7.05E-05	14066.16498	6.21E-05	12383.88452	1.91E-05	3892.348141	0.878512395	73.02521955	614.1029048	6508.922765	0.8882	0.022473721	13757.17147	0.00043004	12353.53358	72.83259617	2730.258613	0.867820865	0.318231375	589.5427014	5851.964506	0.8255	7.05E-05	14062.298	6.13E-05	12190.92551	2.22E-05	4512.206905	0.881929956	72.67279247	617.45697	6598.897131	0.8924	0.022368323	13751.50224	0.000428619	12389.37315	72.48981548	2601.715823	123.2112	117.0163	113.3104	4.922112815	4.961737025	4.947489448
0.874031254	0.27936774	615.4586277	6014.565082	0.8351	6.08E-05	16266.47515	5.31E-05	14218.52893	1.70E-05	4539.205963	0.877558016	73.37801154	620.0367605	6466.43106	0.8841	0.022568202	15888.96256	0.000423223	14251.65701	73.17035528	3389.578894	0.864697128	0.321025143	606.2100085	5788.672294	0.8233	6.08E-05	16256.65019	5.26E-05	14050.72708	1.95E-05	5230.166646	0.881008494	72.8865041	629.3301495	6565.996741	0.8899	0.022421483	15897.12541	0.000420976	14318.32008	72.69346039	3147.878413	130.9917	126.5925	123.7727	4.4163142	3.776803377	4.005675313
0.884404182	0.258235919	445.2706341	6265.687684	0.8469	6.87E-05	14867.26142	6.09E-05	13127.3011	1.72E-05	3919.537962	0.888039359	72.08749305	453.2236798	6760.052585	0.8995	0.022190681	14530.59622	0.00042482	13158.64758	71.91763216	2584.256253	0.87405728	0.287940542	436.2819468	6008.991609	0.8342	6.88E-05	14863.58823	6.03E-05	12964.19622	1.93E-05	4350.838528	0.888765582	72.02454737	456.2862379	6778.728757	0.9003	0.022171004	14534.30579	0.000424496	13176.99031	71.85372671	2602.749639	124.8576	121.0822	117.2076	11.05845931	10.23032957	9.512723177
0.883660362	0.239698611	436.4459619	6269.4502	0.8494	6.33E-05	15905.39581	5.60E-05	14037.69721	1.49E-05	3857.884154	0.889613768	72.01776988	446.9378054	6796.426033	0.9004	0.022163193	15549.18547	0.000419562	14119.75526	71.84574587	2782.524211	0.883268285	0.261625843	432.1974914	6234.590344	0.8451	6.33E-05	15888.03254	5.61E-05	14005.07426	1.61E-05	4241.08993	0.886042411	72.32902075	444.0374749	6703.058889	0.8966	0.022256851	15546.41423	0.000420863	14059.8474	72.15024527	2891.672987	130.9571	124.1892	120.8403	7.858286047	8.914572528	9.656344852
0.870009835	0.2988921	472.5151734	5918.965077	0.8304	6.53E-05	15269.72194	5.69E-05	13271.01067	1.93E-05	4603.368377	0.880501378	72.82663373	492.1704469	6560.552437	0.8906	0.022408317	14936.07736	0.00042466	13440.31764	72.63632486	2933.863126	0.874010763	0.307128261	478.2309172	5992.961293	0.8319	6.52E-05	15291.42782	5.70E-05	13367.99651	2.00E-05	4696.890972	0.882426459	72.74405563	495.3283984	6603.331763	0.8916	0.02238324	14939.82133	0.000424349	13474.25258	72.55485745	2908.586922	126.8249	122.8935	118.9811	7.412937339	6.610201037	6.603055565
0.872876621	0.275882705	680.9478157	5998.329025	0.8355	6.41E-05	15401.04117	5.59E-05	13445.58742	1.77E-05	4241.616876	0.879007352	73.34162333	691.2179516	6496.138368	0.8846	0.022558716	15050.50181	0.000425983	13528.30004	73.12899845	3278.877572	0.869492178	0.308779133	674.3024997	5895.424345	0.8281	6.41E-05	15397.41275	5.58E-05	13387.93269	1.98E-05	4757.607898	0.881390088	72.64512154	701.2984205	6590.619581	0.8927	0.022354596	15056.58004	0.000422763	13569.42438	72.46545343	2765.758485	128.6858	122.4974	118.969	3.42392733	3.663112507	3.657928239
0.874332073	0.284364158	662.7485345	6024.605694	0.8359	7.12E-05	13883.86494	6.23E-05	12128.59513	2.01E-05	3973.767077	0.876529712	73.4230421	670.3343142	6443.590539	0.8836	0.022591072	13574.37913	0.000432468	12160.83558	73.21176228	2957.647578	0.86315598	0.32036001	654.5273656	5758.037947	0.8222	7.12E-05	13879.25614	6.15E-05	11966.17607	2.26E-05	4483.644855	0.872157981	73.86361566	668.863388	6332.551913	0.8784	0.022724381	13572.69376	0.000434343	12099.3386	73.6451657	3051.988388	122.3801	116.3183	112.4741	3.933322259	4.27155535	4.33344311
0.877329939	0.262482168	716.1949596	6108.861626	0.8412	6.37E-05	15496.81895	5.59E-05	13598.99575	1.67E-05	4058.748573	0.879875381	73.07434944	725.7489017	6531.101611	0.8877	0.022479749	15148.59592	0.000424366	13631.41797	72.87361875	3103.70125	0.868068428	0.309134906	704.5426497	5862.465215	0.8265	6.37E-05	15493.75995	5.53E-05	13450.42307	1.97E-05	4785.62444	0.881551605	72.81856966	727.6619513	6581.233749	0.8907	0.022404248	15149.76636	0.000423231	13657.56764	72.62816977	2944.506456	128.8086	123.0648	118.518	3.408953804	3.35165645	3.581267373
0.868791001	0.297140789	740.9572928	5889.543371	0.8289	6.82E-05	14461.48703	5.93E-05	12564.49586	2.03E-05	4291.874412	0.873358399	73.78098704	755.1933136	6360.126905	0.8794	0.022695753	14132.38617	0.000431409	12621.8294	73.56142049	3170.864339	0.862207752	0.334147533	733.9631168	5720.829507	0.8188	6.82E-05	14458.58329	5.88E-05	12464.66674	2.28E-05	4830.564851	0.871874756	73.72803728	756.2424139	6336.878168	0.8799	0.022682887	14134.24923	0.000431081	12603.37897	73.51961873	3008.834413	124.4883	118.9697	114.5599	3.358133873	3.335473266	3.497801022
0.880113482	0.271172348	612.259532	6159.642594	0.8419	5.60E-05	17665.73394	4.93E-05	15546.90176	1.52E-05	4786.073881	0.885069034	72.48787303	625.8650944	6672.677657	0.8947	0.02229685	17268.95272	0.000415035	15621.92277	72.30346399	3257.25204	0.875845988	0.286295145	606.6658694	6051.231524	0.8362	5.60E-05	17659.08885	4.91E-05	15463.09638	1.60E-05	5070.366778	0.882918486	72.57251567	621.4362131	6625.101835	0.8936	0.022324209	17274.67905	0.00041533	15594.9541	72.39246756	3175.206804	137.7804	131.0151	128.541	4.048527614	4.275426527	4.357329343
0.883403706	0.266832328	435.7949355	6236.52692	0.8451	6.76E-05	14788.58608	5.98E-05	13051.19165	1.78E-05	3983.089812	0.880309461	72.99684898	444.4715282	6544.856628	0.8886	0.022460786	14471.38195	0.000427407	13024.43445	72.79981061	2937.47074	0.876505022	0.28206353	427.9820874	6070.002866	0.8374	6.77E-05	14771.47003	5.95E-05	12922.94996	1.86E-05	4243.585503	0.886586814	72.21269488	446.9478842	6722.052339	0.898	0.022226513	14453.33541	0.000424209	13080.12328	72.03776211	2631.342428	125.5085	120.4855	116.2232	7.216517702	7.168485876	7.585234456
0.887929754	0.24076463	488.0031664	6364.962003	0.8527	6.02E-05	16605.71549	5.35E-05	14728.63925	1.43E-05	4045.785036	0.885451041	72.32589784	493.7390141	6691.819094	0.8966	0.022253842	16235.59068	0.000418087	14678.47103	72.15024459	2956.311064	0.880246299	0.300871226	475.3661535	6135.431316	0.8379	6.03E-05	16592.08414	5.32E-05	14579.91817	1.77E-05	5070.47452	0.889509902	71.88248337	496.2492239	6803.990244	0.902	0.022120982	16236.73603	0.000416151	14745.8451	71.71830233	2773.164302	132.6769	127.9371	122.8337	7.189346729	7.1953279	8.464079649
0.875345569	0.281052002	640.7415421	6045.067663	0.8365	6.73E-05	14692.57071	5.89E-05	12860.78129	1.89E-05	4131.227974	0.877024494	73.32643834	653.2507065	6459.691308	0.8847	0.022559276	14356.70182	0.000428613	12872.30252	73.12073264	3036.913191	0.866920583	0.313317191	633.0041162	5841.108959	0.826	6.73E-05	14692.52676	5.83E-05	12737.21214	2.10E-05	4607.002542	0.874658801	73.64199773	652.4980704	6393.793417	0.881	0.022653717	14359.68854	0.000429976	12844.07051	73.42782367	3152.852213	125.9038	119.5213	116.0437	4.072805613	4.129569749	4.139660652
0.880935237	0.253756063	537.8557908	6195.961079	0.8453	6.04E-05	16467.96841	5.33E-05	14497.77528	1.52E-05	4193.665444	0.885772928	72.25830176	550.1100958	6703.032984	0.8974	0.022234283	16099.21495	0.000417953	14567.56282	72.08592515	2863.79318	0.87682515	0.282045156	533.6360053	6073.507705	0.8371	6.05E-05	16456.7999	5.31E-05	14412.81227	1.68E-05	4681.373671	0.879034793	73.12354864	542.4870928	6511.734754	0.8871	0.022491763	16088.39669	0.000421812	14445.46368	72.92290677	3339.699019	132.8329	126.7605	123.3683	5.668260544	6.347325401	6.848434501
0.879511829	0.264032277	691.6744986	6154.759108	0.8427	6.12E-05	16149.15545	5.38E-05	14208.05058	1.62E-05	4257.545864	0.878279214	73.02229228	700.3391128	6504.807926	0.8882	0.022464673	15779.89619	0.000421868	14168.97208	72.83259434	3064.866472	0.864647168	0.315846995	678.3624772	5789.188221	0.8235	6.11E-05	16150.86995	5.29E-05	13967.21934	1.94E-05	5073.091196	0.879944286	72.9439946	699.1603689	6541.651822	0.8892	0.022439479	15780.39069	0.000421558	14195.96949	72.75068656	3123.858749	131.2816	125.6718	123.0776	3.594287334	3.590332124	3.796205769
0.873177762	0.281946775	510.3035243	5994.718293	0.8342	6.34E-05	15625.19192	5.54E-05	13645.14201	1.79E-05	4401.540997	0.879871285	72.97839784	520.319757	6537.819532	0.8888	0.022451747	15273.51035	0.000423695	13740.20559	72.78342822	3039.130738	0.870262389	0.331396053	503.0128345	5893.152561	0.8259	6.35E-05	15613.8834	5.53E-05	13582.58594	2.09E-05	5194.47645	0.883026285	72.66857143	524.9065546	6620.239216	0.8925	0.022358927	15276.22095	0.000422354	13793.23758	72.4816925	2919.245042	128.3188	124.3218	120.1074	5.205340196	4.911989898	5.766356323
0.87313953	0.273836583	699.2232324	6005.28257	0.8359	6.24E-05	15810.8501	5.45E-05	13806.90188	1.71E-05	4323.880129	0.87999542	73.02138917	713.763706	6537.188225	0.8883	0.02246339	15452.25735	0.000423045	13902.02954	72.82439593	3118.290668	0.8713652	0.292548077	692.6259615	5951.029087	0.832	6.24E-05	15809.8125	5.44E-05	13777.03645	1.83E-05	4623.254567	0.879527875	72.8882895	713.0038211	6537.870982	0.8898	0.022425599	15460.15374	0.000422351	13906.32146	72.70163002	2943.081816	129.5704	124.8032	120.925	3.270480674	3.515034816	3.47864557
0.882760169	0.251091961	373.8936371	6238.887853	0.8471	6.08E-05	16376.67312	5.36E-05	14470.15078	1.54E-05	4081.95821	0.884047751	72.63848135	380.3013775	6642.164296	0.8929	0.022346383	16009.0915	0.000419927	14475.73259	72.44922208	3058.337328	0.869323788	0.301882239	365.8180502	5897.38417	0.8288	6.08E-05	16369.25458	5.29E-05	14235.00081	1.85E-05	4909.081081	0.882794423	72.56294058	381.6836746	6623.443102	0.8937	0.022326416	16012.98445	0.000419478	14465.01194	72.38436812	2895.978292	132.007	126.4564	122.601	6.127377171	7.181385593	7.571948164
0.876586124	0.271123823	612.6822786	6082.741151	0.8391	6.29E-05	15794.42939	5.52E-05	13839.5539	1.69E-05	4312.293767	0.879915116	72.90759892	629.9204137	6543.767311	0.8896	0.022431055	15446.10241	0.000422888	13893.1817	72.71797494	3009.39692	0.871678341	0.289145053	608.7716138	5961.309078	0.8328	6.28E-05	15801.32349	5.48E-05	13769.64145	1.81E-05	4569.548751	0.881603487	72.77112083	627.1689667	6585.414451	0.8913	0.022388379	15448.0616	0.000422272	13921.66257	72.57927821	3042.053742	129.4634	124.6802	121.1626	5.822719334	5.148041177	5.428421616
0.868621158	0.276135544	549.7185773	5909.024273	0.8322	6.69E-05	14840.63302	5.81E-05	12885.9665	1.84E-05	4102.527397	0.883699287	72.54983779	569.5759033	6641.812843	0.8939	0.022327384	14506.65499	0.000424917	13099.12716	72.36817406	2704.558228	0.872823701	0.295899964	545.624504	5972.697968	0.8317	6.69E-05	14833.71396	5.84E-05	12941.24691	1.96E-05	4422.686786	0.881107263	72.75723581	566.9041956	6577.079426	0.8914	0.022389803	14507.57965	0.000425742	13065.03785	72.57113643	2773.683195	126.0359	120.4469	115.9205	5.148321201	5.611753771	5.40146089
0.877454216	0.280362682	654.036984	6091.019327	0.8382	5.70E-05	17329.96254	5.00E-05	15207.93194	1.60E-05	4849.581961	0.887287332	72.15433404	671.1742517	6740.151441	0.8987	0.022198843	16946.23801	0.000414404	15372.75757	71.98165	2988.078669	0.876802464	0.263182954	654.1005833	6092.845257	0.8401	5.70E-05	17327.78157	5.00E-05	15195.27525	1.50E-05	4561.753006	0.882252258	72.71098655	669.7807175	6602.175336	0.892	0.022365154	16943.29753	0.00041685	15284.82287	72.52232019	3261.993946	135.7048	130.4216	127.3355	3.616580838	3.643192754	3.801965248
0.879112903	0.251984362	631.5501718	6157.614382	0.8441	5.61E-05	17619.38692	4.94E-05	15485.62701	1.41E-05	4442.15792	0.885810933	72.38877107	645.8753209	6694.176247	0.8959	0.02226718	17232.00123	0.000414681	15605.42231	72.20661808	3214.932805	0.871990696	0.281227523	624.1714217	5975.681611	0.8342	5.61E-05	17621.003	4.90E-05	15363.47648	1.58E-05	4963.166747	0.882422598	72.80761028	638.3117073	6598.469301	0.8909	0.022391875	17218.50275	0.000416603	15527.42064	72.61186408	3472.660792	136.7762	131.5001	128.8774	4.136026301	4.18707535	4.392057518
0.874373288	0.288484558	487.2477855	6021.905913	0.8354	6.76E-05	14648.8481	5.91E-05	12806.80117	1.93E-05	4256.526095	0.883711711	72.49983231	504.3044159	6645.494802	0.8945	0.022313106	14327.05925	0.000425231	12942.02537	72.31963202	2648.739296	0.872121209	0.293849111	487.1119654	5965.755406	0.8324	6.75E-05	14660.29901	5.89E-05	12785.48365	1.99E-05	4285.478976	0.884588794	72.64919355	503.608647	6651.975358	0.8928	0.022355455	14328.2985	0.00042598	12956.41439	72.45733822	2809.101366	125.3573	119.6374	116.2134	4.670592758	4.782501567	5.328326233
0.874583649	0.301678657	480.6347722	6015.819185	0.834	6.93E-05	14289.97782	6.06E-05	12502.3949	2.09E-05	4295.977458	0.880985217	72.93792871	494.8277297	6561.958732	0.8893	0.022444928	13967.0804	0.000428746	12582.70941	72.74250766	2783.552569	0.865485419	0.322235723	473.4658566	5799.031835	0.823	6.94E-05	14281.2305	6.01E-05	12355.56879	2.24E-05	4591.930741	0.876242318	73.38506787	491.5963801	6440.974661	0.884	0.022579113	13958.66403	0.000430671	12505.04887	73.17863418	2951.824774	124.164	117.8027	113.8252	4.727145439	5.231421672	5.778221609
0.88138731	0.259118901	550.1688773	6197.721696	0.8444	6.82E-05	14511.13145	6.01E-05	12785.85466	1.76E-05	3773.411772	0.891808909	71.79858266	574.890599	6856.267855	0.9031	0.022101865	14194.99779	0.000422848	12936.92615	71.63094928	2435.852729	0.880300841	0.262009252	554.8313367	6170.877357	0.8431	6.81E-05	14518.0255	6.00E-05	12780.69081	1.78E-05	3802.280157	0.886445037	72.27819884	565.5617477	6714.727151	0.8972	0.022246775	14190.30294	0.000424891	12854.2713	72.10199591	2562.043134	124.1005	119.5747	115.9371	4.403725667	4.583057921	4.830066624
0.881629014	0.26009234	675.8305907	6203.735883	0.8447	5.46E-05	18103.72239	4.81E-05	15961.46906	1.42E-05	4706.735409	0.88680975	72.24509804	689.8509358	6724.325312	0.8976	0.022223587	17704.84381	0.000412654	16052.9795	72.06986251	3168.855281	0.883179042	0.265088757	669.4068639	6232.092071	0.845	5.46E-05	18105.96497	4.82E-05	15991.69542	1.45E-05	4787.442959	0.885709893	72.42110553	686.9718593	6690.08029	0.8955	0.022275573	17704.59966	0.000413447	16033.51565	72.23887093	3292.063987	138.4896	133.4082	130.6463	3.399866444	3.667502251	3.525137772
0.87554483	0.278661088	620.0240287	6048.494561	0.8365	6.42E-05	15382.27137	5.62E-05	13469.51707	1.80E-05	4272.438733	0.881683133	72.89010001	631.7737948	6578.561749	0.8899	0.02242489	15033.47331	0.000424087	13551.32197	72.69346133	3024.063715	0.868384697	0.31429954	605.8255504	5868.048875	0.8266	6.42E-05	15387.12642	5.58E-05	13368.39767	2.02E-05	4816.40346	0.882201122	72.60479176	629.7541424	6608.975817	0.8932	0.022342263	15038.48735	0.000422738	13565.62346	72.42488842	2761.876511	128.7305	122.2917	119.1195	4.083022134	4.064161797	4.489300586
0.884164508	0.243994348	619.2381065	6276.670749	0.8492	6.71E-05	14721.66945	5.94E-05	13014.66847	1.63E-05	3603.913448	0.890913362	71.92125111	632.7755102	6829.451863	0.9016	0.022137546	14395.03006	0.000422511	13104.29041	71.75012235	2526.180235	0.876941601	0.268571429	612.9292857	6094.472381	0.84	6.71E-05	14724.62821	5.89E-05	12911.23757	1.80E-05	3952.676071	0.882729305	72.61639234	626.2077035	6618.217781	0.8931	0.022347563	14399.88299	0.000425359	12995.66745	72.43299856	2691.115329	125.0812	120.3353	116.7372	4.071167715	4.256556579	4.31083938
0.872666463	0.271857433	719.1896902	5998.945461	0.8361	7.25E-05	13614.28477	6.33E-05	11876.40061	1.97E-05	3704.434757	0.877642479	73.19408711	734.1647484	6480.734823	0.8862	0.022526235	13313.04017	0.00043253	11947.19991	72.99696756	2681.32724	0.866237898	0.328958561	706.0314741	5810.372706	0.8229	7.24E-05	13617.43395	6.28E-05	11795.67315	2.38E-05	4483.013975	0.877568088	73.29171845	732.1295899	6472.375664	0.8851	0.022554141	13312.35454	0.000432979	11946.83607	73.08768846	2780.966896	122.4775	114.4291	110.0052	3.475297649	3.469462954	3.543356172
0.885207253	0.248821866	728.0652686	6292.13525	0.8488	5.22E-05	18936.7017	4.62E-05	16764.01498	1.30E-05	4713.505891	0.891625624	71.84963989	739.4627147	6848.700388	0.9025	0.022100879	18520.51668	0.000408808	16880.03931	71.67856849	3233.749917	0.878549787	0.274589188	718.8549655	6119.785901	0.8398	5.21E-05	18946.0855	4.58E-05	16651.7623	1.44E-05	5180.843534	0.887472597	72.24888592	732.8270945	6737.02607	0.8976	0.02222126	18512.41867	0.000410593	16792.76227	72.06986225	3398.687166	141.0484	136.6993	134.1087	3.35536249	3.37870974	3.606173084
0.893117914	0.233997901	282.8393378	6490.205083	0.8577	7.68E-05	13251.30908	6.88E-05	11802.6959	1.74E-05	3180.476624	0.894893136	71.45828282	288.589331	6943.865425	0.9073	0.022008237	12979.4466	0.000429154	11855.95932	71.29936149	2157.551747	0.881332973	0.265228727	277.0447973	6192.728372	0.8438	7.66E-05	13276.21225	6.76E-05	11689.92863	1.99E-05	3570.201825	0.890348467	71.68421053	289.6853162	6835.246793	0.9044	0.022078556	12972.27421	0.000429959	11784.48607	71.52798594	2127.070323	118.5564	114.1268	109.4608	10.46386253	9.906741228	10.69839536
0.874729679	0.281272423	495.3642669	6032.934226	0.8362	7.02E-05	14093.90289	6.15E-05	12323.33842	1.96E-05	3980.196006	0.880496459	72.99887463	510.6374072	6548.165654	0.8886	0.022463386	13784.60173	0.000429755	12409.95787	72.79981138	2807.480981	0.869766752	0.320914479	491.9304464	5890.619451	0.8267	7.03E-05	14085.62828	6.12E-05	12239.78944	2.24E-05	4550.344018	0.881314396	72.88627936	510.2214856	6571.978986	0.8899	0.022430696	13780.58995	0.000429305	12415.83566	72.69346215	2732.686257	124.1757	116.7513	112.3853	4.119129703	4.897310314	5.712428898
0.880693113	0.254823056	560.1544561	6189.323115	0.8449	6.08E-05	16274.71559	5.35E-05	14344.20059	1.55E-05	4127.100604	0.883553402	72.57676813	574.5564011	6636.895479	0.8936	0.022328932	15898.48042	0.000419634	14361.14834	72.39246868	2996.103178	0.86952924	0.292615348	554.4969281	5909.179978	0.8301	6.08E-05	16256.96121	5.29E-05	14131.53936	1.78E-05	4758.186002	0.881874938	72.86519883	566.1801842	6583.960683	0.8902	0.022413974	15900.23669	0.000420921	14337.75253	72.66896275	3182.698719	131.5075	126.3626	122.2262	4.068506329	4.494565745	4.881171331
0.891580611	0.231271879	316.5803967	6457.927188	0.857	8.01E-05	13021.43291	7.15E-05	11595.46195	1.84E-05	3031.873746	0.896529354	71.45002755	328.5047934	6978.075482	0.9075	0.022006642	12743.85741	0.000432082	11668.43278	71.28364973	2169.046391	0.877773197	0.253529482	319.0616918	6127.566615	0.8429	7.96E-05	13073.99858	6.96E-05	11500.7794	2.09E-05	3244.178432	0.890763936	71.81856447	326.8289765	6833.943288	0.9028	0.022120929	12729.57477	0.000433674	11577.50544	71.65475358	2176.130151	116.7155	112.9921	108.7501	13.34349878	12.36595478	12.39499294
0.87012234	0.28604064	487.3799447	5929.318384	0.8317	6.58E-05	15035.7528	5.73E-05	13083.40944	1.88E-05	4294.497054	0.880357503	72.90064067	505.9697651	6552.653366	0.8897	0.02243142	14704.51647	0.000425414	13240.6328	72.70980242	2858.343374	0.86618283	0.316428051	479.6318855	5817.747149	0.8242	6.58E-05	15036.8049	5.70E-05	13026.32131	2.08E-05	4755.705654	0.879896471	72.93343079	503.315754	6541.578432	0.8893	0.02244149	14702.57607	0.000425568	13230.14358	72.74250669	2860.514899	127.4448	120.7826	117.205	4.245933697	5.093695833	5.573703885
0.879360493	0.26168446	667.0749703	6154.406168	0.843	5.67E-05	17449.60356	4.98E-05	15345.13929	1.48E-05	4563.198339	0.887660235	72.16403294	681.7471623	6746.833741	0.8986	0.022200977	17060.55898	0.000414177	15480.12555	71.98966042	3047.286557	0.871865799	0.288046087	656.2400384	5966.886222	0.8332	5.66E-05	17454.0204	4.94E-05	15220.83088	1.63E-05	5016.449832	0.886295456	72.31311329	677.7598127	6709.180196	0.8968	0.022245435	17057.10861	0.000414848	15451.95235	72.13415372	3131.557315	136.1354	130.8624	127.9574	4.04354632	4.047970632	4.0973388
0.87696063	0.271210677	421.3057674	6089.517159	0.8392	7.11E-05	13987.4428	6.24E-05	12255.58181	1.91E-05	3814.787893	0.878640505	72.97232223	435.3937894	6515.156166	0.8888	0.022459205	13673.74539	0.000430381	12272.59508	72.78342913	2659.409203	0.865946996	0.308130377	417.0026657	5821.319884	0.8253	7.10E-05	13992.15219	6.16E-05	12110.38695	2.17E-05	4331.908639	0.877820777	73.10030429	432.6325933	6490.642962	0.8873	0.022497046	13674.47436	0.000430927	12264.90771	72.90647141	2734.496675	122.4238	117.06	112.1468	5.611576745	6.194949556	6.69014572
0.876400267	0.266730174	731.2829245	6084.241248	0.8398	6.08E-05	16238.13289	5.33E-05	14236.33095	1.62E-05	4324.527387	0.886266828	72.42534897	748.6040201	6700.528532	0.8955	0.022281667	15874.93389	0.000418999	14385.71667	72.23887232	3021.585036	0.867613841	0.295992274	722.9031869	5867.799614	0.8284	6.08E-05	16229.59488	5.28E-05	14078.72533	1.80E-05	4805.556132	0.880036958	72.97907291	744.3854635	6540.890189	0.8888	0.02244917	15872.94847	0.000421367	14285.75179	72.78342775	3169.604523	131.5197	126.2057	122.6219	3.363422648	3.219252632	3.435511663
0.879551894	0.266270784	685.5477435	6150.962233	0.842	5.41E-05	18265.86378	4.76E-05	16070.08014	1.44E-05	4848.793112	0.885998775	72.4226689	699.9445003	6695.609269	0.8955	0.02227512	17855.35768	0.000413054	16174.82106	72.23887091	3355.614852	0.873627024	0.285234899	676.2567114	6003.222196	0.8344	5.41E-05	18263.85846	4.73E-05	15958.70268	1.54E-05	5199.222196	0.880561901	73.17482517	695.0002256	6537.047598	0.8866	0.022498189	17848.83081	0.000416434	16071.96249	72.96403124	3853.614144	139.1133	133.9897	131.0867	3.372515843	3.56552856	3.438630994
0.882000585	0.258075967	693.8335108	6212.737309	0.8451	6.14E-05	16088.46847	5.41E-05	14191.26351	1.58E-05	4155.093125	0.887801231	72.18143366	709.5601069	6748.418967	0.8984	0.022210485	15737.00701	0.000418401	14286.55361	72.00568756	2822.416296	0.871464343	0.300036105	677.0336984	5945.329522	0.8309	6.14E-05	16092.47671	5.35E-05	14025.50517	1.85E-05	4812.966181	0.885580754	72.40381824	705.0899855	6688.705705	0.8957	0.022277276	15729.69476	0.000419404	14240.04487	72.22274192	2914.200179	131.4732	125.2041	120.6711	3.409264108	3.619342922	3.748589707
0.891919545	0.221187427	500.4549476	6477.19092	0.859	6.09E-05	16270.17544	5.43E-05	14519.44741	1.35E-05	3576.111292	0.89183727	71.95040497	505.7005437	6846.088872	0.9013	0.022138802	15902.00865	0.000417115	14497.15523	71.77400387	2861.582936	0.873883365	0.28740865	483.2599736	6009.503175	0.8347	6.09E-05	16267.32826	5.32E-05	14221.01872	1.76E-05	4651.403378	0.880814129	72.72860828	502.3033531	6573.671078	0.8917	0.022376477	15900.53729	0.000420322	14323.17748	72.54671963	2951.29797	132.6735	126.0511	118.9527	4.956601431	5.099871448	5.338001753
0.885463105	0.249558356	526.7477329	6298.40855	0.8491	5.91E-05	16764.51608	5.23E-05	14850.38691	1.48E-05	4156.65858	0.894146645	71.39669604	543.7504405	6933.13304	0.908	0.021974085	16389.34659	0.000412925	14977.97824	71.24439226	2547.726101	0.88074731	0.274109264	523.1451306	6170.912114	0.842	5.90E-05	16765.78765	5.20E-05	14772.48157	1.63E-05	4560.825178	0.883311561	72.56696878	534.7547275	6632.960837	0.8937	0.022324734	16386.60177	0.000418029	14801.64628	72.38436798	3048.938122	134.7348	127.6038	121.6462	4.748965041	4.792455066	4.883669272
0.899680039	0.202442678	369.6530706	6677.95034	0.8679	5.72E-05	17391.50559	5.15E-05	15658.69294	1.17E-05	3495.465376	0.90215647	70.75897828	380.4251719	7147.498636	0.9161	0.021778554	16998.89936	0.000408588	15670.3926	70.61446085	2511.730815	0.88705686	0.25951231	360.5542467	6324.750736	0.8489	5.72E-05	17399.81906	5.07E-05	15449.29117	1.50E-05	4459.916245	0.890558839	71.94707645	373.6326417	6820.1459	0.9013	0.022135211	17000.63431	0.000413755	15479.37928	71.7740031	2984.017974	136.8815	130.0253	123.7763	6.670371635	6.899540558	7.298113339
0.88787405	0.24823861	558.669798	6356.609206	0.8516	5.58E-05	17721.9892	4.96E-05	15737.78296	1.39E-05	4388.143495	0.888181287	72.0993996	569.6466533	6761.714921	0.8994	0.02218043	17335.8847	0.000413085	15747.11273	71.92562682	3062.715032	0.880047774	0.270957017	554.573498	6160.479221	0.8422	5.58E-05	17728.25813	4.91E-05	15609.42672	1.52E-05	4782.042508	0.892771279	71.7348158	572.9710145	6880.466091	0.9039	0.022070303	17331.60471	0.000411562	15818.35632	71.56755	2958.065383	137.9116	131.3246	126.3626	4.247774175	4.375618224	4.507163325
0.896634413	0.206235566	558.0829099	6608.498845	0.866	4.69E-05	21093.41963	4.21E-05	18913.32969	9.68E-06	4345.033718	0.893726649	71.37855098	563.8881304	6925.911253	0.9082	0.021957398	20626.82416	0.000401995	18837.6995	71.22870113	3167.355098	0.8912314	0.224941725	554.5862471	6458.230536	0.858	4.69E-05	21100.03159	4.18E-05	18811.54715	1.06E-05	4735.734615	0.894318005	71.66556145	558.6655615	6917.204686	0.9048	0.022039714	20633.63019	0.000403345	18864.52812	71.49636073	3563.499116	148.2063	144.8249	140.4049	4.284476667	4.622168321	4.578750483
0.895932147	0.204579623	456.1349601	6587.531283	0.8647	5.26E-05	18855.374	4.71E-05	16899.42048	1.08E-05	3850.922054	0.898588476	71.04932047	464.017317	7050.498904	0.9124	0.021862049	18445.66221	0.00040561	16941.61725	70.9008189	2780.278825	0.886508789	0.237413449	446.4179087	6336.243281	0.8521	5.26E-05	18863.20561	4.66E-05	16730.10184	1.26E-05	4441.218519	0.896317966	71.17281511	464.4119455	6994.183575	0.9108	0.021900353	18447.69521	0.000406101	16904.91993	71.02537011	2763.958059	141.6513	135.7921	130.8858	5.241021686	5.49081757	5.708533819
0.90324416	0.199908246	385.2486524	6770.703406	0.8719	5.39E-05	18430.15071	4.87E-05	16650.58497	1.08E-05	3668.023971	0.900064999	70.82583042	389.6284965	7097.894449	0.9152	0.021796645	18029.65712	0.000405807	16585.28271	70.68390192	2600.026552	0.889290311	0.224194302	377.9406819	6413.428305	0.8564	5.39E-05	18431.52791	4.79E-05	16398.44822	1.21E-05	4126.030827	0.900047663	70.81645362	390.1318693	7098.405441	0.9153	0.021794278	18026.88528	0.000405776	16581.86795	70.67617933	2577.175789	140.7114	133.8239	128.3795	5.983837401	6.632668301	6.464292672
0.893865236	0.212993039	618.4153132	6531.924594	0.862	5.06E-05	19553.07842	4.52E-05	17475.14771	1.08E-05	4168.672854	0.893529527	71.46119929	624.4863316	6915.791005	0.9072	0.021985105	19124.39242	0.00040563	17461.75104	71.30721677	3013.207451	0.889783926	0.24645494	608.3678659	6401.491269	0.8533	5.06E-05	19558.23989	4.50E-05	17403.47144	1.25E-05	4813.471112	0.897049512	71.20891916	628.8484183	7006.660589	0.9104	0.02190801	19123.87522	0.000404546	17528.33315	71.05657622	2988.31964	143.6551	138.9122	134.7398	3.965544602	4.077265157	4.108904472
0.895799498	0.226892708	480.6353925	6561.673247	0.8612	5.31E-05	18664.52729	4.75E-05	16724.53191	1.21E-05	4220.570135	0.892995811	71.64375691	484.0848619	6891.518232	0.905	0.02204089	18247.5442	0.000408721	16655.35571	71.48056114	3044.616354	0.887355933	0.253762935	471.7471778	6339.576199	0.8504	5.31E-05	18662.37359	4.71E-05	16561.13258	1.35E-05	4709.886877	0.889986447	71.81524147	485.6078866	6818.610102	0.9028	0.022094451	18253.12517	0.00040941	16609.12924	71.65474935	2982.250665	140.812	135.2263	130.5344	5.01330789	5.001588579	5.182163317
0.897052487	0.208689623	589.7614976	6612.300208	0.8654	4.64E-05	21329.31939	4.17E-05	19135.2326	9.71E-06	4436.992258	0.899179537	70.91116946	598.4659228	7073.213106	0.9141	0.021815469	20865.34329	0.000399447	19174.68433	70.76895969	3023.999781	0.888529013	0.248856037	580.3680629	6372.57292	0.8523	4.64E-05	21322.75103	4.13E-05	18945.62592	1.15E-05	5315.159451	0.901207382	70.83673915	601.9786909	7121.641241	0.9151	0.021791682	20864.86395	0.000399149	19217.76992	70.69162514	3091.513387	149.1487	145.5929	140.6011	4.42711964	4.711854156	4.823772257
0.891163742	0.229978987	634.8729862	6448.021947	0.8566	5.07E-05	19515.29103	4.52E-05	17393.80311	1.16E-05	4497.885127	0.896398755	71.39907499	645.222002	6979.017399	0.9081	0.021963436	19094.81346	0.00040546	17498.81594	71.23654608	3162.053518	0.883114902	0.241102993	626.0544426	6254.890408	0.8486	5.07E-05	19514.55786	4.48E-05	17235.10826	1.22E-05	4711.643531	0.894856999	71.36569793	642.8172611	6950.017393	0.9084	0.021956222	19086.61438	0.000405303	17454.27378	71.21301962	2978.703214	143.7449	138.5512	134.3148	3.902386961	4.007365539	4.113429343
0.893911486	0.213647441	543.8253452	6530.902518	0.8617	4.81E-05	20603.31507	4.30E-05	18421.4774	1.03E-05	4388.006847	0.897145332	71.22456603	549.2050099	7007.835641	0.9102	0.021910335	20152.68446	0.000402342	18480.24172	71.07218928	3128.535377	0.890376864	0.236325386	538.1736793	6427.067789	0.8556	4.81E-05	20602.91503	4.28E-05	18349.18464	1.14E-05	4860.253857	0.898265291	71.09738978	553.0315859	7040.334723	0.9118	0.021871981	20149.31027	0.000401779	18496.65188	70.94747376	3082.208598	147.1734	142.7064	138.0947	4.52129765	4.543038525	4.653872786
0.885074242	0.234257519	491.2894737	6305.656015	0.8512	5.38E-05	18392.49589	4.76E-05	16283.49486	1.26E-05	4297.321311	0.891654129	71.82521046	502.7352681	6850.937306	0.9028	0.022095223	17977.33274	0.000410223	16381.50679	71.65474996	3139.814134	0.882680632	0.252508559	491.1062448	6237.288986	0.8471	5.39E-05	18387.26514	4.75E-05	16230.19433	1.36E-05	4637.887026	0.889293701	71.87373905	501.7690943	6800.307837	0.9021	0.022112316	17980.39508	0.000410358	16344.71009	71.71035132	3007.687839	140.0432	134.108	128.9944	4.501192482	5.056019778	4.942324214
0.901173347	0.203682394	326.370771	6713.040276	0.869	4.97E-05	20068.41738	4.48E-05	18083.82881	1.01E-05	4079.835558	0.897960776	71.08794824	332.4499397	7034.596228	0.9119	0.021871192	19623.02709	0.000403211	18002.20172	70.93969369	2988.845487	0.88988848	0.229295643	323.0390141	6421.867889	0.8561	4.97E-05	20076.81626	4.42E-05	17872.10518	1.14E-05	4580.253008	0.891356178	71.7983612	328.1507031	6846.95593	0.9031	0.022083828	19618.54667	0.000406375	17871.18691	71.63094613	3382.625291	144.6754	141.1436	136.4718	7.261434765	7.573254191	7.88677404
0.900742465	0.199954007	314.5662872	6709.214787	0.8697	5.20E-05	19195.80327	4.68E-05	17299.42577	1.04E-05	3817.827987	0.902624075	70.62017869	323.733711	7168.209414	0.9178	0.021733116	18776.81728	0.000403139	17323.90128	70.48366369	2606.173022	0.888314403	0.232786885	311.3503513	6380.432553	0.854	5.20E-05	19192.93431	4.61E-05	17057.11619	1.21E-05	4453.290398	0.893630122	71.62991604	318.5251878	6905.369421	0.9052	0.022034896	18775.97669	0.000407614	17158.47905	71.46476781	3145.529828	142.8951	137.0643	131.6849	6.999663991	7.769038905	8.252430672
0.892903855	0.240074731	440.6588043	6477.848669	0.8564	5.16E-05	19233.45353	4.60E-05	17184.71519	1.24E-05	4595.384867	0.89704346	71.19989017	455.9605711	7007.345085	0.9105	0.021906575	18807.05601	0.000405372	17245.08812	71.04877226	2886.250082	0.888255866	0.252791162	436.2429193	6358.858268	0.8509	5.15E-05	19241.0751	4.58E-05	17103.52984	1.32E-05	4809.071806	0.894205311	71.49757389	451.2093075	6926.878253	0.9068	0.021995769	18799.20776	0.000406713	17183.59094	71.33867161	3056.867446	142.4286	137.6237	132.9785	5.20936676	5.652724857	5.750881476
0.890913626	0.228561428	442.9764322	6446.615681	0.8571	5.42E-05	18289.85078	4.83E-05	16301.68146	1.24E-05	4161.963482	0.889411656	71.89798181	449.5269461	6801.028831	0.9018	0.022120007	17885.59559	0.000410789	16267.14924	71.73420718	2981.336993	0.882506282	0.264740706	434.9088326	6217.935117	0.8446	5.42E-05	18290.41878	4.78E-05	16146.36905	1.44E-05	4805.93784	0.894204142	71.36393659	454.5424923	6936.678336	0.9084	0.0219597	17883.83851	0.00040843	16348.6232	71.21302006	2759.784566	140.0646	133.2968	129.2466	5.316693224	5.551658289	5.741514473
0.894531836	0.215504236	522.4285714	6542.220843	0.8617	4.91E-05	20175.28293	4.39E-05	18049.70913	1.06E-05	4328.725775	0.895564951	71.3024637	527.0072591	6969.119666	0.9092	0.021935398	19732.34668	0.000403591	18063.48114	71.15035943	3064.218544	0.884262565	0.246612466	509.1088724	6275.144456	0.8487	4.91E-05	20169.53882	4.34E-05	17834.40841	1.21E-05	4969.991634	0.888527701	71.96293008	521.0350721	6778.659046	0.901	0.022134587	19727.86915	0.000406521	17921.11108	71.79789934	3324.766482	145.4079	141.45	136.9581	4.617003096	4.864267674	4.80565754
0.898091002	0.204474686	528.0773844	6642.605351	0.8671	4.69E-05	21144.23896	4.21E-05	18988.17442	9.58E-06	4320.109445	0.892032051	71.63109049	532.6959452	6872.965529	0.9051	0.022032356	20675.23224	0.000403072	18846.21579	71.47266235	3357.344824	0.889044762	0.231146966	523.5876301	6401.675085	0.8553	4.68E-05	21151.65673	4.16E-05	18811.04575	1.08E-05	4880.741377	0.890497788	72.06478498	525.2773642	6810.779976	0.8999	0.022159373	20683.99878	0.000405046	18833.7512	71.88566235	3781.893988	148.2591	145.1123	140.526	4.636374358	4.846719376	4.943068278
0.893734986	0.206580929	304.5757154	6536.985633	0.8631	5.74E-05	17443.91565	5.12E-05	15619.47818	1.20E-05	3552.4244	0.902202061	70.69200567	313.2811648	7153.876213	0.9169	0.021759736	17057.82768	0.000408337	15746.61588	70.55284919	2389.151598	0.885280033	0.2456161	299.5533718	6299.169001	0.8497	5.74E-05	17436.10145	5.08E-05	15458.65126	1.42E-05	4242.204425	0.890696045	71.81072101	308.9288958	6832.986709	0.9029	0.022096246	17050.84805	0.000413215	15542.12689	71.64681429	2811.762986	136.6637	130.0507	124.5565	8.096357348	8.766808399	8.767759563
0.880838741	0.267181009	533.7067062	6176.06089	0.8425	6.20E-05	15946.9511	5.46E-05	14051.74866	1.67E-05	4237.857567	0.881071147	72.57425853	544.1346391	6589.75859	0.8935	0.022332616	15593.14773	0.000420573	14052.5801	72.40057043	2752.660101	0.868513675	0.314929168	521.4138516	5865.589418	0.8259	6.20E-05	15952.69391	5.38E-05	13864.74659	1.96E-05	4989.502119	0.8855727	72.44682752	544.5055853	6685.508266	0.8952	0.022290347	15588.23939	0.000420189	14116.76833	72.26308111	2924.798481	131.3727	124.2435	119.9953	4.514398599	4.608926963	4.85786763
0.879367932	0.259549229	651.9976275	6154.498695	0.843	5.30E-05	18650.54437	4.66E-05	16407.10234	1.38E-05	4829.19134	0.885396407	72.4370602	665.6625712	6682.760751	0.8953	0.022279033	18227.33151	0.000412161	16497.75581	72.25500797	3394.155144	0.871889143	0.304588703	640.9641094	5948.175479	0.8303	5.30E-05	18643.27604	4.62E-05	16255.09239	1.61E-05	5674.911839	0.88552164	72.41268423	663.9669495	6686.863555	0.8956	0.022271585	18228.56342	0.000412041	16501.71178	72.23080464	3387.364225	141.4714	134.6946	132.2146	3.806833598	3.775543781	3.746591363
0.876024212	0.268978668	448.4270051	6073.379454	0.8391	6.19E-05	16003.85163	5.42E-05	14031.47435	1.68E-05	4265.224407	0.875662723	73.26567265	457.2087428	6438.86513	0.8853	0.022538812	15639.4438	0.000423545	14012.43072	73.07117446	3085.98701	0.864846789	0.316895421	438.8714928	5791.097656	0.8233	6.20E-05	15986.24535	5.36E-05	13828.14057	1.96E-05	5077.735819	0.88337804	72.55873797	461.4976505	6634.817409	0.8938	0.022325108	15629.92437	0.000420588	14115.58144	72.37626997	2918.143768	131.1995	124.6201	120.8113	5.20850264	5.412649627	5.713815915
0.890893892	0.239298246	401.4276023	6432.575906	0.855	5.67E-05	17514.55661	5.05E-05	15608.75213	1.36E-05	4172.012047	0.8849893	72.5214134	405.0505423	6668.79962	0.8943	0.02230755	17110.64117	0.000415874	15477.05924	72.33580385	3257.405121	0.876179073	0.275199809	393.9240129	6070.752833	0.8383	5.67E-05	17518.38924	4.97E-05	15360.23585	1.57E-05	4803.097817	0.889992124	71.96847947	405.9187569	6807.490344	0.901	0.022142072	17119.87381	0.000413409	15575.77697	71.79790089	2989.585683	136.989	130.4452	126.8942	5.769512891	6.2885449	6.418660792
0.875648181	0.274832856	347.110554	6057.351003	0.8376	6.00E-05	16594.36139	5.25E-05	14544.9583	1.67E-05	4504.060649	0.889695565	71.98490231	363.5708259	6800.242451	0.9008	0.022150204	16213.15397	0.000416402	14747.75517	71.8138425	2810.37389	0.880379575	0.274780128	351.6284763	6160.882339	0.8414	6.01E-05	16572.41764	5.29E-05	14591.62471	1.65E-05	4552.238769	0.879765503	72.99324781	357.3677695	6534.900068	0.8886	0.022453505	16204.30137	0.000420812	14577.5532	72.7998091	3188.353928	133.5116	126.7484	122.9583	6.367909032	7.17312327	7.65455166
0.876962992	0.273766976	411.6206814	6090.786276	0.8394	6.26E-05	15858.24398	5.49E-05	13912.24836	1.73E-05	4300.156421	0.883710145	72.46429769	421.6773941	6648.109398	0.8949	0.022298348	15513.25791	0.000420649	14030.4861	72.28730584	2782.084255	0.870609757	0.284101825	406.7951489	5944.457012	0.8328	6.27E-05	15852.433	5.46E-05	13806.88539	1.78E-05	4497.998199	0.883708284	72.66412727	424.3446112	6633.660766	0.8926	0.022355682	15501.91978	0.000421662	14011.38741	72.4735724	2999.289379	131.4673	123.5462	119.2002	5.808763269	6.402020428	6.67487228
0.87267543	0.277578368	339.2885858	5997.346973	0.8358	5.97E-05	16671.3161	5.21E-05	14559.63036	1.67E-05	4590.494257	0.883870416	72.55229891	353.4427788	6644.757915	0.8939	0.022320414	16288.37812	0.000418573	14722.11319	72.368173	3061.723123	0.870676793	0.290128652	337.5990141	5938.283395	0.8317	5.97E-05	16667.69953	5.20E-05	14521.28713	1.74E-05	4808.781772	0.887391044	72.14508233	352.8635959	6742.996662	0.8988	0.022199044	16295.8142	0.000416774	14788.62256	71.9736418	2837.191032	133.6385	127.3565	123.5335	6.521427585	6.908763113	7.823316289
0.8804116	0.257075192	565.858733	6182.105743	0.8445	5.43E-05	18231.32445	4.78E-05	16059.16128	1.40E-05	4658.574778	0.886576576	72.23783001	577.6518882	6720.048457	0.8977	0.022220852	17821.52779	0.000412355	16156.36396	72.06183424	3197.945639	0.877753281	0.274937433	560.6653557	6101.971517	0.8391	5.43E-05	18226.48528	4.76E-05	16003.09954	1.50E-05	4994.448933	0.885376408	72.47010839	574.9032294	6680.192312	0.8949	0.022290201	17823.11979	0.000413417	16139.72328	72.28730462	3320.960778	139.5761	133.3058	130.4266	4.25570309	4.506582559	4.397159588
0.880720132	0.254999408	654.7687848	6191.109573	0.8451	5.43E-05	18227.03301	4.78E-05	16052.54463	1.38E-05	4652.122707	0.884793126	72.45988827	664.6965363	6669.424358	0.895	0.022287682	17823.29955	0.000413336	16122.0996	72.27922766	3293.473296	0.869361349	0.296613234	639.9673376	5903.946366	0.8297	5.42E-05	18229.90973	4.72E-05	15849.93276	1.61E-05	5405.549958	0.883578724	72.67974003	665.7203048	6630.099955	0.8924	0.022352449	17824.41887	0.000414317	16104.38253	72.48981307	3461.64377	138.7609	134.0021	131.0122	3.90273381	4.060036403	4.081672593
0.8810132	0.258557385	295.3858818	6190.74014	0.8443	5.90E-05	16939.72605	5.20E-05	14923.32349	1.53E-05	4367.353666	0.887112488	72.17084029	305.4601002	6735.514413	0.8985	0.02220576	16561.74046	0.00041629	15018.18593	71.99767298	2935.63517	0.876573195	0.278473465	293.5753131	6078.293023	0.8385	5.90E-05	16943.04198	5.17E-05	14854.821	1.65E-05	4700.116279	0.88959511	71.9597159	306.624237	6799.966152	0.9011	0.022141857	16562.4621	0.000415384	15059.42505	71.78993343	2877.435135	134.614	128.3262	123.9254	7.766505263	8.143856185	8.785125773
0.88845514	0.24117716	549.9478251	6375.539805	0.8529	5.40E-05	18335.96635	4.80E-05	16293.41103	1.30E-05	4422.941259	0.888382013	72.08114718	556.19253	6767.192975	0.8996	0.022173724	17932.7669	0.000411403	16289.43787	71.90963576	3141.71165	0.878037673	0.280162136	541.2300906	6104.584168	0.8388	5.40E-05	18334.78207	4.74E-05	16098.99424	1.51E-05	5130.789342	0.886650277	72.26298195	556.1511032	6719.767551	0.8974	0.022227976	17922.94428	0.000412243	16242.20375	72.08592439	3253.72242	140.2887	133.5149	130.5899	4.395310263	4.633700248	4.790836878
0.885040725	0.245407442	402.9561941	6291.898257	0.8492	5.77E-05	17224.40497	5.10E-05	15246.85381	1.42E-05	4226.13448	0.882735289	72.65072253	407.4680184	6615.87465	0.8927	0.022348295	16841.28296	0.000417161	15200.86271	72.46545263	3181.701579	0.874632707	0.283867879	391.3513643	6027.486357	0.8356	5.77E-05	17221.0882	5.05E-05	15062.72345	1.63E-05	4896.061752	0.887124225	72.32485781	407.5335118	6724.64269	0.8967	0.022248905	16831.14754	0.000415842	15259.82543	72.14219849	3163.408609	135.6069	129.7118	126.1404	5.586517018	6.323570254	6.014024263
0.88329288	0.261527548	374.580279	6239.252069	0.8458	6.03E-05	16509.22842	5.32E-05	14593.0618	1.59E-05	4266.802081	0.885300815	72.43639004	381.9147772	6680.988607	0.8953	0.022286185	16120.37775	0.000418644	14587.08531	72.25500922	2996.774266	0.872032783	0.300697618	364.4440702	5957.722877	0.8314	6.03E-05	16494.91496	5.26E-05	14384.95673	1.82E-05	4938.786986	0.883943393	72.48295518	384.9121493	6651.235163	0.8947	0.022301054	16128.42763	0.000418749	14578.51748	72.3034645	2955.135129	133.8226	126.0812	122.8634	6.013861425	6.800765145	7.103192271
0.889390243	0.237069974	378.1149076	6403.062017	0.8546	5.74E-05	17320.79803	5.11E-05	15409.75831	1.37E-05	4089.978235	0.887572655	72.22374429	383.4461521	6740.753202	0.8979	0.022219004	16928.07662	0.000415146	15358.70459	72.04578366	3087.809556	0.872858036	0.269272141	369.1907494	6006.07924	0.8367	5.74E-05	17318.25123	5.01E-05	15118.10539	1.55E-05	4646.802199	0.890698753	71.82729589	387.2457073	6831.891769	0.9027	0.022101146	16934.53207	0.000413361	15420.32709	71.66268807	2853.053395	136.2024	129.8172	126.7455	5.926789539	6.907762602	6.870584382
0.876122357	0.261967135	371.9740414	6079.727316	0.8398	5.85E-05	16980.9894	5.12E-05	14884.74693	1.54E-05	4422.346511	0.885839758	72.27507802	383.0798038	6703.180562	0.8972	0.022237326	16609.68825	0.00041622	15053.6307	72.10199415	2916.955194	0.875919455	0.286551106	369.4478183	6054.403945	0.8365	5.85E-05	16997.7303	5.11E-05	14909.40519	1.69E-05	4820.189002	0.886275625	72.33697713	382.6363636	6707.331958	0.8965	0.022254634	16611.89046	0.000416519	15063.90431	72.15829277	3001.700725	135.2181	128.3071	124.8979	5.821471669	6.54863265	6.773128936
0.876782391	0.283172101	399.1750866	6073.953063	0.8373	5.83E-05	17037.21784	5.11E-05	14945.98925	1.65E-05	4830.413591	0.887347435	72.23916676	414.4706472	6735.298095	0.8977	0.022224742	16658.35791	0.000415936	15111.9922	72.06183505	3002.852289	0.878823091	0.264433357	404.3079116	6137.485388	0.8418	5.83E-05	17036.14517	5.12E-05	14975.38719	1.54E-05	4496.346163	0.887235379	72.17853963	414.0556545	6737.498664	0.8984	0.022207458	16663.13591	0.00041562	15118.40935	72.00568689	2923.086042	135.14	128.7198	125.657	5.621316572	6.015653577	5.99784553
0.879349279	0.264695404	455.5388909	6148.252345	0.8421	6.12E-05	16197.67201	5.38E-05	14253.36802	1.62E-05	4271.106994	0.879885959	72.88088549	463.6987302	6545.143612	0.8899	0.022421908	15826.98977	0.000421275	14241.4219	72.6934602	3025.711428	0.870850857	0.304117505	447.571635	5933.6523	0.8306	6.12E-05	16197.44835	5.33E-05	14114.04148	1.87E-05	4900.076571	0.879814654	72.97772277	460.3460846	6536.821782	0.8888	0.022449544	15837.28398	0.000421668	14256.45859	72.78342783	3117.569532	131.5815	125.7155	122.204	4.893542454	5.491608121	5.472255842
0.877881998	0.284675015	688.2166965	6100.051401	0.8385	5.27E-05	18759.54001	4.62E-05	16470.12522	1.50E-05	5336.735719	0.886921643	72.280428	711.7325011	6723.958984	0.8972	0.022231623	18341.93547	0.000411153	16630.70995	72.10199334	3348.254458	0.873912164	0.281541776	687.1654297	6014.486234	0.8354	5.27E-05	18758.7971	4.60E-05	16393.15431	1.48E-05	5273.836605	0.883148465	72.58298825	708.5961947	6628.695579	0.8935	0.022323475	18337.21343	0.000412479	16554.70551	72.40056919	3426.63324	141.3946	135.4511	132.6169	3.451708394	3.527294826	3.48725313
0.883073152	0.246431521	509.3185089	6248.143801	0.8477	5.50E-05	18036.64126	4.86E-05	15914.79385	1.34E-05	4474.584051	0.889561189	71.94330412	524.8657495	6800.487851	0.9013	0.022132982	17644.07744	0.000411713	16035.01814	71.77400235	3075.961944	0.880985235	0.273007956	510.3824961	6175.705854	0.8421	5.49E-05	18055.65681	4.84E-05	15907.47364	1.50E-05	4924.383684	0.891143966	71.771087	524.7102059	6844.759354	0.9034	0.022081656	17647.41643	0.000410949	16067.74519	71.60715971	2973.077596	138.8934	132.724	130.0225	5.243151384	5.49785631	5.361435792
0.890679309	0.243591244	415.5688868	6424.038043	0.8543	5.62E-05	17684.33794	5.00E-05	15748.46185	1.37E-05	4293.049865	0.88151483	72.94894287	418.6511471	6571.333108	0.8892	0.022434569	17285.83243	0.000417219	15579.85432	72.75068588	3510.002024	0.876144206	0.27346452	408.2078712	6071.518545	0.8385	5.61E-05	17691.62159	4.92E-05	15506.22505	1.54E-05	4821.624687	0.891076266	71.88935698	422.8436807	6834.772949	0.902	0.022116998	17294.1582	0.000412534	15751.64139	71.71830229	3020.306098	137.6233	131.1442	127.5878	5.728524863	6.043559081	5.876605411
0.888312613	0.246713615	597.8661972	6367.052582	0.852	5.29E-05	18711.06643	4.70E-05	16619.34977	1.30E-05	4620.138615	0.888807898	72.12890668	606.9550662	6771.786119	0.8991	0.022184955	18294.88511	0.000410678	16619.31129	71.94962571	3366.621844	0.876130192	0.263571429	592.2721429	6081.21119	0.84	5.29E-05	18704.42726	4.64E-05	16382.56121	1.39E-05	4955.508333	0.88593337	72.42311558	607.0058068	6694.279955	0.8955	0.02227393	18292.59955	0.000411995	16562.83171	72.23887069	3451.960692	140.5145	135.8863	132.3315	4.174971826	4.225940405	4.207446702
0.881571456	0.254377662	581.0830573	6206.15452	0.8452	5.93E-05	16682.63086	5.23E-05	14697.66228	1.50E-05	4255.723497	0.892757264	71.62571807	603.0850641	6888.022095	0.9052	0.022042054	16325.5918	0.00041413	14895.49282	71.4647687	2685.904993	0.876129103	0.28250478	583.0057361	6059.933078	0.8368	5.93E-05	16681.49892	5.20E-05	14609.87857	1.66E-05	4746.912046	0.892641942	71.60945438	603.0187762	6886.720565	0.9054	0.022037215	16321.15165	0.000414067	14887.31602	71.44898229	2688.742876	132.6781	128.5345	124.6705	4.344361908	4.354102634	4.340821322
0.880424075	0.262209578	630.6375059	6176.077762	0.8436	6.00E-05	16492.08298	5.28E-05	14510.51682	1.56E-05	4350.845424	0.887682716	72.23100913	645.0151481	6742.677211	0.8978	0.022223919	16128.90544	0.000417449	14627.48546	72.05380873	2936.804077	0.874785503	0.291891244	629.5399449	6025.505689	0.8349	5.99E-05	16499.5518	5.25E-05	14429.34936	1.74E-05	4826.108756	0.886772594	72.25504178	650.2541504	6722.699387	0.8975	0.022231292	16137.70563	0.000417455	14627.96779	72.07789359	2928.325794	132.1105	127.6928	123.929	4.123650052	4.112958565	4.171733333
0.875545422	0.265855985	654.8929423	6063.61731	0.8388	5.98E-05	16523.10777	5.23E-05	14472.67881	1.59E-05	4381.270744	0.886020826	72.29342252	677.6697882	6705.342252	0.897	0.022243535	16151.6874	0.000417496	14630.19774	72.11807071	2888.114493	0.868648145	0.320096852	643.1682809	5868.1477	0.826	5.98E-05	16521.19939	5.19E-05	14356.6833	1.91E-05	5284.67046	0.879577125	73.04481982	664.3367117	6527.712838	0.888	0.022468358	16152.29662	0.00042078	14532.46117	72.84899821	3226.853716	132.2112	127.68	124.1886	3.64735446	3.707964401	3.737034926
0.884910205	0.239920066	636.6431174	6299.341836	0.8507	5.99E-05	16492.97426	5.30E-05	14593.96405	1.44E-05	3951.501469	0.886975074	72.18824446	648.3385283	6731.480908	0.8983	0.022211574	16125.65724	0.000417167	14619.8071	72.01370296	2881.93432	0.875915614	0.296992932	627.381694	6042.539715	0.8347	5.99E-05	16495.50449	5.25E-05	14450.52913	1.78E-05	4893.131544	0.884591134	72.55229891	642.1585188	6659.108513	0.8939	0.02232061	16124.05359	0.000418816	14581.21976	72.36817299	3041.110639	132.1093	127.5755	124.1557	4.054325284	3.952758499	4.029374332
0.897560455	0.211049468	459.8973648	6620.421174	0.8652	6.01E-05	16575.21082	5.40E-05	14854.6007	1.24E-05	3552.234859	0.899330364	70.94571522	471.319142	7073.613549	0.9137	0.021838253	16232.27766	0.000411845	14908.0038	70.79994297	2437.14403	0.894103317	0.240004663	456.6621984	6508.959902	0.8579	6.01E-05	16572.66441	5.38E-05	14795.93064	1.41E-05	4050.674204	0.899953238	70.93084583	469.4466572	7088.083707	0.9139	0.02183353	16221.74713	0.000411874	14900.64927	70.78444894	2460.139731	133.2365	127.2289	123.9568	6.088346882	6.468439131	6.365291333
0.890824751	0.241193681	629.1867759	6428.174254	0.8545	5.21E-05	18996.72557	4.64E-05	16919.70303	1.25E-05	4584.264131	0.889713918	71.93587752	642.7044597	6803.941203	0.9014	0.022127687	18576.59796	0.000409073	16891.08008	71.76603944	3232.101953	0.878838729	0.260833432	622.8147928	6141.042265	0.8423	5.21E-05	18996.16823	4.58E-05	16693.17779	1.35E-05	4970.138193	0.889813463	72.044995	638.7135874	6798.243862	0.9001	0.022159568	18577.26375	0.0004096	16894.2638	71.86969026	3331.569826	141.7619	136.7878	133.4379	3.930929711	4.102849152	3.984914502
0.884792067	0.248616182	599.7991992	6286.705335	0.8491	5.65E-05	17502.7528	5.00E-05	15484.49578	1.40E-05	4369.539984	0.886291773	72.25919322	609.3967016	6713.24961	0.8974	0.02223046	17114.44395	0.000414481	15503.48698	72.0859246	3045.614219	0.88318547	0.274774775	592.9853011	6223.100522	0.8436	5.65E-05	17500.0275	5.00E-05	15450.6234	1.55E-05	4826.42698	0.881621556	72.81834512	606.9440889	6582.636017	0.8907	0.022397256	17109.7749	0.00041696	15418.19743	72.62816832	3342.554508	136.867	130.7058	127.5418	4.370481781	4.321440311	4.328285199
0.892997962	0.230518346	585.9691322	6493.064298	0.8585	5.62E-05	17590.84985	5.03E-05	15703.62293	1.29E-05	4070.537216	0.897167441	71.18623037	595.9399363	7010.572417	0.9107	0.02190634	17206.70363	0.000409516	15770.35312	71.03316986	2703.376084	0.881807805	0.25499468	579.8357962	6214.585294	0.8459	5.62E-05	17589.77184	4.96E-05	15506.00397	1.43E-05	4509.382906	0.894090422	71.42040322	600.5795968	6930.430649	0.9077	0.021978539	17209.91164	0.000410502	15723.66739	71.26793848	2686.932026	137.136	131.0668	127.911	4.383914233	4.301504128	4.366953057
0.886792362	0.246179168	641.9071244	6331.43052	0.8506	5.79E-05	17083.30955	5.13E-05	15143.84192	1.42E-05	4215.048084	0.889314301	71.87307394	656.8363818	6800.813546	0.9021	0.022116212	16711.59794	0.000413911	15189.37915	71.71035193	2782.746813	0.872852589	0.298954201	629.5803582	5974.253035	0.8319	5.79E-05	17085.88977	5.05E-05	14911.25386	1.72E-05	5122.645871	0.889995637	71.98601243	656.7850799	6806.355684	0.9008	0.022148065	16705.32793	0.0004145	15192.86938	71.81384205	2956.348135	134.9182	129.4772	126.2151	3.950988327	4.029674945	3.948066867
0.890277972	0.229098552	593.4873891	6430.771602	0.8564	5.70E-05	17353.09715	5.08E-05	15442.34787	1.30E-05	3997.764713	0.893163997	71.56871619	605.8036207	6900.41318	0.9059	0.02202284	16978.16139	0.000411848	15495.75396	71.40954651	2770.135004	0.885326587	0.257257494	588.881992	6285.161907	0.8474	5.70E-05	17357.04602	5.05E-05	15361.1173	1.46E-05	4473.77071	0.883479948	72.42924159	600.5172568	6646.232436	0.8953	0.022282913	16971.7927	0.000415577	15325.13143	72.2550082	3036.160281	136.6039	129.9395	127.0685	4.338548696	4.287241508	4.312749442
0.883997058	0.247909551	629.0176658	6273.171711	0.8491	5.75E-05	17205.90614	5.08E-05	15201.43504	1.41E-05	4289.872689	0.891672248	71.77241532	647.099845	6855.423733	0.9034	0.022084052	16838.63095	0.000413141	15346.09975	71.60716024	2845.054461	0.87491231	0.289085899	623.8077153	6026.23158	0.8347	5.74E-05	17212.42782	5.03E-05	15054.94473	1.66E-05	4985.92656	0.882077525	72.72594752	640.8259699	6597.852658	0.8918	0.022370574	16829.38551	0.000417319	15173.99601	72.5385844	3230.644988	135.7425	129.6467	126.5264	4.074088088	3.986411809	4.04609726
0.888375177	0.242875572	561.0089129	6372.788671	0.8527	5.80E-05	17070.91322	5.16E-05	15160.38325	1.40E-05	4151.523162	0.89404851	71.47117187	578.1297542	6925.704884	0.9071	0.021994791	16696.40547	0.000412351	15252.22118	71.31507901	2673.944769	0.87607286	0.292399761	551.6465589	6050.402753	0.8355	5.80E-05	17066.63986	5.09E-05	14945.54009	1.68E-05	5015.338001	0.887392344	72.18891239	569.1375932	6739.702883	0.8983	0.022209701	16690.2606	0.000415512	15135.06797	72.01370262	3006.001336	134.9753	129.2129	125.8887	4.710763198	4.727173954	4.797886234
0.891157569	0.224399347	585.3347329	6453.285048	0.8574	5.48E-05	18056.81257	4.89E-05	16088.75885	1.23E-05	4055.728831	0.887767145	72.15833982	589.1853789	6749.155558	0.8987	0.022196676	17662.96183	0.000412468	16031.56454	71.98164983	3186.48559	0.888143618	0.242754899	583.9334741	6366.165317	0.8523	5.48E-05	18046.51437	4.87E-05	16019.48101	1.32E-05	4410.002581	0.894257786	71.42172524	597.1791341	6933.64074	0.9077	0.02197716	17658.22078	0.00040926	16133.51252	71.26793833	2782.086592	138.4728	133.1621	128.7852	4.392773629	4.448935107	4.544035757
0.897411851	0.200599839	454.9734687	6629.051217	0.8669	6.06E-05	16489.91291	5.45E-05	14774.44163	1.19E-05	3349.458069	0.8981027	71.04756686	460.004384	7040.459886	0.9124	0.021869804	16137.67832	0.000412798	14794.34457	70.90081974	2454.506576	0.891543415	0.232061603	444.959398	6457.745071	0.8571	6.06E-05	16491.33823	5.41E-05	14683.01561	1.37E-05	3881.500758	0.90487324	70.4830361	466.023706	7226.701827	0.9196	0.021699018	16146.58395	0.000410349	14916.71198	70.34570194	2291.414637	132.8397	126.8947	123.6117	6.594710298	7.064800911	6.916742232
0.890423429	0.241573034	555.6086142	6420.198502	0.8544	5.58E-05	17723.98724	4.97E-05	15777.4708	1.34E-05	4300.277154	0.895377448	71.46026673	565.5828282	6953.716191	0.9073	0.021987824	17337.88207	0.000410385	15864.18752	71.29935865	2866.846357	0.886812122	0.264622642	550.9075472	6314.50566	0.848	5.58E-05	17730.92146	4.95E-05	15723.16	1.48E-05	4691.231958	0.895445595	71.56887417	564.5602649	6947.509934	0.906	0.022019301	17335.32219	0.000410919	15861.62212	71.4016649	2979.281236	137.7863	131.4325	127.1113	4.575940593	4.542867349	4.704690458
0.892706927	0.225611176	511.7145518	6491.22142	0.859	5.96E-05	16670.96892	5.33E-05	14862.70263	1.32E-05	3805.033993	0.896934789	71.20032949	524.1982427	7004.894563	0.9105	0.021914368	16318.48666	0.000412566	14948.29487	71.04877333	2550.854915	0.893318719	0.23635091	510.2659823	6490.827112	0.8572	5.96E-05	16670.33481	5.33E-05	14873.76048	1.38E-05	3992.186304	0.899703736	71.02059597	525.2648992	7076.156223	0.9128	0.021859287	16323.49178	0.000411805	15001.09002	70.86975034	2533.906004	133.3738	127.8488	124.4395	5.469266273	5.905924023	5.742694468
0.893716704	0.212346252	619.0647482	6528.047111	0.8618	5.45E-05	18177.08424	4.87E-05	16237.93147	1.15E-05	3876.974472	0.893713047	71.61298873	626.2125028	6908.445549	0.9054	0.022032531	17778.95427	0.000409861	16233.85519	71.44898171	2994.602165	0.87616177	0.276717557	598.0858779	6070.944656	0.8384	5.45E-05	18171.13979	4.78E-05	15910.019	1.49E-05	5062.912691	0.887872025	72.14886515	620.694704	6752.024255	0.8988	0.022193938	17770.98198	0.000412228	16119.08634	71.97364097	3203.808189	138.7464	133.8142	129.6369	4.558145132	4.707385512	4.74641532
0.875524308	0.280095637	686.8163778	6048.071847	0.8365	5.40E-05	18310.56139	4.73E-05	16027.77011	1.51E-05	5146.483204	0.880509442	72.87842697	700.118427	6556.99573	0.89	0.022412307	17901.77764	0.000414908	16114.06847	72.68529126	3553.249326	0.871657795	0.323433539	681.0982736	5931.111795	0.8283	5.40E-05	18309.42207	4.71E-05	15955.20452	1.74E-05	5946.264518	0.883846486	72.61330049	705.6448724	6639.847291	0.8932	0.022332205	17903.24575	0.000413777	16173.42406	72.42488698	3459.155508	138.7852	134.6822	131.086	3.540771238	3.534176447	3.636152362
0.886698603	0.256685122	643.9544116	6318.595476	0.8489	5.16E-05	19167.58711	4.58E-05	16994.80506	1.32E-05	4915.907174	0.885567944	72.39629382	650.3721813	6688.898415	0.8958	0.022265231	18741.37598	0.000410703	16966.20388	72.21467781	3481.517861	0.87884005	0.270803614	636.0130766	6133.768188	0.8412	5.16E-05	19161.99215	4.54E-05	16838.10862	1.39E-05	5210.760699	0.890113632	71.94530123	656.5464329	6811.418063	0.9013	0.022129678	18743.44547	0.000408713	17051.99377	71.77400196	3280.610563	142.2739	137.5035	133.8415	3.883977187	3.972302575	3.922649328
0.805556146	0.649434572	938.6760905	4484.932687	0.7428	4.99E-05	19764.67232	4.02E-05	15917.72614	3.23E-05	12864.45732	0.816288571	80.31883879	979.8405188	5040.275355	0.8095	0.024631777	19285.31958	0.000444677	16131.0335	79.91342356	8017.652996	0.781638594	0.778553477	894.3725216	4066.621893	0.7162	4.99E-05	19765.77758	3.90E-05	15448.09774	3.88E-05	15422.37671	0.808029398	81.62049931	961.2707314	4856.879814	0.7971	0.025014205	19269.08104	0.000450581	15954.69842	81.15659066	9192.506837	145.6175	139.4356	132.0627	2.544993861	2.412519977	2.518048592
0.90277562	0.234676209	299.7422371	6724.451691	0.8663	6.12E-05	16393.70657	5.53E-05	14785.50297	1.42E-05	3873.259494	0.919631756	69.03686734	317.1167821	7668.060202	0.9385	0.021263882	16050.96697	0.00040466	15065.08614	68.92904218	1788.918487	0.908693105	0.189608022	302.5382862	6914.10711	0.8776	6.12E-05	16383.15998	5.57E-05	14866.73414	1.13E-05	3155.973222	0.897266352	71.2514562	306.0423123	7008.10166	0.9099	0.021930345	16038.22002	0.000414267	14696.82914	71.09562426	2590.255083	133.4911	126.5721	118.0631	8.401602275	8.432544194	8.464403014
0.809513633	0.574219269	857.633887	4589.695282	0.7525	4.87E-05	20272.99375	3.94E-05	16413.72858	2.80E-05	11636.30193	0.829460058	78.76318022	894.5663556	5318.020725	0.8251	0.024165833	19778.53703	0.0004367	16800.53596	78.40251422	7313.405527	0.793180438	0.711969218	822.8705511	4253.727772	0.7277	4.87E-05	20264.21121	3.87E-05	16068.58702	3.46E-05	14438.37639	0.825017898	79.67720588	886.132598	5198.915441	0.816	0.024434798	19768.37292	0.000440919	16703.40998	79.2768577	8126.165074	149.6988	140.388	130.938	2.58551321	2.54213611	2.711633456
0.898990475	0.226904376	300.0652929	6637.55059	0.8638	6.10E-05	16440.73466	5.49E-05	14775.87655	1.38E-05	3739.904029	0.917444151	69.27862718	314.0717417	7598.813322	0.9353	0.021336326	16095.94708	0.000405587	15083.9543	69.16487378	1873.799636	0.896961902	0.222402597	298.5146104	6591.342764	0.8624	6.11E-05	16433.81702	5.48E-05	14733.18257	1.34E-05	3679.687268	0.890564605	71.97158713	301.8938957	6818.734739	0.901	0.022146296	16071.98513	0.000417329	14624.10483	71.79790172	2872.91576	133.8389	126.5012	117.8233	8.794756778	8.576584318	8.305183749
0.821989934	0.549299463	718.7813277	4811.07097	0.7637	5.47E-05	18076.95168	4.50E-05	14842.53503	2.98E-05	9992.854524	0.847679083	76.64050513	770.1259294	5728.352532	0.8473	0.023539789	17652.56108	0.000432331	15300.03799	76.3482986	5326.803729	0.817317115	0.635180019	705.2388734	4685.364554	0.7527	5.47E-05	18069.30969	4.48E-05	14746.94316	3.44E-05	11568.73469	0.828543696	79.09978097	746	5284.269895	0.8218	0.02426851	17643.12643	0.000443245	14960.16959	78.71734855	6961.719761	139.9172	133.323	124.0178	3.835458794	3.820637512	4.09634998
0.821673173	0.540130719	347.2159477	4815.731242	0.765	5.96E-05	16722.41242	4.90E-05	13731.05436	3.19E-05	9103.142484	0.844573422	76.99549496	373.3791346	5656.323059	0.8435	0.023650433	16316.95388	0.000438095	14090.09732	76.69225253	5143.955068	0.8129014	0.634736139	339.3064796	4605.159252	0.7485	5.97E-05	16716.8016	4.86E-05	13575.18235	3.75E-05	10700.23794	0.830996462	78.69076159	364.1882795	5344.299915	0.8259	0.024153098	16325.91125	0.000445469	13886.97322	78.32657439	6127.104976	135.5958	127.8459	117.0749	6.528630971	7.08821227	8.297426709
0.836690505	0.454058876	538.2338473	5134.152542	0.7847	5.23E-05	18924.73722	4.38E-05	15826.53323	2.36E-05	8637.239327	0.857696435	75.39865257	567.5668486	5974.606923	0.8609	0.023166415	18489.02463	0.000424668	16217.39875	75.14219012	4876.704263	0.830917169	0.506459948	533.2511628	4989.633075	0.774	5.23E-05	18919.30271	4.35E-05	15709.23329	2.63E-05	9642.477907	0.84689688	76.71789722	557.4550502	5711.181689	0.8465	0.023559643	18471.03071	0.000430606	15997.21248	76.4204525	5677.957118	142.8742	136.4938	127.2934	4.699827056	3.99541757	4.171296734
0.814413102	0.5569036	826.1341158	4685.264275	0.7583	4.74E-05	20845.62864	3.86E-05	16979.54722	2.64E-05	11598.53079	0.837258511	77.77121992	876.1705974	5494.441638	0.8353	0.023870029	20348.67784	0.000431106	17448.75804	77.44512498	6799.893571	0.793820839	0.74696468	788.3843819	4242.619757	0.7248	4.74E-05	20834.67964	3.76E-05	16536.31317	3.53E-05	15593.81636	0.826135903	79.45807871	856.4331459	5228.043266	0.8182	0.024367925	20332.18553	0.000438784	17206.35373	79.06369502	8228.662308	151.0553	142.5359	133.9207	2.626983424	2.731210572	2.90740632
0.907225993	0.212558726	284.6507391	6852.968832	0.8727	6.18E-05	16254.96941	5.61E-05	14735.38961	1.30E-05	3471.958634	0.92419494	68.65052453	303.0625199	7806.218396	0.9437	0.021147712	15903.93536	0.000403668	14994.13147	68.54922724	1681.224224	0.913608622	0.188294011	291.0855263	7038.426497	0.8816	6.18E-05	16259.11196	5.65E-05	14844.80562	1.16E-05	3061.803993	0.897685943	71.14398595	291.2100527	7024.916155	0.9112	0.021899788	15895.97586	0.000414387	14570.24852	70.99419259	2462.884438	133.5134	125.6652	116.514	8.698552778	8.840696181	8.919170589
0.839524691	0.452305347	695.40315	5189.422456	0.7873	4.94E-05	20022.09641	4.15E-05	16802.04027	2.22E-05	9083.449384	0.854065359	75.81443419	719.9886722	5886.459535	0.8563	0.023287744	19560.81116	0.000424027	17091.67644	75.54584995	5390.945697	0.826716315	0.50971251	678.969697	4924.837089	0.7722	4.94E-05	20022.50583	4.09E-05	16546.07671	2.51E-05	10231.73297	0.843119979	77.38570578	708.5449672	5609.102204	0.8395	0.02375279	19550.54509	0.000431134	16869.95491	77.05766951	6581.603335	148.3874	139.5642	130.1498	3.489859774	3.514239371	3.608456728
0.910279097	0.19704041	285.5864542	6950.254639	0.8785	5.59E-05	18175.0206	5.10E-05	16520.30241	1.07E-05	3632.398293	0.923200643	68.66991732	300.1994912	7780.815985	0.9434	0.021148493	17806.80496	0.000398118	16774.28006	68.57102509	1826.803159	0.909913179	0.195305378	284.4102097	6937.981313	0.8776	5.59E-05	18155.78783	5.10E-05	16485.30956	1.04E-05	3649.397562	0.908293684	70.16466385	293.110642	7325.304644	0.9237	0.021598392	17796.1494	0.000404762	16499.03242	70.03345953	2419.166937	140.5459	133.0799	124.7785	10.23355721	10.27630848	10.13378694
0.79555788	0.681135681	855.9456729	4309.801256	0.7326	4.85E-05	20361.44704	3.86E-05	16198.33594	3.30E-05	13884.68114	0.827283423	79.22008287	910.8223251	5259.730441	0.8206	0.024297865	19867.08872	0.00043858	16833.44142	78.83245847	7892.410066	0.794119983	0.710562414	847.9736626	4271.899863	0.729	4.85E-05	20356.06296	3.85E-05	16158.65555	3.44E-05	14477.01756	0.818947197	80.0112	906.4653538	5093.703754	0.8125	0.024539622	19858.11458	0.000442165	16656.2339	79.61835749	8002.954338	149.2993	140.9201	132.7621	2.443055364	2.550669714	2.645468501
0.837859907	0.44324393	344.496123	5162.832465	0.7867	5.80E-05	17158.6118	4.86E-05	14364.67581	2.54E-05	7675.980297	0.856821855	75.4980228	359.703652	5953.327518	0.8598	0.023201478	16783.08246	0.000429908	14713.64258	75.23832629	4450.88381	0.815712928	0.562236287	326.5772679	4700.910338	0.7584	5.79E-05	17182.25409	4.73E-05	14014.1468	3.26E-05	9629.265427	0.840560448	77.55563515	352.1494747	5558.208453	0.8376	0.023814915	16761.59253	0.000439094	14417.9009	77.23246851	5562.490807	138.2394	129.6126	117.4386	6.494820062	6.205668476	7.262343288
0.799384297	0.643446503	876.7375896	4393.301637	0.7393	4.79E-05	20605.88381	3.83E-05	16464.7655	3.07E-05	13292.77993	0.831303977	78.66569838	927.6623094	5351.882353	0.8262	0.02413294	20110.53074	0.000435603	17116.23174	78.29812939	7596.55144	0.793978387	0.686397813	856.2533151	4286.851538	0.7315	4.79E-05	20603.16842	3.81E-05	16349.23881	3.28E-05	14180.88339	0.819479389	79.81777996	914.2043222	5113.200884	0.8144	0.02448192	20100.01793	0.000440784	16866.60738	79.4326068	7963.080182	150.0125	141.8599	133.8747	2.558308768	2.488869621	2.648357965
0.925976714	0.149494276	249.0257864	7412.675892	0.8997	6.00E-05	16865.29665	5.55E-05	15623.39932	9.03E-06	2487.372569	0.933836737	67.64528933	258.8719449	8122.048047	0.9574	0.020844203	16508.2677	0.000397533	15742.53855	67.56831462	1289.766033	0.917384735	0.186582336	243.8434606	7139.383555	0.8854	6.01E-05	16845.3534	5.51E-05	15450.74753	1.11E-05	3162.501468	0.909721006	70.09073213	249.3177247	7362.236725	0.9247	0.021579273	16475.16622	0.000408306	15299.11885	69.9577239	2255.337839	134.9683	128.1579	119.536	10.2805299	10.46665026	10.24588229
0.823282269	0.554742618	663.5252156	4837.894434	0.7654	4.75E-05	20827.91978	3.91E-05	17138.21274	2.63E-05	11569.555	0.842140731	77.45761297	705.3512579	5589.256826	0.8387	0.023773527	20338.99523	0.000429832	17532.49989	77.13117083	6804.980207	0.796531736	0.693233083	636.3295967	4312.883527	0.7315	4.75E-05	20828.35325	3.78E-05	16583.53944	3.29E-05	14452.24716	0.828263524	79.121972	687.4959221	5278.181497	0.8215	0.024270299	20323.80816	0.000437354	17236.07415	78.74609204	7847.686427	151.0616	142.5537	133.5155	3.899000569	3.344116671	3.46022539
0.903174585	0.216440249	218.875662	6748.332259	0.8686	6.14E-05	16571.66314	5.57E-05	14887.78823	1.24E-05	3835.466728	0.915142687	69.48187862	229.922582	7530.56187	0.9326	0.021398094	16256.33777	0.000406811	15141.64903	69.36511495	2072.968261	0.900548266	0.261370245	215.6825637	6640.158078	0.8597	6.14E-05	16556.49296	5.56E-05	14835.78171	1.47E-05	4708.193091	0.902122337	70.98423473	224.6371798	7129.533611	0.9134	0.021846659	16234.73998	0.000413459	14906.75754	70.82319724	2866.762098	135.4834	126.9066	117.532	11.37452964	11.32927519	11.38064919
0.811029175	0.634152859	760.7258151	4582.663549	0.7484	4.94E-05	20004.44294	4.01E-05	16221.0181	3.13E-05	12691.50695	0.8327966	78.41184989	808.2532883	5388.128756	0.8287	0.024061692	19529.11247	0.000435668	16657.74649	78.06192146	6996.411005	0.795010443	0.773798044	737.570051	4264.423337	0.7259	4.94E-05	20000.81402	3.93E-05	15892.93402	3.82E-05	15462.21353	0.819608701	79.87504607	793.8529303	5112.392309	0.8139	0.024498336	19519.51653	0.000442199	16390.7642	79.48140537	7865.127411	148.4197	139.4614	129.6485	2.859012401	2.863373891	2.980058347
0.822333159	0.532785817	767.3730935	4838.177943	0.7671	4.71E-05	21002.1271	3.87E-05	17261.72481	2.49E-05	11240.24964	0.846270914	76.7527479	809.8715282	5698.861482	0.8461	0.023565613	20515.22137	0.00042627	17766.63384	76.4565793	6240.960643	0.818685076	0.610066225	749.4850331	4715.717086	0.755	4.71E-05	20999.29258	3.86E-05	17183.29712	2.85E-05	12887.11245	0.83757717	77.97323893	798.375015	5486.875915	0.8333	0.023926882	20503.5153	0.000431811	17577.63615	77.63100126	7218.701668	152.5572	142.925	133.4696	2.996919779	3.153438599	3.261514348
0.820125786	0.533289732	684.1913669	4792.558404	0.7645	5.15E-05	19207.41949	4.23E-05	15731.96583	2.72E-05	10316.41805	0.844662482	77.0510083	731.8979834	5654.516014	0.843	0.023656426	18765.95184	0.000431377	16215.27962	76.73773842	6059.492764	0.801850761	0.673995657	648.7901737	4404.547503	0.7368	5.15E-05	19193.47014	4.14E-05	15362.72309	3.43E-05	13071.63219	0.824547413	79.57356181	706.6149327	5198.623256	0.817	0.02440763	18749.9377	0.00044269	15827.35631	79.17982427	7618.853978	145.1692	136.9614	128.5166	3.968068971	3.946506055	5.063094354
0.874230253	0.316245487	253.8421179	5990.568231	0.831	4.58E-05	22005.44224	4.01E-05	19216.57904	1.44E-05	6988.868472	0.884708847	72.36636536	268.6029461	6674.432206	0.8961	0.022252151	21513.75896	0.000405469	19438.96509	72.19050011	3904.940743	0.877227027	0.307194245	256.1261391	6059.907914	0.834	4.58E-05	22009.99748	4.02E-05	19296.55277	1.40E-05	6807.306595	0.880161756	72.99617376	265.5923925	6542.103084	0.8886	0.022439588	21506.8178	0.000408356	19334.78408	72.79980633	4364.634144	155.5419	146.2604	136.3253	10.03478173	10.70801531	12.35051739
0.816012793	0.531931669	494.1080158	4721.085677	0.761	6.09E-05	16258.07608	4.97E-05	13280.76049	3.26E-05	8579.096978	0.84535958	77.1677358	526.301972	5657.989071	0.8418	0.023699301	15871.69648	0.000439875	13748.88861	76.847133	5165.503683	0.808803762	0.610844017	480.3269231	4558.901976	0.7488	6.09E-05	16268.53846	4.92E-05	13179.00287	3.75E-05	9848.579193	0.834860727	78.37095996	517.5132658	5421.361312	0.8292	0.024058524	15858.40593	0.000445187	13565.69556	78.01485539	5749.535094	134.5277	125.7984	114.447	5.200137759	4.976219191	4.787816935
0.826345555	0.522795168	441.9188206	4905.525263	0.7699	5.76E-05	17182.87193	4.76E-05	14197.51643	3.02E-05	8959.189245	0.841957751	77.4077693	465.3403241	5589.444471	0.8392	0.023769388	16757.54218	0.000438241	14433.67921	77.08521868	5566.506554	0.817870542	0.592171383	433.6368686	4713.225602	0.7562	5.77E-05	17152.64639	4.73E-05	14011.77472	3.38E-05	10256.4159	0.840832361	77.09806482	467.8051763	5592.089161	0.8423	0.02368209	16767.5295	0.000436698	14427.20043	76.80151295	5107.347026	139.5561	129.6607	115.8009	4.727415022	4.880038474	5.260119694
0.83908346	0.487546302	395.6887214	5155.255971	0.7829	5.64E-05	17589.77494	4.73E-05	14776.1878	2.78E-05	8471.205646	0.85908149	75.62877111	417.150961	5983.057542	0.8585	0.023235114	17160.33966	0.000429361	15086.67266	75.35225803	4815.265579	0.827100199	0.542403746	384.489334	4907.766129	0.7688	5.64E-05	17574.49259	4.67E-05	14544.89426	3.08E-05	9472.473725	0.842138134	77.39385275	407.5804146	5593.764355	0.8394	0.023762485	17165.12187	0.000436996	14812.1887	77.06685209	5684.5797	140.1985	131.2929	117.3761	5.750608468	5.483184256	5.231620092
0.85938901	0.387825657	462.3695518	5620.164341	0.8099	4.72E-05	21046.26114	4.06E-05	18062.60301	1.80E-05	8263.500926	0.866140048	74.75238973	477.6937694	6163.848555	0.8683	0.022964422	20571.20281	0.000417463	18208.55852	74.50179674	5338.081654	0.855728442	0.394044665	460.7441687	5540.151365	0.806	4.72E-05	21045.67469	4.04E-05	17988.61063	1.83E-05	8411.467618	0.863241677	74.95057737	478.6579677	6099.654965	0.866	0.023025287	20569.78938	0.000418328	18147.00581	74.69966524	5348.156697	152.4835	143.3109	133.0942	5.251278678	5.413006668	6.620628849
0.847285415	0.41745135	295.7583176	5356.235405	0.7965	6.02E-05	16640.85675	5.10E-05	14106.53715	2.52E-05	6942.015191	0.862851961	75.06151711	311.8115171	6085.409806	0.8648	0.023069951	16249.89709	0.000430069	14343.18537	74.80332271	4284.742946	0.845510249	0.438114444	293.2868666	5311.687673	0.7934	6.03E-05	16621.12503	5.10E-05	14046.95002	2.62E-05	7323.629569	0.854609645	76.13294256	307.4187573	5874.655569	0.853	0.023388282	16237.42438	0.000434821	14201.3471	75.83811844	4948.510082	135.5957	127.5293	115.5973	8.292107182	8.583026361	10.03958827
0.825252316	0.553033268	515.8383562	4869.662492	0.7665	6.16E-05	16075.41187	5.08E-05	13267.07188	3.40E-05	8893.353164	0.843297106	77.18585859	551.5585264	5624.21735	0.8415	0.023708326	15703.40071	0.000440437	13562.23371	76.87452899	4989.535235	0.822280583	0.612392881	514.0233355	4783.14265	0.7585	6.16E-05	16075.35939	5.07E-05	13216.32102	3.77E-05	9839.01002	0.83893538	77.92708083	544.9421924	5510.351643	0.8338	0.023926744	15688.78628	0.000443837	13471.84785	77.5844538	5500.801871	133.8146	125.4195	113.3064	4.415928763	4.575731608	4.573348777
0.818281453	0.547387766	462.5111578	4753.596219	0.7618	4.98E-05	19905.82948	4.08E-05	16273.38909	2.71E-05	10953.51063	0.850928805	76.31554824	500.4062757	5802.152662	0.8509	0.023435585	19443.48231	0.000426627	16922.55602	76.02528167	5828.00094	0.831986108	0.541990669	469.3600311	4988.86366	0.7716	4.98E-05	19893.05158	4.15E-05	16531.62512	2.66E-05	10910.82258	0.846079471	77.06026097	491.4918149	5676.565362	0.843	0.023654757	19432.92645	0.000430013	16816.37375	76.7377383	6481.187544	148.6799	139.5007	128.1813	4.441940566	4.464481998	5.513277638
0.841004548	0.463718389	372.3750159	5207.048037	0.7869	5.59E-05	17770.60567	4.70E-05	14950.45831	2.60E-05	8206.041683	0.86237332	74.96558097	397.5153615	6083.568954	0.8658	0.023039134	17354.13791	0.000425862	15309.22111	74.71692318	4394.164703	0.834935498	0.486673501	371.0517683	5083.188877	0.7804	5.59E-05	17763.97181	4.67E-05	14831.4905	2.73E-05	8613.419785	0.847648264	76.62501475	386.1341593	5729.107139	0.8475	0.0235354	17349.9541	0.000433163	15060.06564	76.33028196	5226.818053	140.841	131.7493	119.6002	5.849010087	5.675759818	6.629039143
0.871041064	0.308007718	246.6261457	5927.420646	0.8292	5.20E-05	19465.09515	4.53E-05	16964.24703	1.61E-05	5955.496141	0.873460753	73.59353375	255.3838911	6375.202155	0.8815	0.022625986	19027.54543	0.000416308	17011.73304	73.38617082	4007.294838	0.861801185	0.38886832	240.7603357	5660.29162	0.8103	5.21E-05	19445.87387	4.49E-05	16757.71708	2.03E-05	7564.504134	0.87777792	73.5399524	255.3470475	6459.388077	0.8823	0.022605635	18985.75564	0.000416379	17030.16697	73.31963052	4332.856738	146.0398	137.637	126.589	10.63346679	11.21979639	13.45549252
0.852744331	0.394346906	723.6908231	5477.550616	0.8031	4.53E-05	21818.56929	3.86E-05	18604.53645	1.78E-05	8621.194745	0.862958992	74.94665127	754.456351	6095.044111	0.866	0.023023489	21315.32656	0.000416684	18814.7526	74.69966474	5400.026905	0.843172607	0.439919049	710.2370352	5260.564887	0.7906	4.53E-05	21820.93473	3.82E-05	18398.71541	1.99E-05	9607.999621	0.858140292	75.56121974	748.2884078	5971.33473	0.8592	0.02320534	21314.67132	0.000419443	18714.60894	75.29086418	5905.657239	154.7583	145.7387	136.8395	3.286378114	3.260095445	3.482002262
0.836870593	0.482419128	534.157141	5120.657333	0.7821	6.53E-05	15146.52474	5.46E-05	12674.39493	3.16E-05	7275.012658	0.844214025	76.77488768	555.1749823	5665.194609	0.8458	0.023591753	14793.3379	0.00044167	12787.50321	76.48370312	4397.615985	0.826214391	0.547882736	520.3250814	4887.829707	0.7675	6.53E-05	15141.00104	5.40E-05	12507.66891	3.57E-05	8306.319609	0.849112863	76.71182237	551.5645447	5747.224873	0.8467	0.023566752	14793.11563	0.000441586	12861.4899	76.40240595	4675.020196	129.902	121.8068	109.1968	4.24626848	4.178884272	4.727099508
0.831202119	0.492529624	362.9319938	5008.416795	0.7764	5.60E-05	17738.16525	4.65E-05	14744.24651	2.76E-05	8710.503606	0.850351856	76.26309608	385.2595725	5796.167724	0.8514	0.023427964	17315.43164	0.000431679	15066.38144	75.98063596	5006.310078	0.828022114	0.534357106	358.4510672	4916.65721	0.7684	5.61E-05	17717.14901	4.65E-05	14659.27022	2.98E-05	9502.295679	0.846192948	76.68611242	383.6239962	5702.02291	0.8468	0.023554931	17310.75189	0.000433535	14990.64156	76.39337956	5210.76854	141.4269	131.6551	118.5995	5.509088526	5.897181021	6.850496314
0.848780023	0.422801957	386.6347673	5382.741628	0.7973	5.34E-05	18604.77248	4.54E-05	15785.07253	2.25E-05	7887.411765	0.86722889	74.3369229	410.7229923	6211.353305	0.8729	0.022849794	18169.12178	0.000420976	16102.49524	74.10918836	4269.87341	0.857091282	0.402726146	394.152912	5566.825031	0.807	5.34E-05	18595.04622	4.58E-05	15924.89581	2.14E-05	7515.387361	0.862172	75.00901421	403.0977696	6077.162718	0.8653	0.023049996	18174.35491	0.000423956	16024.69028	74.7600964	4655.818098	144.2912	134.6976	123.0913	6.122320031	6.006775694	7.032322825
0.85473698	0.390192427	348.6139044	5522.214153	0.8055	5.16E-05	19273.86741	4.41E-05	16479.1594	2.01E-05	7540.951707	0.867158046	74.4659782	363.3086632	6201.271945	0.8715	0.022884616	18835.75376	0.000419918	16712.44288	74.22823944	4585.776936	0.851271693	0.436888331	344.6017566	5417.067503	0.797	5.16E-05	19281.19197	4.39E-05	16420.11684	2.26E-05	8407.71192	0.8686522	74.50843761	364.9951785	6225.040868	0.8711	0.022895097	18835.15658	0.000420166	16739.45729	74.26232473	4741.188956	147.074	137.2382	124.208	6.291988875	6.538184821	7.686126202
0.859813076	0.366646154	397.5297231	5643.419446	0.8125	4.86E-05	20500.16345	4.19E-05	17605.24863	1.76E-05	7588.866215	0.872109059	73.96363844	411.3449219	6324.684486	0.8773	0.022730781	20024.67753	0.000415227	17831.42848	73.73750079	4709.232874	0.851580411	0.41343992	387.0874344	5444.316762	0.8006	4.87E-05	20458.29515	4.17E-05	17370.78156	1.96E-05	8626.55271	0.869864604	74.16767631	410.6964224	6270.068694	0.8749	0.022792994	20024.34964	0.000416125	17787.22317	73.93977542	4739.652189	150.7747	141.1469	131.3214	6.477155233	6.880909852	7.238183615
0.865971714	0.329278677	446.6613551	5800.725094	0.8221	5.19E-05	19152.39302	4.51E-05	16560.3628	1.68E-05	6384.82642	0.876548478	73.29649718	459.9841808	6453.018983	0.885	0.022536616	18730.81695	0.000415022	16772.10861	73.09594244	3892.428588	0.863710143	0.349865624	438.9205961	5742.562912	0.8186	5.19E-05	19152.24982	4.49E-05	16518.24856	1.79E-05	6777.453457	0.875238948	73.51971895	459.0269719	6413.072983	0.8824	0.022602879	18726.81471	0.000416067	16740.41266	73.31132071	4038.985041	146.1006	136.5508	125.9044	6.068828523	6.255287312	6.233671522
0.856916152	0.376235178	301.3137352	5581.063241	0.8096	5.22E-05	19119.94837	4.47E-05	16384.00112	1.96E-05	7193.745059	0.876873064	73.25341615	320.4597403	6462.108752	0.8855	0.022524197	18690.77719	0.000415024	16755.94163	73.0546688	3784.682778	0.858626543	0.392229646	301.7666419	5597.932195	0.8082	5.22E-05	19128.42935	4.48E-05	16432.83367	2.05E-05	7503.419203	0.862549227	75.11501967	312.3362648	6076.611433	0.8642	0.023078054	18684.49167	0.000423355	16489.87355	74.85525545	4949.752488	145.4098	136.425	125.6058	7.568967166	7.376081277	9.070402767
0.828856925	0.522550544	592.3828409	4947.766719	0.7716	6.29E-05	15732.89217	5.21E-05	13038.08103	3.28E-05	8209.283307	0.851553121	76.72386914	620.8415023	5786.301524	0.8467	0.023564333	15381.80465	0.000439601	13420.3291	76.40240604	5023.243888	0.826020542	0.555120678	580.4285714	4879.429746	0.7665	6.28E-05	15743.66432	5.19E-05	13009.87506	3.50E-05	8696.705936	0.843924838	77.53389021	614.0346062	5612.415274	0.838	0.023808369	15367.22446	0.000443202	13283.70041	77.19560601	5308.397255	132.5062	124.3478	110.8972	4.42454083	4.393704036	4.743946897
0.841502949	0.463705584	551.784264	5221.663959	0.788	6.53E-05	15134.6184	5.50E-05	12740.05809	3.04E-05	6985.381345	0.853165263	75.90634865	578.9342921	5865.48825	0.8553	0.023330495	14784.44593	0.000437995	12915.04422	75.63418129	4099.853619	0.829420906	0.535927367	533.3413748	4951.177691	0.771	6.54E-05	15129.8192	5.42E-05	12552.48541	3.49E-05	8111.031647	0.850237178	76.45467389	569.8971038	5781.87709	0.8494	0.023492131	14774.44125	0.000440508	12860.14684	76.15954363	4464.624441	129.8062	121.7274	109.2064	4.274089559	4.179125416	4.739852217
0.81392843	0.534105873	848.1514353	4685.462207	0.7594	5.34E-05	18484.89979	4.35E-05	15043.54138	2.85E-05	9885.104688	0.818270257	79.68563021	872.7344286	5104.340118	0.8156	0.024451292	18035.53764	0.000444577	15118.97682	79.3157382	6847.756621	0.792448796	0.711575474	807.2037393	4244.252131	0.7274	5.34E-05	18480.31743	4.23E-05	14639.71655	3.79E-05	13183.69797	0.824843484	79.56002937	867.4657937	5203.127035	0.8171	0.024406513	18033.37474	0.00044421	15234.29463	79.17013461	7211.755354	140.8836	135.0968	126.7264	2.621993715	2.533027785	2.533839585
0.872089948	0.327932285	371.8128174	5930.104716	0.827	5.72E-05	17435.71971	4.99E-05	15193.24398	1.85E-05	5766.868682	0.891192687	72.01721266	393.8421988	6827.984342	0.9005	0.022154656	17067.29173	0.000413984	15545.44848	71.83776701	3138.082177	0.869267051	0.354760166	373.4633552	5848.350134	0.8214	5.70E-05	17463.31532	4.96E-05	15188.25453	2.02E-05	6198.414171	0.87532479	73.67060293	385.1117293	6404.27603	0.8807	0.022651505	17045.64562	0.00042132	15246.90981	73.45283394	3824.604178	137.9558	130.5042	120.7117	6.486142641	7.063029262	7.358245926
0.874619223	0.314966314	485.1831088	5998.358518	0.8312	5.35E-05	18530.32267	4.68E-05	16206.51061	1.68E-05	5854.315207	0.889511108	72.17293568	512.0122413	6782.778544	0.8986	0.022197865	18119.62174	0.000411456	16474.22095	71.98966033	3404.186624	0.865359324	0.324577405	486.1608902	5792.43281	0.8223	5.35E-05	18535.63262	4.63E-05	16043.78096	1.73E-05	6019.412502	0.881618988	72.83739472	507.7306008	6581.081527	0.8905	0.022399296	18114.39888	0.000414355	16324.92359	72.64447967	3584.876362	141.5959	134.7948	125.13	4.923190347	5.202527555	5.246112847
0.880314684	0.285901249	345.9265913	6153.523022	0.8405	5.76E-05	17292.71446	5.08E-05	15212.57551	1.63E-05	4981.887091	0.898311876	71.19040299	363.7859888	7034.028879	0.9107	0.021907676	16925.31119	0.000410801	15534.49016	71.03317029	2735.388273	0.876277941	0.327069028	344.3027346	6019.13396	0.8301	5.76E-05	17320.12264	5.04E-05	15182.15123	1.89E-05	5631.310445	0.876031057	73.41806247	353.4775917	6434.806021	0.8836	0.022577814	16914.63773	0.000420527	15149.21402	73.21175923	3578.572091	137.57	129.9157	119.5407	6.815504383	7.239571362	7.497489147
0.812305578	0.574473719	817.2552628	4641.493579	0.7553	5.29E-05	18650.57514	4.30E-05	15150.23162	3.04E-05	10713.18284	0.827850614	78.98954789	857.8067574	5280.653622	0.8228	0.024237343	18200.90301	0.000441189	15435.62651	78.62167722	6860.913466	0.803356261	0.687449173	797.5248035	4427.882895	0.7378	5.29E-05	18643.69463	4.25E-05	14975.14711	3.63E-05	12849.27257	0.823143614	79.48031303	847.6436782	5184.267547	0.8178	0.024385215	18195.21301	0.000443384	15342.62784	79.10236776	7049.19418	141.5237	135.5957	127.3512	2.592072204	2.689989128	2.764391173
0.876708072	0.308855292	466.8771298	6047.334773	0.8334	5.46E-05	18172.54284	4.79E-05	15922.30477	1.67E-05	5636.605952	0.89362725	71.68767275	492.1197347	6901.350691	0.9045	0.022054396	17791.92195	0.000410176	16255.01147	71.52007548	3039.441459	0.872479504	0.324317798	465.6104806	5944.036948	0.8282	5.45E-05	18184.23171	4.76E-05	15866.77512	1.76E-05	5914.506279	0.876645981	73.42123133	478.7179719	6446.059077	0.8836	0.022574811	17767.8711	0.000417875	15923.0238	73.21175875	3825.042666	140.726	133.348	123.6449	5.047209526	5.289924007	5.495816954
0.875832315	0.306381958	487.1621881	6033.904511	0.8336	5.29E-05	18747.0487	4.63E-05	16424.25339	1.62E-05	5732.741483	0.893819798	71.63013699	508.9339373	6909.335616	0.9052	0.022035814	18332.52176	0.00040848	16750.40093	71.46476792	3093.975254	0.873725896	0.313019391	479.2601469	5978.115741	0.8303	5.29E-05	18752.45586	4.62E-05	16392.90116	1.66E-05	5845.902686	0.876070736	73.34667571	496.9654003	6440.628223	0.8844	0.022552865	18309.44957	0.000416099	16396.26019	73.14553297	3786.309475	142.7663	135.3255	126.0333	5.154850561	5.287073836	5.302885168
0.812387394	0.588157196	939.6980882	4629.043548	0.7532	5.19E-05	19018.82939	4.22E-05	15447.49979	3.05E-05	11201.66091	0.821765491	79.47273172	978.5796038	5165.064319	0.8178	0.024384175	18563.47261	0.000442429	15629.75999	79.10236697	7043.317926	0.787055734	0.708333333	907.8832781	4171.629967	0.7248	5.19E-05	19027.23689	4.08E-05	14978.26699	3.68E-05	13464.84906	0.826359895	79.30697901	974.5900439	5239.65959	0.8196	0.024330742	18562.71816	0.0004418	15713.33371	78.92864335	7191.260737	143.0046	136.8991	128.3651	2.279074119	2.276031456	2.411307112
0.808764677	0.569738067	884.3237601	4578.750033	0.7521	5.32E-05	18570.59567	4.30E-05	15019.41518	3.03E-05	10563.88778	0.82451378	79.18666992	924.112465	5220.834288	0.8207	0.024299462	18118.57488	0.000442231	15304.46905	78.82285349	6756.491775	0.794582423	0.692939245	862.9022989	4288.216475	0.7308	5.31E-05	18572.51108	4.22E-05	14761.99014	3.68E-05	12864.70785	0.820870341	79.78080511	917.7110947	5134.330633	0.8148	0.02447503	18115.72202	0.00044493	15234.56149	79.39361412	7177.086524	141.024	135.4634	126.9592	2.601311977	2.682435543	2.69372147
0.810691501	0.607561235	793.977902	4597.207135	0.7512	5.35E-05	18464.39776	4.33E-05	14968.93709	3.24E-05	11232.82668	0.830023159	78.50942484	837.0082165	5341.40551	0.8276	0.024097607	18021.413	0.000439457	15319.69105	78.16567808	6354.726438	0.805776248	0.614713384	786.0046986	4498.794335	0.7449	5.35E-05	18467.05276	4.31E-05	14879.92594	3.29E-05	11347.90442	0.83064826	78.57533253	836.0140266	5346.91971	0.827	0.024115051	18021.08295	0.000439776	15331.30055	78.22238885	6525.38162	140.4692	135.2618	125.87	2.754641784	2.855216412	3.010597947
0.889608164	0.263232181	249.1994825	6378.321807	0.8502	5.78E-05	17479.70948	5.14E-05	15576.23719	1.52E-05	4562.429428	0.897758598	71.23005933	263.0608657	7019.555043	0.9102	0.021919845	17093.31532	0.000411059	15701.73003	71.07219113	2719.416062	0.876255938	0.322654462	248.0719017	6020.369866	0.8303	5.78E-05	17462.29206	5.07E-05	15309.84825	1.87E-05	5599.84608	0.895865786	71.49663689	261.8790385	6961.055794	0.9069	0.021999445	17077.90539	0.000412337	15645.33498	71.33080682	2873.44393	138.4587	130.2345	119.3681	10.18254852	10.36009217	10.44910534
0.815237571	0.582362288	752.7057733	4674.646981	0.7552	5.42E-05	18206.46544	4.42E-05	14845.40004	3.16E-05	10589.91949	0.828383685	78.59162937	792.4757469	5312.767509	0.8267	0.024124543	17765.49389	0.000440445	15072.97487	78.25077451	6200.191968	0.804958349	0.609435732	749.3905643	4497.485458	0.7461	5.42E-05	18209.59523	4.36E-05	14662.5276	3.31E-05	11077.27074	0.834726731	77.80249132	803.4402923	5455.561744	0.8349	0.02388814	17768.01341	0.000436911	15185.73665	77.48223079	5831.028027	139.6104	134.1842	124.8212	2.95096795	3.078030273	3.188640864
0.828337042	0.512833809	629.673062	4939.812808	0.7714	5.42E-05	18256.87192	4.49E-05	15120.48982	2.76E-05	9399.300233	0.855723936	75.7005597	678.0093284	5921.668843	0.8576	0.023257196	17836.10833	0.000427625	15615.2559	75.43133449	4926.327076	0.836696062	0.500577145	640.4967295	5102.460049	0.7797	5.42E-05	18254.6541	4.54E-05	15264.39902	2.70E-05	9150.023342	0.842576945	77.16300345	674.784959	5614.411429	0.8417	0.023695518	17824.68112	0.000434132	15368.78105	76.85625986	5617.487347	140.5604	133.9013	124.3738	3.967537251	4.04031661	3.98821684
0.855337661	0.410186335	372.4857143	5527.835528	0.805	5.67E-05	17553.72571	4.86E-05	14986.75517	2.29E-05	7306.31913	0.868125415	74.44345033	390.3191099	6219.948383	0.8718	0.022881684	17169.91294	0.000424284	15231.13594	74.20269755	4278.654737	0.84546268	0.453924915	367.5592213	5295.907344	0.7911	5.67E-05	17555.74668	4.80E-05	14822.03392	2.52E-05	8111.712931	0.865757665	74.47779181	393.046597	6175.805234	0.8713	0.022894808	17159.89487	0.000424417	15170.75813	74.24527868	4136.340755	138.4005	131.1466	120.6075	6.296737231	6.621609203	6.749225419
0.808087589	0.595523581	768.5139888	4563.322142	0.7506	5.41E-05	18230.85145	4.38E-05	14726.40977	3.22E-05	10878.42739	0.828845201	78.93296089	807.192616	5298.414379	0.8234	0.02422089	17798.35706	0.000441953	15109.48892	78.5643872	6720.231601	0.791482381	0.690809328	744.4406036	4244.412346	0.729	5.41E-05	18241.70274	4.28E-05	14440.00763	3.74E-05	12591.34129	0.827988162	78.93878295	806.2712256	5286.005223	0.8233	0.024223835	17795.36718	0.000441966	15090.4098	78.57392959	6662.885339	140.4109	133.8339	125.5557	2.938343273	2.771950719	2.932899165
0.837642702	0.455262823	398.5647194	5153.603029	0.7857	5.70E-05	17494.89691	4.77E-05	14668.37046	2.60E-05	7943.028637	0.860981953	75.17672264	417.8616097	6045.531094	0.8635	0.023101569	17058.9714	0.000427924	15013.64022	74.91593831	4582.116155	0.850754836	0.429430935	395.3845575	5414.493858	0.7978	5.72E-05	17454.1652	4.87E-05	14831.96252	2.42E-05	7565.170093	0.853944262	76.05785898	416.7025064	5868.731787	0.8538	0.0233633	17074.11537	0.000431691	14925.08915	75.76705796	5095.196065	138.3829	130.3795	120.5133	7.201158767	7.212536291	7.36403579
0.859192842	0.365739601	345.4858479	5634.579867	0.8126	5.63E-05	17731.45939	4.84E-05	15217.4166	2.03E-05	6543.449175	0.878510962	73.28987799	362.6281066	6490.056484	0.8852	0.022535779	17340.61252	0.00041885	15565.15962	73.07942875	3769.6777	0.866573054	0.365394028	340.5190896	5778.857073	0.8172	5.63E-05	17733.74254	4.89E-05	15350.9865	2.03E-05	6532.204723	0.87422683	73.5427956	365.3922458	6392.751049	0.8821	0.022614791	17331.91214	0.000419928	15476.54272	73.33625451	3704.281147	138.5375	131.9043	122.4945	7.215690802	7.364912865	7.529818706
0.833039763	0.472617673	540.25202	5053.940105	0.7797	5.64E-05	17584.4344	4.70E-05	14639.91901	2.64E-05	8368.902398	0.85253388	76.11124136	562.8576955	5841.67706	0.8531	0.02338179	17166.15438	0.000431432	14959.58172	75.82922685	5002.376509	0.836271753	0.483548841	532.8860581	5105.641147	0.7811	5.64E-05	17572.51824	4.73E-05	14677.37618	2.70E-05	8581.567661	0.854474538	76.07450797	563.1173852	5876.233599	0.8536	0.023368117	17170.44154	0.000431296	15001.93578	75.78480997	5141.08224	137.1625	132.0117	122.7597	5.176050014	5.23155456	5.589360957
0.890992474	0.252752401	389.3445772	6425.806512	0.8538	5.42E-05	18357.75182	4.83E-05	16344.89304	1.36E-05	4674.212696	0.90342578	70.65035422	408.1226158	7182.503215	0.9175	0.021742321	17978.98518	0.000405267	16598.34369	70.50671076	2635.488828	0.888000063	0.275410223	389.5574312	6329.942746	0.8471	5.42E-05	18356.37009	4.82E-05	16287.47042	1.48E-05	5095.342226	0.885620019	72.593061	396.7723559	6676.181421	0.8935	0.02232492	17953.60381	0.000413942	16246.39329	72.40056995	3554.055848	141.2606	134.0157	124.5423	6.355429776	6.483444571	6.646413372
0.874169005	0.31561222	227.987491	5992.005292	0.8314	5.83E-05	17449.29613	5.10E-05	15242.87987	1.81E-05	5538.829444	0.890494355	72.15340972	240.4386472	6803.647903	0.8989	0.022195156	17056.09011	0.000415698	15516.91058	71.9656353	3356.433419	0.873871625	0.328421307	228.6052663	5965.337722	0.8279	5.81E-05	17487.80903	5.08E-05	15291.98264	1.93E-05	5674.397512	0.882580606	72.69670477	239.2604797	6609.429724	0.8922	0.022361251	17095.28962	0.000417752	15440.40473	72.5060636	3297.624972	138.1906	130.2727	119.088	11.40484422	11.85184098	12.04275948
0.885353436	0.297329377	333.7323442	6252.835015	0.8425	7.94E-05	12885.89507	7.09E-05	11341.90666	2.20E-05	4023.307774	0.896944124	71.4995038	350.3553865	6983.645055	0.9069	0.022020395	12616.3523	0.000432053	11510.76719	71.3308095	2312.554526	0.885699222	0.291562834	333.3474546	6261.298564	0.8427	7.95E-05	12867.38851	7.10E-05	11322.27795	2.12E-05	3997.286223	0.896007661	71.42855569	348.2074474	6969.226066	0.9077	0.022001054	12619.89523	0.000431682	11500.43604	71.26794168	2188.604715	119.613	112.8442	99.558	10.1410567	9.752083181	9.53303918
0.868860256	0.350298308	419.8720321	5841.402289	0.8213	7.22E-05	13824.15244	6.30E-05	11975.93328	2.45E-05	4963.446853	0.867307289	74.56571691	429.5045956	6197.146599	0.8704	0.022933595	13510.92682	0.000438494	11951.6846	74.32205285	3458.297794	0.85324665	0.402691253	412.2960379	5481.661849	0.8026	7.23E-05	13807.12098	6.20E-05	11735.19753	2.80E-05	5736.361326	0.886961397	72.56594697	442.6482828	6704.202819	0.8939	0.0223325	13530.52735	0.00042989	12243.49379	72.36817581	2804.660588	124.2267	116.6104	104.1058	6.432457315	6.652789779	6.590933649
0.878128975	0.306254493	416.9930506	6079.10496	0.8346	7.19E-05	13934.20728	6.34E-05	12197.28623	2.12E-05	4396.185358	0.870629396	74.41687686	417.4732859	6267.016739	0.8722	0.022886148	13606.99897	0.0004378	12071.76965	74.168671	3582.680807	0.865334595	0.344242276	408.273904	5770.296617	0.8189	7.19E-05	13917.89486	6.26E-05	11991.99209	2.37E-05	4953.072658	0.89127611	72.01043749	438.0366422	6829.877859	0.9006	0.022166537	13642.1268	0.00042718	12399.79105	71.82979264	2589.603042	124.3563	117.2588	104.3951	7.052712266	7.115013883	7.17912223
0.767062245	0.863402062	871.3270332	3814.669817	0.6984	7.22E-05	13633.39075	5.54E-05	10451.77045	6.22E-05	11793.48411	0.791022779	83.84058717	920.4089621	4524.988926	0.7766	0.025694917	13279.9463	0.000478205	10769.33507	83.29890575	7426.812902	0.751444203	0.946643213	845.2272061	3579.55409	0.6822	7.22E-05	13633.09015	5.43E-05	10238.27807	6.82E-05	12929.42436	0.790900199	83.32010243	932.109347	4549.001024	0.781	0.025550543	13285.75826	0.000475805	10771.40622	82.82961279	6704.206402	121.3307	116.2417	105.1378	2.285899716	2.476748092	2.441067627
0.882056264	0.29645965	348.781142	6173.488258	0.8389	7.58E-05	13295.10204	6.71E-05	11686.93391	2.13E-05	4103.310168	0.881624473	72.73264551	363.06482	6588.72973	0.8917	0.02239093	13005.67747	0.000433695	11681.59709	72.54672191	2574.688124	0.876336117	0.324900614	344.3593543	6020.312131	0.8301	7.58E-05	13289.6545	6.68E-05	11594.50357	2.35E-05	4460.210336	0.897104378	71.34132923	370.4174736	6998.415933	0.9088	0.021970917	13031.70147	0.000427756	11921.09777	71.18167973	2192.887874	121.6618	114.3822	101.7636	8.269559889	8.171506786	8.387330627
0.770830933	0.87110603	749.7387825	3859.343527	0.6998	7.16E-05	13926.81981	5.56E-05	10676.78322	6.04E-05	12393.49328	0.795766706	83.28889458	795.5186796	4610.750512	0.7816	0.025530239	13585.89214	0.000475564	11039.78778	82.76602896	7457.176049	0.757827066	0.935897436	728.9513403	3659.573427	0.6864	7.16E-05	13918.94959	5.48E-05	10484.97205	6.48E-05	13336.64088	0.795852324	83.64560051	804.468465	4592.703019	0.7785	0.025631603	13585.62376	0.000477218	11041.9198	83.09560646	7835.63982	123.5261	117.3421	106.0129	5.185414042	5.427915584	5.573915463
0.867237947	0.380754163	388.5433399	5786.263957	0.8168	7.26E-05	13717.69332	6.30E-05	11880.28553	2.71E-05	5307.725392	0.857263915	75.83148429	394.9936938	5938.841177	0.8563	0.023310457	13387.43606	0.000444254	11718.25496	75.545857	3995.228191	0.873348603	0.332044466	392.678347	5954.383035	0.8276	7.26E-05	13715.81767	6.35E-05	11960.44717	2.36E-05	4629.369623	0.895078257	71.74764908	417.1059852	6926.279566	0.9039	0.022086652	13418.8751	0.000426748	12261.47971	71.56755343	2517.70572	122.7353	115.9646	105.0528	6.17901561	6.354238494	6.200888014
0.872413825	0.335027223	368.7950393	5932.017302	0.8265	7.34E-05	13564.93285	6.42E-05	11812.17245	2.41E-05	4617.826134	0.859671089	75.33491935	371.7130092	6012.386561	0.8617	0.023165602	13249.65928	0.000442683	11633.08585	75.07243385	3631.065916	0.877326704	0.329561868	370.5204622	6041.179345	0.8308	7.34E-05	13562.40202	6.45E-05	11875.75662	2.37E-05	4542.482065	0.894324514	71.66666667	389.8229443	6916.871353	0.9048	0.022065505	13283.09118	0.000426975	12134.20957	71.49636506	2344.76481	122.194	115.4433	103.8098	6.46196286	6.513676774	6.398110968
0.87424262	0.320318149	371.7317426	5983.301277	0.8298	7.35E-05	13601.7926	6.45E-05	11853.21664	2.27E-05	4499.758014	0.882328157	73.05900901	382.4486486	6579.207658	0.888	0.022481706	13300.81182	0.000433234	11962.93792	72.84900132	2953.289865	0.86849715	0.348990022	368.20954	5838.460939	0.8218	7.35E-05	13596.58627	6.41E-05	11767.61423	2.47E-05	4901.810294	0.892699835	71.81980286	394.4643925	6872.733747	0.9029	0.022111787	13325.24244	0.000427717	12134.01798	71.64681709	2411.836859	123.0201	115.9035	102.7866	6.979548409	7.132824668	7.076627759
0.730966103	1.001801261	1040.691084	3322.394776	0.6662	6.71E-05	14669.45647	4.91E-05	10712.43801	6.69E-05	14757.6435	0.76661156	87.69553523	1101.934373	4059.528241	0.7436	0.026827017	14280.24623	0.000491198	11233.37038	86.99560891	10309.47539	0.728925949	1.120797201	1043.122623	3254.111213	0.6573	6.71E-05	14671.55743	4.90E-05	10683.29091	7.50E-05	16491.47893	0.780009671	84.90350763	1143.143174	4340.518842	0.7669	0.026013991	14292.90911	0.000478733	11431.07033	84.35249477	8116.385969	126.7	120.2564	108.6294	2.277630348	1.886281803	2.161540108
0.87376073	0.332206663	358.3597296	5965.943023	0.8284	7.54E-05	13537.00109	6.64E-05	11760.92456	2.33E-05	4733.790198	0.877706087	73.66522874	369.5274151	6449.230219	0.8809	0.022664212	13228.77546	0.000437817	11805.24857	73.43616077	3296.286525	0.871418855	0.347741622	354.6058766	5897.44439	0.8236	7.56E-05	13501.67727	6.66E-05	11673.06117	2.41E-05	5002.897402	0.889137077	72.23131752	381.6684486	6771.290233	0.8979	0.022236335	13267.04199	0.000431336	12011.32357	72.0457865	2646.590378	122.7335	115.7279	101.5847	10.20111159	9.638032039	9.466045949
0.872979307	0.356561855	387.3894622	5923.383149	0.8237	7.42E-05	13469.92849	6.51E-05	11719.89446	2.56E-05	4941.091053	0.876653843	73.59732305	400.4491833	6434.206216	0.8816	0.022645171	13162.0363	0.000436251	11756.88253	73.3778513	3069.84029	0.873043273	0.319903498	389.1425814	5958.521592	0.829	7.44E-05	13450.53486	6.53E-05	11689.31447	2.27E-05	4469.836188	0.892503676	71.80279039	413.98483	6869.801462	0.9031	0.022107704	13190.86192	0.000428403	12004.58072	71.63095015	2385.014727	121.8448	115.647	102.0942	7.014992014	7.054019492	7.296144623
0.745837859	1.051778009	921.7406636	3475.875167	0.6721	6.82E-05	14509.3675	5.11E-05	10790.04976	7.07E-05	15415.43044	0.774748243	85.98271084	999.2431041	4228.364128	0.7577	0.02633002	14138.41349	0.000484466	11218.65485	85.37670695	8879.152699	0.743165848	1.172705314	906.950785	3396.097222	0.6624	6.82E-05	14512.07896	5.09E-05	10755.74596	7.89E-05	17169.00755	0.783379651	85.02480094	1009.140713	4373.026106	0.7661	0.026042051	14145.18705	0.000480292	11348.49577	84.44058226	8561.638037	125.6902	119.7038	108.6235	3.419652608	3.616001322	3.137602229
0.867482189	0.357247438	348.988775	5808.319668	0.8196	7.58E-05	13327.19046	6.60E-05	11515.78615	2.60E-05	4915.057955	0.87093321	74.46977171	355.3914191	6268.685213	0.8717	0.022902923	13034.99598	0.000441263	11575.86929	74.21121527	3559.325456	0.865273487	0.370420292	346.1545154	5751.031614	0.8161	7.58E-05	13330.71878	6.59E-05	11490.46365	2.70E-05	5075.188825	0.887978941	72.3191347	370.750669	6742.087868	0.8968	0.022263904	13063.42484	0.000431883	11832.35206	72.13415718	2522.794603	121.6822	114.6938	101.3706	8.497187956	8.715012425	8.967477663
0.867053183	0.353508237	370.9194631	5801.041245	0.8195	7.44E-05	13509.79048	6.47E-05	11674.9544	2.53E-05	4919.277364	0.86652934	74.92567802	375.3882285	6159.061858	0.8665	0.023038549	13206.94241	0.00044194	11673.78855	74.6565686	3743.818927	0.868121089	0.363536451	367.5402369	5814.248748	0.8189	7.44E-05	13507.11625	6.48E-05	11684.86068	2.60E-05	5057.585053	0.887111041	72.35758117	391.4772955	6722.260292	0.8963	0.022274945	13236.47439	0.000430799	11979.8857	72.17439679	2526.873703	122.4683	115.5045	102.1709	7.749102858	7.860736591	8.122222183
0.747520188	0.989969022	864.6559965	3522.765157	0.6779	6.76E-05	14583.2046	5.06E-05	10884.6183	6.64E-05	14528.56424	0.782871659	85.22501308	911.3307169	4357.543956	0.7644	0.026099353	14200.13579	0.000480784	11388.59827	84.62837591	8770.596939	0.759486069	0.960910152	857.6292299	3669.059218	0.6856	6.77E-05	14567.92882	5.15E-05	11038.20706	6.43E-05	14146.79945	0.794766312	83.32360471	946.3471582	4595.684588	0.7812	0.025539515	14210.68011	0.000472368	11565.24068	82.80840626	7571.236559	125.7236	120.1147	108.9414	2.566242981	2.764298086	2.933081322
0.888089752	0.279641001	350.9388285	6329.005668	0.8468	7.61E-05	13186.44532	6.79E-05	11676.17106	2.04E-05	3806.634388	0.882793521	72.8690182	357.7685913	6601.34262	0.8902	0.022428908	12898.50191	0.000434691	11610.80107	72.66896541	2723.495956	0.883634218	0.286987522	349.2300654	6217.498633	0.8415	7.62E-05	13173.78217	6.76E-05	11597.53705	2.09E-05	3925.33167	0.90498748	70.48477599	372.4419313	7228.721618	0.9196	0.021714213	12915.31253	0.000424535	11914.46884	70.34570393	1895.511635	120.7441	113.9287	101.7313	7.998238255	7.552841605	7.85404993
0.883187426	0.279478055	385.6118624	6218.998339	0.843	7.41E-05	13482.74686	6.57E-05	11869.30552	1.99E-05	3901.511981	0.883781977	72.77785257	395.5773589	6626.914283	0.8913	0.022399338	13188.96241	0.000432505	11882.09391	72.57928039	2768.615954	0.881040764	0.29295338	385.8816025	6154.806367	0.8387	7.40E-05	13492.06117	6.54E-05	11853.78225	2.10E-05	4057.702754	0.903453054	70.61132898	408.364488	7185.655556	0.918	0.021749918	13215.56743	0.00042315	12176.11015	70.46831088	1983.934749	122.4633	115.157	102.9864	6.924525479	6.951701303	7.125546649
0.829057266	0.529548989	453.5857957	4950.503629	0.7716	7.09E-05	13996.38802	5.90E-05	11567.48189	3.66E-05	7583.467081	0.850737513	76.49240372	481.8995407	5787.92969	0.8491	0.023505856	13666.88011	0.000445624	11864.07658	76.18645363	4422.312448	0.844673842	0.470543423	461.5091417	5262.909599	0.7876	7.11E-05	13971.36478	6.03E-05	11746.82086	3.22E-05	6788.981082	0.864457189	75.02149544	493.2824454	6116.249509	0.8653	0.023067097	13676.19219	0.000439373	12059.829	74.7601011	3775.641165	123.5696	117.6716	106.1018	5.594707842	5.556469512	5.726398236
0.891777003	0.256211908	326.8445851	6436.428036	0.8532	7.71E-05	13040.56024	6.89E-05	11608.27429	1.91E-05	3418.496718	0.887195499	72.34300056	333.3730061	6724.616062	0.8965	0.022272871	12735.93642	0.000433396	11517.07648	72.15829585	2491.297936	0.888734314	0.273712737	327.8233769	6352.455402	0.8487	7.71E-05	13031.21397	6.87E-05	11553.52245	2.04E-05	3669.132202	0.908529962	70.16661254	347.1301288	7330.134134	0.9237	0.021619102	12768.11822	0.000424016	11833.08648	70.03346239	1778.045036	119.658	113.1379	101.7326	7.865318557	8.105114656	8.40753812
0.801000307	0.618419281	611.6761815	4434.171402	0.7427	0.000108059	9113.123603	8.65E-05	7299.872615	6.70E-05	5624.321395	0.827612603	78.65161603	644.4695557	5298.402252	0.8261	0.024194691	8883.121535	0.000485419	7522.541116	78.30762689	3147.655611	0.788666721	0.751942286	583.8884573	4163.534406	0.7208	0.000108215	9101.959767	8.55E-05	7170.458775	8.11E-05	6865.267481	0.820597214	79.88695011	635.0879823	5124.574834	0.8138	0.024558683	8884.323421	0.000490557	7465.330075	79.49119536	3608.344556	97.7734	95.991	88.0818	3.409259808	3.663675613	3.878003192
0.811756417	0.567417219	671.722649	4632.913377	0.755	0.000118968	8270.550199	9.67E-05	6709.181794	6.70E-05	4717.630331	0.831705592	78.49794636	710.0560522	5366.733752	0.8278	0.024155666	8075.777603	0.000493892	6877.302762	78.14681612	2915.462431	0.812049493	0.600585807	668.7662096	4611.395953	0.7511	0.000118977	8270.420583	9.68E-05	6707.804893	7.12E-05	4973.552124	0.837022799	77.6722468	714.7072821	5497.429033	0.8363	0.023911425	8073.164773	0.000490637	6912.514603	77.35254285	2658.452948	92.1335	91.5381	85.1331	3.275466036	3.226197203	3.672408527
0.850268679	0.400873362	385.1629445	5431.395508	0.8015	9.89E-05	10062.01447	8.43E-05	8534.085068	3.87E-05	4128.115159	0.851751111	76.18455943	395.4350581	5824.026634	0.8523	0.023445145	9830.409832	0.000468052	8548.605267	75.90041461	2922.501467	0.863427432	0.369519833	391.8927914	5710.915019	0.8143	9.90E-05	10056.72185	8.57E-05	8655.366977	3.57E-05	3799.899423	0.874945691	73.68733674	409.8024986	6395.999659	0.8805	0.022697432	9836.278592	0.000458072	8778.593835	73.46952691	2247.058262	104.328	99.8605	91.8882	5.941381657	6.162340444	5.786579366
0.815308151	0.599258376	426.0806516	4675.655807	0.7551	9.90E-05	10038.27718	8.08E-05	8178.6775	5.93E-05	6020.590783	0.829028656	79.00413273	443.8469673	5296.832746	0.8227	0.024285349	9787.816458	0.000479703	8299.777549	78.63125096	3767.437948	0.81410777	0.562103594	430.3477801	4671.17389	0.7568	9.90E-05	10032.70653	8.07E-05	8158.815459	5.53E-05	5680.31805	0.839346699	77.48985922	454.2543546	5543.689812	0.8382	0.023837938	9806.093534	0.000473123	8425.264142	77.17719631	3140.062754	103.3834	100.0403	92.2162	6.234966274	5.503660228	6.105199224
0.792926322	0.711617687	594.9475419	4255.078001	0.7282	8.97E-05	10990.02499	7.12E-05	8708.25702	6.35E-05	7853.210656	0.820786282	80.0885577	633.1652913	5115.398079	0.8119	0.024597996	10713.93952	0.000476497	9000.431968	79.67721355	4558.428501	0.798107405	0.65012205	599.511527	4368.151614	0.7374	8.98E-05	10983.85815	7.18E-05	8755.732246	5.79E-05	7184.431787	0.822765281	79.81635158	636.4569114	5158.799411	0.8146	0.024516758	10715.41345	0.000475329	9023.47511	79.41312196	4474.647925	109.0738	104.5506	94.8792	3.476399511	3.807392761	4.328926814
0.787439822	0.700937155	772.7480706	4181.596196	0.7256	0.000108362	9071.605292	8.54E-05	7138.104422	7.54E-05	6400.663175	0.817644932	80.13422902	829.8642919	5069.068039	0.8113	0.024634223	8849.743621	0.000491677	7407.623527	79.7361454	3632.486626	0.793108592	0.683301344	777.2086647	4262.15739	0.7294	0.000108442	9064.911023	8.62E-05	7177.376824	7.35E-05	6238.359336	0.811424895	80.93030492	810.7555694	4938.545488	0.8035	0.024872291	8849.76565	0.000494887	7354.590297	80.5101884	3826.890479	97.4009	95.7723	88.9216	2.785745715	2.795434261	3.040206151
0.808353252	0.599305463	715.595165	4552.70589	0.7487	0.000123708	7940.908375	0.000100064	6415.904692	7.38E-05	4778.579004	0.821474233	79.5705191	752.5181195	5154.555338	0.8168	0.024484017	7750.147649	0.000501914	6519.757875	79.19923775	2956.213516	0.799789097	0.66644031	703.9156594	4378.768029	0.7363	0.000123628	7945.733261	9.89E-05	6354.763952	8.22E-05	5304.189325	0.830423008	78.69096634	758.8881085	5335.863405	0.8258	0.024218524	7752.522039	0.000498645	6591.959298	78.33608149	2828.021676	90.6078	89.8372	83.0716	2.857792708	2.89397584	3.367057089
0.802959328	0.652220872	422.744836	4442.185095	0.7407	0.000118265	8381.562576	9.48E-05	6741.048294	7.77E-05	5418.351424	0.814546106	80.33959466	444.2088482	5015.215522	0.8092	0.02470777	8159.202916	0.000500561	6811.750155	79.943077	3320.201557	0.78851731	0.718663722	407.6626173	4184.935947	0.7244	0.000118422	8372.817366	9.33E-05	6608.742306	8.53E-05	5986.667035	0.82388444	79.46210269	445.8222494	5195.125183	0.818	0.024443084	8174.079462	0.000497085	6908.786978	79.08305244	3146.231174	94.0863	91.6711	84.0425	5.486661308	5.126785035	4.8324418
0.805370913	0.611260054	762.2426273	4502.545576	0.746	0.000123658	7941.584718	9.96E-05	6395.408788	7.52E-05	4871.698525	0.836760965	77.94853029	821.2908218	5476.011638	0.8335	0.023995914	7752.597361	0.000495763	6640.55208	77.61239902	2671.781164	0.80046428	0.636216216	756.4118919	4409.630541	0.74	0.000123656	7941.949324	9.90E-05	6355.419605	7.84E-05	5061.169459	0.827152449	79.07008152	805.9081397	5264.808736	0.8219	0.024332745	7756.373038	0.000499953	6574.90249	78.70779517	2871.063998	89.9129	89.8498	83.2506	2.986521989	2.806107617	3.04634201
0.79903112	0.592522862	839.2794513	4417.100861	0.7436	0.000105126	9343.664874	8.41E-05	7460.289185	6.20E-05	5559.878698	0.828051979	78.93805417	885.5261751	5286.495688	0.8233	0.02427354	9123.692822	0.000484139	7737.202693	78.57394806	3409.008017	0.806201457	0.648325037	837.8424593	4494.164537	0.7433	0.000105118	9344.415445	8.48E-05	7528.700358	6.79E-05	6081.232342	0.831118064	78.56977025	891.1903265	5352.839178	0.827	0.024165432	9122.654534	0.000482719	7762.568901	78.22240639	3256.483555	97.2404	97.2968	91.257	2.563943806	2.457419329	2.708311467
0.801213219	0.623028179	720.3638938	4428.145477	0.7417	0.000109749	8959.691115	8.80E-05	7177.670293	6.83E-05	5581.505056	0.824984109	79.32706859	759.6875763	5219.435929	0.8194	0.024393138	8743.212106	0.000489562	7388.830473	78.94793028	3396.031486	0.790985397	0.642915643	707.5110565	4260.413868	0.7326	0.000109747	8961.079853	8.68E-05	7087.895917	7.05E-05	5754.613022	0.824585603	79.54845815	752.2853647	5199.943465	0.8172	0.024458518	8742.304209	0.000490609	7384.214717	79.16046842	3473.338228	96.5861	95.2689	87.8311	2.928171236	3.108985814	3.342061159
0.777898414	0.779087719	802.2039298	4004.860772	0.7125	8.38E-05	11741.74218	6.53E-05	9125.222818	6.49E-05	9202.866246	0.807461409	81.64023089	866.433555	4847.530556	0.7969	0.025053483	11450.29816	0.000478024	9469.936047	81.17697419	5473.540846	0.774796756	0.841657208	803.4858116	3926.292281	0.7048	8.38E-05	11740.52057	6.50E-05	9087.434331	7.01E-05	9941.812429	0.809964288	81.39264264	861.4822322	4894.218969	0.7992	0.024981629	11450.95058	0.000477054	9500.251526	80.94335568	5313.445946	112.738	108.051	97.7829	2.57875086	2.757643741	2.954279538
0.807757067	0.624631071	715.3581969	4524.923263	0.7454	0.000112863	8709.350416	9.12E-05	7035.521229	7.02E-05	5462.650255	0.823743687	79.42082111	748.8707234	5195.807185	0.8184	0.024425884	8495.410313	0.000492543	7165.898301	79.0443971	3293.700024	0.802885796	0.643291447	702.6070801	4436.973787	0.7401	0.000112879	8708.264424	9.07E-05	6989.257796	7.23E-05	5620.375084	0.827988697	79.09856413	754.7634461	5277.098321	0.8218	0.024325276	8497.316014	0.000491338	7204.669817	78.7173706	3337.20735	94.1331	93.8746	87.9339	2.97445531	2.942120806	3.171077229
0.805703814	0.669685093	420.0631166	4467.817408	0.7399	0.000114349	8671.249088	9.22E-05	6981.983254	7.65E-05	5797.626031	0.830460948	78.56111716	449.6577197	5344.384113	0.8271	0.024171502	8468.73123	0.00049021	7205.324521	78.21295231	3016.45182	0.786050268	0.760757555	406.1446874	4119.527782	0.7181	0.000114558	8656.871884	9.03E-05	6791.541649	8.63E-05	6637.084529	0.827952741	78.79265187	449.6593913	5294.050321	0.8247	0.024241621	8458.717231	0.000491265	7167.367626	78.44056389	3060.750576	95.8075	93.6257	84.3043	5.586935094	4.996678848	5.530434116
0.847890998	0.471917203	349.7868232	5337.855484	0.7923	1.00E-04	9998.905718	8.51E-05	8447.544823	4.54E-05	4878.767134	0.859736962	75.28810021	369.2447228	6016.687543	0.8622	0.023178002	9781.541754	0.000465275	8581.496185	75.02890466	2671.666783	0.861162248	0.382490752	359.2054254	5654.646609	0.811	9.99E-05	10000.809	8.63E-05	8581.98487	3.69E-05	3946.350801	0.878175419	73.39411765	379.900905	6476.421493	0.884	0.022608835	9789.613009	0.000457685	8770.307151	73.17864066	2228.186538	103.8979	99.9784	90.9895	6.781303384	6.758278881	6.702894132
0.858974095	0.389960435	277.9854105	5606.940158	0.8088	0.000104312	9859.702646	9.02E-05	8426.479158	3.82E-05	4012.572206	0.879836496	73.18862816	297.1080776	6522.321977	0.8864	0.022552225	9644.956115	0.000461143	8634.904325	72.98050308	2156.141697	0.883568032	0.327433628	287.6665869	6181.911983	0.8362	0.000104451	9845.053337	9.30E-05	8647.629515	3.14E-05	3426.570557	0.888373535	72.1064161	301.4023129	6765.225731	0.8993	0.022230149	9652.204715	0.000456627	8725.723286	71.93363176	1795.714	104.4483	98.1077	88.9437	9.687173329	9.628244944	9.421556682
0.808482972	0.586409061	590.8507662	4566.539507	0.7505	0.000118474	8312.081146	9.57E-05	6724.866113	6.99E-05	4842.198801	0.825297097	79.39228139	611.5490962	5220.055203	0.8188	0.024419427	8113.161089	0.00049698	6865.58416	79.00578632	3180.005618	0.801745416	0.67109905	576.4705563	4404.664315	0.737	0.000118472	8312.738535	9.49E-05	6669.219419	8.00E-05	5537.282768	0.829088537	78.83139253	616.3592916	5308.222222	0.8244	0.024254475	8106.318656	0.000494877	6886.365341	78.46911143	3001.655022	92.9489	91.6973	84.4993	3.631981386	3.607779471	4.142366414
0.834023901	0.513520474	336.9662632	5047.119495	0.7766	9.71E-05	10513.40832	8.18E-05	8691.535126	4.60E-05	5749.811743	0.851066683	76.75567108	358.8785444	5776.331522	0.8464	0.023606008	10283.1172	0.00046957	8893.871263	76.42949481	3681.402292	0.840727413	0.526423807	333.6626475	5157.201129	0.7796	9.74E-05	10482.82683	8.29E-05	8717.926551	4.64E-05	5960.242047	0.859543532	75.80471577	360.2272674	5979.507529	0.8567	0.023323498	10267.60955	0.000465985	8951.499385	75.51058955	3348.730011	107.3794	102.0693	93.3305	8.931486754	9.319629687	9.016411135
0.804821586	0.621825024	582.258433	4483.9195	0.7441	9.56E-05	10340.70085	7.72E-05	8297.669321	5.83E-05	6537.483268	0.839714394	77.57750179	630.5326009	5544.528302	0.8374	0.023857309	10104.41987	0.00047088	8669.358486	77.25092617	3439.803439	0.834048016	0.50727999	601.5177168	5044.317356	0.7761	9.57E-05	10331.51308	8.02E-05	8586.917905	4.72E-05	5365.986471	0.848399555	76.48386337	639.4299176	5750.307656	0.849	0.023532617	10110.33274	0.000466318	8764.089402	76.19543331	3041.266078	105.6034	101.4698	93.5404	4.448540035	4.399532698	4.66016822
0.800631322	0.652456354	570.092976	4405.806063	0.7389	0.00011097	8875.318176	8.88E-05	7107.608777	7.27E-05	5766.464204	0.829644573	78.7593019	602.4606714	5320.323961	0.8251	0.02422664	8657.901951	0.000488381	7356.418537	78.40253638	3156.879772	0.784748262	0.754488518	545.4990953	4109.159499	0.7185	0.000111117	8864.960195	8.72E-05	6954.409348	8.35E-05	6714.312178	0.817757665	80.04913188	595.5248122	5075.691294	0.8121	0.024612676	8654.446743	0.000493385	7251.964334	79.65759803	3468.575791	96.8702	94.4525	86.8439	3.528562308	3.725874897	4.133053688
0.789896706	0.700934579	809.5481034	4218.993128	0.7276	5.27E-05	18736.84469	4.16E-05	14796.03482	3.69E-05	13151.54632	0.815391973	80.3867458	863.8630069	5023.739862	0.8088	0.024655754	18273.15999	0.000447259	15261.50955	79.982588	7590.83593	0.790817168	0.819471488	799.2789986	4176.805007	0.719	5.27E-05	18738.24284	4.17E-05	14815.48225	4.31E-05	15380.49611	0.816498989	80.46739265	859.8172256	5034.169657	0.8081	0.024677066	18273.00111	0.000447665	15283.47142	80.05187185	7803.907808	141.3431	134.8477	135.4532	2.703217045	2.707896732	2.870715897
0.891612516	0.246692425	159.2550053	6439.775553	0.8541	0.000184189	9090.970964	0.000162039	8086.90045	5.23E-05	2286.379347	0.897221626	71.43450479	167.579707	6993.987992	0.9077	0.022104359	8888.985348	0.000524354	8129.876604	71.26796443	1568.759833	0.886354857	0.279592803	157.3162879	6286.157197	0.8448	0.000184473	9051.263494	0.000162429	7963.32294	6.12E-05	2603.362571	0.901579414	70.86401399	166.3592042	7127.388282	0.9148	0.021937371	8823.560232	0.000527523	8057.490749	70.7148287	1475.946436	87.0361	95.072	84.6206	33.90218572	23.8040126	31.53949676
0.780301417	0.7746676	996.9997201	4040.797901	0.7145	5.00E-05	19755.76389	3.90E-05	15412.2342	3.86E-05	15328.04563	0.801299555	82.70495553	1049.100889	4710.340788	0.787	0.025334583	19256.83647	0.000455499	15820.23857	82.19811929	10031.02313	0.770353953	0.909886641	962.8361314	3838.349978	0.6969	5.00E-05	19752.98005	3.85E-05	15211.41499	4.54E-05	18002.23318	0.803236686	82.10651186	1052.398788	4767.354366	0.7924	0.025162277	19259.49356	0.000452767	15857.55651	81.63795874	9272.878092	144.8765	138.5474	138.9371	2.111219494	2.06996455	2.143068732
0.79688436	0.634417344	724.9116531	4357.755285	0.738	6.84E-05	14433.96206	5.46E-05	11486.1155	4.30E-05	9227.570867	0.824363614	79.79322616	764.0978034	5182.864278	0.8149	0.024486868	14083.70217	0.000457667	11881.4045	79.38387846	5964.684501	0.792805653	0.700837107	705.3795801	4256.766433	0.7287	6.84E-05	14429.86291	5.43E-05	11420.43927	4.75E-05	10188.52944	0.818043765	80.48960396	756.4482673	5054.064356	0.808	0.024695391	14080.96782	0.00046066	11790.45115	80.06178637	6231.241213	124.4301	118.4055	118.3605	3.461721247	3.202790931	3.533516627
0.895851531	0.242953645	110.2625204	6545.616585	0.8586	0.000242945	7497.963429	0.000212439	6751.72936	7.74E-05	1663.928372	0.899733772	71.21946397	116.5663445	7062.609183	0.9104	0.022096455	7324.366213	0.000573085	6763.478065	71.0566241	1103.507579	0.890635907	0.275362319	108.5876046	6387.507836	0.8487	0.0002416	7477.136797	0.000209975	6669.190788	9.11E-05	1908.385177	0.906108472	70.40821204	117.0742994	7258.860308	0.9206	0.021857533	7273.901369	0.000575373	6729.074545	70.26932282	1018.178471	74.6899	86.2065	72.2767	34.96750975	25.65368702	32.87023482
0.900196835	0.221490468	148.951011	6671.387753	0.8655	0.000152914	7890.21398	0.000138812	7050.45016	3.02E-05	1930.595841	0.908724617	70.08597383	156.206229	7340.708013	0.9247	0.021669766	7734.067914	0.000493117	7131.62307	69.95773331	1116.951768	0.899175801	0.254016298	148.3161816	6610.819092	0.859	0.00015232	7884.409895	0.000137727	7028.798821	3.60E-05	2187.389057	0.911706527	69.84276323	156.0675719	7424.930812	0.9279	0.0215964	7723.830585	0.000493766	7138.213452	69.71647242	1123.172001	84.2599	90.9913	78.5909	22.26915697	14.85401038	20.27868677
0.803518148	0.591219382	901.7195824	4488.210547	0.7471	6.84E-05	14394.86428	5.50E-05	11557.8001	4.02E-05	8568.84915	0.817807554	80.05184091	936.808398	5076.454747	0.8121	0.02457111	14046.89681	0.000458607	11762.993	79.65758133	5702.303903	0.782847724	0.825769285	856.2347899	4049.049459	0.7117	6.84E-05	14395.56962	5.36E-05	11260.47521	5.62E-05	11943.63102	0.817240288	80.32699197	933.5074737	5052.908338	0.8095	0.024649813	14045.11785	0.000459865	11754.07518	79.91343148	5983.768993	124.1639	118.2472	117.824	2.409032335	2.354504653	2.592725207
0.7843109	0.721736718	840.7711194	4119.640866	0.7209	5.31E-05	18595.64849	4.16E-05	14585.16552	3.84E-05	13391.69219	0.811215309	81.14223331	887.3997505	4923.284467	0.8015	0.024880208	18129.16744	0.00045101	15073.02651	80.71106468	8015.842545	0.784502689	0.768063483	827.9717388	4106.355144	0.7183	5.31E-05	18601.09703	4.16E-05	14601.1098	4.08E-05	14267.5332	0.812167812	81.12272387	888.6944375	4938.301073	0.8018	0.02487091	18132.34335	0.000450891	15096.4643	80.68086655	8214.280369	140.5206	134.3319	134.9306	2.399661568	2.408722149	2.640110536
0.783246091	0.703693457	697.7843408	4122.602435	0.7229	6.63E-05	14869.29672	5.20E-05	11635.18895	4.63E-05	10529.01397	0.809290356	81.34792396	743.5815408	4887.104052	0.7996	0.024952088	14504.91608	0.000462603	12024.2861	80.90285577	6650.82954	0.76750403	0.894207273	673.4973408	3803.840017	0.6957	6.63E-05	14866.41685	5.10E-05	11395.71233	5.90E-05	13364.56605	0.803801444	82.27550891	728.6849159	4764.802251	0.7909	0.02522585	14497.96713	0.000466769	11936.23264	81.79279959	7206.963206	126.3176	120.0784	120.1792	2.958636551	2.867900528	2.908829208
0.804653373	0.627925747	580.81894	4477.162228	0.7434	5.65E-05	17527.49973	4.55E-05	14081.56061	3.51E-05	11102.31221	0.822737902	80.11863989	604.3431071	5140.974621	0.8117	0.024571539	17104.64556	0.000449358	14403.86647	79.6968327	7465.481335	0.790768077	0.790468251	556.7346116	4180.333333	0.7197	5.66E-05	17509.81353	4.49E-05	13811.34339	4.40E-05	14007.95137	0.824446955	79.6344929	612.988731	5193.348114	0.8164	0.02443044	17096.14294	0.000447193	14415.12886	79.23801815	7032.497918	136.4556	130.6107	130.7738	4.486761487	4.255037663	4.307601834
0.79532577	0.690794865	565.3881453	4305.261677	0.7322	6.60E-05	14977.92065	5.26E-05	11887.39487	4.48E-05	10512.90249	0.814968073	80.57496902	593.3194548	5006.826766	0.807	0.02472352	14623.17485	0.000458979	12192.54503	80.16099352	6267.864436	0.792328963	0.725506408	552.206008	4232.162188	0.7257	6.60E-05	14982.99173	5.24E-05	11848.60546	4.72E-05	11004.63167	0.825031349	79.84248005	599.8662983	5189.786004	0.8145	0.02449649	14622.67354	0.000455928	12340.90822	79.42286334	6378.152855	126.8657	120.6431	120.5195	3.719766593	3.90831452	4.123496059
0.785221961	0.738636364	684.5241131	4134.914634	0.7216	6.09E-05	16210.2094	4.78E-05	12721.27308	4.49E-05	11990.26039	0.816513854	80.48069307	735.7319307	5033.825248	0.808	0.024688057	15816.30347	0.000454353	13231.58763	80.0617829	6793.341089	0.768959026	0.891039427	659.1835125	3828.488459	0.6975	6.09E-05	16212.97319	4.68E-05	12464.84548	5.41E-05	14468.99756	0.812118235	81.25480889	729.0607045	4930.350237	0.8006	0.024915687	15812.8691	0.000457817	13162.56826	80.80180118	7356.619036	130.2544	126	126.9098	2.896390968	2.947134201	3.257923259
0.79189317	0.725808672	822.0967653	4233.532416	0.7265	6.73E-05	14655.36573	5.33E-05	11590.96952	4.84E-05	10722.7989	0.807601064	81.72855169	866.1724658	4844.865846	0.7961	0.025062382	14300.69275	0.000465016	11833.47049	81.25854161	6935.477578	0.773799791	0.908233276	800.5085763	3887.395083	0.6996	6.72E-05	14658.15252	5.21E-05	11328.43447	6.07E-05	13392.51701	0.804957294	81.91211282	868.3064719	4798.986653	0.7942	0.025122206	14293.46928	0.000465866	11784.07313	81.45293921	6781.411609	124.3846	119.7198	120.1107	2.554463317	2.663022336	2.946225638
0.800830811	0.648951995	656.6927654	4410.990534	0.7395	6.65E-05	14845.58769	5.33E-05	11879.05742	4.28E-05	9696.028938	0.818042665	80.36398467	687.7788901	5060.392906	0.8091	0.024660082	14479.55531	0.000458562	12126.08371	79.95293775	6144.782722	0.778436105	0.818616423	627.6667604	4002.987345	0.7112	6.65E-05	14838.7628	5.19E-05	11536.26058	5.40E-05	12238.87598	0.817413074	80.57160555	684.0089197	5040.893707	0.8072	0.024717971	14479.10344	0.000459473	12116.87157	80.14113346	6430.680872	125.7345	120.0585	120.9465	3.494339673	3.243466934	3.661671442
0.805929374	0.599465598	671.0350033	4525.519439	0.7485	7.38E-05	13365.49646	5.95E-05	10767.44357	4.42E-05	8015.976754	0.820876734	80.05318887	698.9411475	5118.388328	0.8122	0.024573315	13035.3445	0.000463146	10959.51438	79.64777666	5434.450751	0.779742582	0.771988796	634.5347339	4031.932773	0.714	7.38E-05	13354.8937	5.76E-05	10402.49676	5.67E-05	10356.28291	0.822008912	79.79980361	697.7477599	5149.202529	0.8147	0.024498124	13038.84743	0.000461974	10979.07318	79.40336777	5318.820547	119.3526	113.9313	113.6464	3.208157297	2.993222396	3.100414011
0.794613087	0.753931034	638.3015172	4253.694069	0.725	5.84E-05	16913.53862	4.65E-05	13408.25411	4.34E-05	12911.11048	0.815957326	80.48044554	696.350495	5026.411634	0.808	0.02468562	16514.80619	0.00045235	13788.18192	80.06178158	7160.147277	0.781458102	0.874964639	642.6033946	4007.415276	0.707	5.83E-05	16954.30679	4.56E-05	13243.53286	5.09E-05	14854.51216	0.813558231	81.24275724	687.6208791	4950.460539	0.8008	0.024907038	16513.09915	0.000455838	13750.45025	80.78162005	7874.327173	134.3925	128.2868	128.2145	3.53853695	3.493700869	3.464201171
0.795861052	0.706557377	820.3084699	4311.462568	0.732	5.13E-05	19244.40546	4.08E-05	15314.66979	3.61E-05	13628.25587	0.817103385	80.7103859	868.922571	5028.585308	0.8059	0.024742911	18774.779	0.000447626	15723.36318	80.27040347	8478.269636	0.770578215	0.880601288	774.7715104	3847.900501	0.6985	5.13E-05	19242.34918	3.96E-05	14823.37988	4.51E-05	16981.31224	0.816082539	80.8612803	869.8631448	5007.006215	0.8045	0.024785898	18766.91995	0.000448305	15693.71141	80.41009142	8712.559602	143.0157	136.6361	137.5132	2.620582666	2.705674923	2.621187853
0.770554098	0.80878187	891.5626062	3896.106516	0.706	6.04E-05	16336.93144	4.65E-05	12581.2709	4.86E-05	13259.10113	0.805699651	82.11887935	959.5489652	4798.201918	0.7924	0.025172421	15926.99419	0.000461294	13148.57526	81.63796428	7887.72842	0.768797238	0.939717335	877.3192962	3802.288434	0.6934	6.04E-05	16338.45573	4.64E-05	12553.64211	5.65E-05	15390.80358	0.799810579	82.79671797	944.9564941	4686.855235	0.7861	0.025373672	15924.83704	0.000464243	13053.30176	82.29223234	8267.781962	132.0738	125.8288	126.258	2.40365421	2.41890276	2.607457766
0.781556712	0.843291995	792.9385569	4023.145152	0.7096	5.59E-05	17658.28918	4.37E-05	13799.1912	4.71E-05	14891.63331	0.804331972	81.99823544	846.9884043	4786.613562	0.7934	0.025136403	17213.60234	0.000457068	14191.47363	81.53506492	8184.269347	0.772927061	0.86508842	782.0901312	3887.87935	0.7012	5.59E-05	17657.52268	4.32E-05	13643.49076	4.83E-05	15271.79421	0.801893032	81.99168137	850.7474162	4758.092261	0.7934	0.025136383	17219.85644	0.000456897	14159.13471	81.53506458	8061.086841	137.1968	130.9756	130.9408	2.438866491	2.487811215	2.957886976
0.778866261	0.817516193	787.0898338	4000.130104	0.7102	5.66E-05	17421.80555	4.41E-05	13560.83809	4.61E-05	14288.07871	0.81328361	80.93031359	848.2672972	4963.351419	0.8036	0.024818784	16992.94923	0.000452955	14157.04248	80.50014871	7519.352165	0.773875931	0.849630472	768.5542922	3911.411882	0.7036	5.66E-05	17425.00327	4.38E-05	13478.67803	4.80E-05	14842.72726	0.79969044	82.34539932	832.7040881	4710.451462	0.7901	0.02524188	16986.02012	0.000459132	13921.82391	81.87561187	8214.82306	136.2932	130.2928	129.6222	2.508153456	2.549562347	2.911952465
0.918146034	0.169047351	411.1612867	7179.277134	0.8891	8.25E-05	12089.96097	7.59E-05	11085.56063	1.36E-05	2081.110561	0.908919826	70.03944667	414.467416	7348.116611	0.9253	0.021587192	11837.31601	0.000428379	10981.15143	69.91236301	1559.631903	0.896838226	0.219003476	398.0495944	6592.847045	0.863	8.24E-05	12096.86292	7.41E-05	10837.61816	1.78E-05	2674.75226	0.908562724	70.05372392	413.5253486	7339.36796	0.9251	0.021591819	11841.43466	0.000428388	10984.0915	69.92747751	1545.371203	115.8701	108.3335	99.9231	6.371359823	6.698841523	7.205038958
0.907644095	0.199771429	387.6827429	6876.316114	0.875	9.70E-05	10314.7776	8.82E-05	9350.841374	1.91E-05	2082.532343	0.894032931	71.81616833	387.8117386	6900.554596	0.903	0.022132544	10080.8773	0.00044899	9198.467699	71.63888715	1867.745072	0.872596188	0.333172147	363.5389265	5939.312863	0.8272	9.72E-05	10299.93544	8.51E-05	8967.986191	3.16E-05	3488.209139	0.904597442	70.49081022	394.656335	7219.963567	0.9195	0.021737058	10092.62795	0.000443428	9317.750496	70.35335728	1435.275911	107.7658	99.9576	90.2036	6.371761951	7.076341021	7.702450716
0.908231524	0.187015945	414.7615034	6907.101139	0.878	8.28E-05	12025.56093	7.53E-05	10911.21748	1.52E-05	2272.650228	0.904670606	70.53988464	419.9940146	7217.902166	0.9189	0.021737255	11774.0777	0.000430708	10879.28995	70.39929325	1701.337251	0.904578856	0.204772284	411.8548813	6795.377194	0.8717	8.27E-05	12036.14156	7.49E-05	10884.70736	1.68E-05	2470.88402	0.914081607	69.5882732	426.6361684	7498.350515	0.9312	0.02145123	11776.26385	0.000426799	10989.57596	69.46940405	1437.863939	116.7495	107.7519	97.5513	5.96358531	6.266876925	6.609657201
0.89244036	0.235239207	428.7633606	6473.324854	0.857	7.78E-05	12789.68588	6.95E-05	11405.11831	1.80E-05	3036.098133	0.889738453	71.95905005	435.8982355	6803.072356	0.9011	0.022160203	12499.33781	0.000432191	11352.37832	71.78993632	2196.540229	0.877882064	0.282663167	418.6246271	6097.502088	0.8381	7.78E-05	12783.20797	6.84E-05	11207.89002	2.17E-05	3651.084	0.894449201	71.37322471	441.4223274	6940.985908	0.9083	0.021985144	12503.0185	0.00042966	11414.90375	71.22086375	1979.329076	119.331	111.3844	102.3828	5.62988801	6.130614703	6.717965775
0.884304883	0.261491197	432.5403521	6260.004845	0.8463	8.55E-05	11617.92958	7.57E-05	10261.94272	2.19E-05	3081.556658	0.889382615	72.19915396	446.257709	6778.208282	0.8983	0.022236516	11364.0108	0.000440066	10322.82838	72.01370806	2190.161973	0.866872761	0.317818182	422.7978182	5833.952485	0.825	8.55E-05	11619.63782	7.42E-05	10060.79262	2.68E-05	3730.435152	0.894705443	71.46781305	450.2186949	6939.09634	0.9072	0.022019198	11367.73887	0.000436951	10385.24207	71.30722247	1892.099978	114.1504	106.0394	96.976	5.489624745	5.719654504	6.224309118
0.906651161	0.19086758	408.9648402	6863.281735	0.876	8.46E-05	11810.68059	7.69E-05	10696.87344	1.58E-05	2286.130479	0.904894038	70.45195652	416.105	7229.035652	0.92	0.021713139	11563.24533	0.000431959	10684.73323	70.31512009	1631.401522	0.900871366	0.205665592	407.2510364	6703.44795	0.8684	8.46E-05	11814.92849	7.63E-05	10635.88398	1.71E-05	2456.628743	0.91395439	69.5640365	422.8743961	7497.195813	0.9315	0.021446114	11569.16414	0.000428331	10796.53659	69.44703066	1393.59796	115.76	106.7777	96.5359	6.277611011	6.744396393	7.239524238
0.889527573	0.237560005	392.9622995	6402.506381	0.8541	7.99E-05	12480.87859	7.12E-05	11095.65955	1.88E-05	2982.815947	0.893783653	71.60408614	404.0144671	6910.655881	0.9055	0.02205495	12207.94158	0.000432563	11146.06654	71.44109516	2045.814025	0.875157531	0.29806885	383.5855823	6023.653952	0.8337	7.99E-05	12477.43493	7.01E-05	10911.26494	2.35E-05	3745.197793	0.895567288	71.40484581	404.9026432	6961.262115	0.908	0.021994466	12205.91883	0.000431741	11164.05495	71.2443959	2018.348899	116.3215	110.5399	103.3777	6.382157766	6.7706431	8.157612562
0.933554603	0.128036048	332.7883284	7646.034619	0.9099	7.20E-05	13996.86724	6.73E-05	13055.86305	9.01E-06	1811.847126	0.92104744	68.86139456	334.2755102	7715.647534	0.9408	0.021222618	13710.09471	0.00041386	12892.08865	68.76053008	1419.438457	0.929161914	0.129263716	330.6120985	7522.820952	0.9059	7.20E-05	13988.3486	6.71E-05	12982.28632	8.99E-06	1848.137322	0.932160247	67.75936388	339.7474367	8070.66583	0.9558	0.0208907	13710.99236	0.000409228	13041.6855	67.68142417	1102.063089	123.9284	116.6181	108.3821	8.628885991	8.902182451	9.042095973
0.89455674	0.236452628	250.5324554	6519.172241	0.8581	7.69E-05	13189.12609	6.90E-05	11770.27078	1.75E-05	3214.98217	0.8940774	71.53867373	257.5823679	6921.29637	0.9063	0.022032598	12897.23955	0.00042969	11757.42296	71.37803231	2205.835485	0.883451232	0.289533088	244.4271118	6215.039206	0.8417	7.70E-05	13178.75181	6.83E-05	11604.85483	2.15E-05	3915.111916	0.900202651	71.12198333	259.339842	7079.286529	0.9116	0.021904896	12909.53905	0.000427996	11852.37503	70.96304384	2152.981681	120.0839	113.1881	106.7405	8.573999113	10.23263008	11.99711464
0.890617295	0.246397188	446.0474517	6417.961219	0.8535	9.07E-05	10950.45155	8.09E-05	9746.514094	2.21E-05	2720.555009	0.894593894	71.54910616	459.5758111	6931.234606	0.9062	0.022048526	10713.95145	0.000441998	9791.355826	71.38591183	1795.125028	0.875485039	0.287372831	436.9468582	6040.893477	0.8355	9.07E-05	10960.48929	7.94E-05	9594.409274	2.60E-05	3142.552124	0.898136741	71.22146545	462.0660222	7028.474898	0.9103	0.021949657	10711.23135	0.000440735	9824.593525	71.06438844	1735.416236	110.9159	102.9029	93.8199	5.547488368	5.788788439	6.082849989
0.87899395	0.286020992	481.7674141	6118.045324	0.8384	8.15E-05	12151.63299	7.17E-05	10669.76878	2.30E-05	3511.548306	0.872594455	73.93015837	485.1631537	6335.808477	0.8777	0.022752464	11889.13911	0.000443586	10609.77805	73.70390345	2763.892674	0.861804811	0.376645749	465.9004553	5675.241664	0.8127	8.15E-05	12157.16587	7.03E-05	10471.46856	3.04E-05	4614.062877	0.884272756	72.51828246	497.2692609	6655.094375	0.8943	0.022331671	11889.46125	0.000437667	10743.97697	72.33580806	2238.172202	116.3454	108.7148	99.355	4.495163939	5.290903605	5.509117443
0.910218249	0.185766257	372.3055935	6956.991814	0.8796	8.76E-05	11408.9161	7.98E-05	10375.88837	1.61E-05	2129.587995	0.90214758	70.73417722	376.1938018	7149.196421	0.9164	0.021801175	11153.93627	0.000436019	10268.75745	70.59134791	1653.568966	0.891268625	0.243856775	360.8371168	6436.708168	0.8546	8.77E-05	11397.72467	7.84E-05	10142.27446	2.09E-05	2820.120641	0.909541899	70.0817474	379.3112024	7358.899005	0.9248	0.021603886	11164.855	0.00043332	10367.18026	69.95016274	1512.584883	112.6542	105.1632	96.2646	6.740283552	7.095404552	7.418381686
0.937700036	0.111402073	296.4503001	7783.571086	0.9165	7.39E-05	13678.97381	6.94E-05	12818.88938	7.99E-06	1550.075068	0.928310181	68.21335299	299.0486521	7940.222831	0.9496	0.021028457	13403.14501	0.000412887	12702.84915	68.12332161	1239.175021	0.925718598	0.144571619	291.2364707	7409.319369	0.8999	7.39E-05	13668.97666	6.86E-05	12637.15914	1.04E-05	2014.666074	0.931693852	67.74945078	300.5671095	8060.111204	0.9559	0.020890365	13402.25934	0.000410894	12744.02575	67.67434375	1035.568156	121.9461	115.4927	107.2253	9.250642939	9.58097838	9.519681713
0.885278007	0.250618593	517.2304701	6292.623424	0.8487	8.38E-05	11826.4699	7.43E-05	10453.58786	2.07E-05	3004.215035	0.889644802	71.9579403	531.4423482	6801.379092	0.9011	0.022165997	11571.9565	0.00043743	10511.81659	71.78993729	2010.552325	0.869975211	0.311677334	504.9188504	5903.069074	0.8281	8.37E-05	11833.85956	7.29E-05	10284.9659	2.58E-05	3719.047217	0.892758723	71.6856827	533.5735766	6883.535544	0.9045	0.022082947	11579.41769	0.000436239	10561.77327	71.52007999	1983.443671	114.0081	107.6117	99.2673	4.769762509	5.162182011	5.381677314
0.927848447	0.146566071	374.2945745	7464.596583	0.9013	8.07E-05	12410.97104	7.50E-05	11504.55217	1.15E-05	1848.11206	0.910905601	69.85393985	371.3080737	7406.697316	0.9277	0.021529816	12148.53369	0.000426004	11295.47282	69.73149614	1539.001294	0.902070116	0.198484675	360.8918609	6743.31753	0.8711	8.07E-05	12414.25221	7.29E-05	11188.72851	1.58E-05	2487.067271	0.917211313	69.2449503	374.8820135	7596.447686	0.9357	0.021346407	12154.32329	0.000423457	11380.45025	69.13530843	1377.662606	117.0314	109.8546	100.9886	7.310705441	7.548460693	7.924169991
0.912324958	0.188784198	364.3122942	7007.120104	0.8809	8.40E-05	11895.11999	7.67E-05	10847.03283	1.56E-05	2273.902486	0.907097176	70.20918644	369.3477413	7295.335825	0.9231	0.021639973	11637.59874	0.000430458	10778.10208	70.07898377	1568.350666	0.892231898	0.241613092	351.5624781	6460.046172	0.8555	8.40E-05	11894.67726	7.50E-05	10604.78939	2.01E-05	2893.224664	0.910693577	69.85437103	371.2658187	7401.460278	0.9277	0.021533111	11635.49326	0.000429054	10813.5891	69.73149661	1480.253099	114.2535	107.6041	100.0027	6.511300773	7.267197754	8.085486548
0.889526648	0.24516356	370.7605815	6394.627623	0.8529	7.98E-05	12513.91781	7.11E-05	11120.14658	1.93E-05	3098.647321	0.890301037	71.96126956	379.0494951	6814.209855	0.9011	0.022162138	12243.40961	0.000433969	11133.09833	71.78993695	2154.42326	0.878925868	0.297562141	362.8857553	6106.368308	0.8368	7.98E-05	12519.83162	7.02E-05	10996.28224	2.35E-05	3740.336401	0.895416041	71.36966094	383.1358432	6960.910172	0.9084	0.021984694	12242.99317	0.000431473	11194.10187	71.2130242	1978.003082	116.5365	110.6096	103.8202	6.699945354	7.09533564	8.430923553
0.895835349	0.227731971	400.7136221	6561.683312	0.8611	7.50E-05	13271.70085	6.73E-05	11880.39989	1.68E-05	3059.171873	0.889361574	71.92379368	404.7896839	6798.071326	0.9015	0.022147668	12980.29695	0.000429473	11791.11602	71.75808212	2220.647144	0.884923217	0.278343195	390.7616568	6261.733018	0.845	7.50E-05	13271.4284	6.65E-05	11735.0386	2.06E-05	3730.828757	0.899121797	71.0673098	411.5283929	7060.585398	0.9122	0.021888701	12992.54955	0.00042585	11936.25153	70.91636726	2015.570708	121.453	113.4728	104.8569	6.062803889	6.494186643	6.956193096
0.893559222	0.239972015	335.238806	6497.00583	0.8576	0.000101127	9926.927705	9.04E-05	8866.606867	2.41E-05	2390.937733	0.891252909	71.83824507	343.2169289	6842.207401	0.9026	0.022146329	9706.397518	0.000452482	8836.330087	71.67063502	1668.441835	0.871663758	0.331800581	323.1868345	5919.138916	0.8264	0.000101254	9916.082648	8.84E-05	8632.718747	3.31E-05	3323.503267	0.900090803	71.00547645	346.2615553	7085.505367	0.913	0.021895109	9718.828806	0.000449055	8942.59205	70.85423208	1499.023111	106.4501	97.7024	87.3655	7.21787434	7.59367067	8.455052321
0.897194	0.219879518	354.1846617	6600.658943	0.8632	9.49E-05	10540.19127	8.52E-05	9451.99547	2.07E-05	2320.450996	0.89788785	71.13056836	360.6872943	7029.680711	0.9114	0.021927315	10314.63068	0.000443938	9463.409236	70.97861873	1597.34255	0.883490439	0.278824505	345.8012798	6229.809575	0.8439	9.50E-05	10524.8661	8.41E-05	9284.537981	2.60E-05	2977.465695	0.898318048	71.13980029	359.5605179	7038.161418	0.9113	0.021929744	10312.70153	0.000444064	9466.028094	70.98640749	1621.927686	108.9247	100.918	91.5425	6.278935412	7.296209701	8.130756038
0.911558612	0.183437323	421.1894498	6995.408395	0.8815	2.82E-05	35213.38151	2.57E-05	32094.74089	5.16E-06	6467.197958	0.898302367	71.17257657	422.1263585	7035.412559	0.9109	0.021874131	34461.87573	0.000384311	31644.85966	71.01756942	5443.355143	0.895761737	0.239636702	409.5761528	6545.585468	0.8588	2.82E-05	35232.5857	2.53E-05	31570.68754	6.76E-06	8425.760829	0.911594659	69.95984456	430.1221934	7414.806347	0.9264	0.021508625	34464.31811	0.000378694	32095.20574	69.82934306	4593.295229	187.1711	187.1857	190.2128	6.255431623	6.419050982	6.659873584
0.9102598	0.178153741	404.4095606	6965.408312	0.8807	2.89E-05	34494.78949	2.63E-05	31384.13592	5.09E-06	6190.809697	0.909515436	70.08131488	414.145545	7358.536332	0.9248	0.021546403	33752.10759	0.000379834	31343.4505	69.95015513	4556.821691	0.901174546	0.21350386	398.3766563	6705.24519	0.8679	2.89E-05	34482.25084	2.60E-05	31052.81462	6.08E-06	7442.831547	0.912189762	69.76326838	416.3852944	7442.449456	0.9289	0.021451428	33754.18613	0.000378349	31435.11954	69.64140728	4242.441705	184.8637	185.4212	188.6168	6.488768936	7.154801923	7.436286557
0.898981889	0.22957469	466.3218218	6632.061305	0.8629	2.85E-05	34916.5186	2.56E-05	31375.67494	6.49E-06	8047.852474	0.892558061	71.72632743	473.6006637	6876.563938	0.904	0.022041103	34148.45697	0.000387115	31138.55221	71.55962861	5840.592367	0.89580755	0.228392193	462.6930762	6559.338522	0.8608	2.85E-05	34908.21596	2.55E-05	31250.90545	6.45E-06	8015.090497	0.908365859	70.23775466	483.0739055	7321.48938	0.9228	0.021592642	34165.1399	0.00038019	31696.0106	70.10175936	4780.652254	185.3832	186.7888	190.0886	5.670675247	5.895387567	6.192830535
0.894584404	0.248949089	445.2003737	6508.334423	0.8564	3.09E-05	32200.51833	2.77E-05	28763.76668	7.54E-06	8154.797875	0.885147298	72.58057296	448.5282005	6668.057073	0.8936	0.022299684	31477.00929	0.000393315	28436.28153	72.39246316	6177.057856	0.872303055	0.348415195	424.3324462	5929.986934	0.8266	3.09E-05	32181.35543	2.70E-05	28018.64312	1.05E-05	11432.7866	0.886631131	72.43377262	446.8818405	6707.233415	0.8954	0.022254905	31491.53261	0.000392604	28505.91038	72.2469344	6121.852468	179.8548	179.1578	180.8176	6.228556571	6.638712161	6.897400252
0.891621613	0.260206476	469.3542938	6428.565931	0.8524	3.03E-05	32837.92187	2.70E-05	29246.14985	7.78E-06	8620.801736	0.885012325	72.57614412	476.7426429	6665.044758	0.8937	0.022296547	32120.21942	0.000392658	29040.00198	72.38436291	6350.868188	0.87200952	0.324882289	453.4454908	5936.879271	0.8283	3.03E-05	32842.67077	2.64E-05	28611.30026	9.73E-06	10748.04781	0.888991653	72.21345062	479.1886204	6769.588799	0.8981	0.022187456	32126.50941	0.000390979	29177.03911	72.02973493	6087.374123	180.974	180.8844	183.4832	5.475118629	5.896273114	6.318790846
0.916174591	0.183318264	207.1026221	7111.056962	0.8848	3.49E-05	29300.0434	3.20E-05	26814.88818	6.28E-06	5458.584087	0.907230741	70.35569304	209.7532834	7287.420493	0.9213	0.021634117	28623.50505	0.000386702	26475.63675	70.21589525	4250.288288	0.905277395	0.21677197	202.8403217	6800.57243	0.8705	3.49E-05	29275.8641	3.17E-05	26452.83534	7.43E-06	6452.115451	0.9142815	69.63006339	212.1464489	7499.422048	0.9307	0.021415933	28651.88718	0.000383309	26715.87551	69.50671954	3715.959171	172.345	170.0662	169.4078	13.39630453	15.52397557	18.37014151
0.898624857	0.239939696	327.9746028	6620.133712	0.8623	3.08E-05	32379.4793	2.77E-05	29067.39139	7.28E-06	7854.214079	0.892646851	71.76250553	332.8977424	6875.540062	0.9036	0.022053097	31673.91324	0.000389344	28872.22992	71.59130666	5602.856574	0.878206518	0.307065868	316.1005988	6082.567904	0.835	3.08E-05	32366.89054	2.71E-05	28387.53077	9.31E-06	10066.14108	0.896457194	71.41524397	333.9560524	6979.235709	0.9079	0.021948789	31683.6732	0.000387739	29005.16906	71.25223538	5321.250248	179.7202	179.5878	182.053	6.960266659	7.591949102	8.095677303
0.880863305	0.292659676	530.0078646	6154.635367	0.8392	3.15E-05	31485.53039	2.78E-05	27712.06592	9.16E-06	9259.984152	0.881145596	73.04391397	542.6063506	6557.632586	0.8881	0.022438193	30779.25301	0.000395969	27710.10239	72.84079003	6445.527531	0.875064789	0.314883889	523.819396	6005.288774	0.8311	3.15E-05	31497.48406	2.76E-05	27552.82634	9.85E-06	9969.309349	0.883169762	72.7744867	543.9796926	6615.393807	0.8913	0.022357735	30795.02839	0.000394691	27794.58056	72.57927235	6172.982834	177.8736	177.0222	178.995	4.867219231	5.057559407	5.14412043
0.888890735	0.26053189	429.2381737	6363.301012	0.8498	2.93E-05	33912.9807	2.61E-05	30131.91013	7.58E-06	8881.656272	0.889972677	72.03732504	440.5900911	6801.990669	0.9002	0.022134855	33164.75117	0.000389324	30157.12519	71.86170251	5990.641524	0.886754336	0.269294312	427.4326174	6309.432617	0.8474	2.93E-05	33897.45197	2.60E-05	30037.29905	7.80E-06	9215.120014	0.899786978	71.0708178	447.8653804	7074.156545	0.9122	0.021844063	33167.5159	0.000384844	30478.35042	70.91636054	5278.5467	183.7857	183.7419	186.7377	5.933715152	6.099957737	6.264479125
0.934916033	0.124068391	347.0740903	7691.70605	0.9124	3.10E-05	32187.37231	2.90E-05	30086.13037	3.79E-06	4034.131083	0.924340165	68.5117927	349.4270756	7820.660074	0.9455	0.021077465	31499.82771	0.000374557	29713.53612	68.41872309	3030.205394	0.929241231	0.129359823	345.1249448	7525.24128	0.906	3.11E-05	32164.77296	2.89E-05	29863.46155	3.94E-06	4223.828918	0.930004597	68.05232192	352.6371086	7994.63921	0.9518	0.020938157	31503.62408	0.000372443	29893.82697	67.96585681	2813.629439	179.8553	178.7295	180.3253	8.533976911	8.805778202	9.050783387
0.890402677	0.256250734	449.0218335	6403.58575	0.8519	3.01E-05	32993.21822	2.68E-05	29364.91044	7.65E-06	8508.817232	0.890256942	72.12633452	462.8064947	6800.881673	0.8992	0.022160221	32265.85609	0.000390446	29352.14281	71.94162028	6136.309386	0.883828402	0.285104364	445.1456357	6231.09203	0.8432	3.01E-05	32990.61006	2.66E-05	29144.59348	8.51E-06	9470.825664	0.898433491	71.23953412	466.5734535	7033.424129	0.9101	0.02189517	32280.87507	0.000386332	29628.03813	71.07999599	5274.152291	180.8924	181.3559	184.3346	5.504454763	5.957754207	5.896782414
0.882680099	0.269818699	575.0694395	6216.343524	0.8439	3.13E-05	31684.73942	2.77E-05	27947.15035	8.40E-06	8583.653632	0.881192494	73.025667	583.098165	6559.836204	0.8883	0.022432954	30974.76168	0.000395711	27889.16965	72.8243899	6418.914443	0.867678997	0.369140625	555.142334	5808.480469	0.8192	3.13E-05	31689.36987	2.72E-05	27480.8199	1.15E-05	11740.12585	0.886478914	72.39033374	589.6480634	6707.294453	0.8959	0.022242908	30990.33843	0.000392737	28072.83841	72.20661359	5849.186851	178.3545	177.6161	179.5437	4.697981455	5.063883963	5.099322534
0.914682459	0.186409966	218.608154	7068.964666	0.883	3.45E-05	29608.3675	3.16E-05	27051.12256	6.30E-06	5611.535787	0.906631074	70.41814231	222.0270505	7269.65182	0.9205	0.021652433	28939.60478	0.000386554	26759.52793	70.2769194	4316.604237	0.90487576	0.215303309	214.0818015	6792.212546	0.8704	3.45E-05	29580.20416	3.13E-05	26711.83564	7.27E-06	6485.333065	0.913613726	69.69907507	223.8145838	7478.961927	0.9298	0.02143619	28956.64842	0.000383217	26981.21447	69.57399858	3802.157131	173.1846	171.0378	170.6056	12.95373779	15.02849198	17.73905433
0.892134953	0.253864169	415.6737705	6447.894145	0.854	3.36E-05	29743.28653	3.00E-05	26503.89725	8.37E-06	7664.829391	0.88598838	72.32946687	425.1775597	6701.921258	0.8966	0.022227794	29072.73188	0.000394489	26291.53704	72.1502401	5440.259201	0.873012495	0.33688029	404.0616687	5944.758888	0.827	3.36E-05	29740.62769	2.94E-05	25926.50527	1.12E-05	10134.16965	0.88885245	72.25534759	422.2352941	6763.887255	0.8976	0.022203047	29093.18271	0.000394144	26408.8611	72.06985906	5597.051693	174.3564	171.938	170.9792	7.502664796	8.192200925	9.822380942
0.88304781	0.279307072	428.3932131	6215.375178	0.8428	3.12E-05	31878.25071	2.76E-05	28117.23425	8.59E-06	9009.557309	0.884126944	72.69158355	436.6534798	6639.901266	0.8923	0.022332392	31174.24588	0.000394036	28151.17908	72.49793265	6254.438642	0.873096034	0.315808513	419.9591222	5961.434583	0.8293	3.12E-05	31876.27372	2.73E-05	27799.26651	9.71E-06	10187.03364	0.889337404	72.26573816	439.2711978	6772.830641	0.8975	0.022203176	31183.35565	0.000392066	28325.81919	72.07788878	6058.106407	179.139	178.007	180.0814	5.721230549	6.267563402	6.627139205
0.896637948	0.254344023	409.9121866	6552.96828	0.8575	2.88E-05	34501.68478	2.59E-05	30909.99353	7.28E-06	8813.057726	0.888364097	72.21670379	416.8592428	6757.283742	0.898	0.022188535	33739.45724	0.000389739	30620.17088	72.03775566	6222.162249	0.886753676	0.28706774	405.6316911	6290.337044	0.8444	2.88E-05	34483.99597	2.56E-05	30548.79122	8.17E-06	10006.41509	0.895623837	71.48577729	423.3329658	6957.135391	0.907	0.021968645	33750.98302	0.00038633	30876.48355	71.3229374	5655.751599	185.2709	185.3403	188.5293	6.131746341	6.397475745	6.771642453
0.917491139	0.168521641	420.2438449	7167.342215	0.8895	2.81E-05	35440.32693	2.57E-05	32518.94635	4.71E-06	5979.615852	0.900204068	70.85811106	419.7418015	7098.598164	0.9148	0.02178084	34661.77438	0.0003827	31879.19577	70.71480505	5088.113358	0.908341455	0.199177707	413.9869804	6894.072407	0.8756	2.81E-05	35435.41754	2.55E-05	32182.9457	5.58E-06	7056.444153	0.915728547	69.34871026	428.0249385	7554.605908	0.9343	0.021326833	34676.37247	0.000375679	32425.15467	69.2388985	3895.98919	187.3077	187.8811	191.3007	6.260225292	6.44541409	6.963668538
0.887662936	0.252646436	268.1289108	6344.029875	0.8502	5.81E-05	17355.79805	5.15E-05	15432.24778	1.48E-05	4309.003529	0.889674421	72.2170137	275.0126935	6782.848569	0.8981	0.022214749	16952.57366	0.000415783	15430.38394	72.02974039	3206.796459	0.876773359	0.293301435	265.6191388	6065.175598	0.836	5.82E-05	17333.40658	5.10E-05	15210.15411	1.71E-05	5051.578708	0.896711441	71.30818302	280.7300924	6992.227893	0.9092	0.021944257	16953.40948	0.000411759	15546.06247	71.15036121	2699.175759	136.542	129.6328	123.1273	9.788975227	10.26009572	11.03659797
0.908936619	0.185606923	455.0061489	6923.124573	0.8782	2.95E-05	33641.11102	2.69E-05	30568.08511	5.45E-06	6267.482806	0.900123084	70.93062698	458.6533538	7091.916074	0.9139	0.021803715	32908.39348	0.000384393	30259.08522	70.7844446	4941.854142	0.899386987	0.230751418	444.5218247	6644.079078	0.8637	2.96E-05	33637.59743	2.66E-05	30239.58535	6.77E-06	7790.603219	0.911794349	69.81814264	465.579401	7429.139841	0.9282	0.021468259	32918.99817	0.000379227	30650.0358	69.69392736	4199.505495	183.0222	183.3175	185.3911	5.940194202	6.4023975	6.260985609
0.893793775	0.264020606	398.0792647	6478.219295	0.8541	3.12E-05	31950.79651	2.79E-05	28517.06604	8.07E-06	8570.195293	0.89126264	71.96659638	408.1017645	6833.032183	0.9011	0.022114571	31258.61136	0.00039066	28441.78092	71.78992884	5720.353568	0.88196935	0.281947743	392.2505938	6191.489311	0.842	3.12E-05	31949.02233	2.75E-05	28133.29372	8.63E-06	9138.677553	0.896841691	71.51770156	410.2548803	6980.088122	0.9067	0.021978161	31280.82817	0.000388565	28649.12721	71.34653665	5512.215286	179.1333	178.4195	180.0449	6.671336531	7.026401622	7.04977191
0.95041698	0.092391888	171.9533212	8183.204528	0.9319	4.56E-05	23396.36163	4.35E-05	22190.60277	3.89E-06	2251.058161	0.946340554	66.48408297	178.1047443	8541.034709	0.9738	0.020479991	22963.64777	0.00037893	22164.50163	66.43037814	1280.415794	0.955011224	0.082942431	174.6162047	8336.362047	0.938	4.55E-05	23436.08326	4.36E-05	22367.06316	3.56E-06	1986.452878	0.945958848	66.54100719	177.5227133	8525.835971	0.973	0.020496744	22958.14255	0.000379099	22148.43633	66.48499729	1345.680164	150.1796	152.8216	153.1619	19.38170642	18.30168772	18.4765551
0.956371351	0.075680272	198.2676446	8388.477891	0.9408	4.47E-05	23065.72864	4.28E-05	22046.81554	3.28E-06	1764.121705	0.950095217	66.10988562	203.245098	8672.891544	0.9792	0.020366468	22598.67586	0.000376395	21898.68553	66.06403383	1077.360907	0.952490673	0.085543199	197.1124893	8255.524594	0.9352	4.47E-05	23069.99679	4.26E-05	21963.75941	3.74E-06	1982.467066	0.945948297	66.54836057	201.7723301	8524.836777	0.9729	0.020498089	22583.09857	0.000378416	21782.79967	66.49183096	1342.558331	151.4579	151.2075	150.8643	14.40568733	15.13311745	15.08821678
0.948041701	0.089326024	251.4007309	8115.603246	0.9303	4.20E-05	24263.93615	3.98E-05	23006.03532	3.71E-06	2163.330646	0.949175288	66.19991819	258.3148584	8640.121383	0.9779	0.020390892	23767.33582	0.000374271	23020.6428	66.15185799	1165.120155	0.958715947	0.072472982	255.6734478	8466.937487	0.9438	4.20E-05	24269.32242	4.03E-05	23273.79772	3.01E-06	1747.196228	0.942900578	66.79141737	255.6436971	8424.23953	0.9694	0.020569325	23760.38612	0.000376953	22863.98095	66.73189846	1446.717764	149.9651	157.6794	157.0196	13.53423371	13.20087178	13.24632084
0.955829228	0.075287112	172.4204594	8372.244577	0.9404	4.53E-05	23122.67429	4.34E-05	22075.85245	3.26E-06	1768.991706	0.952614281	65.87685732	177.8921229	8761.343985	0.9826	0.020296719	22680.97374	0.000375896	22043.153	65.83543841	964.3815388	0.960771448	0.06911858	173.5941661	8535.59628	0.9462	4.53E-05	23152.55823	4.35E-05	22241.33956	3.05E-06	1594.011097	0.948756381	66.23409044	177.3400859	8626.07919	0.9774	0.020404481	22671.24678	0.000377524	21941.56364	66.18569885	1134.309085	152.3782	150.6714	151.0757	17.21492854	17.29827223	17.20602713
0.940726147	0.10826087	264.4015217	7875.306957	0.92	4.63E-05	21971.73935	4.35E-05	20676.59979	4.95E-06	2361.399022	0.941153921	66.99813761	270.923642	8361.33523	0.9665	0.020635042	21522.55034	0.000381833	20685.35001	66.93212925	1435.403001	0.946895465	0.095217579	266.0004308	8074.548901	0.9284	4.63E-05	21971.7724	4.38E-05	20812.87656	4.35E-06	2076.410168	0.937167768	67.32938241	269.9247245	8232.009357	0.9618	0.020735644	21520.00603	0.000383288	20596.84995	67.25920473	1525.700665	141.0755	150.6998	150.3539	11.91105368	12.15982237	12.05885794
0.930623627	0.13771397	327.6210933	7552.46085	0.9055	3.80E-05	26501.57935	3.54E-05	24648.87003	5.13E-06	3683.786858	0.933151551	67.71050706	336.6899111	8099.418819	0.9565	0.020842241	25969.57857	0.000377343	24739.26887	67.63189003	2088.096602	0.93560498	0.119456914	328.1236177	7714.438082	0.9133	3.80E-05	26514.80904	3.56E-05	24803.84589	4.45E-06	3184.589949	0.928693665	68.15467172	334.964436	7953.90383	0.9504	0.020975784	25956.41267	0.000379392	24604.65811	68.06597552	2367.318497	160.2633	163.5225	163.3883	10.41143473	10.28578114	10.21013825
0.950431907	0.086155165	233.7565366	8192.039434	0.9332	3.84E-05	26453.98468	3.65E-05	25128.91944	3.23E-06	2303.747321	0.946018315	66.51957259	237.6183088	8529.049933	0.9733	0.02048349	25909.18011	0.000372287	24996.65021	66.46450425	1483.973184	0.9521027	0.080029918	234.0178438	8250.917726	0.9359	3.83E-05	26477.35303	3.65E-05	25211.53373	3.03E-06	2110.852869	0.942618858	66.79758589	237.6598576	8416.341793	0.9693	0.020567827	25928.10265	0.000373485	24942.52829	66.73878278	1557.263592	160.4969	162.9383	163.0527	12.80921506	12.66999184	12.59818728
0.958633584	0.074329339	192.3614675	8460.970311	0.9431	4.38E-05	23692.98176	4.20E-05	22708.11813	3.14E-06	1771.410349	0.957971063	65.41681827	199.9721043	8950.052759	0.9894	0.020156049	23227.06489	0.000372383	22703.39768	65.38296082	800.5334546	0.968997635	0.049040067	196.8422371	8830.363731	0.9584	4.38E-05	23700.83984	4.24E-05	22966.72763	2.09E-06	1160.44063	0.953950428	65.79630006	197.7965034	8805.644033	0.9838	0.020270582	23205.12899	0.000374173	22574.7038	65.75513487	994.0212442	149.1629	154.9736	154.6063	15.74499805	16.04332581	16.08359103
0.925541639	0.142190624	328.0408798	7407.628305	0.9002	4.02E-05	24958.37547	3.72E-05	23095.09956	5.66E-06	3549.987669	0.93343107	67.68812709	340.0096154	8108.799958	0.9568	0.02083779	24450.5695	0.000379203	23303.94262	67.61068453	1924.344482	0.933912791	0.136883803	330.1846391	7646.101012	0.9088	4.02E-05	24963.12159	3.75E-05	23314.74584	5.43E-06	3423.277949	0.924994992	68.50740271	335.3620981	7836.399535	0.9456	0.021084136	24440.4982	0.00038293	23087.57975	68.41148859	2393.130499	149.9451	161.4665	160.0904	9.431112659	9.302509218	9.376802645
0.946332368	0.101252159	223.8162781	8049.025691	0.9264	4.44E-05	23183.50604	4.21E-05	21924.97747	4.34E-06	2368.962867	0.946935945	66.36401845	233.1338801	8566.177242	0.9755	0.020443224	22714.26858	0.00037722	21939.07554	66.31460999	1163.926602	0.955364423	0.074337977	229.6521323	8359.51239	0.9403	4.43E-05	23210.91811	4.23E-05	22178.37527	3.28E-06	1700.140487	0.943314137	66.73469388	231.4248609	8439.611008	0.9702	0.020554643	22721.27706	0.000378862	21871.77754	66.67687323	1350.561946	146.4826	154.0874	153.556	13.84023472	14.56563631	14.29562395
0.939084232	0.111667938	292.86687	7823.617279	0.9179	3.94E-05	25719.15525	3.71E-05	24155.1523	4.35E-06	2867.283364	0.940448989	67.00186258	299.4103891	8343.100993	0.9664	0.020630527	25185.10793	0.000375479	24173.69436	66.93905458	1615.563638	0.941441485	0.103732639	291.906467	7902.297743	0.9216	3.95E-05	25710.79818	3.72E-05	24203.14706	3.99E-06	2679.746962	0.934176546	67.64062663	297.663812	8130.230914	0.9575	0.020821924	25182.04836	0.000378379	24015.24287	67.56125633	2039.870809	157.2852	161.0592	160.995	12.03987795	11.7137396	11.75241145
0.91036577	0.185673678	455.3124503	6959.619215	0.8795	3.95E-05	25254.09414	3.60E-05	22991.16177	7.30E-06	4682.36498	0.913041363	69.63120567	469.2516656	7471.669031	0.9306	0.02142275	24705.17956	0.000387489	23036.65679	69.51418897	2967.291747	0.912963988	0.197636095	453.1093306	7013.607796	0.8799	3.96E-05	25235.82021	3.62E-05	23028.31951	7.71E-06	5017.52381	0.910744537	70.00712897	466.2106286	7391.143876	0.9258	0.021533605	24711.16429	0.0003892	22994.11654	69.87460013	3350.934651	151.5704	162.2094	161.0272	7.838280669	7.619852468	7.628581792
0.961137334	0.067793031	166	8549.563464	0.947	4.73E-05	22284.32503	4.56E-05	21394.55345	3.03E-06	1554.090813	0.955050548	65.67349838	170.4308036	8845.986404	0.9856	0.020237044	21861.02374	0.000376909	21297.30595	65.6350464	866.7556818	0.959773611	0.068965517	165.1766448	8504.583034	0.9454	4.73E-05	22313.68564	4.54E-05	21413.64168	3.16E-06	1544.829913	0.949658897	66.1661897	168.813982	8655.905151	0.9784	0.020385649	21852.6344	0.000379144	21169.21883	66.11805204	1092.790781	149.1991	147.8947	148.5867	17.48758014	17.91127053	17.74142844
0.909123639	0.211934156	432.7594879	6903.21102	0.8748	4.03E-05	24728.59728	3.67E-05	22466.69598	8.43E-06	5275.141061	0.915040677	69.48900804	451.2187668	7527.805576	0.9325	0.021379914	24223.64343	0.000387523	22643.5633	69.37255157	2884.412011	0.915821756	0.186383171	438.529292	7099.905677	0.8842	4.03E-05	24743.91145	3.69E-05	22657.87212	7.44E-06	4623.328432	0.906247455	70.27933203	445.0470614	7271.251355	0.9222	0.021618276	24206.12904	0.000391121	22405.79529	70.14737025	3279.400889	149.7129	160.6279	159.4543	7.628386041	7.650963442	7.616594482
0.951018707	0.090051458	211.9890652	8204.28259	0.9328	4.94E-05	20837.23821	4.71E-05	19792.23931	4.22E-06	1931.971269	0.944583792	66.67397796	217.0164762	8478.247451	0.9711	0.02054058	20424.89208	0.000383405	19674.34029	66.61507846	1256.487591	0.946610757	0.102093676	210.1916685	8056.499892	0.9266	4.94E-05	20859.19555	4.68E-05	19733.80405	4.92E-06	2145.787611	0.944207447	66.68053553	216.8706488	8467.148095	0.971	0.020542707	20417.97013	0.000383449	19654.81357	66.62193889	1259.428836	142.395	144.423	144.6698	13.12548571	14.73815697	14.36791453
0.941913902	0.103231403	187.0303622	7917.030362	0.9222	4.21E-05	24393.20267	3.97E-05	22952.62989	4.22E-06	2557.913251	0.939088602	67.2177704	191.3950592	8290.816691	0.9634	0.02069724	23898.8223	0.000378987	22893.26747	67.14750129	1747.461179	0.943465887	0.106945498	186.0417163	7957.579478	0.9229	4.21E-05	24404.7198	3.98E-05	23013.74155	4.36E-06	2651.475133	0.938017872	67.29678894	191.536631	8255.981814	0.9623	0.020720822	23912.03575	0.000379285	22888.2098	67.22425739	1771.442689	153.1213	156.7141	156.8115	17.30677285	13.81150829	14.16695337
0.948612844	0.095837367	181.1297193	8124.707217	0.9297	4.53E-05	22796.05572	4.30E-05	21582.08516	4.07E-06	2282.123588	0.947629381	66.3524649	187.1668546	8585.668648	0.9757	0.020439853	22368.33904	0.000377974	21611.83105	66.30101689	1200.967613	0.947558095	0.101768003	180.3842173	8085.563605	0.9276	4.51E-05	22854.85554	4.28E-05	21653.80191	4.49E-06	2333.006576	0.939244491	67.18279905	184.7501816	8296.638759	0.9639	0.02068955	22352.20376	0.000381737	21405.37066	67.1126703	1653.791783	149.1449	151.1317	150.6323	15.02361155	15.53304076	15.29677406
0.957958813	0.068658614	168.6475948	8447.917567	0.9438	4.45E-05	23575.20926	4.27E-05	22566.99208	2.95E-06	1635.932189	0.95400107	65.75416497	173.622308	8810.224705	0.9844	0.020258897	23111.6985	0.000374583	22491.66901	65.71505653	933.3432548	0.964560871	0.057971014	170.1611006	8672.699643	0.9522	4.45E-05	23576.38878	4.30E-05	22728.15336	2.45E-06	1394.81758	0.951030866	66.07042254	173.2451521	8701.954685	0.9798	0.020353776	23111.24199	0.000375967	22424.11949	66.02357828	1111.711982	152.5913	152.6413	152.7961	17.60289363	17.61410896	17.56968198
0.951282702	0.080838323	210.2463644	8225.468349	0.9352	4.24E-05	24175.60661	4.04E-05	22966.82423	3.26E-06	2011.748931	0.948229185	66.31107242	216.636792	8605.704497	0.9763	0.020424591	23696.39301	0.000375153	22908.87942	66.2602704	1266.002049	0.948797689	0.092101021	211.003439	8134.736271	0.9305	4.23E-05	24224.94777	4.02E-05	22987.38733	3.88E-06	2212.831381	0.944542295	66.65901369	214.5154947	8478.545352	0.9713	0.020529522	23693.92361	0.000376738	22819.05535	66.60136133	1430.167096	153.6583	155.5775	155.7121	13.68298729	14.43641901	14.21509105
0.950436678	0.085163364	174.6057847	8193.798072	0.9335	4.40E-05	23439.44874	4.19E-05	22264.58497	3.66E-06	2017.240707	0.94693956	66.38556194	179.6004922	8564.664684	0.9752	0.020449151	22976.81553	0.000376953	22202.25184	66.33501039	1188.517125	0.951025034	0.092995817	174.0786228	8200.842754	0.9323	4.40E-05	23471.95474	4.18E-05	22333.2659	4.07E-06	2160.921592	0.943187247	66.70492479	178.3152689	8438.711313	0.9706	0.020545876	22971.0373	0.000378409	22107.09107	66.64939452	1305.45374	151.3986	152.7998	152.9725	15.04110761	15.96686945	15.66109012
0.936671673	0.113271436	236.2836701	7752.796395	0.9155	3.67E-05	27596.86029	3.44E-05	25824.91743	4.06E-06	3160.4639	0.944464352	66.61518675	246.5322564	8479.828275	0.9719	0.020511302	27041.22225	0.000371123	26048.21447	66.56024478	1538.179237	0.952602424	0.081392865	242.7786798	8264.622517	0.9362	3.67E-05	27606.4358	3.50E-05	26283.33596	2.91E-06	2275.13448	0.940795008	66.99586136	243.955613	8352.622349	0.9665	0.0206257	27037.33616	0.000372871	25947.12054	66.9321285	1787.009519	166.8197	165.5277	164.7655	12.91711237	12.33020003	12.46656768
0.919034167	0.161804309	307.0276032	7211.295781	0.8912	3.57E-05	28203.79185	3.29E-05	25895.47656	5.66E-06	4605.366248	0.929302255	68.11809864	320.8138606	7972.048691	0.9509	0.020962496	27625.22063	0.000377075	26197.9277	68.030185	2508.631612	0.935059386	0.138678104	312.0680743	7675.338722	0.9093	3.57E-05	28201.85901	3.35E-05	26345.19805	4.83E-06	3955.536237	0.923995217	68.66444091	317.0754637	7800.646423	0.9435	0.021126621	27623.01017	0.000379571	26051.26151	68.56375551	2863.59894	170.0403	167.0079	166.3527	10.83407938	10.35309797	10.56672621
0.932843327	0.120403907	306.7888267	7637.492811	0.9111	3.82E-05	26337.71968	3.57E-05	24570.55979	4.55E-06	3172.024476	0.938593147	67.1647132	318.7962867	8281.692667	0.9641	0.020678415	25804.96836	0.000375002	24730.66317	67.09874746	1718.720154	0.94596714	0.0998381	311.7468969	8040.485159	0.9265	3.82E-05	26337.99806	3.62E-05	24916.42505	3.77E-06	2626.970426	0.931588681	67.86190277	313.3824392	8048.758592	0.9544	0.02088822	25780.94174	0.000378232	24513.62186	67.78070298	2139.858655	156.6578	164.5096	163.7155	10.69567666	10.37617983	10.34712326
0.948469471	0.098170075	236.3657696	8117.016792	0.929	3.97E-05	25502.94133	3.77E-05	24179.62554	3.84E-06	2516.858558	0.949205784	66.17808219	243.5747291	8643.115518	0.9782	0.020382334	25002.87814	0.000371906	24221.29944	66.13157002	1177.557044	0.957904014	0.077723508	238.893608	8433.572521	0.9418	3.97E-05	25520.72319	3.80E-05	24447.17679	3.08E-06	1963.863241	0.944401474	66.61498097	241.9587406	8478.13489	0.9719	0.020514202	24999.71304	0.000373887	24099.93014	66.56024498	1390.230888	154.7826	161.4338	160.4552	12.94175943	11.92719655	11.9996747
0.906643293	0.207283555	345.0971141	6844.969079	0.8732	3.56E-05	28226.82146	3.24E-05	25571.79482	7.25E-06	5889.060238	0.924224746	68.67288531	363.9168963	7805.744753	0.9434	0.021128756	27646.09805	0.000379519	26084.48231	68.57102328	2890.346195	0.926725205	0.151494943	353.1051462	7429.246304	0.8997	3.56E-05	28235.43792	3.30E-05	26155.09243	5.29E-06	4302.561076	0.916985569	69.34071696	358.9595506	7583.00535	0.9345	0.021329654	27632.4397	0.000382582	25866.44058	69.22408112	3319.717282	169.865	167.352	166.1368	9.760695416	9.702726215	9.721578357
0.919372596	0.168726129	307.0051674	7212.038643	0.8902	3.62E-05	27878.2268	3.34E-05	25596.53238	5.94E-06	4768.049202	0.928981176	68.06389239	320.1960908	7968.282892	0.9516	0.020947558	27321.17591	0.000377244	25901.82209	67.98014167	2361.218894	0.933613835	0.14137741	309.3036915	7631.505344	0.9075	3.62E-05	27889.37763	3.39E-05	26015.28039	4.97E-06	3992.921763	0.926527661	68.32053581	316.747495	7888.511233	0.9481	0.021024773	27306.72535	0.000378456	25811.65806	68.23109691	2532.549731	168.3771	166.2481	165.7719	11.01893351	10.82190124	10.96149946
0.911301609	0.194444444	338.8403916	6971.796903	0.8784	3.60E-05	27810.81922	3.29E-05	25313.12426	6.88E-06	5466.508538	0.926301677	68.37428752	359.7354866	7878.281191	0.9474	0.021040098	27243.99916	0.000378504	25751.92305	68.28151056	2611.164978	0.925829943	0.161261562	346.9340243	7394.128051	0.8973	3.60E-05	27821.42639	3.34E-05	25740.19818	5.67E-06	4549.684386	0.920190147	68.94445036	355.8096201	7688.591997	0.9397	0.021212223	27234.35884	0.000381137	25574.24372	68.84101673	2917.028307	168.0473	166.2115	165.7493	9.609883595	9.047616689	9.239937744
0.893776372	0.247432306	438.5788982	6495.669701	0.8568	3.56E-05	28048.7409	3.18E-05	25057.69106	8.71E-06	6975.625233	0.913040106	69.79108335	460.0906741	7459.405988	0.9286	0.021464898	27452.28311	0.000384599	25595.19182	69.66390711	3591.402757	0.910089932	0.212646958	444.8527565	6930.022486	0.8761	3.56E-05	28047.7635	3.24E-05	25514.06378	7.45E-06	6011.879123	0.901591171	70.88846364	450.9807545	7125.79322	0.9145	0.021795317	27435.40886	0.000389647	25261.43704	70.73800418	4255.641225	169.3672	166.974	165.6827	7.616361609	7.447880504	7.645078202
0.912638676	0.176563737	315.5157788	7033.825698	0.8841	3.54E-05	28386.93915	3.23E-05	25885.69807	6.11E-06	5074.20009	0.925341615	68.56164674	329.8530003	7841.170177	0.9449	0.021095045	27798.45063	0.000378799	26250.31536	68.46216875	2856.654037	0.928824274	0.148530227	322.1944537	7487.974376	0.9015	3.53E-05	28423.11181	3.28E-05	26399.9198	5.22E-06	4203.918913	0.919609889	69.0897846	326.1571764	7664.329708	0.9378	0.021254473	27804.49648	0.000381198	26103.75345	68.98049006	3116.415654	170.8719	167.4278	166.7731	10.13465788	9.935652327	9.903040765
0.887815393	0.265763111	429.8980554	6335.432764	0.8485	3.55E-05	28162.03041	3.15E-05	24975.19861	9.27E-06	7556.260577	0.907661634	70.29335213	456.8123848	7301.191953	0.9221	0.021615838	27569.48151	0.000386793	25550.20796	70.15497717	3934.96367	0.906708518	0.20852429	441.1333639	6843.692484	0.8728	3.54E-05	28185.11492	3.22E-05	25547.10109	7.29E-06	5913.456462	0.904819531	70.45885422	458.8715078	7227.216328	0.9199	0.021667435	27578.18122	0.000387519	25485.97495	70.32275724	3853.703446	170.1377	167.1749	165.9359	7.872606856	7.775249835	7.731739209
0.904289932	0.207529844	430.4954086	6786.290174	0.8712	3.70E-05	26903.51699	3.34E-05	24329.75181	7.66E-06	5576.301882	0.914926933	69.56161443	444.0871619	7518.981108	0.9316	0.021397285	26325.25333	0.000384822	24601.05378	69.43957083	3286.662516	0.916592442	0.178289325	431.094561	7128.335816	0.8862	3.70E-05	26898.98612	3.39E-05	24652.05158	6.57E-06	4794.675355	0.911755444	69.81728076	440.8121095	7428.6546	0.9282	0.021475523	26326.70965	0.000385984	24520.82574	69.69392827	3313.90056	164.3568	163.7806	163.3042	6.878436869	6.489611979	6.464074749
0.931982354	0.138790821	239.9393204	7588.697264	0.9064	4.37E-05	25153.16019	4.11E-05	23372.36263	5.39E-06	3638.921999	0.93737865	67.30056121	253.2560798	8239.654334	0.9622	0.020724408	24670.8942	0.000380824	23564.16415	67.23124358	1820.115049	0.940773271	0.123105441	242.2094646	7857.405626	0.9171	4.36E-05	25164.6647	4.12E-05	23616.32705	4.80E-06	3238.014502	0.931857038	67.85510739	248.686747	8056.213829	0.9545	0.020891261	24652.8021	0.000383358	23401.02412	67.77360192	2144.496909	156.9477	158.2481	156.7195	19.11448573	19.25765163	19.94608282
0.898415881	0.223417795	415.2836978	6629.879324	0.8643	3.62E-05	27480.7369	3.26E-05	24682.72898	8.06E-06	6142.777971	0.915597436	69.4607139	436.6126059	7542.173545	0.9329	0.021366783	26896.19112	0.000383674	25149.72909	69.34280626	3246.661378	0.916709419	0.199773499	422.1825595	7108.850283	0.883	3.62E-05	27481.14134	3.32E-05	25190.16516	7.17E-06	5513.191053	0.906661865	70.25550136	429.0253659	7282.483794	0.9225	0.021607254	26893.45322	0.000387293	24911.37012	70.12455756	3603.51122	166.7649	165.3025	164.9313	6.991496835	6.845333721	6.909875564
0.923418908	0.157718495	262.9700859	7333.278826	0.8959	3.97E-05	25423.50999	3.68E-05	23445.86997	6.08E-06	4083.960487	0.934631258	67.57345576	275.9173623	8147.707846	0.9584	0.020802645	24914.27014	0.000378314	23754.04752	67.49781176	1961.272851	0.940947472	0.123051771	269.4420708	7863.563924	0.9175	3.97E-05	25437.80381	3.74E-05	23915.50425	4.74E-06	3182.425504	0.930529791	67.91883389	274.8766779	8017.614933	0.9536	0.020907159	24910.52003	0.000379873	23647.4203	67.83756605	2104.142303	157.6526	159.985	159.2176	12.11628298	10.93882878	11.27787437
0.909668975	0.197356427	332.3746582	6932.692343	0.8776	3.52E-05	28445.31438	3.21E-05	25843.53895	6.80E-06	5689.657703	0.922307517	68.87583714	346.0726055	7743.708834	0.9407	0.021188864	27876.73211	0.000380028	26248.41079	68.76783622	3090.033805	0.925983239	0.150517299	338.3540995	7408.832907	0.8989	3.52E-05	28473.5114	3.26E-05	26352.01811	5.23E-06	4304.530982	0.917065834	69.30805434	341.4323457	7588.025778	0.9349	0.021320096	27875.12793	0.000381995	26102.75054	69.19446325	3247.822869	171.5376	167.598	166.6142	9.023424308	9.166864022	9.118758598
0.904156189	0.218031279	344.0584177	6772.828887	0.8696	3.56E-05	28346.59625	3.22E-05	25610.17161	7.57E-06	6237.947102	0.920323927	69.02322361	361.5880473	7685.646639	0.9387	0.021234304	27759.29882	0.000381067	26079.484	68.91435342	3106.876425	0.925281263	0.173261793	350.5419182	7365.678516	0.8946	3.55E-05	28356.35804	3.29E-05	26223.83986	6.02E-06	4946.626872	0.912203861	69.82814352	355.5678267	7437.455985	0.9281	0.021476439	27738.6328	0.000384791	25826.4564	69.70143742	3632.453615	170.3791	167.6625	166.2341	10.30735578	10.23584846	10.31681623
0.933679231	0.146543169	265.3078619	7628.566656	0.9069	3.92E-05	25951.14224	3.67E-05	24211.57177	5.58E-06	3833.200463	0.93713543	67.44069562	277.6674997	8222.624909	0.9603	0.020761094	25403.05717	0.00037731	24277.71191	67.36426403	2030.010413	0.942033196	0.111424848	270.608384	7910.341225	0.9208	3.92E-05	25930.40867	3.71E-05	24394.82361	4.19E-06	2951.40758	0.932319597	67.90983435	274.1138603	8063.548543	0.9538	0.02090233	25392.05001	0.000379471	24141.79676	67.82334145	2305.972845	154.586	163.6774	162.2516	13.37632999	12.2908311	12.53442848
0.942370126	0.102828042	229.0797486	7931.639723	0.9229	4.02E-05	25230.06685	3.80E-05	23750.77248	4.02E-06	2638.67017	0.944143438	66.63565253	235.7982709	8469.746809	0.9716	0.020521079	24730.00371	0.00037455	23815.68042	66.58079671	1402.399341	0.953006709	0.088030805	230.5734303	8267.194673	0.9349	4.02E-05	25252.40678	3.84E-05	24056.43227	3.46E-06	2234.544122	0.942453289	66.81940144	234.627451	8409.906295	0.969	0.020576032	24729.50826	0.000375381	23775.20963	66.75944507	1532.416202	156.9794	159.1972	158.088	13.30195383	12.43674042	12.69891554
0.930587266	0.144469027	259.9533186	7542.289159	0.904	3.63E-05	27970.3156	3.38E-05	26015.82677	5.13E-06	4068.193695	0.941109373	67.00455298	273.8029801	8360.085679	0.9664	0.02062743	27394.30205	0.000372534	26301.79126	66.93905445	1859.132554	0.947845614	0.098567274	267.4248627	8097.667672	0.9283	3.63E-05	27953.82118	3.45E-05	26470.63111	3.45E-06	2801.75676	0.935196029	67.62775399	270.3440535	8158.212906	0.9577	0.020814496	27388.77582	0.000375409	26135.76072	67.54714703	2282.34729	169.2613	166.1235	165.2545	12.51480812	12.24003463	12.31012306
0.897347241	0.242589794	438.3423224	6583.948041	0.8603	3.52E-05	28329.30117	3.16E-05	25412.96401	8.46E-06	6895.648378	0.908964785	70.17691641	458.7869207	7338.704634	0.9236	0.021580526	27729.62733	0.000385996	25748.57306	70.04103983	3848.847012	0.908182128	0.218148488	443.5348304	6871.661778	0.8728	3.52E-05	28327.75481	3.20E-05	25717.38488	7.60E-06	6204.438932	0.902654963	70.70309773	454.6287086	7162.398342	0.9168	0.021740344	27716.44732	0.000388422	25555.69834	70.56054162	4052.136562	170.7579	167.5127	166.4243	7.212217938	7.222079943	7.32999792
0.955649933	0.081478326	155.2899137	8358.025668	0.9389	8.25E-05	14342.19033	7.93E-05	13659.3263	5.62E-06	1289.966131	0.95172568	65.97309417	160.2435793	8728.984305	0.9812	0.020361818	14091.99501	0.000411742	13661.53873	65.92937536	665.8275581	0.955009812	0.074582402	156.1526758	8348.2629	0.9399	8.23E-05	14385.91361	7.89E-05	13719.35005	5.44E-06	1121.183849	0.945918533	66.49060286	158.919277	8528.305536	0.9737	0.020518144	14084.30348	0.000414024	13568.93238	66.43720208	813.6621136	115.1621	119.6089	119.5542	19.86430023	21.42438192	21.34512268
0.943929313	0.111327913	185.9662873	7966.152304	0.9225	7.33E-05	15475.19404	6.96E-05	14553.57497	7.05E-06	1841.338103	0.941018112	67.00372517	192.8853477	8358.174876	0.9664	0.020663406	15202.61972	0.000407348	14581.19696	66.9390563	1045.92529	0.944093122	0.106922327	187.0441989	7975.110281	0.9231	7.31E-05	15518.48077	6.93E-05	14626.49308	7.12E-06	1709.297909	0.937408279	67.27134843	191.574278	8242.45294	0.9626	0.02074473	15194.59007	0.000408498	14513.33812	67.20330791	1106.147205	119.8536	124.8552	124.7154	17.72569229	19.2884067	19.05533004
0.937701706	0.115964184	241.1856301	7778.333697	0.9158	6.26E-05	16465.4477	5.89E-05	15417.05365	6.90E-06	1956.646211	0.938677435	67.20944473	248.629891	8280.328282	0.9635	0.020715058	16141.09798	0.000398105	15454.39687	67.14053343	1157.295589	0.94034341	0.116775599	241.8989107	7853.586057	0.918	6.25E-05	16485.68606	5.89E-05	15494.85128	7.03E-06	1946.401089	0.932941614	67.83745287	247.0858819	8084.386678	0.9548	0.020903293	16128.0753	0.000400928	15342.35103	67.75230921	1433.938102	122.5372	130.4236	129.4376	12.19001297	12.71916519	12.32670703
0.966229635	0.057121895	114.7876533	8728.331936	0.9541	0.000165783	8005.283933	0.000160386	7726.514453	8.95E-06	483.9952835	0.951611001	65.96545399	117.292673	8726.49251	0.9813	0.02044135	7858.200143	0.000490623	7632.233101	65.92266057	346.0975237	0.957584101	0.080340064	113.0439957	8420.042933	0.941	0.000164984	8039.592455	0.00015761	7714.145542	1.38E-05	623.0350691	0.951649163	65.95140092	117.495568	8728.620581	0.9815	0.020437418	7843.66164	0.000490963	7605.581814	65.9092274	350.9267448	84.5386	87.3106	87.0336	21.85927515	24.49996587	23.62448457
0.958286949	0.073579304	146.4639525	8452.004877	0.9432	8.75E-05	12860.0986	8.41E-05	12302.05299	5.88E-06	1001.50212	0.95480289	65.66531399	151.0854215	8839.857868	0.9857	0.020274274	12624.75763	0.000415228	12292.28739	65.62838892	487.3894694	0.961310989	0.06435957	146.9637054	8559.608778	0.9478	8.74E-05	12880.63526	8.41E-05	12374.78886	5.26E-06	853.4341633	0.948304266	66.25370996	149.8480196	8612.395354	0.9771	0.020451989	12615.03459	0.000417657	12194.06194	66.20602174	629.0609968	105.8428	114.8674	113.7596	18.30789688	19.49174228	19.28759207
0.952909494	0.086496311	121.6494173	8266.697851	0.9353	0.000124575	10241.17085	0.000119255	9732.696186	9.44E-06	945.0603015	0.949762982	66.12339122	126.5897855	8662.24474	0.979	0.020448576	10053.71226	0.000452306	9730.796441	66.07753317	492.3529111	0.958492798	0.065396825	123.2660317	8469.277884	0.945	0.00012424	10264.47354	0.000119461	9828.242023	7.53E-06	695.075873	0.947691543	66.38802297	125.7897867	8585.278302	0.9752	0.020527548	10054.07168	0.000452898	9715.364137	66.3350142	577.3319319	94.9696	100.8638	99.9112	20.2046746	23.39373526	22.43046398
0.929148912	0.139887206	301.2572155	7511.147739	0.9043	5.99E-05	16847.25788	5.58E-05	15637.55414	8.11E-06	2402.320027	0.930121487	68.09134868	309.1210974	7994.29549	0.9513	0.020977378	16496.50194	0.000399506	15648.9362	68.00158199	1539.130874	0.925684857	0.164362177	297.5651204	7387.430865	0.8968	5.99E-05	16839.50368	5.56E-05	15565.67527	9.54E-06	2820.885147	0.919593518	69.0513695	305.0181179	7666.703719	0.9383	0.021267179	16495.31109	0.000403629	15476.90007	68.9437343	1837.00405	124.4749	131.9823	131.2041	9.589888946	9.861337978	9.54195175
0.929110724	0.137801371	281.8292413	7510.568901	0.9042	5.87E-05	17346.22694	5.46E-05	16098.73043	7.79E-06	2437.916058	0.928297175	68.19065165	288.5018423	7941.737341	0.9499	0.021006968	16992.9462	0.000398733	16092.31354	68.10180524	1557.551216	0.925145003	0.160499331	277.8954525	7378.172314	0.8972	5.87E-05	17357.50847	5.44E-05	16045.70168	9.15E-06	2804.191819	0.924361027	68.61237026	288.1785639	7813.190002	0.9442	0.021133408	16992.97543	0.000400541	16028.12117	68.51292668	1741.948846	127.0451	133.3783	132.8602	11.01058881	11.13148638	11.01994809
0.947324766	0.095843205	188.781176	8086.385096	0.9286	6.26E-05	16733.9664	5.94E-05	15836.88112	5.77E-06	1630.421925	0.943822006	66.69303667	193.6753193	8456.291512	0.9708	0.020559835	16408.19427	0.000395919	15803.11503	66.63566477	965.3743304	0.953780018	0.091434071	190.093359	8286.83082	0.9351	6.26E-05	16749.77008	5.98E-05	15972.21631	5.53E-06	1537.06363	0.940869385	66.9886199	192.3302297	8355.296917	0.9666	0.020648925	16399.52193	0.000397242	15741.50266	66.92520554	1075.718498	121.8411	131.6787	130.8467	15.10151154	15.20426474	15.0893936
0.942633455	0.103717351	220.3052997	7937.116614	0.9227	7.27E-05	14326.07467	6.88E-05	13471.76108	7.06E-06	1548.417579	0.94175365	66.88224357	226.758496	8386.664084	0.9681	0.020626785	14051.54684	0.000406191	13489.44662	66.82151019	904.3277554	0.947932381	0.096996447	222.7702659	8102.92292	0.9289	7.25E-05	14360.39423	6.88E-05	13608.3913	6.79E-06	1419.132522	0.939674583	67.12418368	225.6091013	8313.198404	0.9647	0.020699257	14046.21105	0.000407283	13452.18851	67.05701713	1000.126879	110.7779	123.0713	121.7258	12.74641799	13.46110754	13.2086568
0.93586771	0.121892454	223.9416274	7718.881503	0.9131	8.40E-05	12348.23393	7.87E-05	11558.67021	1.00E-05	1497.278721	0.931716689	67.87037619	230.2886933	8051.089699	0.9543	0.020935031	12103.33973	0.00042065	11524.76316	67.78780955	1000.467882	0.925647942	0.150389321	221.1679644	7401.491212	0.899	8.39E-05	12359.29177	7.77E-05	11449.8807	1.26E-05	1826.946274	0.934046897	67.63832898	230.9590601	8128.013681	0.9575	0.020865494	12090.54078	0.000419961	11529.06879	67.56125965	943.1277285	99.9326	115.5477	111.9885	12.74871983	12.40682573	12.21305726
0.964095636	0.066849142	145.2174966	8645.154543	0.9499	0.000182967	6720.448889	0.000175738	6502.15877	1.30E-05	415.4284662	0.952667286	65.87685732	148.4754732	8763.032363	0.9826	0.020431465	6585.145634	0.000506125	6422.442392	65.8354453	241.9550173	0.959206164	0.067498942	144.433559	8488.682818	0.9452	0.000182941	6728.43959	0.000174863	6481.120208	1.34E-05	404.4621244	0.952199129	65.91070156	148.0444965	8747.220955	0.9821	0.020442188	6583.846553	0.000506917	6417.393143	65.86896259	246.1454027	80.1354	79.3295	80.313	18.7764711	18.72196917	18.20353897
0.919832773	0.162780269	326.6035874	7232.639462	0.892	5.91E-05	16986.92578	5.44E-05	15612.9748	9.41E-06	2800.380045	0.927750516	68.32602046	337.5883346	7917.691699	0.9481	0.021047183	16636.63348	0.000399733	15751.17246	68.23109926	1627.017825	0.920377005	0.178639685	323.9632378	7227.931984	0.8895	5.91E-05	16997.86712	5.44E-05	15638.7989	1.04E-05	3046.929961	0.914205969	69.58870275	331.4375	7501.256229	0.9312	0.021428075	16635.84192	0.000405173	15529.7124	69.46940129	2033.382947	124.5238	132.892	131.583	8.769391858	8.869832918	8.713421314
0.944957205	0.112676056	181.2873239	7994.301842	0.923	6.04E-05	17312.30423	5.72E-05	16328.28614	6.36E-06	2029.996858	0.944830585	66.6887424	188.1684005	8484.428159	0.9709	0.020555466	16983.28798	0.000393786	16363.79459	66.62880145	1068.002266	0.949950234	0.08695186	184.1266216	8176.789857	0.9327	6.03E-05	17329.02573	5.74E-05	16440.12283	5.00E-06	1543.350488	0.941954448	66.90493904	187.4569126	8390.227113	0.9678	0.020621141	16975.29345	0.000394741	16301.29599	66.84222303	1122.985018	124.5021	133.7433	133.5117	16.34710358	14.56530827	14.95084155
0.931252547	0.14162616	179.5872735	7564.712992	0.9052	7.47E-05	16522.6276	7.02E-05	15324.52054	8.85E-06	2478.323685	0.92940201	68.12599916	187.4396298	7974.070677	0.9508	0.021002396	16187.26241	0.000413197	15306.15889	68.037343	1575.376315	0.915072406	0.184296866	176.2376966	7082.322774	0.8839	7.42E-05	16535.07026	6.81E-05	15085.68817	1.25E-05	3217.501867	0.925076634	68.56858594	184.8545724	7833.945597	0.9448	0.021135283	16206.02604	0.000414939	15273.3502	68.46941801	1737.182578	124.0113	128.6726	128.2035	20.02710594	21.38587873	21.304978
0.955939921	0.080149015	185.0589675	8369.376583	0.9395	6.92E-05	15426.97786	6.63E-05	14737.32834	5.27E-06	1257.747951	0.952098865	65.92453407	190.1575517	8743.347693	0.9819	0.020334539	15134.98595	0.000398835	14708.64155	65.88237374	645.8830838	0.957529333	0.069762511	185.4349025	8433.018448	0.9432	6.92E-05	15439.53085	6.64E-05	14783.25933	4.62E-06	1082.16497	0.945348871	66.50261941	188.4397535	8512.320596	0.9735	0.020509445	15121.83482	0.000401316	14586.62069	66.45085089	806.9151515	114.9639	126.9537	126.1259	15.84098472	16.4440067	16.15814498
0.939849135	0.117191758	168.3395836	7837.838984	0.9173	8.07E-05	14932.42407	7.68E-05	13959.57356	7.53E-06	1893.78295	0.937907632	67.29491842	175.2279954	8253.966642	0.9623	0.020758015	14673.6314	0.000415323	14011.12846	67.22425922	1122.507118	0.923317224	0.15901218	164.7872388	7326.318807	0.8949	8.05E-05	14973.20662	7.51E-05	13780.69935	1.11E-05	2476.432339	0.930054502	68.0909282	171.7591717	7992.676233	0.9513	0.020997478	14652.93251	0.00041921	13866.97995	68.00158255	1435.849259	117.9706	122.4858	121.317	18.94430615	20.72683764	20.51627917
0.95595521	0.079706289	132.874428	8370.287006	0.9397	0.000116898	10312.54869	0.000112169	9836.890586	8.26E-06	879.9248696	0.949787645	66.13024824	137.1746859	8662.761978	0.9789	0.020443132	10118.36235	0.000444919	9793.588418	66.08428323	497.9038717	0.948414194	0.097427064	131.4000431	8115.623103	0.9289	0.000116188	10359.43503	0.000110132	9834.407709	1.13E-05	992.1599742	0.945028706	66.53833505	135.8100719	8500.401644	0.973	0.020566455	10122.08633	0.0004465	9753.806035	66.48500055	574.1027749	95.5387	101.5987	100.7847	18.25539105	21.88741781	21.12202514
0.937794025	0.113051069	194.2426888	7784.574422	0.9164	9.67E-05	11212.70526	9.10E-05	10492.66708	1.02E-05	1319.89677	0.93583468	67.458125	200.270625	8187.76625	0.96	0.020823639	11001.28375	0.000431082	10501.67602	67.3853191	834.1842708	0.935915895	0.120814183	193.5789013	7723.798424	0.9138	9.67E-05	11216.76286	9.08E-05	10480.60268	1.07E-05	1416.012038	0.93376075	67.64466263	199.1372467	8120.321287	0.9574	0.020880105	10984.56633	0.00043211	10451.0515	67.56831674	893.6297263	94.7597	109.9345	106.6413	12.9702643	16.34981375	15.50676737
0.958014388	0.082925792	145.887306	8429.298108	0.9406	0.000159431	7552.699341	0.000153061	7231.11467	1.24E-05	644.6189666	0.950012535	66.16680294	149.9883483	8666.174162	0.9784	0.020494902	7418.088001	0.000484908	7198.935801	66.11805761	359.2400859	0.951142111	0.09219554	144.4629074	8206.418096	0.9328	0.000158432	7599.715909	0.000150341	7255.033719	1.52E-05	646.2069039	0.947342196	66.39493385	148.8759102	8574.242129	0.9751	0.020564087	7414.967183	0.000486267	7173.734675	66.34181924	392.5284586	84.0474	85.2794	85.7694	18.16388046	19.21465419	18.47483758
0.908888667	0.198037874	474.8660735	6910.724162	0.8766	6.07E-05	16503.83653	5.53E-05	14979.53913	1.17E-05	3317.863678	0.903846325	70.51240209	484.7969974	7202.0755	0.9192	0.021708559	16165.67374	0.000410549	14921.3781	70.37631362	2261.360422	0.887913116	0.264310954	461.1724382	6340.253475	0.849	6.08E-05	16500.8563	5.41E-05	14628.13489	1.56E-05	4418.916843	0.901278267	70.81254097	479.8514311	7124.920909	0.9154	0.021798518	16148.51191	0.000412032	14851.41019	70.66845947	2409.165174	131.7268	127.9448	123.6648	7.48365965	7.48710578	7.574737022
0.871014093	0.309196235	606.6210476	5923.159788	0.8286	6.70E-05	14803.95474	5.84E-05	12885.56387	2.05E-05	4600.626478	0.875315768	73.53910678	623.4792564	6413.079574	0.8822	0.022622704	14472.3005	0.0004293	12946.42155	73.32794424	3137.190546	0.847987577	0.411042945	583.3465632	5380.52022	0.7987	6.71E-05	14791.54438	5.70E-05	12525.29	2.72E-05	6131.913735	0.870828732	73.86576341	617.9201867	6308.338039	0.8783	0.02272289	14465.32996	0.000430688	12871.90088	73.65354931	3164.876124	124.6632	121.3564	117.6776	5.033861913	5.135793906	5.12061112
0.895843895	0.234651163	569.2230233	6554.523023	0.86	6.27E-05	15768.96209	5.62E-05	14133.47605	1.48E-05	3673.996744	0.897666933	71.17720685	583.1242863	7022.049407	0.9108	0.02191031	15421.5617	0.000415309	14153.09391	71.02537188	2380.788538	0.872352289	0.302454283	550.9992782	5961.601059	0.8312	6.27E-05	15769.6309	5.47E-05	13765.83744	1.90E-05	4747.104427	0.890942706	71.84698061	577.5976731	6835.083102	0.9025	0.022111246	15415.69452	0.000418204	14043.06242	71.67857014	2646.479446	128.2756	125.2526	121.4916	4.55014776	4.479262578	4.583397151
0.883606067	0.248113208	601.2599057	6259.208255	0.848	6.05E-05	16338.94658	5.34E-05	14444.80891	1.51E-05	4030.021344	0.887856679	71.95305737	618.3942959	6766.11153	0.9011	0.022143305	15975.23039	0.000416573	14504.00539	71.78993334	2650.996005	0.865875999	0.33138899	585.6285089	5804.379998	0.8229	6.05E-05	16330.84713	5.24E-05	14142.36503	2.01E-05	5406.456556	0.884499818	72.31236757	613.4271217	6674.440393	0.8967	0.022251653	15975.58358	0.000418136	14452.4627	72.14219837	2763.025761	130.2342	127.457	123.9558	4.058737533	4.217789824	4.491374663
0.903793629	0.20463675	483.9241363	6777.43613	0.8713	5.94E-05	16705.31723	5.37E-05	15102.80801	1.22E-05	3397.854929	0.898301069	70.99868565	490.5415115	7048.271632	0.913	0.021854373	16342.58883	0.000411472	15007.15005	70.8542255	2390.223549	0.878060742	0.266175071	473.612274	6118.244053	0.8408	5.94E-05	16707.03176	5.21E-05	14676.78926	1.59E-05	4423.870837	0.899696991	70.89631412	495.9025484	7085.276496	0.9143	0.021823384	16341.00733	0.000411041	15028.48064	70.75348112	2371.840424	132.8936	128.1602	125.123	5.462021516	5.726075092	5.679478057
0.891545465	0.232403408	532.2211976	6455.365355	0.8567	6.01E-05	16466.50496	5.36E-05	14676.23918	1.39E-05	3845.275009	0.89440877	71.43900826	546.7520661	6935.493444	0.9075	0.021987165	16113.46182	0.000414067	14729.18239	71.28364569	2556.49708	0.86770214	0.325567286	518.909477	5840.949035	0.8241	6.01E-05	16473.19512	5.22E-05	14293.05134	1.95E-05	5366.095862	0.895286487	71.44319559	546.7201102	6953.076033	0.9075	0.021987153	16116.67548	0.0004141	14748.40105	71.28364597	2619.81146	131.5405	127.8125	124.238	4.732098874	4.850169456	4.799349539
0.898232641	0.203923832	397.8540104	6641.801616	0.8665	6.42E-05	15519.54553	5.76E-05	13941.55784	1.30E-05	3180.507213	0.897791674	71.19679332	404.0994948	7022.68702	0.9106	0.021916454	15184.77949	0.000416643	13934.30893	71.04097198	2419.830332	0.875605043	0.292285577	381.3691902	6038.379732	0.8348	6.42E-05	15522.0327	5.62E-05	13590.98548	1.87E-05	4539.21586	0.889838338	71.78277236	400.5088574	6817.842117	0.9032	0.022095463	15190.91154	0.000419031	13824.4912	71.62301737	2464.439548	126.6387	124.2975	120.9815	6.763221297	6.568895931	6.791800774
0.887193712	0.256355932	491.0461394	6331.631591	0.8496	6.19E-05	16023.15101	5.49E-05	14209.61934	1.58E-05	4123.232227	0.890180593	71.86832188	504.3269785	6818.403015	0.9022	0.022117669	15676.37264	0.00041747	14263.36561	71.70240436	2665.092219	0.859059882	0.360314922	467.5055972	5634.726412	0.8129	6.18E-05	16031.44507	5.31E-05	13771.41941	2.22E-05	5776.973921	0.883428111	72.68665247	495.1918637	6626.844447	0.8923	0.02236236	15678.51025	0.00042105	14164.38433	72.49793836	3020.552841	129.6272	126.202	121.5776	5.12347735	5.258478487	5.39338282
0.894913995	0.236842105	599.7519795	6529.77061	0.8588	6.26E-05	15784.02189	5.60E-05	14131.17351	1.49E-05	3722.400908	0.897031203	71.23316119	616.8670476	7004.599165	0.9101	0.021926999	15438.84167	0.000415435	14159.55197	71.08000084	2405.912647	0.872137231	0.301396245	583.264805	5955.550313	0.8308	6.26E-05	15792.73231	5.46E-05	13785.62554	1.90E-05	4726.198243	0.88853152	72.05789532	608.0916769	6771.630959	0.8999	0.022174824	15434.76809	0.000418979	14024.68755	71.88566479	2705.076897	128.2892	125.3201	121.6384	4.304156521	4.178305397	4.277714979
0.877740117	0.272229496	571.9425068	6108.502678	0.8401	6.58E-05	15016.92346	5.78E-05	13180.84468	1.79E-05	4079.518986	0.883890712	72.73267549	585.0204082	6632.5342	0.8918	0.02237878	14682.44741	0.000424824	13268.87627	72.53858647	2906.906593	0.86450283	0.330084075	559.9640551	5768.709273	0.8207	6.59E-05	15009.3023	5.70E-05	12972.33022	2.16E-05	4972.474839	0.879397412	73.2033401	581.1688107	6513.013315	0.8862	0.022519786	14678.61386	0.000426856	13198.87325	72.99696687	3095.209998	126.2135	121.6397	117.4495	4.068699762	4.38115098	4.877073892
0.86885459	0.304820587	650.0109943	5882.720672	0.8277	6.51E-05	15170.47976	5.65E-05	13185.00057	1.99E-05	4610.074906	0.872341282	73.87168393	657.6462484	6335.392121	0.8783	0.022721069	14816.27838	0.00042911	13216.42347	73.65354939	3317.946943	0.850985363	0.372237398	628.5622051	5467.268935	0.8054	6.51E-05	15172.05053	5.54E-05	12916.14503	2.43E-05	5629.266203	0.872690759	73.90113895	659.446697	6339.70615	0.878	0.022728747	14830.74317	0.00042916	13244.89118	73.67871612	3359.187244	126.6506	122.2712	119.5277	3.789237343	3.700385191	3.718498717
0.859538855	0.334801762	631.5359765	5670.047479	0.8172	6.81E-05	14489.24633	5.86E-05	12460.6924	2.29E-05	4829.90859	0.872197575	73.75534334	654.4392906	6340.824011	0.8796	0.022690574	14151.10277	0.000431212	12622.13581	73.54469375	3049.454525	0.854757515	0.364141851	630.9977759	5547.074385	0.8093	6.82E-05	14471.73755	5.84E-05	12362.31874	2.48E-05	5273.874459	0.869437482	74.10278666	652.6544084	6266.828004	0.8756	0.022793904	14152.81738	0.000432698	12587.08795	73.88066842	3210.931133	123.4558	119.7428	116.7766	3.810412886	3.651608982	3.878052661
0.857317251	0.35046729	647.6920807	5610.665765	0.8132	6.71E-05	14720.54722	5.75E-05	12623.22613	2.35E-05	5147.351328	0.868806679	74.27999084	665.9496337	6243.374084	0.8736	0.022844835	14386.7516	0.000432524	12788.59389	74.04980945	3373.067193	0.848548627	0.393151712	638.5156211	5398.112472	0.8002	6.71E-05	14718.55011	5.69E-05	12492.34021	2.64E-05	5786.509748	0.867582159	74.19291023	669.0349914	6227.60446	0.8745	0.022821407	14383.80332	0.000432071	12767.2351	73.97359961	3227.558033	124.9609	120.4463	116.8498	3.542113944	3.687481025	4.113640718
0.893728351	0.220969429	593.7836801	6518.337208	0.8603	5.94E-05	16658.92014	5.30E-05	14897.32817	1.32E-05	3656.293037	0.894857193	71.45938499	603.7589551	6942.854954	0.9073	0.021991306	16283.13171	0.000413531	14892.88301	71.29935923	2658.862669	0.876069235	0.311337732	574.9409718	6037.009598	0.8335	5.94E-05	16652.68158	5.20E-05	14592.43698	1.85E-05	5164.25099	0.886293421	72.44286831	597.2256227	6699.761086	0.8953	0.022285242	16285.08857	0.000417813	14761.19435	72.25500953	3110.590528	131.9007	128.5473	125.5871	4.251945379	4.219900794	4.305416773
0.869383771	0.304998793	684.9785076	5894.336151	0.8282	6.56E-05	15039.66131	5.71E-05	13074.57966	2.00E-05	4590.924656	0.870570059	73.8736051	695.8241858	6303.12685	0.8782	0.022724125	14701.02721	0.000429448	13089.85436	73.661936	3182.530859	0.845463065	0.396216961	656.8233747	5342.107604	0.7983	6.56E-05	15039.10334	5.55E-05	12712.97083	2.60E-05	5957.921709	0.863712801	74.4228034	690.0814407	6144.09727	0.8718	0.022890443	14703.20475	0.000431694	12994.9405	74.20269856	3305.67309	125.5867	122.3881	118.5631	3.493720525	3.508999628	3.661614178
0.884728471	0.24649629	595.4651984	6285.72147	0.8491	6.05E-05	16338.86197	5.35E-05	14462.80553	1.50E-05	4005.284301	0.889038643	71.83900277	612.6192798	6797.817507	0.9025	0.022109055	15975.5672	0.000416089	14522.83607	71.6785693	2608.823269	0.866616478	0.33001457	579.7277805	5820.48033	0.8236	6.05E-05	16332.12567	5.25E-05	14156.40264	2.00E-05	5382.40323	0.884942343	72.26289981	607.3570712	6686.607712	0.8973	0.022236823	15975.26557	0.000417929	14458.43101	72.09395878	2744.518221	130.2304	127.4601	123.9522	4.106326319	4.266826454	4.548594856
0.880657678	0.257136089	550.176596	6184.801966	0.8443	6.01E-05	16472.5093	5.29E-05	14518.87238	1.56E-05	4202.666706	0.887976397	72.17395659	558.7511408	6752.399666	0.8985	0.022206794	16097.43929	0.000417259	14617.00622	71.99767339	2890.960824	0.866964679	0.325728155	534.4759709	5828.476699	0.824	6.01E-05	16462.19939	5.21E-05	14276.66482	1.96E-05	5338.659466	0.883129071	72.68665247	553.2111398	6620.898913	0.8923	0.022360687	16092.81363	0.00041951	14534.29749	72.49793806	3099.115208	130.6953	128.0471	123.8633	4.38242603	4.444398901	5.119278573
0.888161151	0.236431837	505.308053	6371.946196	0.8531	6.28E-05	15800.36959	5.57E-05	14046.26961	1.50E-05	3700.031766	0.895357386	71.39312851	518.5940976	6958.224315	0.9081	0.021975342	15446.26198	0.000416287	14142.12251	71.23654771	2457.797489	0.867827048	0.309134906	487.1599516	5858.551603	0.8265	6.28E-05	15790.90067	5.45E-05	13712.17631	1.95E-05	4867.758016	0.887858329	72.17195326	511.9426822	6750.386978	0.8985	0.022209474	15440.66544	0.000419686	14018.99943	71.99767379	2732.708625	127.6947	125.4899	121.6795	6.066110114	5.355679041	5.561221066
0.891934877	0.236660829	581.0240514	6460.878342	0.8565	5.97E-05	16576.35715	5.32E-05	14796.342	1.42E-05	3892.830239	0.88808352	72.25949861	584.9656825	6748.410585	0.8975	0.02223105	16206.12123	0.000417279	14721.19079	72.07789392	2984.752981	0.870703231	0.326806865	565.9108049	5910.006526	0.8274	5.97E-05	16568.85944	5.20E-05	14431.21164	1.96E-05	5385.118564	0.89267978	71.62527618	593.8254529	6886.50707	0.9052	0.022042481	16200.653	0.000414501	14783.80582	71.46476877	2649.511158	131.4622	128.307	125.0014	4.289145738	4.218880302	4.339723268
0.874566978	0.305215093	673.7933189	6004.174718	0.8322	6.61E-05	14966.85677	5.79E-05	13080.60847	2.00E-05	4594.534367	0.875253597	73.48550068	687.8849116	6415.710693	0.8828	0.022606514	14639.89556	0.000428247	13101.98964	73.27810608	3111.212619	0.850758687	0.374891345	649.566497	5462.919781	0.8053	6.61E-05	14965.24289	5.63E-05	12721.1109	2.46E-05	5640.411027	0.867728682	74.05147814	678.8328958	6240.180459	0.8761	0.022778909	14633.75414	0.000430611	12983.35262	73.83850275	3199.692615	125.2027	122.2231	118.1401	4.276822735	4.357008881	4.366081995
0.877190381	0.270086894	123.0202357	6099.403285	0.8401	0.000115746	18157.17379	0.000106737	15664.23675	1.76E-05	5571.103202	0.872305592	74.07339345	130.6411369	6320.730168	0.8761	0.022822641	17931.43488	0.000471389	15885.28458	73.83850987	4646.291063	0.888571409	0.328335118	118.6803523	6295.583363	0.8403	0.000116901	17934.07914	0.000109275	15561.62699	1.89E-05	7251.71534	0.889861794	72.37431664	127.244561	6775.166462	0.8963	0.022315838	17638.92636	0.000473221	15721.19712	72.17439392	4449.680687	137.5097	130.8842	121.2866	34.11482824	34.04467639	33.26717091
0.882431497	0.267179184	408.2033116	6222.349024	0.8455	0.000150761	22634.45038	0.000137016	19640.878	2.93E-05	6903.266115	0.873987238	74.27574371	384.5347826	6337.627689	0.874	0.022922109	21866.79828	0.00051905	19053.33797	74.01592312	7118.985355	0.85595697	0.447197197	345.4884885	5500.573323	0.7992	0.000161241	22127.08671	0.000147841	18298.16853	2.94E-05	12237.13388	0.851785723	76.3178987	391.7173581	5815.929839	0.8509	0.023536272	22108.68657	0.000519375	18977.41536	76.02529609	7544.4004	145.837	145.1842	145.579	42.36294172	43.94590618	47.01261489
0.908997977	0.18589306	113.6279863	6928.488055	0.879	0.000292873	16710.70171	0.000264805	14943.24011	5.48E-05	3665.139477	0.891920428	71.8350504	113.3316717	6855.565858	0.9027	0.022334469	16242.2333	0.000626349	14517.74842	71.66272289	3642.184114	0.914324008	0.219589977	104.0744875	7027.606378	0.878	0.000305077	16246.54533	0.00028526	14340.27414	4.16E-05	5252.564692	0.914730868	69.93052859	112.7406688	7486.595685	0.927	0.021761531	16040.2479	0.000631451	14578.26434	69.78417144	3604.220496	121.5632	118.4984	114.0969	53.44215196	54.14837022	54.43397754
0.853211274	0.310893513	227.1862913	5577.609302	0.817	4.14E-05	24569.57319	3.53E-05	20959.2862	1.29E-05	7636.865361	0.865555317	74.5506031	232.6280299	6167.244457	0.8705	0.022900864	23996.76335	0.000411454	21236.87266	74.31350772	5875.538886	0.838032839	0.482049316	211.6329373	5139.469145	0.7827	4.15E-05	24504.98671	3.48E-05	20492.22763	1.96E-05	12030.22588	0.846771277	76.84311406	225.5305253	5701.014908	0.8452	0.023585137	23980.03171	0.000421938	20768.43224	76.53799181	7492.815073	161.9669	155.3518	145.5971	9.102867921	13.65951817	22.81935081
0.879780948	0.234052588	606.3580946	6196.368707	0.8481	7.44E-05	28493.50725	6.99E-05	24821.32062	8.42E-06	7161.948119	0.86289069	75.28617811	580.0507885	6071.172078	0.8624	0.023147836	27824.7907	0.00044731	24333.50163	75.01148958	8409.477505	0.840232001	0.489470325	550.6122527	5174.846586	0.7835	6.99E-05	28576.303	5.95E-05	23862.17174	2.95E-05	14637.55546	0.861368944	75.30182113	584.4276766	6043.882728	0.8621	0.023156134	27832.60248	0.000447851	24300.95019	75.03759205	8076.299849	168.4661	167.5736	166.5552	24.48475956	26.26625179	27.66650598
0.866027137	0.286918815	772.2621055	5856.488075	0.8302	3.39E-05	29219.38967	2.93E-05	25300.51183	9.69E-06	8408.190195	0.853250544	76.08436841	743.7768924	5855.17108	0.8534	0.023351577	28538.82845	0.000412056	24917.59442	75.80256401	8252.133818	0.835077264	0.489039867	703.3371363	5083.350724	0.7801	3.39E-05	29219.16075	2.83E-05	24392.63305	1.65E-05	14297.75836	0.850865953	76.20774648	745.0847418	5808.297183	0.852	0.023389892	28537.68087	0.000412605	24846.45628	75.92712217	8210.660211	172.1616	170.7059	169.7153	3.205789363	3.240679742	3.564189376
0.826150428	0.376156088	772.0845053	5035.822501	0.7893	3.43E-05	28856.85823	2.84E-05	23826.48685	1.29E-05	10891.50095	0.835540671	77.77715244	762.5789726	5467.644474	0.8351	0.023862955	28178.2741	0.000420201	24101.92549	77.46366777	9066.516824	0.816306648	0.592366817	724.9204877	4683.732574	0.7546	3.43E-05	28869.65107	2.80E-05	23562.96119	2.03E-05	17109.63053	0.828191507	79.02042553	754.8171429	5283.508693	0.8225	0.024228002	28157.4045	0.000425966	23873.24086	78.65034699	10719.60255	171.3977	169.8691	167.217	3.113122983	3.274960334	3.357485815
0.857601297	0.264125832	823.4525106	5706.17435	0.8265	3.36E-05	29418.94204	2.89E-05	25226.14715	8.87E-06	7781.814156	0.846400049	76.84924861	796.6130635	5694.652349	0.8451	0.023580356	28726.52822	0.000415385	24885.85899	76.547046	8903.129807	0.839103303	0.526936891	756.5107748	5134.750898	0.7796	3.36E-05	29416.35518	2.82E-05	24675.97287	1.77E-05	15510.21511	0.844098885	77.34813668	790.1472794	5626.712585	0.8399	0.023726133	28726.90654	0.000417696	24824.13954	77.02096588	9624.201929	171.5757	171.2456	173.3322	2.983197866	3.032306159	2.970933045
0.859967135	0.26403477	822.44537	5752.993722	0.8283	3.36E-05	29411.97791	2.89E-05	25289.81449	8.87E-06	7779.939394	0.849810925	76.53706541	796.1248085	5769.535062	0.8485	0.023486011	28722.36759	0.000413956	24980.13042	76.24031639	8742.634532	0.830260522	0.577273912	738.7860308	4940.034402	0.7674	3.37E-05	29406.05877	2.80E-05	24404.0114	1.94E-05	16994.8478	0.845172832	77.21847141	786.8889813	5652.025318	0.8413	0.023686714	28722.14561	0.00041709	24850.85404	76.89279593	9576.876738	171.6015	171.1533	173.5132	2.986552821	3.017879903	2.942588276
0.878715664	0.2500592	671.0272318	6154.624911	0.8446	3.37E-05	29444.81968	2.96E-05	25857.80653	8.37E-06	7398.351291	0.870881161	73.95588738	658.745583	6303.037843	0.8773	0.02271613	28772.23424	0.000402046	25609.62035	73.73749732	6473.851704	0.858303483	0.402574895	627.6320872	5590.125279	0.8078	3.37E-05	29433.41223	2.89E-05	25241.21274	1.34E-05	11929.37311	0.866701565	74.56318934	658.5075827	6186.528722	0.8704	0.022895932	28774.8727	0.000404844	25498.88039	74.32204392	7130.659926	173.1426	171.1993	170.5075	3.978399834	4.189770818	4.43679431
0.904287544	0.190165809	138.3006289	6807.776672	0.8745	0.000191378	17897.89891	0.000174886	15907.29376	3.17E-05	3993.071584	0.907919502	70.35808097	139.7493759	7302.493976	0.9213	0.02179027	17361.68338	0.000535486	15740.04517	70.21590965	3320.138066	0.890732003	0.30211659	120.614757	6369.197943	0.8457	0.000198986	17429.61748	0.000182742	15012.65715	3.21E-05	7300.236254	0.880866272	73.0527027	140.4990991	6551.553153	0.888	0.022596552	17594.90676	0.000537905	15676.80798	72.84902181	4207.044932	128.1209	125.9929	124.9679	46.07911982	47.85293146	50.45687336
0.83646294	0.357241379	338.2734796	5217.905831	0.7975	4.39E-05	22656.03235	3.68E-05	18957.57876	1.58E-05	8048.634859	0.846852444	76.97179761	342.2278706	5694.293518	0.8439	0.023623942	22105.63918	0.000424714	19161.69696	76.65589726	7158.555516	0.843684403	0.485249237	325.415056	5241.133011	0.7864	4.40E-05	22635.53586	3.71E-05	19095.75402	2.12E-05	11029.31422	0.851573231	76.39748265	340.8468415	5807.536643	0.8501	0.023451931	22129.97988	0.000422041	19299.65915	76.0968254	6774.039289	159.3886	149.1604	132.1344	5.448833824	7.412993447	11.04265985
0.866012022	0.286334056	349.1448542	5852.822367	0.8298	4.09E-05	26564.22704	3.62E-05	22751.17531	9.98E-06	8172.440588	0.87950705	73.2715157	362.1185905	6510.753106	0.8854	0.022515482	26036.49887	0.000405641	23231.85802	73.06291667	5964.964197	0.87847774	0.332049121	351.5665784	6059.815555	0.8306	4.08E-05	26612.08933	3.65E-05	23183.44807	1.17E-05	9410.56393	0.87373099	73.63057542	370.4372943	6377.511406	0.8811	0.022624952	26119.78118	0.000406869	23217.14191	73.4194833	5917.995687	165.7348	162.6664	159.0496	16.84122528	17.62052528	18.40842578
0.833128437	0.336173412	261.8883599	5179.283173	0.7981	4.00E-05	25031.73186	3.33E-05	20857.96174	1.34E-05	8415.898634	0.848207741	76.67016881	265.7531578	5735.483296	0.8471	0.02353092	24465.63841	0.00041986	21254.37913	76.36632081	7540.521072	0.838477301	0.501921599	252.1737125	5132.429926	0.7806	3.99E-05	25063.64604	3.35E-05	21028.11117	2.02E-05	12435.87881	0.852154239	76.32024915	268.3907627	5821.919967	0.8509	0.023426057	24437.74686	0.000418355	21311.2008	76.02527911	7408.419673	164.7292	157.2148	143.9099	6.083014661	9.566758122	15.77580369
0.850584431	0.293139293	871.8572826	5545.745261	0.8177	3.35E-05	29576.48184	2.85E-05	25156.9691	9.80E-06	8675.314174	0.838699508	77.91881521	842.0238638	5507.17604	0.8339	0.02389643	28872.95383	0.000420162	24798.33901	77.57514041	10159.05216	0.815792737	0.568409931	783.2807713	4693.969625	0.7572	3.35E-05	29580.59601	2.73E-05	24135.06437	1.90E-05	16804.03817	0.830002421	78.65141612	826.0597918	5332.109417	0.8262	0.024118831	28863.46696	0.000423535	24533.65864	78.29812366	10441.78843	172.2368	171.5244	173.8484	2.734177346	2.954150409	2.878440105
0.862146781	0.261953511	865.2399133	5798.963628	0.8303	3.38E-05	29269.24172	2.91E-05	25233.04028	8.86E-06	7664.405998	0.838048304	77.61297646	822.08878	5516.300753	0.8369	0.023811233	28573.44892	0.000419034	24516.31911	77.29705931	9242.204206	0.816655303	0.575244644	768.3205501	4697.477916	0.7562	3.38E-05	29269.86829	2.76E-05	23902.56306	1.94E-05	16836.9319	0.834184299	78.33598553	811.0241109	5413.210488	0.8295	0.024023353	28566.58734	0.00042239	24401.85173	77.98663025	10222.2528	170.9731	170.6598	173.6292	2.993889843	2.897251104	2.759946985
0.856614002	0.28587049	465.7712307	5668.628964	0.8231	3.93E-05	26525.64767	3.38E-05	22666.76686	1.11E-05	7675.369457	0.861290997	75.09254975	463.5374826	6056.438686	0.8644	0.023060526	25840.32959	0.00041279	22671.58493	74.83793154	6984.54963	0.851912027	0.455322358	428.8001759	5418.082066	0.7957	4.00E-05	26339.70177	3.46E-05	22264.10468	1.64E-05	12575.11688	0.854406265	76.24864992	451.9215778	5863.877201	0.8518	0.023401215	25774.04273	0.000418369	22397.21515	75.94495105	8392.054473	163.855	162.2216	160.2865	13.36663664	14.72500232	16.18250962
0.878816842	0.240335737	346.4895378	6164.965481	0.8459	4.52E-05	25249.75482	4.06E-05	21995.42525	9.06E-06	6494.284431	0.873700205	73.97970816	340.0200638	6352.757866	0.8772	0.022730172	24649.04685	0.000413299	21823.03969	73.74590455	6383.459986	0.870335462	0.388454012	324.6154599	5841.638454	0.8176	4.57E-05	25161.32057	4.09E-05	21662.3463	1.43E-05	10547.03339	0.866478786	74.98613999	338.7403557	6154.310695	0.8658	0.023028703	24680.23343	0.00041758	21711.36671	74.71691932	7274.521252	161.3671	158.3932	152.8545	17.98711588	19.10197356	19.62647522
0.864003478	0.269596629	493.5493076	5827.686574	0.8305	3.47E-05	29201.65322	3.01E-05	25173.25665	9.04E-06	8001.406863	0.851867742	76.35496767	482.7420341	5814.873486	0.8505	0.023431885	28512.68336	0.000414135	24803.73036	76.06103277	8736.383304	0.822104741	0.567638561	446.0690833	4797.668243	0.7614	3.48E-05	29140.20502	2.89E-05	23864.79059	1.89E-05	16923.11203	0.837539098	78.00504202	469.4528211	5484.480672	0.833	0.023923515	28463.73253	0.00042187	24328.71681	77.65895507	10327.13445	171.3146	170.7082	170.4692	9.152902646	9.390178527	9.947253458
0.879807023	0.245479258	606.2019856	6182.858173	0.8461	3.43E-05	28923.82733	3.02E-05	25435.65498	8.35E-06	7147.31982	0.885787275	72.51855993	611.1030859	6684.416816	0.8944	0.022283049	28280.01923	0.000395946	25595.63294	72.32771222	5554.532424	0.87160715	0.331478345	581.8352286	5919.41834	0.8266	3.43E-05	28928.91435	2.99E-05	25206.37164	1.13E-05	9631.218727	0.870906458	74.09317196	596.5850651	6293.91071	0.8758	0.022755547	28280.25725	0.000403175	25187.61505	73.86378952	6646.371889	172.2204	169.7616	167.6813	4.064040334	4.255275013	4.88967589
0.899788505	0.208991354	447.6293948	6676.744553	0.8675	8.41E-05	11819.45487	7.58E-05	10621.86185	1.73E-05	2505.624899	0.893572192	71.37767012	455.1127505	6922.87712	0.9082	0.021993723	11566.34904	0.000435238	10553.37049	71.22870646	1781.310614	0.893419241	0.22892408	443.6243596	6502.790871	0.8588	8.41E-05	11818.69481	7.53E-05	10547.25515	1.89E-05	2753.506986	0.898220364	70.99058154	459.6231519	7047.093309	0.9131	0.021876146	11566.59917	0.000433683	10607.85984	70.84646902	1731.383857	111.0249	108.6373	104.1661	6.101924286	5.892618154	6.149578099
0.891840241	0.233586006	553.2346356	6465.455743	0.8575	0.00011752	8414.922216	0.000104768	7510.78229	2.75E-05	1951.845714	0.890797488	71.85394504	560.612367	6831.810284	0.9024	0.022167244	8228.275266	0.000466979	7496.71422	71.68652241	1397.119792	0.88993492	0.247889306	552.2143527	6401.138368	0.8528	0.000117606	8408.319418	0.000104685	7483.874878	2.91E-05	2080.971271	0.891548161	71.58745583	566.840106	6866.4428	0.9056	0.022089361	8225.560512	0.000465841	7497.493044	71.43321165	1290.137699	93.9743	91.659	85.8529	4.508108196	4.591439752	4.929002089
0.869029138	0.320019366	587.4911644	5875.532801	0.8262	7.03E-05	14045.54067	6.11E-05	12205.74222	2.24E-05	4504.925079	0.876545517	73.38461538	601.2242081	6446.742534	0.884	0.022580081	13727.27523	0.000431558	12301.92339	73.17863434	2899.893552	0.864615744	0.338289057	579.2676091	5769.845235	0.8206	7.04E-05	14044.02425	6.08E-05	12140.55371	2.37E-05	4754.997928	0.874595177	73.56310239	602.2482141	6398.091734	0.8819	0.02263369	13724.56435	0.000432309	12272.55264	73.35288917	2968.016669	120.9587	118.0625	115.7651	4.204425562	3.982711859	4.33531106
0.898230207	0.199861687	499.6113416	6648.766021	0.8676	9.96E-05	9940.665053	8.94E-05	8936.194715	2.00E-05	1973.865376	0.895417049	71.25170367	501.7199384	6969.887887	0.9098	0.021970394	9721.978677	0.000448552	8901.404984	71.1034442	1460.144427	0.896744613	0.21152511	494.8553576	6599.033326	0.8642	9.96E-05	9937.783499	8.93E-05	8914.42721	2.12E-05	2084.534251	0.900411935	70.78508245	504.3578683	7108.437589	0.9157	0.021829525	9718.612646	0.000446806	8943.887305	70.6453126	1385.471879	102.9496	98.9638	94.481	4.985123854	5.096517395	5.299456482
0.870779216	0.314196116	596.2131227	5922.368472	0.8291	7.14E-05	13838.00989	6.22E-05	12039.80777	2.23E-05	4368.516343	0.881060657	72.80983386	613.9382577	6572.402335	0.8908	0.022409219	13537.62203	0.000429921	12192.94497	72.62001797	2635.859901	0.862401351	0.323744515	590.171136	5734.494881	0.8204	7.13E-05	13850.59495	6.15E-05	11943.68042	2.31E-05	4480.390785	0.874850838	73.48232895	607.5942456	6408.536701	0.8828	0.022611643	13535.81853	0.000432797	12108.75603	73.27810693	2837.224173	120.2488	117.1264	115.2485	4.049333101	3.991894668	4.297202317
0.892247637	0.226790914	470.0057076	6479.613395	0.8585	0.000103627	9568.763425	9.24E-05	8543.285644	2.36E-05	2151.442749	0.901397429	70.7877034	483.8308398	7129.433111	0.9157	0.021833471	9352.653052	0.000450561	8614.377854	70.64531341	1360.173638	0.894231821	0.229086678	470.8347877	6522.008028	0.8595	0.000103613	9569.760908	9.26E-05	8564.442518	2.39E-05	2176.646539	0.899033134	71.0109541	481.3086866	7062.423814	0.9129	0.021900028	9360.718918	0.000451251	8607.222529	70.86199381	1415.153357	100.5962	97.3732	92.5882	5.282759275	5.290228895	5.754930126
0.880693673	0.248906232	501.1383469	6194.627527	0.8457	7.50E-05	13193.89169	6.61E-05	11614.3902	1.85E-05	3302.411966	0.882955139	72.6422491	508.0546595	6620.757616	0.8928	0.022362775	12900.24843	0.000432503	11640.09859	72.45733904	2451.502688	0.878645107	0.297646075	493.6187119	6102.174095	0.8369	7.51E-05	13185.27626	6.60E-05	11572.92918	2.22E-05	3949.320468	0.887142251	72.17987533	511.5238201	6735.403384	0.8984	0.022223885	12895.48264	0.000430595	11684.39381	72.00568968	2319.317453	117.9239	114.3787	110.742	4.678643905	4.948099262	5.047161182
0.871145583	0.294131794	552.495671	5944.727032	0.8316	7.41E-05	13352.48713	6.46E-05	11620.64421	2.16E-05	3960.069625	0.881408379	72.87102573	569.7059881	6574.715088	0.8901	0.022429452	13058.44961	0.00043268	11759.92764	72.67712915	2608.112122	0.869795498	0.310711267	547.4559836	5900.182949	0.8281	7.41E-05	13347.38522	6.46E-05	11596.49449	2.27E-05	4201.07318	0.884210415	72.57077319	573.2766029	6650.049569	0.8937	0.022339444	13051.53944	0.000431477	11784.41738	72.38437076	2522.414904	118.2191	115.1195	112.7313	4.584178791	4.478417103	4.779068979
0.878136778	0.258194774	472.1646081	6127.53848	0.842	6.66E-05	14876.38955	5.85E-05	13062.12442	1.71E-05	3849.15095	0.884736683	72.53053008	481.7725341	6663.049653	0.8942	0.022319634	14547.96913	0.000424573	13158.65	72.34389521	2776.867479	0.88329924	0.265475204	470.8764351	6233.558883	0.8449	6.66E-05	14880.89253	5.88E-05	13144.57951	1.77E-05	3943.276127	0.884333051	72.57967771	484.1139212	6651.811325	0.8936	0.022334554	14552.13048	0.00042476	13158.81454	72.39246997	2774.201992	124.4643	121.2064	119.934	5.107262037	5.007134813	5.419616592
0.89659805	0.214955435	521.9288112	6594.050122	0.8639	8.85E-05	11181.14099	7.95E-05	10015.78205	1.87E-05	2440.242621	0.902372379	70.67746156	535.0872315	7158.263112	0.9171	0.02178538	10945.67953	0.000436406	10085.65702	70.5374673	1576.218515	0.894520598	0.219461217	517.7712494	6538.584069	0.8612	8.84E-05	11191.85207	7.92E-05	10006.89487	1.93E-05	2460.296911	0.894916463	71.34976888	526.0270746	6952.343165	0.9086	0.021988349	10945.7068	0.00043907	10006.12189	71.19734995	1712.978098	109.3093	105.0743	100.6721	4.856833692	4.905606946	5.115836353
0.898799773	0.214186691	316.107902	6645.98683	0.8656	0.000116265	8755.309496	0.000104865	7856.198404	2.41E-05	1902.938309	0.900975379	70.81951273	324.8605922	7117.974325	0.9153	0.021855219	8564.160931	0.000462268	7871.244233	70.67618774	1281.604938	0.896600826	0.215477294	317.5088044	6590.023865	0.8632	0.000115909	8771.692887	0.000104003	7864.741107	2.47E-05	1894.93721	0.899103081	71.01709027	324.2366345	7064.001534	0.9128	0.021914646	8571.349693	0.000462854	7866.56081	70.86975812	1301.003615	97.0724	92.4936	87.6413	7.964794928	8.615309573	9.188788512
0.906939141	0.197439122	404.2738082	6860.864182	0.8747	9.10E-05	10941.89665	8.26E-05	9919.726062	1.79E-05	2159.843832	0.903937037	70.40684411	408.8861488	7211.985551	0.9205	0.021707714	10707.61543	0.000437484	9887.419294	70.27692651	1420.98642	0.898577535	0.221025819	395.0043997	6630.072132	0.8637	9.11E-05	10927.99942	8.20E-05	9808.274556	1.98E-05	2452.515573	0.905714861	70.25203252	411.5723577	7262.013767	0.9225	0.021660857	10706.22244	0.000436891	9903.877382	70.1245644	1397.607588	107.3374	104.2103	99.4722	6.175464455	6.342387083	6.813239109
0.881649683	0.254730369	477.9411069	6210.081126	0.8456	7.94E-05	12474.93874	7.01E-05	10990.0543	2.00E-05	3201.897233	0.890426232	71.90286094	493.301619	6820.8554	0.9018	0.022144639	12199.57008	0.000433339	11095.36893	71.73421148	2128.351519	0.885113681	0.254425301	481.6535284	6281.682086	0.8474	7.94E-05	12473.24911	7.04E-05	11031.81567	2.00E-05	3207.551806	0.888281633	72.00566352	492.2890616	6770.599778	0.9005	0.022176478	12201.94581	0.000433674	11072.09954	71.83777	2112.146918	115.1595	111.0163	107.0681	4.994282706	5.240480351	5.267586012
0.901491624	0.196922724	409.9968998	6731.149041	0.8709	9.20E-05	10809.91273	8.30E-05	9737.6134	1.78E-05	2165.795729	0.893975123	71.40422954	412.0410838	6929.101994	0.9079	0.022008649	10577.9414	0.00044239	9658.055473	71.25224428	1656.551492	0.898796051	0.208352561	407.1919705	6653.703969	0.8668	9.20E-05	10811.69312	8.27E-05	9710.554292	1.89E-05	2284.953276	0.902784299	70.60544662	416.8690632	7172.467102	0.918	0.021767502	10582.42691	0.000439197	9758.112653	70.46831312	1498.406754	107.6673	102.9637	98.6169	5.861792449	6.287987143	6.742961841
0.87588655	0.254845998	430.5264597	6083.152931	0.8409	6.87E-05	14450.33048	6.02E-05	12652.31199	1.74E-05	3694.51766	0.884023106	72.4738489	442.6935628	6653.489495	0.8948	0.022306712	14133.99553	0.000426087	12774.03501	72.29538546	2585.939204	0.875551366	0.287766339	427.0086186	6041.299976	0.8354	6.86E-05	14461.85672	6.01E-05	12664.91761	1.98E-05	4146.554824	0.882104482	72.7771544	442.8790395	6594.798923	0.8912	0.02239653	14134.50595	0.000427418	12747.37596	72.58742325	2739.819008	123.2579	119.3109	117.3894	5.533948644	5.428889499	6.067929436
0.895732177	0.201849711	546.3734104	6585.910289	0.865	8.59E-05	11506.5474	7.70E-05	10297.41202	1.71E-05	2348.668671	0.891709874	71.75564409	550.0358566	6857.427623	0.9036	0.022107039	11253.6494	0.000438531	10247.35745	71.5913154	1911.819721	0.885323214	0.24317968	535.6556914	6304.597366	0.8504	8.59E-05	11514.06573	7.61E-05	10188.48933	2.08E-05	2810.126294	0.894286089	71.49955889	550.3303926	6928.107852	0.9068	0.022029259	11264.36756	0.000437353	10294.27957	71.33867713	1863.848919	110.5866	106.751	102.1711	4.562378814	4.483592198	4.717523163
0.905484656	0.200045803	439.5617772	6823.193519	0.8733	8.77E-05	11328.53178	7.96E-05	10246.43291	1.73E-05	2291.829726	0.902235752	70.53831084	448.4514584	7165.69852	0.9188	0.021744484	11089.09088	0.00043505	10215.51611	70.40695522	1501.398563	0.901667976	0.202161914	439.2808188	6726.386385	0.8696	8.77E-05	11332.38408	7.91E-05	10211.9707	1.75E-05	2318.156279	0.906175998	70.19779029	453.5736568	7275.9987	0.9232	0.021641279	11086.94162	0.000433708	10256.23733	70.07139303	1456.212522	108.9589	106.2159	101.6493	5.881990377	5.9184869	6.139813475
0.89505622	0.221783558	351.95634	6548.338133	0.8612	0.000123331	8228.054691	0.000110745	7355.136142	2.66E-05	1839.963307	0.899069778	71.02519996	361.3330777	7062.749096	0.9127	0.021924003	8049.630437	0.000469319	7386.916943	70.877524	1226.515175	0.897220677	0.221874638	354.8199513	6600.310856	0.8631	0.000123067	8240.357317	0.000110541	7394.915449	2.69E-05	1830.826208	0.898257481	71.13826402	361.3441238	7037.332492	0.9113	0.021957387	8057.084604	0.00046959	7393.004864	70.98641141	1250.93416	94.4631	89.5651	84.1417	7.581836083	7.771020653	8.27082953
0.873100789	0.300564836	555.9407523	5979.478789	0.8321	7.38E-05	13399.33049	6.45E-05	11692.9352	2.20E-05	4059.639587	0.878064902	73.11045987	572.5232191	6494.444995	0.8872	0.022502221	13102.37139	0.000433334	11759.06234	72.91468971	2639.65656	0.869873001	0.314873035	554.9436518	5894.39081	0.827	7.38E-05	13388.59008	6.43E-05	11631.96198	2.30E-05	4262.555744	0.877579762	73.22939716	570.2298487	6477.032739	0.8858	0.022537693	13097.81497	0.000433926	11744.83026	73.02993106	2688.863965	117.7721	115.335	113.6706	4.305062321	4.335801541	4.611821293
0.870035007	0.297108434	549.9662651	5916.568675	0.83	7.19E-05	13751.29036	6.26E-05	11960.20943	2.13E-05	4094.100482	0.880261596	73.02228977	573.0837555	6542.232241	0.8883	0.022472599	13452.67139	0.00043134	12110.20124	72.82439792	2710.258021	0.869303389	0.311578438	554.6086536	5887.797438	0.8274	7.19E-05	13754.56526	6.25E-05	11956.8472	2.23E-05	4294.889654	0.878949118	72.87796382	572.0448365	6527.783234	0.8899	0.022432363	13446.27565	0.000430639	12082.37553	72.69346191	2543.813125	119.9294	116.8072	114.4108	4.249966546	4.378998534	4.861506285
0.894446182	0.206672845	576.5143652	6550.57785	0.8632	7.35E-05	13462.0782	6.58E-05	12032.41363	1.50E-05	2805.307576	0.899903428	70.99627642	589.3872522	7082.231848	0.9131	0.021865744	13174.58953	0.000424217	12111.71679	70.84646802	2032.380134	0.896515666	0.207494795	580.1663197	6597.571594	0.8646	7.35E-05	13467.51353	6.59E-05	12067.63136	1.52E-05	2801.587092	0.899250709	70.96825049	591.1346617	7070.676812	0.9134	0.021858586	13174.22695	0.000424054	12101.67024	70.82319864	1967.513795	118.0466	115.923	112.6772	4.598067903	4.528627938	4.760000017
0.898104264	0.200368919	515.7977865	6645.121513	0.8674	7.61E-05	13015.64676	6.84E-05	11680.37652	1.51E-05	2637.265391	0.902543421	70.52295974	526.0903156	7173.470511	0.919	0.021728334	12744.10403	0.000424408	11749.38358	70.39163126	1716.12753	0.892454744	0.222312798	508.4084081	6485.123908	0.8587	7.60E-05	13023.50728	6.79E-05	11618.14721	1.68E-05	2906.907302	0.900831864	70.72002182	524.3224223	7122.410147	0.9165	0.021787378	12746.8311	0.000425218	11732.82795	70.58364373	1777.04539	116.8391	113.88	109.3286	4.732421282	4.933254504	5.084193352
0.888706665	0.237492677	545.2371412	6384.03222	0.8535	8.30E-05	11914.46057	7.38E-05	10589.06896	1.97E-05	2820.016989	0.896437207	71.11563357	561.6567197	7000.86023	0.9115	0.021913362	11649.97543	0.000433164	10670.11139	70.97082933	1724.756116	0.886985696	0.252530007	542.5610732	6329.497058	0.8498	8.31E-05	11902.0586	7.38E-05	10550.91854	2.08E-05	3027.791716	0.896728672	71.23184265	559.7269531	6998.489067	0.9101	0.021946924	11653.07351	0.000433699	10680.54904	71.08000378	1809.480057	112.9739	108.1913	102.4337	4.407041955	4.716895622	4.747231226
0.917227007	0.168974446	409.1202297	7155.284589	0.8883	0.00010596	9695.268716	9.74E-05	8887.116602	1.76E-05	1641.136328	0.915123754	69.43399057	413.4219889	7533.879126	0.9332	0.021428433	9474.861444	0.000447947	8841.705616	69.32052144	1124.79072	0.91424544	0.174330584	405.1443905	7073.27206	0.8851	0.000106301	9680.675291	9.76E-05	8836.732369	1.75E-05	1724.325726	0.915342431	69.31710709	417.9016797	7547.57473	0.9347	0.021394086	9483.93399	0.000447183	8859.155065	69.20927591	1060.928319	101.0575	97.766	93.3043	8.533627233	8.725287617	8.877843292
0.879072647	0.25690575	443.8564315	6153.124244	0.8435	7.03E-05	14107.69235	6.18E-05	12390.79147	1.78E-05	3678.810196	0.883735476	72.61930355	451.9701041	6637.496921	0.8931	0.02235065	13794.49446	0.000428284	12449.44242	72.43299915	2656.823312	0.876277658	0.283000836	437.5554892	6064.284434	0.8371	7.03E-05	14111.53709	6.16E-05	12356.19479	1.96E-05	4035.727153	0.880164923	72.88155973	451.4998314	6550.409147	0.8899	0.022430715	13803.63097	0.000429256	12417.40894	72.6934618	2673.70727	122.2561	118.1121	113.9693	5.258242367	5.393026385	6.113555227
0.873633804	0.290067179	604.2483205	5998.112524	0.8336	7.10E-05	13917.3702	6.21E-05	12145.07696	2.03E-05	4093.091411	0.883597547	72.73245122	619.5209688	6626.649922	0.8918	0.022383737	13622.13691	0.00042931	12301.60972	72.53858733	2713.302198	0.878368732	0.293962941	606.239211	6095.336163	0.8365	7.09E-05	13926.17131	6.24E-05	12223.411	2.07E-05	4121.825105	0.885954056	72.44018765	620.8411706	6693.47135	0.8953	0.022296497	13626.17022	0.000428024	12338.7752	72.2550114	2586.888864	120.754	117.769	113.6712	4.098522173	3.976259423	4.036395739
0.882051679	0.255351863	478.6404494	6216.23217	0.8455	7.72E-05	12838.16487	6.82E-05	11315.16191	1.95E-05	3312.658072	0.887781466	72.03699589	487.3039662	6758.46006	0.9001	0.022184166	12558.58349	0.000431844	11391.03567	71.86969393	2168.572825	0.879069126	0.262557891	479.0391877	6143.574279	0.8421	7.73E-05	12831.65396	6.80E-05	11266.83561	2.00E-05	3414.144876	0.880756389	72.90311341	483.3081938	6559.981454	0.8897	0.02244263	12546.44768	0.000435629	11286.50587	72.70980453	2517.654827	117.1861	112.3429	106.7703	5.472902958	5.578397583	6.008888242
0.891206469	0.242661677	497.4525786	6438.549292	0.8551	7.39E-05	13409.20617	6.59E-05	11938.31558	1.77E-05	3285.776517	0.894915085	71.43411194	509.0943147	6945.966505	0.9076	0.021998204	13120.26609	0.000426417	11990.91432	71.27579385	2142.589246	0.883620209	0.259311813	491.8825825	6244.590162	0.8457	7.39E-05	13407.85349	6.54E-05	11835.69367	1.89E-05	3520.555043	0.888944257	71.93864418	506.2129147	6788.743704	0.9013	0.022151447	13119.58194	0.000428485	11912.90252	71.77400516	2226.015644	118.6782	115.3345	111.9726	5.044744271	5.07070111	5.40304074
0.905489329	0.19460016	421.7349274	6828.70461	0.8741	0.000109054	10607.1914	9.99E-05	9580.058778	1.95E-05	2097.76902	0.910930612	69.83909904	430.3107016	7407.997952	0.9279	0.021553126	10368.56655	0.000452937	9619.719133	69.71646773	1359.239142	0.912869762	0.175817955	421.3932979	7034.539907	0.8833	0.000109711	10584.66365	0.000101659	9624.826454	1.60E-05	1941.832786	0.909612541	69.92101856	431.501079	7372.762192	0.9268	0.02157857	10376.31334	0.000453221	9617.643568	69.79921279	1333.338045	106.0312	101.7364	97.0982	11.96619516	12.07026574	11.53281218
0.897203281	0.200184608	509.8155071	6623.903888	0.8667	8.29E-05	11955.8567	7.44E-05	10724.15282	1.65E-05	2396.717088	0.899664778	70.98751643	522.3088042	7077.731713	0.9132	0.021872565	11692.38918	0.00043263	10745.79369	70.8387113	1790.324025	0.900916379	0.197701149	513.1914943	6714.650575	0.87	8.29E-05	11952.5423	7.47E-05	10763.3221	1.63E-05	2372.618966	0.902486184	70.62105034	519.9729789	7164.791458	0.9178	0.021763358	11694.69427	0.000431085	10779.62645	70.48366788	1646.668228	111.7237	109.1047	104.7985	5.056991033	5.024414186	5.063526217
0.904881992	0.19382151	536.4107551	6816.057666	0.874	9.58E-05	10326.78547	8.67E-05	9349.322293	1.86E-05	1994.607666	0.902480666	70.77726826	540.9261928	7152.941042	0.9159	0.021821012	10100.82171	0.000443449	9318.198495	70.62988637	1518.212032	0.906442221	0.182989397	538.2219815	6866.635389	0.8771	9.59E-05	10320.77585	8.69E-05	9355.149048	1.75E-05	1888.405541	0.899541812	70.87949699	541.7057408	7083.221761	0.9145	0.021854293	10097.94183	0.00044376	9282.778817	70.73801246	1456.955932	105.4158	100.5391	96.44	4.768344614	4.842444753	4.954391991
0.900473504	0.201565558	612.0935881	6698.043398	0.8687	7.25E-05	13628.2277	6.54E-05	12264.06621	1.45E-05	2767.357776	0.899423346	71.00175246	621.2746988	7071.91172	0.913	0.021867218	13331.02136	0.0004234	12244.90449	70.85422744	2029.384447	0.894586301	0.21737111	605.7612634	6540.109614	0.8612	7.25E-05	13625.67836	6.50E-05	12178.79988	1.56E-05	2983.519392	0.896934297	71.23228217	618.3007362	7002.771673	0.9101	0.021936671	13329.4416	0.000424369	12209.89163	71.08000213	2094.691682	118.9567	116.3489	114.0221	4.431323178	4.188217854	4.439415681
0.893542971	0.208671458	577.5230698	6530.200093	0.8626	8.33E-05	11868.40401	7.44E-05	10608.35733	1.74E-05	2471.581846	0.8908665	71.77781468	583.5552972	6838.792981	0.9033	0.022111823	11598.43131	0.000436234	10557.24755	71.61509153	1935.885531	0.888825804	0.247801102	570.6657676	6380.383605	0.8527	8.33E-05	11869.5112	7.40E-05	10552.12693	2.07E-05	2924.419843	0.896650307	71.30620326	587.2091949	6991.443027	0.9092	0.021968858	11602.59206	0.000434335	10630.47116	71.15036488	1853.153652	112.7604	107.9074	103.6554	4.295834243	4.418396229	4.543506448
0.891520456	0.217037123	573.3188642	6472.146515	0.8593	8.07E-05	12236.81892	7.20E-05	10907.7948	1.74E-05	2663.878855	0.893294714	71.56937852	578.9379622	6903.015013	0.9059	0.022046093	11966.19031	0.000433108	10921.19565	71.40955031	1962.144166	0.887196857	0.243192488	566.9821596	6347.452347	0.852	8.07E-05	12242.04977	7.16E-05	10861.72585	1.97E-05	2967.13662	0.895085682	71.43345086	582.2025121	6949.738872	0.9076	0.022004901	11973.96397	0.000432492	10955.34201	71.275795	1926.938409	114.1585	109.9013	105.0607	4.172047189	4.432218216	4.457512256
0.910252867	0.184132757	408.0300068	6959.092976	0.8798	0.000103589	10688.66072	9.50E-05	9709.99529	1.87E-05	1986.570812	0.908958169	70.01512532	414.5190147	7350.972774	0.9256	0.021601436	10443.63796	0.000448711	9671.73314	69.88970457	1392.016638	0.916686949	0.168336899	407.1220583	7142.780655	0.8881	0.000104497	10661.81748	9.69E-05	9739.34771	1.51E-05	1874.165522	0.911395814	69.77764617	418.6028858	7422.931948	0.9287	0.021529589	10452.77862	0.000447662	9709.345335	69.65641262	1324.300635	105.9217	102.4601	98.1393	11.03430873	11.42604078	11.08564367
0.91452502	0.174291201	425.3013668	7080.202756	0.8853	0.000116684	10721.53857	0.000108817	9781.412553	1.59E-05	1925.103016	0.907286058	70.25897019	427.9365854	7295.880867	0.9225	0.021685673	10485.28932	0.00046186	9690.302444	70.12456493	1493.121518	0.909985299	0.181828507	420.7851221	6957.787507	0.8805	0.000117295	10688.61317	0.000109336	9678.873588	1.59E-05	2055.328677	0.905903103	70.36727825	424.980241	7257.244925	0.9211	0.021718426	10483.14917	0.000462191	9672.086472	70.231149	1512.099555	106.2134	102.5256	97.9482	11.81919035	11.82590989	11.55838729
0.904261144	0.18778591	491.9094236	6807.021729	0.8744	7.65E-05	12960.92017	6.92E-05	11709.07675	1.41E-05	2467.298033	0.905076659	70.34614132	498.7351568	7241.203842	0.9213	0.021674659	12691.72343	0.000424074	11731.87459	70.21590046	1698.589602	0.895524237	0.217260179	483.7832038	6562.989328	0.8621	7.64E-05	12968.00487	6.85E-05	11606.11805	1.65E-05	2833.618374	0.901612138	70.62536777	496.9335295	7145.962406	0.9177	0.021759373	12693.03454	0.000425179	11690.97581	70.49134721	1744.602593	116.3902	113.707	109.1338	4.992749139	5.215529791	5.286974329
0.898279641	0.200322729	629.0419548	6649.615952	0.8676	8.61E-05	11470.92312	7.73E-05	10300.48001	1.72E-05	2303.299908	0.898344499	71.09914455	637.3491994	7041.498136	0.9118	0.021909082	11228.28943	0.000435835	10310.47198	70.94747959	1737.848212	0.89528044	0.229893073	626.2942817	6546.899117	0.8604	8.60E-05	11474.90667	7.70E-05	10272.89405	1.97E-05	2640.299861	0.898087353	71.11167179	636.3361123	7035.908513	0.9116	0.021913853	11230.49923	0.000435868	10310.79377	70.96304484	1698.359149	110.3403	106.6913	101.5427	4.026946226	4.010536661	4.148008764
0.888343877	0.221443588	604.0831581	6395.543798	0.8562	7.21E-05	13707.80881	6.41E-05	12169.02517	1.59E-05	3049.128475	0.899208363	70.9439641	621.0444347	7071.445442	0.9137	0.021850081	13413.37244	0.000422682	12321.61656	70.79994463	1986.51275	0.8918063	0.233695018	606.9087621	6462.434838	0.8571	7.21E-05	13708.11971	6.43E-05	12217.65258	1.67E-05	3220.065453	0.888233514	72.15700456	610.8161789	6758.789474	0.8987	0.022213573	13408.25704	0.000427873	12169.23956	71.98165273	2410.736286	119.4569	116.8399	113.5583	4.139775645	4.182041127	4.33859437
0.883110963	0.254545455	544.9319953	6243.978512	0.847	9.22E-05	10733.38654	8.15E-05	9474.475747	2.34E-05	2737.453719	0.886956148	72.17764915	561.0654497	6732.044969	0.8984	0.022240592	10501.55855	0.000445658	9522.245631	72.0056926	1846.150601	0.881194395	0.253932584	545.7299823	6201.800237	0.8455	9.22E-05	10730.78167	8.13E-05	9449.166372	2.33E-05	2731.511295	0.890165482	71.88580931	560.1323725	6816.731264	0.902	0.022152226	10500.72228	0.000444543	9554.798719	71.71830804	1804.103326	107.8735	102.5813	95.8301	4.660761499	4.827752097	5.309541787
0.861165672	0.328942554	725.4868886	5712.577022	0.8199	9.22E-05	10675.56836	7.94E-05	9194.434302	3.03E-05	3509.107208	0.870413523	73.80227531	747.4327645	6305.429807	0.879	0.022729539	10431.17691	0.000452295	9283.937833	73.59489965	2214.930375	0.847214194	0.395622264	705.7997498	5374.469919	0.7995	9.22E-05	10676.13183	7.81E-05	9045.562285	3.65E-05	4217.529831	0.867853786	74.3401306	739.2277466	6222.222362	0.8729	0.022887691	10434.54565	0.000454589	9265.154177	74.10919764	2459.947989	111.962	102.9674	81.547	3.034823883	3.350512982	3.706722407
0.877235916	0.280791701	690.5137713	6090.533802	0.8387	0.000100023	9846.292357	8.78E-05	8630.27557	2.78E-05	2788.870395	0.873564064	73.67408585	693.6286623	6371.37747	0.8806	0.022695955	9627.674199	0.000458695	8595.795055	73.46118401	2106.460481	0.868606999	0.306512021	682.920261	5878.709798	0.8277	9.99E-05	9854.458983	8.68E-05	8557.011951	3.06E-05	3022.828924	0.87998934	72.89121151	699.5176444	6546.299168	0.8898	0.02246235	9627.80535	0.000455529	8656.634631	72.7016371	1884.347719	107.8285	98.9666	78.0195	3.543005469	3.461428093	3.874083085
0.876453339	0.294413207	690.1336284	6059.167723	0.8359	9.98E-05	9871.35722	8.75E-05	8646.408074	2.92E-05	2921.443594	0.874178434	73.57910854	699.4303051	6389.318249	0.8817	0.022667534	9652.18487	0.00045806	8626.425873	73.36953425	2075.893161	0.872703039	0.305237809	688.941481	5962.817941	0.8305	9.98E-05	9871.638772	8.71E-05	8609.603525	3.03E-05	3025.744491	0.878835742	73.11429216	701.8453562	6508.592426	0.8872	0.02252766	9651.045086	0.00045627	8668.780059	72.91469513	1983.80275	107.9142	99.1889	78.0159	3.59566939	3.495427984	3.834663895
0.839622086	0.433565548	636.5450285	5205.034452	0.7895	8.05E-05	12252.90956	6.76E-05	10285.93956	3.48E-05	5318.280431	0.846448316	76.71860602	654.4277614	5704.289073	0.8465	0.023587174	11959.31294	0.000454437	10355.81253	76.42046096	3670.105729	0.827654136	0.487735605	622.8430158	4951.435321	0.7746	8.05E-05	12246.88045	6.67E-05	10128.0601	3.91E-05	5988.664472	0.846856927	76.60901369	654.6857008	5717.489854	0.8476	0.023556626	11965.98584	0.000453902	10371.03246	76.32128312	3532.251888	119.9275	110.4329	87.1811	3.657163347	3.35575589	4.032704154
0.853744049	0.353580247	686.3037037	5536.82716	0.81	9.31E-05	10579.02358	7.96E-05	9025.491265	3.27E-05	3761.712099	0.863674551	74.72550374	706.8717329	6122.498906	0.8685	0.023004022	10338.45769	0.000456903	9130.19022	74.48465094	2564.406218	0.846952909	0.41706399	677.3984944	5354.668758	0.797	9.31E-05	10582.40251	7.89E-05	8959.781864	3.86E-05	4432.151694	0.868247369	74.25163062	709.542625	6235.289965	0.8739	0.022862441	10341.26994	0.000454987	9180.649355	74.02439452	2417.233665	111.3249	102.7915	80.0881	3.2060786	3.363811491	3.708657222
0.859490506	0.341585979	760.385709	5660.696041	0.8159	8.91E-05	11044.99424	7.66E-05	9491.484067	3.04E-05	3774.717	0.860407757	75.17023741	770.3067748	6036.037406	0.8635	0.023132823	10790.61737	0.000455353	9497.755846	74.91594618	2812.508975	0.839833716	0.444444444	738.9523085	5200.98072	0.7884	8.91E-05	11043.68316	7.49E-05	9271.327184	3.96E-05	4909.043379	0.860466527	75.11410716	774.8585812	6040.772249	0.8641	0.023116846	10787.59866	0.000455132	9493.635508	74.86392684	2773.150793	113.1019	105.5764	81.5225	2.997118014	3.015321383	3.481536119
0.839762956	0.416340447	776.232984	5222.879278	0.7919	8.52E-05	11561.04344	7.16E-05	9703.393678	3.51E-05	4852.776739	0.860716613	75.12523148	812.0377315	6044.393519	0.864	0.023115566	11299.91817	0.00045172	9947.439662	74.87259083	2935.760301	0.834166072	0.51057246	756.1291903	5042.740588	0.7756	8.52E-05	11557.76135	7.11E-05	9632.70706	4.32E-05	5942.70771	0.852257084	76.11793669	799.3856975	5836.720516	0.853	0.023412572	11294.79121	0.000455902	9846.725671	75.83812452	3250.31524	116.578	107.3052	84.3834	3.10001871	2.827057297	3.346820049
0.8594894	0.350913774	720.3840304	5656.886913	0.8153	9.44E-05	10427.33055	8.12E-05	8962.403028	3.31E-05	3659.39789	0.871801729	73.88942034	743.1008997	6324.275481	0.8781	0.022754864	10190.25168	0.00045469	9085.561765	73.67033155	2285.764378	0.845022981	0.396514981	701.5967156	5332.190422	0.7977	9.45E-05	10423.56174	7.99E-05	8806.143861	3.73E-05	4142.737495	0.867919628	74.3599175	735.2846339	6222.038845	0.8727	0.022895049	10192.35992	0.000456576	9051.037962	74.12618226	2433.868225	110.3073	102.0312	80.22	3.19513172	3.238244364	3.738823344
0.866498246	0.309910346	724.2209838	5830.514417	0.8254	9.49E-05	10373.13048	8.23E-05	8985.806788	2.93E-05	3221.773443	0.871327979	73.96602827	737.7667579	6310.430005	0.8772	0.022778569	10139.47515	0.000455439	9034.778808	73.74591686	2287.535454	0.85633642	0.381093789	707.9084385	5563.327147	0.8082	9.49E-05	10380.55048	8.12E-05	8891.227733	3.62E-05	3944.14922	0.872739204	73.76011824	740.5557071	6350.297408	0.8796	0.022716656	10142.1445	0.000454521	9053.078192	73.5446998	2237.724648	110.0279	101.7466	80.103	3.320439969	3.201810182	3.742885384
0.839474129	0.410932963	840.6659513	5219.828683	0.7921	8.60E-05	11439.27812	7.23E-05	9598.711679	3.52E-05	4710.805959	0.85682387	75.6981462	879.9010143	5940.130698	0.8577	0.023285594	11175.96129	0.000454914	9797.036655	75.42254899	3160.48665	0.840573405	0.433967047	835.6400507	5214.20583	0.789	8.60E-05	11439.95425	7.23E-05	9612.617018	3.72E-05	4976.904816	0.856710486	75.3664654	871.814445	5960.390618	0.8612	0.023191319	11176.16047	0.000453379	9793.400408	75.11602241	2870.955411	116.3621	106.6493	83.7254	2.853310987	2.691562652	2.978152924
0.867500452	0.314140559	688.5076811	5854.852183	0.8267	9.18E-05	10729.87081	7.97E-05	9302.77928	2.87E-05	3385.760131	0.867796302	74.28563251	695.2236978	6224.966571	0.8735	0.022871627	10487.90567	0.000454004	9307.505286	74.05829206	2453.072582	0.853843193	0.374690441	670.9591382	5522.590391	0.8076	9.18E-05	10728.42298	7.85E-05	9154.524957	3.42E-05	4042.588534	0.868143692	74.08918579	697.3706749	6244.864565	0.8757	0.022814371	10491.80952	0.000453063	9315.252842	73.87223637	2332.027749	112.4985	103.3358	80.7706	3.380916703	3.465954177	4.138934119
0.836981189	0.406143345	712.4058905	5180.039312	0.7911	8.58E-05	11482.3236	7.19E-05	9606.492939	3.48E-05	4675.081406	0.85270513	76.02599532	733.8264637	5850.059485	0.854	0.023385965	11213.16838	0.000456115	9779.979724	75.74932108	3186.147892	0.838547233	0.422419253	701.810893	5189.826852	0.7895	8.59E-05	11473.46498	7.21E-05	9610.663497	3.60E-05	4876.975427	0.856550943	75.5560987	741.1056797	5945.167598	0.8592	0.023244957	11213.60091	0.000454142	9822.169132	75.29087459	3060.269088	115.3351	107.6323	82.8327	3.546661527	3.328677922	3.979285201
0.863997251	0.343261719	750.9655762	5750.958008	0.8192	9.23E-05	10662.86353	7.98E-05	9210.891709	3.15E-05	3673.734009	0.867827786	74.18774297	769.9924537	6232.28493	0.8746	0.02284346	10422.57958	0.000453954	9250.787638	73.96514742	2376.302538	0.853642493	0.380114059	741.5281428	5513.275725	0.8066	9.23E-05	10664.36672	7.88E-05	9103.606325	3.49E-05	4071.578106	0.864420948	74.63565267	765.7004025	6141.569293	0.8695	0.022976894	10422.3847	0.000455812	9216.565779	74.39898673	2526.423002	111.8852	103.483	79.1348	3.075844756	3.134311886	3.812273463
0.847732867	0.405134627	782.8226675	5375.66124	0.7985	8.72E-05	11289.85861	7.39E-05	9567.581981	3.52E-05	4588.99474	0.854727707	75.60027952	809.3631493	5911.673888	0.8586	0.023262409	11031.03622	0.000455324	9646.564638	75.34348843	2905.815863	0.840777722	0.403804964	777.7065642	5247.80131	0.7937	8.72E-05	11291.82915	7.33E-05	9490.982151	3.51E-05	4563.861409	0.857748625	75.49005698	812.2557274	5969.410048	0.8599	0.023227372	11031.33434	0.000455007	9680.839376	75.22958421	2948.84661	115.2615	106.1631	82.5821	3.00814191	2.842234753	3.382463539
0.849301112	0.357461577	691.4122459	5452.362172	0.8068	8.97E-05	10982.78173	7.62E-05	9323.37779	3.20E-05	3929.509916	0.867164541	74.47486803	720.9912784	6200.723893	0.8714	0.022924442	10735.972	0.000452982	9523.042718	74.23676682	2614.517902	0.849989668	0.378529668	696.1108347	5442.875606	0.8039	8.97E-05	10987.31783	7.62E-05	9340.366702	3.39E-05	4162.73131	0.864315506	74.74271565	720.8774617	6132.450881	0.8683	0.023005926	10739.79454	0.000454004	9499.114277	74.50180676	2637.730623	113.5407	104.3993	83.0417	3.188846737	3.540714548	3.710897615
0.8560828	0.381170358	574.6328096	5560.147841	0.8083	9.48E-05	10450.83385	8.12E-05	8946.481395	3.60E-05	3995.772857	0.869880542	74.23152597	600.6051247	6265.969343	0.8742	0.02285632	10210.90311	0.000456511	9083.001252	73.99899242	2438.555136	0.854823114	0.355626851	577.0051826	5555.205084	0.8104	9.49E-05	10434.76579	8.13E-05	8907.455503	3.33E-05	3752.49383	0.865053411	74.46201515	598.1186596	6164.469589	0.8714	0.022929481	10207.39901	0.0004573	9027.606049	74.23676672	2363.068281	110.9416	102.2784	77.9338	4.786688776	4.956863266	5.833148169
0.85111959	0.371386028	737.3327956	5472.648095	0.8059	8.99E-05	10952.7089	7.66E-05	9316.35068	3.33E-05	4071.739794	0.870240679	74.03537198	767.4370151	6285.938841	0.8764	0.022794377	10703.89833	0.000451336	9523.356066	73.813233	2444.717138	0.851358009	0.37369727	737.373201	5476.742432	0.806	8.98E-05	10958.94628	7.65E-05	9330.461567	3.36E-05	4095.194665	0.865089653	74.51837391	764.8086817	6161.237942	0.8708	0.022940378	10703.12747	0.000453253	9468.9401	74.28791679	2536.938907	113.5713	104.2497	82.5669	3.11604177	3.121369877	3.446407461
0.860682587	0.341084323	613.6540203	5686.53592	0.8171	9.67E-05	10193.92694	8.33E-05	8771.429805	3.29E-05	3484.225554	0.873593075	73.78371617	639.7753013	6364.17421	0.8794	0.022723609	9964.131681	0.000456322	8900.92125	73.56142693	2271.32272	0.857227486	0.359675037	614.3365337	5603.990153	0.8124	9.68E-05	10188.93045	8.30E-05	8728.610694	3.46E-05	3683.205933	0.871985782	74.02555327	637.9336071	6318.184349	0.8766	0.022795908	9961.246977	0.000457395	8881.102271	73.79639441	2343.585786	109.2968	100.7569	79.1058	3.676888598	3.902614814	4.222180285
0.848547891	0.4015	789.5625	5397.196	0.8	8.50E-05	11578.68788	7.22E-05	9820.361334	3.39E-05	4679.661625	0.852795564	75.92316688	808.894983	5858.540872	0.8551	0.02335515	11313.61279	0.000454871	9871.476868	75.65187652	3157.115776	0.842299837	0.459184969	773.3785705	5230.016885	0.7877	8.51E-05	11574.26228	7.17E-05	9740.719244	3.87E-05	5354.376539	0.857165895	75.49639451	811.6657362	5959.120493	0.8598	0.023227951	11314.53024	0.000453169	9919.830276	75.23833309	2997.383926	116.5719	107.517	83.9875	3.027677392	2.86005437	3.471821388
0.851922303	0.368068478	677.4056569	5484.687632	0.8061	8.64E-05	11413.09949	7.36E-05	9719.96175	3.17E-05	4208.773353	0.860203766	75.17836461	700.0908038	6031.96896	0.8634	0.023132817	11149.79152	0.000453035	9810.191299	74.92462224	2905.601459	0.843525991	0.454683544	666.2108861	5261.747848	0.79	8.64E-05	11408.09861	7.30E-05	9617.852132	3.90E-05	5216.078481	0.854437719	75.76041545	689.9497024	5896.258957	0.8569	0.023307621	11149.88143	0.000455385	9747.768604	75.49296269	3059.291049	115.3278	106.9406	83.3289	3.46371869	3.681232353	4.279664098
0.861061934	0.330969556	752.6239149	5697.535518	0.8179	0.000191119	5127.788238	0.000164679	4413.397182	6.32E-05	1694.960264	0.871141559	74.04735821	772.2294876	6301.404199	0.8763	0.022895801	5014.014265	0.000539502	4468.129386	73.82167956	1154.451558	0.864918838	0.327002678	753.5444363	5779.78768	0.8214	0.000190975	5131.979304	0.000165122	4441.606053	6.24E-05	1676.114926	0.875164091	73.47638464	780.1813342	6414.660211	0.8829	0.022726049	5015.471967	0.000537429	4490.044597	73.26983221	1056.846528	70.4819	71.1847	76.3679	3.551516914	3.203683179	3.121497972
0.85763003	0.347425341	854.5649502	5618.386752	0.8137	0.000189773	5154.04031	0.000162757	4420.980601	6.60E-05	1784.629102	0.867786492	74.31539166	876.9553367	6222.695373	0.8732	0.022975183	5037.034356	0.000539058	4472.712974	74.08375904	1191.390861	0.860762326	0.333414873	854.6078767	5691.17001	0.8176	0.000189789	5154.024095	0.000163347	4437.95854	6.32E-05	1716.456458	0.865574278	74.65171383	871.2500575	6160.707844	0.8694	0.02307481	5035.587992	0.00054031	4460.462067	74.40756864	1259.379457	70.784	71.3852	76.1078	3.06452998	2.792028109	2.972806613
0.865329543	0.304495335	289.6237732	5811.62135	0.8253	0.000390571	4455.477766	0.000345295	3831.291458	0.000109359	1409.592269	0.884180504	72.51006261	303.5527728	6653.822227	0.8944	0.022626051	4363.305009	0.000707813	3927.875062	72.32777266	854.5537791	0.880633885	0.272489912	287.7502967	6172.809399	0.8426	0.00040515	4420.328982	0.000372743	3845.534982	6.60E-05	1334.693686	0.886349364	72.28525248	299.5185598	6712.516888	0.8971	0.02257493	4334.64441	0.000733495	3888.964183	72.110063	856.8589901	65.3228	64.9977	68.1883	13.21746572	14.52153211	15.66053777
0.866099233	0.32629279	744.4935664	5813.747026	0.8238	0.000189291	5180.752246	0.000164054	4485.088662	6.13E-05	1699.864652	0.877759587	73.17802347	762.2351083	6483.994359	0.8864	0.022635538	5061.335853	0.000535312	4538.421677	72.98051982	1031.605483	0.869025831	0.304200869	741.3862868	5889.897634	0.8284	0.000189334	5180.215355	0.000164677	4499.443229	5.72E-05	1582.1521	0.882449477	72.65718127	775.1196505	6609.998207	0.8926	0.022479445	5066.658302	0.00053333	4570.407786	72.47359495	953.9713197	70.2315	71.8559	76.9414	3.81831216	3.274314461	3.129307598
0.858081658	0.341921237	848.016317	5634.3245	0.8151	0.000188505	5194.121212	0.000161853	4455.702538	6.43E-05	1775.310391	0.871374165	74.0494123	874.3356157	6305.424284	0.8763	0.022893302	5077.00833	0.000537335	4524.92379	73.82167918	1184.799612	0.859271668	0.344286415	844.9668955	5655.666994	0.8156	0.000188537	5193.245341	0.000162122	4460.517112	6.47E-05	1789.024767	0.869824944	74.21317475	869.8565874	6266.223239	0.8744	0.02294268	5075.901532	0.000537922	4515.544438	73.98208815	1203.655535	70.6538	71.768	77.0339	3.116399454	2.999429279	3.126747638
0.861350621	0.331297337	829.4485707	5706.465917	0.8186	0.000190844	5126.827266	0.000164341	4417.981363	6.33E-05	1693.62839	0.871963929	73.88157595	851.2026873	6327.767251	0.8782	0.022846575	5008.947734	0.000538756	4467.540982	73.66196407	1122.516169	0.866226502	0.300278147	833.6365945	5836.398718	0.8269	0.000190958	5123.881243	0.000165453	4438.364632	5.72E-05	1538.49486	0.870450276	74.06152266	853.3695925	6287.930487	0.8761	0.022900905	5007.768634	0.00053938	4458.828879	73.83853123	1143.609748	70.0412	71.2563	76.9622	3.098306402	2.913521977	2.977913894
0.861226722	0.339858087	848.6209934	5696.787619	0.8174	0.000193441	5056.517862	0.00016667	4353.85775	6.56E-05	1718.502569	0.86963124	73.97993158	870.3281642	6278.926112	0.877	0.022879987	4943.257697	0.000540974	4397.032709	73.76275581	1096.095211	0.857507551	0.35851378	836.3378445	5611.148376	0.8128	0.000193331	5059.654651	0.000165782	4339.80816	6.95E-05	1805.640994	0.869406536	74.26550698	866.295491	6255.104372	0.8738	0.022963027	4944.075532	0.00054222	4398.100061	74.03289008	1173.223049	69.967	70.7622	75.5312	3.115045907	2.845531789	3.079030133
0.858244451	0.331862745	679.3230392	5642.67598	0.816	0.000220149	5269.065319	0.000190296	4513.648399	6.75E-05	1773.951103	0.870165775	74.19711868	693.5451635	6273.431969	0.8746	0.022967683	5152.677796	0.000566322	4580.072611	73.96517792	1238.321061	0.863893124	0.334309062	669.1795341	5754.235517	0.8199	0.000223205	5266.671179	0.000196459	4540.212313	6.34E-05	1793.527381	0.875754169	73.65682824	692.0820752	6413.02225	0.8809	0.022808482	5146.911227	0.000570008	4599.195632	73.43618565	1189.717221	70.8918	72.2352	76.5982	6.718295376	7.188760739	7.917749476
0.872726818	0.292832273	254.6215632	5978.854724	0.8329	0.000938655	3754.190779	0.000748586	3287.890861	0.000611571	1044.857606	0.897994104	71.1230938	265.0897422	7032.379704	0.9115	0.022825923	3634.592101	0.001246057	3321.205668	70.97110879	583.5691717	0.894719214	0.232739551	250.7007801	6527.407731	0.8589	0.001073157	3678.453138	0.000968966	3250.867844	0.000270957	948.3308883	0.897168161	71.3075231	258.5061593	7002.391113	0.9092	0.022920455	3603.548284	0.001300885	3267.78128	71.15053756	646.2572591	58.9051	57.9583	59.7562	17.04799971	18.02558074	19.08181756
0.864387546	0.328385448	819.4572332	5774.718944	0.8219	0.000185693	5275.753133	0.000160517	4561.624557	6.09E-05	1730.485582	0.876069145	73.44605457	848.1479678	6433.493377	0.8833	0.022710705	5155.187252	0.000532898	4617.841641	73.23665156	1103.153062	0.854737698	0.348946136	801.274621	5560.051152	0.8113	0.000185661	5276.671022	0.000158696	4511.425513	6.49E-05	1833.48675	0.872905404	73.79435851	836.3287079	6351.010464	0.8792	0.022815645	5158.001934	0.000533863	4606.903327	73.57817945	1134.804709	71.2824	72.3291	77.2851	3.221994761	3.061665101	3.222362175
0.875818514	0.302241937	279.055389	6036.897614	0.8341	0.000703479	4005.897374	0.000615045	3492.374753	0.000225497	1265.497542	0.892896205	71.7187258	294.9668178	6884.139918	0.9041	0.022700244	3918.74859	0.000988429	3562.047942	71.55183034	707.091804	0.887493413	0.244893167	277.3221413	6351.333177	0.8518	0.000724113	3957.032285	0.000652314	3461.534536	0.000142761	1101.646631	0.899014971	71.08377193	291.8767544	7057.062281	0.912	0.022532257	3882.521053	0.001025285	3526.396758	70.93198376	696.4485746	60.4791	60.1635	63.0136	17.72365547	19.26610411	20.84115676
0.853330856	0.3490438	823.5436151	5534.106231	0.8105	0.000191462	5119.917458	0.000163497	4368.152337	6.63E-05	1795.878347	0.867341487	74.55703619	844.2271109	6198.326364	0.8705	0.023047488	5003.16703	0.000541721	4437.806782	74.3135443	1250.087766	0.861260474	0.348256881	828.0209174	5697.952661	0.8175	0.000191341	5122.930642	0.000164839	4413.023173	6.65E-05	1782.182875	0.872783436	73.83964948	853.6229657	6345.623193	0.8787	0.022834077	5007.419256	0.000539063	4470.98757	73.62004877	1122.733811	70.0715	71.2514	76.6933	3.253088955	3.189827274	3.26543031
0.853688934	0.352084875	894.8739206	5540.584259	0.8106	0.000189997	5144.971009	0.000162266	4391.299404	6.68E-05	1810.997163	0.870028264	74.14213894	926.8850548	6274.718007	0.8752	0.022923352	5027.588323	0.000538916	4473.34071	73.91446264	1174.5008	0.860676842	0.326495726	902.442735	5699.076435	0.819	0.000189986	5145.370696	0.000163554	4428.403577	6.19E-05	1681.486447	0.864738379	74.6844649	915.0729574	6143.756041	0.869	0.0230856	5025.453049	0.000540684	4443.47706	74.44181809	1250.656962	70.3035	71.4586	76.5388	2.939691778	2.628095516	2.710367975
0.863048202	0.322867226	752.6607034	5752.891201	0.8217	0.000190757	5137.158695	0.000164776	4430.798013	6.13E-05	1663.919192	0.87762146	73.34482759	778.3933296	6469.662295	0.8845	0.02268504	5021.902318	0.000537123	4505.095634	73.13729194	1073.173205	0.863624669	0.320350536	751.7597371	5760.968841	0.8216	0.000190644	5140.217746	0.000164692	4438.89763	6.09E-05	1647.709834	0.874373381	73.83490727	771.9739447	6374.800432	0.8789	0.022828361	5021.290818	0.000538842	4488.828819	73.6032978	1199.236773	70.3877	71.6375	74.9272	3.401703795	3.187521569	3.538601441
0.869687203	0.301725178	790.8243455	5903.800097	0.8289	0.000187012	5238.741465	0.000162697	4555.597939	5.60E-05	1590.142237	0.868703509	74.18074768	796.7510003	6248.353607	0.8747	0.022933419	5119.700583	0.000536309	4547.79001	73.95671248	1178.760947	0.859124745	0.353294883	780.9163087	5648.475518	0.8149	0.000186921	5241.241379	0.000160621	4502.95026	6.60E-05	1849.911523	0.871131589	73.98517674	801.1021665	6305.477765	0.877	0.022873726	5121.02862	0.000535736	4561.757865	73.76275524	1167.110148	70.3459	72.3143	77.8564	3.53197582	3.078654822	2.976302915
0.878209344	0.273008692	270.7490177	6114.724015	0.8399	0.000651365	3851.009882	0.000561804	3369.190525	0.000257362	1058.468865	0.901279743	70.86226498	282.1832094	7121.264101	0.9148	0.022433917	3733.369152	0.000998673	3404.823186	70.71486921	637.8706821	0.891593551	0.232205368	265.6875146	6458.113419	0.857	0.000714535	3790.425088	0.000665634	3325.473782	9.35E-05	1010.366744	0.895494275	71.3524103	278.922298	6963.952234	0.9086	0.022572819	3730.447502	0.000980713	3378.90186	71.19741938	672.4094211	59.846	59.5794	61.599	15.48240563	17.10392632	18.08796282
0.861928464	0.331379016	700.1530475	5716.026505	0.8187	0.000203866	4811.965799	0.000175763	4147.627658	6.74E-05	1595.720655	0.880327356	72.99639883	731.8930903	6545.349539	0.8886	0.022594199	4701.413572	0.000547607	4229.944648	72.79983717	951.4278641	0.865956691	0.322083283	699.8707054	5810.862571	0.8237	0.000203952	4810.378779	0.000176716	4164.517896	6.54E-05	1552.133422	0.871645848	73.84429775	721.1497837	6324.597997	0.8786	0.022849019	4700.9827	0.000550002	4189.26781	73.62842984	1041.596062	69.5798	68.7387	71.3164	3.523042997	3.499231674	3.714362804
0.854850426	0.361135102	857.071314	5556.424553	0.8105	0.000193126	5064.177915	0.000165131	4329.247305	6.95E-05	1832.799877	0.871470709	73.98050393	887.6852126	6311.882454	0.8771	0.02287715	4949.242846	0.000541088	4411.192636	73.75434751	1146.293467	0.859180169	0.343788287	862.645185	5658.050478	0.8162	0.00019308	5065.248346	0.000165876	4353.331745	6.62E-05	1743.718696	0.867769733	74.44000918	882.3349392	6213.891718	0.8718	0.023014989	4950.228263	0.000542536	4395.042656	74.20272993	1199.196719	69.5428	70.8835	76.5076	3.100543204	2.788535054	2.802666987
0.87454964	0.302029542	767.4503423	6007.150114	0.8327	0.000199735	4906.254473	0.000174873	4287.076673	5.97E-05	1494.56539	0.872539321	73.89192575	774.2679649	6337.575789	0.8781	0.02285782	4794.262499	0.000546855	4273.986869	73.67035456	1098.525908	0.85828298	0.332761578	751.3379074	5644.632688	0.8162	0.000199688	4907.634771	0.000171557	4209.296776	6.59E-05	1641.534918	0.878753906	73.28261606	784.9957077	6495.105727	0.8853	0.022673393	4798.871908	0.000544831	4310.25701	73.07120422	1042.235626	67.6883	70.0771	75.9596	3.516893958	3.221731769	3.077818682
0.862196865	0.319195612	684.7350396	5731.802681	0.8205	0.000179966	5466.174162	0.000155367	4707.748787	5.68E-05	1761.28897	0.871393087	73.99532444	697.7788801	6309.499487	0.8769	0.022869295	5347.830311	0.000529592	4764.419596	73.77116571	1228.24005	0.858857653	0.349368021	677.4346546	5644.550865	0.8149	0.000179668	5475.758866	0.000154307	4703.961449	6.28E-05	1906.607436	0.869417554	74.21271729	702.2607502	6258.875572	0.8744	0.02293414	5346.934241	0.000530275	4752.421899	73.98208628	1262.206542	71.8949	73.9368	79.0137	4.212938878	4.006769991	3.830654293
0.860322189	0.328690127	743.0667155	5689.723607	0.8184	0.000210331	4672.10936	0.000181127	4017.823906	6.88E-05	1537.589687	0.875369127	73.58523307	767.0721334	6410.757968	0.8817	0.022775693	4564.748327	0.000555167	4083.732704	73.36955835	1013.235001	0.861925178	0.313458262	738.3441227	5736.731321	0.8218	0.00021049	4669.805914	0.000181685	4022.257812	6.52E-05	1472.610124	0.872283069	73.84215318	760.8859679	6336.229771	0.8787	0.022852717	4565.74963	0.000555742	4071.952954	73.62005301	1043.902242	68.7127	67.5816	70.7005	3.683932506	3.641035765	3.959318092
0.872476752	0.289865514	455.7915466	5974.085255	0.8328	0.000383105	3841.259486	0.000342511	3316.777509	8.65E-05	1207.520533	0.893186474	71.85628809	473.9606648	6879.978393	0.9025	0.022425463	3765.941053	0.000714526	3410.377659	71.67860791	744.9990028	0.878899486	0.282069623	458.737959	6119.146876	0.8388	0.000383717	3855.036004	0.00034546	3364.154737	8.13E-05	1158.062232	0.884157986	72.79553361	479.1274829	6633.093817	0.8911	0.022698491	3784.839524	0.000700518	3409.64675	72.59562278	809.8259455	62.0686	60.6526	62.6921	10.82849454	11.68248746	12.47266201
0.875387635	0.275680841	525.980172	6050.365026	0.8372	0.000240191	4139.081581	0.000210756	3617.431427	6.43E-05	1167.237697	0.888296302	72.13325918	546.6344828	6761.562625	0.899	0.022370313	4052.168743	0.000577105	3675.988646	71.95766076	737.6593993	0.882100699	0.260715131	529.8479754	6211.189202	0.8446	0.000239856	4145.288539	0.000211877	3654.11707	6.15E-05	1089.475255	0.891729087	71.75785746	549.1549358	6857.348606	0.9036	0.022257772	4050.413236	0.000576263	3686.892862	71.5913403	703.6625719	64.4957	63.5629	66.9688	4.800331396	5.148071832	4.994920075
0.875968202	0.285167464	592.1607656	6052.179904	0.836	0.000484084	3351.270694	0.00044339	2899.971675	8.55E-05	1050.003469	0.881884622	73.0146314	607.365785	6573.478334	0.8885	0.022864311	3288.766798	0.000803625	2939.331046	72.80805351	756.8323016	0.860510496	0.348689047	588.2494487	5678.077187	0.8162	0.000463118	3381.860083	0.000402034	2895.780224	0.000141827	1218.464592	0.877506028	73.52124646	602.6707082	6455.356034	0.8825	0.023006936	3292.669348	0.000787511	2932.4942	73.30308099	792.9270255	56.7734	57.2059	58.976	10.38015667	11.27300781	11.6923404
0.845026797	0.408365783	745.5707826	5321.846627	0.7961	0.000278863	3508.235398	0.0002357	2964.807958	0.000113856	1429.210024	0.859648798	75.1686161	774.7547192	6023.333526	0.8635	0.023318461	3423.891372	0.000618821	3009.061651	74.91599362	889.0521135	0.85537754	0.348275862	759.3246305	5574.120197	0.812	0.000279072	3505.797291	0.000238864	2997.918414	9.64E-05	1226.313916	0.865721266	74.78522871	779.3223874	6154.33149	0.8679	0.023201623	3425.111764	0.000618459	3032.586341	74.5361905	878.4765526	59.447	58.7504	60.3814	3.163983407	3.382262533	3.903195363
0.849013858	0.372124829	832.8361308	5431.39438	0.8043	0.000232853	4196.879523	0.000197659	3564.578011	8.63E-05	1566.342658	0.864193993	74.85584131	853.3021566	6122.601891	0.8671	0.023177604	4100.552647	0.000578287	3626.21413	74.60494809	1053.941414	0.85850451	0.346177445	836.5994601	5639.262363	0.8149	0.000232763	4199.188121	0.000199748	3607.638532	8.06E-05	1449.882685	0.864875792	74.81994236	854.105245	6137.044035	0.8675	0.023167018	4100.873429	0.00057827	3629.355757	74.57054782	1046.860519	64.0903	64.347	68.2522	3.170259597	2.968802957	2.980032745
0.854777743	0.356145769	639.1536751	5548.600247	0.8095	0.000228216	4310.842989	0.000195051	3685.71826	8.12E-05	1535.31748	0.866257978	74.71773915	661.9508461	6168.23587	0.8687	0.023130649	4215.146886	0.000573786	3738.314018	74.46753733	1074.097847	0.855581696	0.355944746	641.9459793	5569.321411	0.8108	0.000228235	4311.74815	0.000195257	3690.682696	8.11E-05	1532.447089	0.865871705	74.61669349	663.2506323	6168.355944	0.8698	0.023101991	4209.569211	0.000573703	3727.760504	74.37335932	1054.392734	66.3576	64.8961	66.67	3.831386464	3.941561212	4.561501946
0.853229337	0.354918438	493.448344	5524.113198	0.8092	0.000310329	3823.752966	0.000263454	3261.078791	0.000114871	1361.207365	0.879357419	73.32888788	507.3105787	6503.407776	0.8848	0.022801744	3714.495592	0.00065241	3323.300221	73.11251272	868.721745	0.882426543	0.277105575	491.5288256	6205.922657	0.843	0.000323226	3783.332503	0.000292791	3309.544065	6.89E-05	1131.400949	0.883300725	72.83314619	506.4006288	6614.304289	0.8906	0.02265764	3708.688861	0.000655332	3327.501232	72.63636264	799.4403773	60.9038	60.8308	63.452	8.742582316	9.410683894	10.21542442
0.856961672	0.362079586	674.3950967	5595.341998	0.8117	0.000248451	4028.732167	0.00021393	3445.491492	8.68E-05	1483.116546	0.862955829	74.8162536	696.0423055	6104.029625	0.8675	0.023181859	3938.609107	0.000591624	3472.283536	74.57054877	1008.674121	0.860238246	0.347389066	675.3380731	5671.325815	0.8158	0.000247904	4032.04327	0.00021379	3464.885525	8.37E-05	1421.483329	0.874971587	73.52884506	705.3595149	6407.425479	0.8823	0.0227971	3941.06075	0.000588227	3521.495187	73.3196694	855.7192565	63.524	62.9494	65.2217	4.348128793	4.856216597	5.06665068
0.852568326	0.366790582	326.9219331	5500.148947	0.807	0.000523011	3111.042503	0.000443583	2641.652956	0.000208848	1176.708055	0.880588645	72.99819941	344.7051542	6550.081251	0.8886	0.022930597	3026.963763	0.000863997	2703.727812	72.79987246	664.1495611	0.875198142	0.288484558	328.0100551	6035.421594	0.8354	0.000548197	3083.90304	0.000492919	2669.909345	0.000116918	978.5684702	0.881767483	72.77648115	341.9277379	6588.324731	0.8912	0.02286608	3016.044659	0.000865193	2689.329668	72.58748061	652.1062612	55.6936	54.1314	54.1028	11.70900162	12.35889696	12.83365233
0.874158547	0.286210615	548.6324428	6013.893255	0.8347	0.0005408	3256.323829	0.000496954	2802.00186	9.37E-05	1048.560321	0.882422356	72.95411606	570.3974359	6588.306568	0.8892	0.022894544	3204.57861	0.000844866	2863.240415	72.7507478	733.7837382	0.859108392	0.361288736	556.9867191	5637.315544	0.8132	0.000497708	3313.599484	0.000417256	2843.26069	0.000185668	1201.181136	0.876082995	73.40896232	563.8308249	6436.440534	0.8837	0.023032756	3201.093131	0.000842096	2836.884429	73.20353808	742.9795179	56.3407	56.2125	57.4306	11.16087915	12.04951218	12.35760428
0.85319676	0.348400642	731.4349759	5526.754724	0.8097	0.000209056	4695.154131	0.000178656	4001.550297	7.21E-05	1644.744103	0.864987119	74.58234686	756.7579589	6155.054017	0.8701	0.023075075	4590.530744	0.000556606	4060.273129	74.34770983	1106.330996	0.85706843	0.322158326	741.5921938	5634.603083	0.8173	0.000208826	4699.35238	0.000179062	4027.22984	6.69E-05	1517.19283	0.876261859	73.46336768	771.4350583	6435.910429	0.8831	0.022738477	4591.243121	0.000553416	4112.437402	73.25324236	994.2903408	68.5863	67.8276	71.5319	3.499107359	3.550672928	3.777642438
0.863169152	0.323256948	659.345685	5746.131643	0.8204	0.000221147	4456.513042	0.000191256	3842.119712	7.04E-05	1453.615188	0.873037462	73.82352941	679.3568096	6351.316532	0.8789	0.022857919	4357.950734	0.000565155	3887.830225	73.60330222	987.0892024	0.866846451	0.313468992	663.6971899	5837.382752	0.8256	0.000221094	4457.00436	0.000191983	3859.497097	6.83E-05	1411.916909	0.875961856	73.24074074	685.5794941	6446.14318	0.8856	0.022686564	4360.500565	0.000562817	3904.199324	73.04645173	870.3652891	67.4639	65.8908	68.8101	3.989548444	4.10198432	4.14982385
0.852133056	0.376752264	842.7030145	5487.885746	0.8061	0.000207114	4719.294753	0.000176519	4021.709518	7.78E-05	1778.953232	0.865791675	74.55129236	877.2922458	6171.384607	0.8705	0.023062795	4611.538082	0.000554893	4084.483068	74.31354715	1121.843308	0.853102728	0.356091528	848.4087817	5517.647372	0.8085	0.000207105	4719.1812	0.000176716	4025.823509	7.37E-05	1679.597403	0.866756003	74.57531886	872.9921866	6186.625187	0.8703	0.023067985	4613.025394	0.000555073	4091.588342	74.33062632	1152.944387	68.4966	68.0345	72.2306	3.030377607	2.788495966	2.880837316
0.856058811	0.359654534	376.3066009	5574.155089	0.8105	0.000435484	3218.008513	0.000376509	2746.098795	0.000148505	1187.466502	0.87696868	73.3593803	391.4846771	6456.4382	0.8843	0.022936066	3132.210336	0.000765555	2790.054675	73.15386444	704.6096347	0.876533964	0.295737548	374.7720307	6056.10249	0.8352	0.000445783	3189.752155	0.000400316	2768.01743	9.74E-05	1030.850455	0.883187614	72.6607663	391.9576518	6623.900515	0.8926	0.022727759	3124.734596	0.000766173	2796.800165	72.47362181	656.5787587	56.6979	55.3894	55.6337	10.36768227	11.07590934	11.56457195
0.847908816	0.39588272	841.4706176	5397.292202	0.8015	0.000246437	3961.804367	0.000209131	3357.54518	9.68E-05	1576.461385	0.858735809	75.2809093	866.9798191	6000.060775	0.8622	0.023321218	3870.807585	0.000590927	3399.454447	75.02894134	1001.538274	0.851024062	0.372251894	842.3297727	5465.499565	0.8051	0.000246111	3966.984598	0.000209409	3377.512145	9.19E-05	1468.67681	0.863201873	74.96927697	868.1353661	6097.703627	0.8658	0.023225052	3874.777085	0.000590079	3423.198913	74.7169713	998.5659506	62.8191	62.5731	64.7877	2.981572604	2.833982426	3.127143858
0.848465491	0.381415047	706.5261584	5414.048331	0.8028	0.000254861	3840.948181	0.000216172	3260.836232	9.80E-05	1448.573866	0.862952105	74.72112838	735.3905584	6110.253195	0.8685	0.023162157	3751.843984	0.000596333	3313.996893	74.48468918	902.2411054	0.85725284	0.344064881	715.0172032	5613.498894	0.8138	0.00025504	3838.244286	0.000218581	3292.057154	8.76E-05	1319.79737	0.866637239	74.44269818	736.0489847	6193.619938	0.8717	0.023078276	3749.108982	0.000596201	3323.688821	74.21125538	888.6171848	62.7651	61.2185	62.7427	3.293739818	3.335469645	3.900627733
0.844392716	0.427277302	862.2302466	5304.643936	0.7948	0.000279763	3483.845118	0.000236386	2940.656314	0.000118929	1492.427655	0.85821293	75.31677883	896.9108842	5988.881179	0.8618	0.0233645	3403.344395	0.000619531	2987.841018	75.06377419	885.6957531	0.849425229	0.362891207	876.6706408	5443.023348	0.8052	0.000279715	3484.167909	0.000237691	2959.087768	0.000100991	1268.424988	0.856755721	75.52425829	893.3397324	5950.401513	0.8595	0.023426188	3404.305992	0.00062002	2984.343422	75.26464478	905.9895288	57.8294	58.9714	62.0367	3.11988712	2.683874446	3.007349848
0.857380172	0.347515986	723.9269552	5611.281604	0.8132	0.000207277	4731.143261	0.000177785	4056.242924	7.16E-05	1648.939867	0.865839984	74.50424799	748.1446613	6175.370608	0.871	0.023049846	4623.022044	0.000554906	4093.948939	74.27088623	1106.639495	0.864640712	0.333008645	731.5459637	5774.819554	0.8213	0.000207514	4726.005723	0.000179681	4082.132485	6.83E-05	1587.555704	0.874375835	73.51677244	759.4392566	6397.31845	0.8824	0.022754812	4622.552357	0.000551947	4131.397355	73.3113523	976.6287398	68.5197	68.2139	71.7774	3.390576929	3.415632707	3.74644488
0.866223456	0.321198884	729.0813008	5817.839947	0.8241	0.000222103	4450.19949	0.000192877	3849.928091	6.99E-05	1444.135542	0.876679614	73.48227432	748.8799411	6442.45226	0.8829	0.022756215	4352.091856	0.000565062	3898.569761	73.26983895	956.8175331	0.86829682	0.301920986	730.6943337	5873.907092	0.8277	0.00022192	4452.351335	0.000193044	3862.391015	6.59E-05	1355.61979	0.879308346	73.2101343	753.8220291	6511.026182	0.8861	0.022674809	4353.487078	0.000564304	3911.533704	73.00523601	920.2880036	66.5488	66.0961	69.7507	4.058179217	4.152958559	4.326979259
0.860437412	0.33986288	846.2118022	5681.009549	0.8168	4.11E-05	24069.85529	3.54E-05	20701.82733	1.39E-05	8204.743389	0.875061119	73.51903898	873.5500907	6409.82185	0.8824	0.022592271	23529.24207	0.000406499	21048.58779	73.31131856	5018.446963	0.876249155	0.277651832	866.1163346	6070.353299	0.8381	4.11E-05	24070.42787	3.60E-05	21083.32841	1.14E-05	6706.402816	0.871210601	74.07351598	866.4401826	6300.916895	0.876	0.022757035	23521.16541	0.000409059	20949.63573	73.84692706	5481.088242	148.4402	156.1664	167.9998	4.24276136	3.132428936	3.858626694
0.87058793	0.304808967	703.8246354	5923.313125	0.8297	4.19E-05	23611.7058	3.65E-05	20539.73124	1.27E-05	7235.030011	0.884553381	72.66614385	728.7483755	6650.063858	0.8926	0.022335365	23092.4078	0.000403378	20873.78232	72.4735684	4574.021846	0.883167466	0.244722255	724.6461847	6251.139167	0.8479	4.19E-05	23611.59936	3.70E-05	20836.77748	1.02E-05	5816.982899	0.885113682	72.38408304	736.1360643	6681.089072	0.8959	0.022253249	23093.39804	0.000402055	20884.87835	72.20661527	4215.169773	147.6859	154.4207	165.9153	4.920065161	3.841836997	4.34273254
0.858443951	0.355948869	823.9953294	5630.012291	0.8136	4.12E-05	24001.4501	3.54E-05	20588.04694	1.46E-05	8596.942232	0.87689024	73.502549	856.656735	6444.878328	0.8827	0.022584712	23469.39436	0.000406549	21035.71886	73.28640287	5216.889317	0.872960734	0.278955564	845.7162534	5995.882261	0.8349	4.12E-05	24007.67828	3.60E-05	20943.79715	1.14E-05	6724.305426	0.877584766	73.36526066	857.64503	6467.343549	0.8843	0.022543921	23471.31901	0.000405904	21054.0687	73.15380262	5103.737646	149.0946	155.7234	166.9614	4.059119466	3.285284225	3.884933724
0.875470951	0.279244832	528.1970367	6049.763293	0.8369	4.74E-05	21553.43924	4.17E-05	18835.96185	1.28E-05	6109.95794	0.892470587	71.78556404	545.1680505	6870.417691	0.9033	0.02207681	21051.9524	0.000404604	19151.69832	71.61508567	3788.417469	0.89826348	0.211602912	538.81856	6634.383566	0.8653	4.75E-05	21527.28372	4.29E-05	19285.38941	9.52E-06	4682.924882	0.887254147	72.1794301	540.34439	6737.715494	0.8984	0.022196861	21064.4301	0.000406167	19063.36257	72.00568467	3836.096282	141.3023	147.0803	158.3099	10.31128094	10.59261308	11.8573126
0.875258725	0.269951091	737.6486938	6055.607658	0.8383	4.27E-05	23133.68257	3.75E-05	20229.63575	1.14E-05	6292.468567	0.877333888	73.06285907	747.7804438	6484.290075	0.8877	0.022459254	22624.71252	0.000405848	20284.3619	72.87361399	4401.62983	0.887022897	0.235984049	747.4904996	6348.597936	0.8526	4.28E-05	23129.96997	3.80E-05	20495.32998	9.99E-06	5506.356439	0.882949045	72.58321209	756.1794068	6624.814885	0.8935	0.022313744	22626.57112	0.000403701	20412.40533	72.40056735	4253.377057	146.0978	152.8561	164.6564	4.875965049	3.698809645	4.265880805
0.879465222	0.266555898	394.3987657	6153.38761	0.8426	6.37E-05	20249.22359	5.71E-05	17691.55518	1.41E-05	5743.133753	0.896947878	71.20935852	406.5632689	7004.351494	0.9104	0.021921071	19738.99319	0.000417739	17921.48226	71.05657576	3438.883238	0.902960276	0.214359682	389.8928777	6747.188931	0.8691	6.46E-05	20062.30399	6.00E-05	17861.42919	9.73E-06	4926.931653	0.897477117	71.16092206	403.509989	7019.068935	0.911	0.021906967	19692.79111	0.000418032	17855.47495	71.00977628	3464.897695	134.6517	141.4746	152.1358	25.03988792	25.42570658	27.19898819
0.875197102	0.293188076	707.544475	6034.573566	0.8353	4.26E-05	23199.32659	3.73E-05	20288.61585	1.24E-05	6853.621453	0.883492444	72.63780939	723.4739612	6631.276403	0.8929	0.022328628	22674.79147	0.000403915	20458.89228	72.44921839	4421.056109	0.887172375	0.236922355	722.8123387	6351.145907	0.8526	4.26E-05	23195.23962	3.79E-05	20558.29564	1.00E-05	5540.647197	0.885964915	72.2790905	728.3555506	6705.078466	0.8972	0.022221799	22687.58449	0.000402234	20533.30928	72.10199144	4139.679113	146.0739	153.2171	164.5503	4.907284258	3.98049841	4.62561022
0.871310986	0.287411496	735.0357614	5958.930877	0.8333	4.25E-05	23257.42482	3.71E-05	20249.11554	1.21E-05	6728.414137	0.882189878	72.79506173	752.6024691	6595.164085	0.891	0.022376029	22735.61392	0.00040452	20489.8433	72.60371176	4489.120763	0.880072148	0.264245014	744.9959639	6162.470323	0.8424	4.25E-05	23248.60387	3.75E-05	20439.86946	1.11E-05	6203.215456	0.882758848	72.76172313	755.1296836	6608.607359	0.8914	0.022365998	22740.63619	0.000404363	20511.60237	72.57113211	4466.33195	146.6898	153.0984	165.2074	4.778553752	3.715712239	4.260279949
0.884384459	0.26024808	330.4341406	6262.751447	0.8465	6.12E-05	19855.27549	5.51E-05	17415.42553	1.34E-05	5531.363969	0.894629472	71.45784195	342.9825857	6938.390279	0.9073	0.02199296	19416.17679	0.000415985	17601.80795	71.29935755	3443.007936	0.904649275	0.202200825	333.870243	6801.011921	0.8724	6.17E-05	19772.52442	5.71E-05	17678.40913	9.38E-06	4463.695323	0.900126594	70.93937404	340.2346246	7091.187568	0.9138	0.021837154	19402.56249	0.000414107	17681.80008	70.79219346	3228.94408	134.9248	140.2753	150.5566	22.13002813	22.71979555	23.49513133
0.871246914	0.287447447	739.9813814	5952.264144	0.8325	4.29E-05	23021.40108	3.74E-05	20044.14667	1.23E-05	6649.756396	0.87917179	73.1662531	759.1784345	6511.42928	0.8866	0.022487284	22503.45872	0.000406582	20216.84477	72.96402848	4686.449244	0.876220171	0.264800476	748.9480643	6079.346158	0.8395	4.30E-05	23016.00179	3.77E-05	20152.00316	1.13E-05	6142.908279	0.878299794	73.0942078	757.7135452	6499.990534	0.8874	0.022467038	22510.36703	0.000406194	20206.86234	72.89825043	4532.891255	145.6683	152.4778	164.2325	4.671346177	3.665911505	4.338046075
0.885008949	0.276560464	479.9811678	6259.321923	0.8443	5.73E-05	21163.01196	5.19E-05	18574.34035	1.26E-05	6286.18998	0.889151023	71.95771834	506.0782377	6791.306514	0.9011	0.022139192	20818.97792	0.000413388	18856.20322	71.78993173	3733.772944	0.89712137	0.219647822	493.4807692	6599.313948	0.8632	5.73E-05	21181.15952	5.27E-05	18854.44049	9.76E-06	5002.176205	0.895223399	71.5537409	498.4672258	6943.528139	0.9062	0.022015699	20736.66122	0.00041302	18842.39463	71.38590449	3841.894725	139.237	145.6254	155.8352	19.83482369	20.11076018	21.74362529
0.865244306	0.314799077	733.4841569	5799.727935	0.8237	4.18E-05	23672.21986	3.62E-05	20470.00849	1.31E-05	7500.338473	0.881551638	72.77558348	761.1521544	6584.264811	0.8912	0.022370272	23151.80633	0.000403722	20859.11941	72.58741805	4475.342123	0.878062953	0.25661407	750.7598766	6132.376913	0.8429	4.18E-05	23673.00463	3.67E-05	20773.15419	1.07E-05	6109.231819	0.876681473	73.33167533	755.7730047	6453.018992	0.8846	0.022536872	23143.73672	0.000406267	20737.36733	73.12899327	4824.418946	147.2727	154.7875	166.8549	4.481889636	3.65477	4.240076177
0.873778881	0.278774827	733.5290739	6014.922948	0.8358	4.42E-05	22373.75987	3.86E-05	19537.26563	1.22E-05	6274.04726	0.883779449	72.64516129	752.0280018	6636.567204	0.8928	0.022332638	21875.08479	0.000405321	19752.3563	72.45733351	4231.837926	0.881733963	0.243683589	740.7749705	6220.856434	0.847	4.42E-05	22373.45419	3.90E-05	19714.70281	1.07E-05	5485.604132	0.886355201	72.32017397	753.3325527	6710.018178	0.8967	0.022235701	21876.30356	0.000403844	19809.19851	72.14219582	4013.82759	143.8116	150.1804	162.0504	5.030855339	3.790310784	4.516974634
0.892190666	0.235259778	273.0987741	6465.8	0.8565	6.68E-05	19356.06585	6.06E-05	17131.50036	1.28E-05	4945.029305	0.904825435	70.42605672	282.6533739	7229.894708	0.9203	0.021688783	18905.51125	0.000416919	17306.79653	70.29219403	2921.081387	0.916307541	0.163308948	275.425211	7137.870456	0.8885	6.74E-05	19240.13258	6.33E-05	17397.68636	7.75E-06	3636.404952	0.90800909	70.05112961	285.0633445	7327.419414	0.9251	0.021576199	18942.47519	0.000414608	17427.86469	69.9274738	2677.629229	131.6064	138.5018	147.0204	25.7638056	26.399731	27.46812305
0.870853046	0.301927711	760.8101205	5929.619518	0.83	4.25E-05	23248.17036	3.71E-05	20230.04845	1.27E-05	7071.115422	0.879810926	72.9439946	785.5494827	6539.112461	0.8892	0.022421254	22734.45726	0.00040517	20438.72995	72.75068293	4519.27193	0.875913819	0.268653159	773.2166865	6070.953993	0.839	4.26E-05	23246.90095	3.73E-05	20345.35949	1.13E-05	6296.410131	0.874229062	73.50056651	777.4126445	6395.765239	0.8826	0.022588605	22728.40109	0.000407688	20305.73463	73.29470618	4817.273283	145.6922	153.6972	164.6986	4.779378533	3.769205773	4.433594257
0.877663184	0.294778349	550.853507	6085.711913	0.8369	4.61E-05	22675.71227	4.09E-05	19817.73802	1.25E-05	6924.687179	0.885388042	72.48720241	569.3587795	6679.238292	0.8947	0.022286983	22209.34425	0.000406398	20046.96277	72.30346148	4301.282218	0.886252205	0.244914756	557.3136978	6321.322869	0.8505	4.60E-05	22678.43692	4.12E-05	20014.33387	1.03E-05	5759.15873	0.888164153	72.2010688	570.6706747	6754.042307	0.8982	0.022200313	22196.45725	0.000405094	20084.94898	72.02171769	4220.407482	143.7599	151.5423	163.1155	12.04964116	12.33351575	12.92330297
0.860714676	0.347463857	829.9703504	5681.252634	0.8162	4.11E-05	24040.58858	3.54E-05	20676.12823	1.42E-05	8406.073266	0.874637574	73.67817397	861.7042925	6390.846468	0.8806	0.022638411	23504.76561	0.000407286	21013.52548	73.46117171	5245.365206	0.870612261	0.290749429	847.2194154	5934.357633	0.8313	4.11E-05	24043.55395	3.58E-05	20917.36675	1.19E-05	7027.890533	0.875080198	73.71043962	862.3411337	6396.645575	0.8803	0.02264611	23505.95342	0.000407426	21027.2396	73.48620705	5422.2406	149.2562	155.7732	167.2054	4.11496799	3.309012203	4.012182802
0.875495909	0.296540165	466.9128457	6039.363462	0.8353	5.29E-05	21467.0747	4.71E-05	18649.94096	1.34E-05	6791.627439	0.893575884	71.59717314	487.3250883	6906.453622	0.9056	0.022026079	20997.20119	0.000409076	19028.63189	71.43320052	3826.781913	0.896792742	0.213103368	472.2330131	6598.023035	0.8639	5.31E-05	21400.82961	4.86E-05	18990.75068	9.15E-06	5005.940039	0.894649712	71.58291013	482.0061824	6929.882535	0.9058	0.022021286	20967.31022	0.000409141	19003.71507	71.4174281	3902.999669	139.7186	146.725	158.2878	19.09831443	19.77052288	20.7856482
0.866028725	0.336333779	774.4042087	5801.368568	0.8221	4.13E-05	23955.06471	3.58E-05	20733.59928	1.38E-05	8100.198516	0.877733475	73.08157746	803.1298028	6490.355493	0.8875	0.022462882	23423.3911	0.000404664	21013.47609	72.89003603	4612.025127	0.875694593	0.248782805	795.6911293	6088.296521	0.8421	4.13E-05	23954.513	3.62E-05	20963.19612	1.02E-05	5994.825436	0.873583812	73.48691515	800.7419282	6384.945621	0.8827	0.022584803	23423.14354	0.00040649	20917.35739	73.28640226	4819.149994	148.9943	155.3647	167.3783	4.373793263	3.516119155	4.292736786
0.875163567	0.279244832	654.1057474	6044.797586	0.8369	4.42E-05	22403.42144	3.87E-05	19594.07354	1.23E-05	6282.076473	0.883309203	72.65273888	666.7665509	6626.797468	0.8927	0.022335099	21900.33785	0.000405312	19762.83621	72.46545013	4224.001344	0.889747238	0.248123827	664.5715291	6397.652205	0.8528	4.42E-05	22403.20075	3.93E-05	19922.38065	1.09E-05	5593.502814	0.88786489	72.23279127	674.5357541	6746.004901	0.8978	0.022208466	21907.09133	0.000403417	19872.21237	72.05380602	4035.08131	143.8616	150.2468	162.238	5.193423287	3.989697953	4.689472891
0.882753296	0.259907725	253.9196735	6226.875311	0.8453	0.000255009	4253.818526	0.000226521	3737.099466	6.16E-05	1162.386963	0.893022998	71.66114058	265.5895225	6890.772104	0.9048	0.022242894	4163.468612	0.000590002	3783.93732	71.49639156	741.7622679	0.883194789	0.261738616	255.5710231	6235.663749	0.8455	0.00025449	4259.135068	0.000225921	3746.221797	6.32E-05	1157.864459	0.895415873	71.2607453	266.6689018	6969.086402	0.9097	0.022124558	4165.183907	0.000588909	3794.9841	71.1112805	671.0129713	65.6892	64.3456	63.608	8.713587284	10.36573011	12.42611508
0.861829758	0.338628865	714.9296102	5711.765489	0.8183	0.000193001	5124.206159	0.000166858	4408.059357	6.38E-05	1760.325186	0.870160315	74.08928979	741.90934	6280.748344	0.8758	0.022910362	5013.124001	0.000541179	4458.019002	73.86382439	1168.473396	0.861783007	0.342794226	716.155126	5705.237338	0.8174	0.00019259	5132.348177	0.000166192	4420.825939	6.54E-05	1765.475165	0.877007868	73.343697	749.9885811	6458.169927	0.8845	0.022687052	5011.736461	0.000539088	4488.401268	73.13729163	1071.906501	70.51	71.5796	74.0132	4.046640582	4.324148915	4.677459327
0.856354744	0.353614977	1020.958616	5587.933859	0.8119	0.000184767	5286.497106	0.0001583	4525.830248	6.51E-05	1872.063431	0.861860543	75.03005433	1033.979078	6070.405618	0.8651	0.023183659	5164.422148	0.000537244	4552.61691	74.77741321	1340.831233	0.851767424	0.356108429	1011.841441	5494.449189	0.8079	0.000184696	5288.643768	0.000157341	4504.966847	6.57E-05	1881.614804	0.863434351	74.89660743	1041.465267	6106.635126	0.8666	0.023143731	5168.008078	0.000536704	4565.970807	74.6479804	1312.358989	70.7925	72.9799	76.2465	2.846444054	2.279714015	2.398945133
0.870419259	0.294641782	604.4516556	5926.161469	0.8305	0.000199233	4959.46767	0.000173725	4311.865131	5.79E-05	1473.307285	0.884032753	72.58724119	629.3838836	6645.406715	0.8935	0.022466677	4849.545159	0.000542175	4378.826391	72.40059622	935.9803022	0.881753053	0.261250592	612.644955	6203.978209	0.8444	0.00019937	4955.56928	0.000176178	4362.313227	5.10E-05	1315.49325	0.883263897	72.65318696	624.8102386	6625.832755	0.8927	0.022486827	4845.583735	0.000542655	4369.008163	72.46547839	948.7368657	70.29	70.1061	71.6423	4.324569343	4.413506858	4.983307206
0.848915514	0.387281796	379.5174564	5414.865087	0.802	0.003722779	392.5915212	0.003114553	337.0758421	0.00164546	137.8245636	0.873983095	73.62029051	402.7013164	6382.917612	0.8812	0.026240874	381.2956196	0.003608198	342.8991078	73.41204915	74.73513391	0.863802588	0.309347271	387.7669868	5770.951866	0.8227	0.003713574	392.0469187	0.003156745	341.9797489	0.001377481	108.837851	0.881188063	72.87820225	404.7982022	6570.035506	0.89	0.026014103	381.411236	0.003615845	345.9809255	72.68609919	69.47696629	21.0785	18.2538	15.1292	6.024644201	6.143580842	6.038452398
0.843958944	0.413185707	523.3990941	5298.537494	0.7948	0.004892102	247.4115501	0.004101028	209.9661544	0.002068976	98.32159034	0.863348644	74.74706289	552.7675651	6115.252016	0.8682	0.027700422	241.4699378	0.004571414	214.4064216	74.51156951	56.38389772	0.851874033	0.373975664	530.0243357	5479.57189	0.8054	0.004877796	248.2123169	0.004117468	213.2160464	0.001907853	87.33933449	0.874269526	73.58802178	559.758167	6390.34029	0.8816	0.027363622	241.2346869	0.004641194	216.328352	73.37891296	49.72436479	17.563	14.5657	11.5297	4.649777522	4.156763586	3.534277566
0.87447984	0.297601918	594.3302158	6014.297842	0.834	0.000183676	5386.895444	0.000161033	4700.806047	5.32E-05	1635.876619	0.882156408	72.74450426	618.9405563	6597.993719	0.8916	0.022498716	5273.439435	0.000528694	4750.381175	72.55487949	1035.340624	0.86760376	0.299529156	594.7457443	5867.03646	0.8283	0.00018345	5392.234456	0.000159414	4672.250618	5.40E-05	1637.337076	0.881691603	72.92490163	610.8889264	6576.318494	0.8895	0.022551456	5272.82968	0.000529532	4748.072745	72.72617397	1088.68724	71.9052	73.4158	76.9249	4.449720549	4.656942168	5.3799684
0.883972623	0.258209308	246.1556815	6256.243326	0.8466	0.000267721	4079.551146	0.000238297	3586.548207	6.35E-05	1119.929246	0.893796241	71.62255606	257.4383077	6909.282116	0.9053	0.022242902	3994.174417	0.000601172	3631.426029	71.45690605	721.3500497	0.883561732	0.264577173	247.0785334	6241.89107	0.8455	0.000267231	4083.608161	0.000237549	3589.788403	6.64E-05	1133.745713	0.898708892	71.00898236	258.7826706	7055.950597	0.9129	0.022060006	3998.465878	0.000599651	3655.935071	70.86201451	634.9028371	64.5899	62.9456	61.8814	8.86964024	10.42152775	12.38743452
0.770260183	0.897877223	566.4348824	3837.031268	0.6972	0.025827785	71.95883534	0.018685089	59.30819495	0.031525942	39.8369191	0.806094767	82.50190114	624.5067174	4782.265653	0.789	0.050646694	68.90798479	0.020331499	60.12600257	82.00835739	21.93586819	0.771453664	0.890909091	571.4062992	3858.115247	0.6985	0.025991712	71.43937008	0.019056134	58.60505716	0.031202232	40.89935576	0.806367662	82.38041002	627.9979752	4793.151607	0.7902	0.050604379	68.77853708	0.020404133	59.83287798	81.88450517	21.2614528	8.1887	6.9834	5.721	4.537740882	3.64408074	2.816195838
0.856020668	0.351158206	486.2824051	5580.694431	0.8116	0.00333205	356.944554	0.002848811	306.7891724	0.001194318	120.1786594	0.875873468	73.48799275	509.8081106	6426.997734	0.8828	0.025811142	347.3138876	0.003300177	311.3836442	73.27878175	73.5386271	0.865997178	0.315214754	495.2596457	5814.83305	0.8242	0.003326025	355.9022082	0.002871402	308.6115892	0.001083663	108.6534822	0.877082974	73.19341007	511.6000903	6470.255473	0.8862	0.025717262	348.2444144	0.003291495	313.2386542	72.9976106	67.71563981	21.1665	17.6495	13.7124	5.153385077	4.674874303	3.822052621
0.903007498	0.206575468	171.849293	6753.801012	0.8699	0.001335725	2025.369123	0.001091539	1832.480204	0.000741614	390.2548569	0.913441206	69.64266523	178.1084363	7479.171521	0.9305	0.02277735	1970.320258	0.00158733	1835.646226	69.52207181	244.0282644	0.894535429	0.240004663	166.8631542	6517.041497	0.8579	0.001419414	2015.779228	0.001198954	1801.570732	0.000580845	478.1082877	0.909977653	70.03479576	177.0218284	7372.432246	0.9254	0.022887314	1970.955046	0.001568158	1829.133682	69.90521891	256.3962611	45.2405	41.5482	38.2534	14.96274239	15.3869905	15.25360903
0.870909216	0.313133752	373.9406084	5920.034042	0.8284	0.000258971	3967.79732	0.000225768	3453.035345	8.04E-05	1244.762554	0.875671816	73.45289855	381.4802989	6425.657835	0.8832	0.022785269	3874.602015	0.000597896	3464.500308	73.24495779	835.045856	0.859193629	0.34142752	365.4829532	5652.8987	0.8154	0.000259371	3965.377361	0.000223278	3403.613419	8.66E-05	1364.999387	0.874825843	73.40262533	381.8355777	6413.67919	0.8837	0.022772371	3873.858097	0.000597112	3460.637201	73.20351301	804.1690619	63.4665	62.2715	62.2345	6.330788083	7.229992237	8.808252366
0.904855675	0.194323644	172.157702	6814.366217	0.8738	0.000529221	2661.94667	0.000480124	2393.079329	9.98E-05	556.3522545	0.916347765	69.33600856	180.1745318	7569.526485	0.9345	0.021810734	2615.525415	0.000832338	2440.994141	69.22413617	318.0103799	0.909881783	0.189674778	172.8342051	6948.414373	0.8794	0.000527093	2668.557539	0.000478468	2421.140297	9.58E-05	559.3280646	0.907568761	70.16249865	177.5558082	7309.242719	0.9237	0.022063359	2607.229945	0.000838028	2405.127407	70.03351495	377.9511746	51.7083	48.9049	47.1208	14.12987654	15.43246111	17.14895937
0.89267854	0.225558659	278.7057728	6491.862896	0.8592	0.000309659	3457.81925	0.000277568	3075.431567	6.69E-05	809.6223231	0.909641694	69.98531317	291.6596112	7368.552484	0.926	0.021792981	3387.679698	0.000635257	3140.36431	69.85954016	453.350324	0.903080142	0.194680119	282.7177253	6770.04288	0.8722	0.000309481	3461.011351	0.000280338	3117.845639	5.73E-05	699.8462509	0.908975121	70.06227027	291.3798919	7348.222054	0.925	0.02181627	3386.944541	0.00063552	3137.316876	69.93506428	460.4042162	60.7703	57.5822	55.3756	8.267281168	9.05240538	9.782357826
0.871712354	0.322787103	212.5244536	5930.812583	0.8281	0.002635898	873.2432073	0.002099622	779.2220512	0.002135817	200.4254317	0.899494731	70.87971569	224.3725533	7082.122143	0.9145	0.024594282	838.0020776	0.00286902	779.8968111	70.73858982	99.9907053	0.89928853	0.225141799	217.0845005	6644.305244	0.8639	0.002892751	859.2827874	0.00252518	782.656094	0.000966767	156.0430605	0.9091118	70.1281108	228.1871889	7346.025968	0.9242	0.024359826	832.6977927	0.002897774	778.3209758	69.99618646	97.19054317	29.9569	26.0492	21.9207	11.9933666	11.30919004	9.922842915
0.856253922	0.389343247	805.2527881	5554.402726	0.807	0.000192234	5092.394176	0.000164599	4361.31255	7.48E-05	1979.242503	0.86200781	74.86226785	825.13704	6084.306494	0.8669	0.023143254	4973.71623	0.000542933	4386.275147	74.62214778	1223.617488	0.852497677	0.365279842	805.4539376	5503.090639	0.8076	0.000192243	5092.140664	0.000163873	4342.353929	7.01E-05	1861.028975	0.867540521	74.54812773	832.7767057	6202.542385	0.8706	0.023045635	4976.171376	0.000542289	4416.922327	74.30500891	1233.735125	70.1004	71.541	73.0656	3.146127753	2.999486456	3.477628019
0.862385248	0.331462045	422.09031	5727.631926	0.8194	0.000236989	4244.376007	0.000204766	3654.963043	7.81E-05	1410.085428	0.871065264	74.23390141	432.3462198	6287.097907	0.8743	0.022992647	4149.848107	0.000580569	3695.633415	73.99056334	1042.270502	0.856342962	0.355681538	415.3095884	5584.214444	0.8114	0.000236897	4248.429258	0.000203053	3637.529591	8.35E-05	1513.158491	0.873408397	73.60978101	437.2099172	6373.070578	0.8813	0.022812058	4146.110859	0.000578421	3697.984909	73.402862	891.8974243	65.2837	64.6127	65.6183	5.332467938	6.068072075	7.440927705
0.869176297	0.320585744	357.6181774	5878.562629	0.8263	0.000278913	3697.580661	0.000242653	3211.698411	8.90E-05	1185.077454	0.879193265	73.11587015	368.0099188	6515.203787	0.8872	0.022703593	3606.368913	0.000615263	3234.487112	72.91472991	759.8353246	0.867083249	0.317404488	354.3016374	5833.830321	0.8245	0.000279639	3691.295088	0.000243022	3196.033227	8.58E-05	1194.968587	0.878382774	73.04009009	370.4623874	6505.495045	0.888	0.022683388	3604.002365	0.000614601	3227.928822	72.84903768	728.7782658	61.7169	60.0027	59.1221	6.445971951	7.251268352	8.792883008
0.852323167	0.366815476	480.8891369	5492.490823	0.8064	0.003339083	362.7802579	0.002840778	309.9883137	0.00122257	130.3852927	0.876134496	73.53541879	507.699762	6428.507424	0.8823	0.025803344	355.3635951	0.003262506	319.9120043	73.32034315	75.85855151	0.861114613	0.339860482	489.9474972	5693.1684	0.8171	0.003299173	364.522947	0.002818525	315.2537284	0.001251341	114.5267409	0.879178516	72.89636956	510.6841632	6530.714061	0.8897	0.02562177	355.4749916	0.003284072	320.8052428	72.71043333	64.0352928	21.4492	17.7935	13.7373	5.226970381	4.72633661	3.915748806
0.901414022	0.207321285	222.7283297	6715.498216	0.8687	0.000456717	2577.712674	0.000413026	2316.419526	9.17E-05	546.8247957	0.909003444	70.04755728	231.165802	7349.538262	0.9252	0.021956439	2521.446498	0.000770629	2335.199292	69.91996321	345.716818	0.896456027	0.229500581	220.1955865	6572.647387	0.861	0.000459255	2567.397561	0.000414895	2287.001268	9.83E-05	618.6457607	0.907791476	70.16228213	231.1619573	7314.539461	0.9237	0.021991803	2516.900617	0.000771421	2324.869147	70.03350649	355.1360831	52.478	49.0593	46.0202	10.18738023	10.90718953	11.192515
0.956018026	0.073227761	151.0223191	8380.708789	0.9409	0.001302641	2836.302901	0.00121814	2725.54633	0.00019897	178.4353279	0.945765195	66.48957584	153.8729588	8524.666838	0.9737	0.021740762	2770.89165	0.001579853	2683.71919	66.43731027	133.4565061	0.947696736	0.089794602	149.1152812	8104.67717	0.9299	0.001265798	2837.922142	0.001156782	2704.459216	0.00032028	220.4163889	0.946303421	66.45534798	153.5807842	8541.971258	0.9742	0.021719431	2770.269862	0.001561063	2683.826696	66.40322629	132.2793061	51.2685	48.8333	52.0021	17.54727351	18.24553949	20.35170498
0.943352051	0.113064236	158.2599826	7946.657986	0.9216	0.010610567	2328.887044	0.009109745	2236.547776	0.00377618	155.8040365	0.934195922	67.63137009	162.6658312	8132.363409	0.9576	0.031701733	2261.538638	0.010220131	2183.981269	67.55646903	115.7618003	0.935291129	0.130072384	156.8723404	7696.170213	0.9118	0.0107763	2326.591687	0.009297896	2214.187298	0.004044063	188.7247203	0.933282513	67.78539291	162.0379826	8098.63273	0.9557	0.03129624	2272.267657	0.009538185	2198.757457	67.70707642	107.8280841	44.2639	41.8165	44.0603	20.82469344	20.98875956	22.3266671
0.943432104	0.097653293	195.0594787	7968.694171	0.9247	0.003191911	1037.197469	0.002955858	991.8944402	0.000443516	71.7375365	0.933312765	67.68791806	197.4469064	8105.646112	0.9568	0.023966846	1007.727843	0.003332882	967.8458272	67.610979	63.8534699	0.932980309	0.128188215	191.6998681	7630.740106	0.9096	0.003182888	1036.777265	0.002906114	980.1066914	0.000558648	100.6609499	0.932386782	67.78199895	197.736787	8075.147357	0.9555	0.023973838	1011.263946	0.003298738	972.7347872	67.70302314	60.4959707	31.1122	28.2667	28.2381	12.95875809	13.23347918	14.36309884
0.935629656	0.115607569	162.8099092	7721.022312	0.9143	0.010789108	1397.129717	0.00912459	1338.76928	0.004361139	86.67669255	0.92824746	68.16754368	167.4925279	7942.044201	0.9502	0.032085952	1362.374974	0.010306362	1319.884602	68.08311883	65.99294885	0.924529781	0.156476222	160.1555853	7369.244125	0.8979	0.01028629	1402.090879	0.008165594	1330.267731	0.006365121	120.0623677	0.927151055	68.40048569	166.9613557	7897.262908	0.9471	0.031874565	1358.497835	0.009817314	1310.360155	68.30649733	77.04519058	33.0664	30.7937	30.3527	19.05483117	19.0964955	20.54029461
0.945826744	0.094241967	168.3681259	8043.33017	0.9274	0.007588242	1088.643627	0.006499738	1047.291709	0.002267144	62.00970455	0.934056517	67.64654272	171.1000627	8127.210779	0.9574	0.028638909	1062.185607	0.00748096	1027.512747	67.56997474	51.24650094	0.931614513	0.128069596	164.446757	7591.464266	0.9081	0.007734879	1092.227398	0.006635298	1037.484524	0.002457667	90.65631538	0.92946989	68.08093336	170.325205	7979.044356	0.9514	0.02865953	1065.273176	0.007243208	1027.789215	67.99619557	55.50199706	31.2189	27.4803	27.1936	16.31097124	15.73852636	15.83684688
0.922472052	0.149135527	192.0275516	7317.691132	0.8965	0.01480154	712.8688232	0.012486794	681.4308451	0.005029229	53.15158951	0.919266109	69.10473549	198.2030717	7654.735495	0.9376	0.036586228	690.1223336	0.014251863	665.4401531	68.99826196	38.31036689	0.914214242	0.1898017	189.7163739	7055.504476	0.8825	0.015224891	707.3533144	0.013106877	664.8076593	0.005401162	77.52679887	0.917258236	69.40291314	196.7382457	7585.640248	0.9337	0.036257974	695.5556389	0.013546005	672.8275264	69.28717819	36.30009639	23.8656	20.6524	20.1847	15.36541365	14.58025289	14.67794897
0.908355493	0.196758731	219.9520657	6898.032184	0.8762	0.027085902	584.5758959	0.023248463	554.0248705	0.009411652	50.8291486	0.90527308	70.5016315	230.2891016	7233.805525	0.9194	0.049142927	566.9159234	0.025192882	544.0806074	70.36705058	34.74787905	0.89516351	0.239679032	216.8858007	6540.711362	0.8599	0.02650476	582.7261309	0.021900945	543.4590268	0.012336526	70.35736714	0.906713628	70.49929309	230.7853181	7265.845242	0.9195	0.048281856	563.1373573	0.023813096	538.1472651	70.36090873	40.60543774	19.9941	17.7439	17.3519	14.83384863	14.70269747	14.88680175
0.91215577	0.181179138	180.3426304	7011.175283	0.882	0.019372595	966.5673469	0.01623725	917.8974963	0.007193918	82.17063492	0.912379587	69.80439466	189.9482981	7443.435157	0.9284	0.041559982	931.7645411	0.018574319	894.2943326	69.68309946	60.82539854	0.905101213	0.22132843	177.8885314	6794.79476	0.8702	0.019895027	966.1216962	0.016992474	907.5526849	0.007761746	100.3817513	0.908443587	70.30260304	187.19718	7318.61757	0.922	0.040952617	938.8289588	0.017217935	901.983888	70.16796019	61.00433839	25.4391	22.5541	22.9253	19.14193541	19.07470768	20.06567517
0.930765163	0.143931019	160.4275923	7549.369666	0.9046	0.015396959	1918.376852	0.013426062	1836.977206	0.004653842	140.1085563	0.92537302	68.5926357	167.6191937	7842.217226	0.9451	0.036426331	1858.769971	0.014429783	1793.614786	68.49785824	95.69992593	0.923312119	0.163408913	158.6595555	7326.721658	0.8953	0.01522282	1918.982911	0.013013182	1823.724795	0.005457395	164.3738412	0.925698088	68.57321202	167.4312315	7850.948159	0.9452	0.035939935	1863.877909	0.013684348	1802.647766	68.47908089	89.80395683	37.5704	35.2158	36.9438	23.11238291	23.20682724	24.57361271
0.958229641	0.067245579	145.1359737	8458.265064	0.9443	0.000729423	3079.538706	0.000687016	2967.803632	7.14E-05	179.9961877	0.946688899	66.38474159	148.4803117	8557.832855	0.9752	0.02113289	3003.887613	0.001033946	2909.279142	66.33504863	143.1614028	0.950418911	0.081023226	143.6704485	8198.829605	0.9343	0.00074662	3072.796853	0.000710485	2932.757451	6.25E-05	230.7337044	0.948284758	66.26079836	147.8094166	8611.325077	0.977	0.021097636	3010.944422	0.001038556	2925.577718	66.21283112	128.4895599	52.934	50.5146	54.0291	19.290434	20.00116964	22.26065707
0.96007311	0.062077703	187.4170186	8523.785895	0.9472	0.000500511	2799.357369	0.000478864	2695.762526	3.30E-05	161.4508024	0.951218223	65.97125968	190.5026498	8714.982267	0.9812	0.020772637	2737.652059	0.000809394	2661.099654	65.92939435	109.9434366	0.958035494	0.066610187	187.0590914	8453.190194	0.9443	0.000501469	2793.06841	0.000479515	2679.44022	3.43E-05	181.2288468	0.949964853	66.13812832	189.6021659	8666.96036	0.9788	0.020822607	2741.591949	0.000810093	2664.678062	66.09105448	119.9631181	54.5234	49.7775	47.1361	15.82014072	14.39344968	15.19695946
0.954755022	0.076873935	203.9346252	8337.360945	0.9392	0.000973037	1687.552172	0.000931612	1615.288047	7.15E-05	118.1711031	0.947726889	66.35225992	207.5747668	8588.891155	0.9757	0.021345269	1655.895255	0.001253423	1608.123422	66.30106517	75.37859998	0.956616746	0.068746022	205.6242309	8406.086357	0.9426	0.000971067	1686.512837	0.00093009	1617.103619	6.59E-05	107.9199024	0.94546198	66.48120764	207.3284042	8517.169439	0.9738	0.021384329	1655.23588	0.001250952	1603.171761	66.43042741	75.14499897	42.9701	37.7055	34.5601	15.56145257	12.72525716	13.59283591
0.961312556	0.060187625	183.6299146	8565.60293	0.9487	0.000500184	2767.86687	0.000479942	2668.19291	3.17E-05	153.3556446	0.951625059	65.93714984	186.5583172	8729.008964	0.9817	0.020762006	2705.793318	0.00080969	2630.130129	65.8958139	108.8329429	0.957060861	0.070769231	182.9857825	8416.858462	0.9425	0.000501762	2756.695066	0.000480437	2637.33251	3.50E-05	194.6375597	0.951112402	66.06357792	186.2484947	8704.762017	0.9799	0.020798937	2709.504031	0.000809578	2635.369087	66.01686242	119.5799571	54.6037	49.198	46.4161	16.43256664	14.40130536	15.62638028
0.95300137	0.081144565	229.6653854	8277.221866	0.9366	0.000950661	1594.961243	0.000907424	1525.249867	7.58E-05	119.7317959	0.946801399	66.36340338	233.5062019	8562.686315	0.9755	0.021329671	1563.903127	0.001233893	1517.289629	66.31465427	67.80317786	0.954525891	0.081565199	229.4770231	8323.423713	0.9379	0.000949803	1596.403455	0.000907765	1529.314601	7.90E-05	115.9233394	0.944435055	66.62214447	232.5153324	8478.674213	0.9718	0.021404886	1564.688619	0.001228762	1514.63708	66.56714672	75.24644989	41.5291	36.4264	33.7157	15.17751472	12.8692262	14.07660021
0.959169898	0.065679535	232.7129561	8489.986145	0.9455	0.000526782	2368.488207	0.000505816	2271.840835	3.37E-05	154.4253834	0.947633172	66.29462366	234.1311828	8590.596109	0.9765	0.020894529	2323.729339	0.000833638	2250.046499	66.24672211	109.4829493	0.960645949	0.063542326	233.0664978	8539.774119	0.9474	0.000525803	2371.247414	0.000504803	2280.314393	3.32E-05	147.2877349	0.949793263	66.10160319	234.9379148	8665.236087	0.9793	0.020836819	2323.129991	0.0008348	2253.723499	66.0573083	101.3017461	52.5127	45.7737	41.6831	13.62635089	11.40008282	12.98862866
0.960304371	0.062064598	182.4403631	8531.070087	0.9474	0.000562545	2566.585708	0.000538233	2475.291031	3.72E-05	142.8886426	0.951625059	65.93714984	185.9088316	8729.008964	0.9817	0.020822942	2505.512886	0.000867836	2436.133131	65.89581788	99.63756748	0.958736559	0.064621893	182.6255949	8478.300264	0.9455	0.000563001	2558.703014	0.000538227	2457.820505	3.86E-05	157.564569	0.950124553	66.09556872	185.035532	8674.956708	0.9794	0.020870691	2512.336839	0.000868198	2444.401394	66.05056833	101.8841127	52.1791	47.0049	45.5014	16.10701782	14.77900118	15.42102455
0.926585615	0.131060438	263.2448528	7450.665265	0.9034	0.020338916	377.2342263	0.018094575	356.2225727	0.004390891	35.3040735	0.924695027	68.59509202	268.7323884	7827.751428	0.9454	0.041381868	369.7301671	0.019469543	355.7794256	68.50495029	21.35603977	0.931606868	0.126348228	263.5190403	7594.172793	0.9086	0.020802368	379.2662338	0.018938102	361.2873895	0.003594535	29.98503192	0.925679591	68.46497623	269.9624934	7857.473323	0.9465	0.041269323	368.1466455	0.019295256	353.7221151	68.3756173	23.90903328	21.5791	14.2175	10.4882	13.1874995	10.74732496	8.678805261
0.955832772	0.072802636	216.7147412	8375.753321	0.9409	0.000590654	2206.789244	0.000564894	2112.30836	4.20E-05	155.2404081	0.948690938	66.291624	220.0309236	8619.468769	0.9766	0.020953743	2166.814766	0.000892618	2103.976685	66.23994639	101.9178784	0.958428131	0.065185185	217.7949206	8467.586667	0.945	0.000589487	2209.700741	0.000564563	2123.222707	3.93E-05	135.6801058	0.948192412	66.27497952	220.5757576	8607.536446	0.9768	0.020950049	2163.846847	0.000892946	2098.235117	66.22638089	100.2197993	50.1211	44.0242	39.9883	13.65244428	12.27335384	12.59089207
0.953283011	0.079697002	193.4295316	8288.319321	0.9373	0.000877693	1855.177745	0.000839331	1773.221031	6.76E-05	133.6354422	0.94536128	66.5244554	197.2065351	8510.865598	0.9732	0.021305932	1815.370325	0.001165019	1755.112428	66.47137846	89.93485409	0.954874401	0.071018499	194.8194769	8349.176058	0.9406	0.000874856	1854.270359	0.00083555	1775.463347	6.19E-05	122.5291303	0.945504876	66.48854883	197.0725069	8517.788949	0.9737	0.021291979	1821.601828	0.001158679	1766.377846	66.43724591	81.336654	44.9842	39.533	36.5535	15.8889254	13.41431739	14.08660136
0.958968451	0.063861281	195.4736731	8486.465426	0.9458	0.000494062	2719.771093	0.000472266	2617.053832	3.32E-05	160.3083104	0.951754623	65.95883432	199.0248624	8731.046057	0.9814	0.020761417	2660.64622	0.000802324	2589.052994	65.91595958	107.0229264	0.958932347	0.062790698	195.597463	8486.864059	0.946	0.000495487	2712.991966	0.000474822	2604.947724	3.16E-05	163.6165962	0.950450965	66.02570379	198.1140351	8689.173603	0.9804	0.02078248	2664.497756	0.000802643	2592.529762	65.98319254	102.5358017	53.7194	49.2786	46.0377	15.28498818	14.01479868	14.55117448
0.954202428	0.075071877	238.6620168	8322.825578	0.9391	0.001059537	1419.069961	0.001012102	1358.901013	7.55E-05	101.6497711	0.942569209	66.72482737	240.7095744	8420.450685	0.9703	0.021544861	1390.735443	0.001333604	1342.43044	66.6700588	68.88086159	0.955445426	0.076399234	239.9078527	8358.897851	0.9398	0.001054776	1418.801766	0.001005078	1360.169749	8.17E-05	102.9691424	0.945605084	66.55427632	241.8184622	8515.151933	0.9728	0.02149371	1389.361945	0.001338134	1344.348465	66.498721	71.99444901	39.6338	34.863	31.2707	14.15967858	10.96550186	11.79819569
0.959830651	0.063596028	180.2824847	8513.854638	0.9466	0.000523004	2772.23727	0.00050205	2666.092739	3.31E-05	165.5155293	0.949353533	66.20032723	182.3416505	8645.236834	0.9779	0.020862798	2715.100215	0.000832136	2634.562288	66.15188096	124.1843747	0.959050179	0.065468006	179.8171338	8486.675727	0.9455	0.000524244	2768.542253	0.00050371	2658.212939	3.24E-05	178.0608144	0.947766066	66.33804693	182.8001844	8591.028896	0.9759	0.020903624	2710.172149	0.000830482	2622.103447	66.28745379	136.4129521	55.4049	48.7375	47.2325	16.9077898	14.20026034	15.67576613
0.958004818	0.071133256	177.3886356	8445.956006	0.9433	0.000581298	2548.554543	0.000556004	2448.860174	4.30E-05	165.9161454	0.946531096	66.36969448	179.9698585	8554.795571	0.9754	0.02097103	2497.042957	0.000883775	2420.850879	66.32143636	112.5529014	0.959486524	0.068232307	177.5352798	8496.587644	0.9453	0.000581867	2548.400614	0.000557562	2453.211438	3.98E-05	161.4077013	0.949093388	66.20679075	180.5277153	8637.326447	0.9778	0.020922658	2492.743506	0.000887553	2417.918588	66.15865003	110.6154633	52.2978	46.2114	44.3167	17.52154431	15.72455119	18.4788041
0.963321524	0.061349048	201.4463854	8628.004946	0.9503	0.000403293	3229.940545	0.000388702	3112.797171	2.42E-05	190.8085868	0.951620036	65.91588595	204.0519348	8730.469857	0.982	0.020657815	3168.26721	0.00071327	3081.238852	65.87567995	121.836558	0.962051561	0.058006106	201.6185914	8592.331298	0.9499	0.000402737	3235.233393	0.000387205	3119.202428	2.34E-05	179.1854932	0.952605093	65.87665378	204.0083452	8761.28048	0.9826	0.020647427	3166.150824	0.000717063	3080.469483	65.83545349	126.6245675	58.8766	53.7997	52.9971	15.45966275	13.43231849	15.03924505
0.953680763	0.076086957	176.3226769	8305.265772	0.9384	0.000952676	1874.723039	0.000907839	1795.568884	7.06E-05	129.6936275	0.945544589	66.47427867	180.0124243	8519.943629	0.9739	0.021362247	1834.966732	0.001228665	1776.989741	66.42360766	84.89649861	0.957354309	0.068051728	177.4441382	8429.96184	0.9434	0.000950198	1871.559148	0.000907886	1796.525046	6.86E-05	116.8491626	0.950004299	66.11653559	180.6647942	8670.024002	0.9791	0.021256525	1836.771321	0.001235847	1787.961302	66.07082472	73.53855582	43.6419	39.8598	37.0989	16.39742249	14.53044886	14.95026818
0.958873285	0.065481858	163.392468	8481.017137	0.9453	0.000510907	3079.707606	0.000486506	2963.842652	3.86E-05	182.8128636	0.950379423	66.0252958	166.3820889	8687.371277	0.9804	0.020801727	3010.172787	0.000821471	2924.355087	65.98319306	120.2188902	0.960499625	0.062473618	162.8550021	8536.919375	0.9476	0.000515566	3074.184994	0.000495671	2958.612466	3.32E-05	176.5547699	0.951448248	65.97910509	166.7341759	8720.877688	0.9811	0.020787888	3005.477219	0.000822848	2919.225674	65.93611472	127.3145449	57.2351	51.392	50.1741	18.52285691	15.73999797	17.38093177
0.954000823	0.075202386	172.7273115	8316.103749	0.9388	0.000811364	2142.945462	0.000771336	2050.98703	6.69E-05	149.7905837	0.946547321	66.34105349	175.7007584	8557.4091	0.9758	0.021191443	2097.724226	0.001105129	2031.991827	66.29425909	93.02244312	0.958339953	0.068742718	173.2495498	8459.65099	0.9441	0.000810823	2147.073403	0.000774249	2066.126721	6.40E-05	126.87406	0.944748513	66.56590582	175.0945918	8490.923298	0.9726	0.021256151	2101.983652	0.001100798	2034.924057	66.51238528	99.4144561	47.3857	42.1796	40.0376	17.47673126	15.33755339	17.06014614
0.964001821	0.057464019	224.8451518	8655.664986	0.9519	0.000264149	4269.295514	0.00025464	4118.989721	1.53E-05	237.926778	0.955184035	65.6667343	227.584965	8850.525008	0.9857	0.020447436	4182.369484	0.000583836	4079.059078	65.62839625	159.4524703	0.964902444	0.055281653	224.6200566	8688.120319	0.9533	0.000264409	4266.258575	0.000255247	4118.68142	1.41E-05	236.3432288	0.949345764	66.15001022	225.9497241	8649.11731	0.9786	0.02059351	4188.306254	0.000584035	4065.273372	66.10454958	181.9791539	67.728	62.448	64.0271	14.11222222	12.30182491	13.8420723
0.952081553	0.078171721	173.4589919	8253.199487	0.9364	0.001001424	1834.609141	0.000950874	1753.451354	8.30E-05	129.7676207	0.944436481	66.65143092	176.3553634	8476.221742	0.9714	0.021468494	1797.383673	0.001282509	1739.372325	66.59456297	91.27105209	0.954097688	0.07748055	173.7238623	8315.624534	0.9383	0.001000459	1835.905467	0.000951472	1758.713567	8.43E-05	124.5845678	0.943711054	66.69939219	176.6969197	8453.288246	0.9707	0.02148263	1795.27815	0.001280557	1734.745931	66.64258515	94.77644998	44.1561	38.7888	35.8883	16.69251727	14.67178907	16.14321601
0.958172719	0.070156846	227.1430691	8452.442772	0.9436	0.000886572	1685.526282	0.000849535	1618.895835	6.23E-05	111.1582238	0.944998188	66.53751285	228.3044193	8500.151079	0.973	0.021322556	1649.319527	0.001177184	1592.960452	66.48504099	82.24439877	0.957351828	0.071716529	226.1758965	8424.795884	0.9426	0.00088585	1686.124549	0.000846988	1619.007193	6.26E-05	113.7707405	0.947338932	66.40123077	228.7288205	8574.530872	0.975	0.021280125	1652.456923	0.00117747	1602.227168	66.34866118	79.31158974	43.4446	37.5928	34.1903	15.53048392	12.49543869	13.33518226
0.958378193	0.068092767	206.0524198	8461.827915	0.9443	0.000561811	2390.683152	0.000538531	2297.921086	3.80E-05	151.7631049	0.948863796	66.19141104	209.4134969	8632.428016	0.978	0.020897047	2341.853374	0.00086575	2273.861024	66.14511929	100.1014315	0.957193234	0.069466539	206.2041574	8422.81822	0.9429	0.000560376	2393.304168	0.000535492	2299.281255	4.07E-05	150.8148266	0.948176878	66.30356411	209.6042605	8604.980131	0.9764	0.020929556	2341.46569	0.000864364	2271.729341	66.25351202	109.4390619	51.3121	45.8003	42.7815	14.56068314	13.03681019	13.24501256
0.953108515	0.077989971	177.6149579	8284.602262	0.9373	0.000977406	2280.112451	0.000930405	2191.273582	7.93E-05	138.7796863	0.945408673	66.54589372	182.1799774	8510.889197	0.9729	0.02141234	2225.044609	0.0012596	2159.052555	66.49188307	99.59903382	0.951889305	0.083636364	178.1796791	8239.686203	0.935	0.000979717	2269.573476	0.000933274	2171.259807	8.26E-05	165.1354011	0.945348871	66.50261941	181.6058552	8512.320596	0.9735	0.021397537	2234.216949	0.001255383	2175.102343	66.45090163	85.67950693	46.152	41.1613	36.6033	23.0072705	21.8426162	23.23100792
0.953102222	0.077546667	235.8974933	8285.33024	0.9375	0.000834522	1665.501867	0.000796948	1589.822297	6.30E-05	123.7281067	0.945642893	66.51078693	238.5278406	8519.739881	0.9734	0.02126004	1632.727347	0.00112383	1579.540768	66.45771713	83.57437847	0.955061268	0.077070471	235.7606983	8346.323398	0.9394	0.000832714	1670.315946	0.000795538	1600.68819	6.53E-05	114.4259102	0.94720062	66.37906285	239.047165	8572.515431	0.9753	0.021218611	1635.949964	0.001121963	1586.983262	66.32825066	74.46847124	43.2732	37.9608	34.5618	13.38508729	11.47124507	11.85785734
0.957154686	0.070117747	224.6698844	8420.637	0.9427	0.000607012	2140.179697	0.000581481	2051.801345	4.18E-05	144.1661186	0.94913648	66.21407385	227.3142068	8637.984146	0.9777	0.020946892	2102.038764	0.000908118	2042.945793	66.16541933	91.50813133	0.955264223	0.07229428	223.9513077	8359.170529	0.9406	0.000605155	2146.426324	0.000577263	2058.200145	4.57E-05	140.4671486	0.94710789	66.393293	227.6103989	8568.730489	0.9751	0.02100072	2099.372885	0.000906914	2034.606178	66.34184385	101.750282	49.2473	43.3455	39.7773	13.68569117	11.99753015	12.12773288
0.954076311	0.072911123	265.0125599	8322.143161	0.9395	0.000802816	1586.220862	0.000766132	1515.923621	5.69E-05	113.3614689	0.947437113	66.36565864	267.3817529	8579.876064	0.9755	0.021185962	1554.358278	0.001095483	1505.267448	66.3146485	76.88662225	0.952747826	0.079534536	263.7319312	8271.574357	0.9367	0.000801646	1588.667129	0.000763465	1517.018722	6.52E-05	117.212448	0.945503559	66.49609696	266.8342235	8516.872021	0.9736	0.021226271	1553.649035	0.001095451	1501.120778	66.44406295	79.10507395	43.4987	37.2304	32.0635	11.88198629	10.3592044	10.79372353
0.955735252	0.070533248	240.4421075	8376.196516	0.9414	0.000681886	1902.705439	0.000652643	1820.779784	4.73E-05	129.1676227	0.947015122	66.40752898	242.5808801	8564.946456	0.9749	0.021079147	1867.192327	0.000979659	1809.55238	66.35545661	91.59041953	0.954091644	0.076283827	239.2616663	8317.239932	0.9386	0.000680634	1906.794588	0.00064942	1824.241818	5.29E-05	133.6904965	0.947413724	66.35123501	243.1344676	8580.301425	0.9757	0.021061666	1866.923747	0.000978351	1809.595411	66.30104978	87.64620273	46.5081	40.8611	37.3213	13.21219643	11.39943888	11.44047492
0.953777985	0.07761194	153.7528785	8305.671215	0.938	0.000940134	3532.345309	0.000894981	3405.63274	7.80E-05	193.234968	0.946666995	66.43478707	158.1460236	8553.665572	0.9745	0.021340595	3455.337096	0.001221424	3373.419745	66.38271163	125.5842996	0.953647935	0.082079197	154.7788451	8295.509339	0.9369	0.0009418	3517.736365	0.000897582	3381.093682	7.99E-05	226.8194044	0.945916502	66.4614516	157.8401601	8530.750539	0.9741	0.021347019	3450.69305	0.001217416	3361.968114	66.40997216	124.6943846	52.787	48.5168	44.8063	32.695413	32.26985773	34.02730639
0.95516656	0.073928305	232.9872354	8353.694607	0.9401	0.000675851	1950.797149	0.000646607	1866.922807	4.74E-05	138.0059568	0.947067391	66.4150595	235.7767747	8565.66229	0.9748	0.021075285	1913.171317	0.000974579	1853.637266	66.36226414	92.5414444	0.956267254	0.070715651	233.1509875	8392.301126	0.9418	0.000675338	1952.300913	0.00064665	1871.565039	4.65E-05	129.5971544	0.944438632	66.57897984	235.9572193	8481.837927	0.9724	0.021125501	1912.055121	0.000973395	1847.133431	66.52605416	95.44981489	47.5028	41.2011	37.4318	12.92873513	11.67755363	11.7303516
0.954450331	0.075497817	219.9462251	8329.38505	0.9391	0.000712014	1977.651794	0.000680324	1893.022954	5.14E-05	140.0352465	0.947672416	66.3597786	223.0369004	8586.314678	0.9756	0.021095708	1936.264965	0.00101167	1876.455075	66.30784624	92.79868799	0.953785821	0.074890806	219.5349952	8310.022904	0.9387	0.000712451	1976.428145	0.000680737	1889.94953	5.12E-05	140.7994034	0.945659516	66.48202916	223.561717	8522.341959	0.9738	0.02113276	1934.140583	0.001009685	1869.630289	66.43041154	97.02115424	47.4735	41.3961	37.4557	13.50914127	12.2731416	12.43492008
0.957946877	0.070171719	195.998728	8445.255459	0.9434	0.00057518	2409.090736	0.000549994	2312.264283	4.21E-05	161.3214967	0.94927656	66.1859728	198.4203047	8643.985789	0.9781	0.020910438	2360.396994	0.000881477	2291.136729	66.13835684	107.1690011	0.96131193	0.062645012	197.3767138	8562.144273	0.9482	0.000572983	2413.252478	0.000548762	2327.011194	4.28E-05	136.138262	0.947384844	66.35813858	198.2101271	8579.158467	0.9756	0.020961858	2360.95695	0.000880086	2287.923343	66.30784033	113.5552481	51.7127	45.7993	42.2949	15.45459021	13.38125628	14.07305702
0.946043829	0.092554682	217.4995151	8052.719427	0.9281	0.000177881	6228.330568	0.0001687	5890.557847	1.55E-05	582.7786876	0.940206947	67.02318601	220.733982	8334.93334	0.9661	0.020772628	6092.591036	0.000506298	5839.196666	66.95984886	409.1436704	0.944214931	0.103537812	215.712972	7984.220167	0.9243	0.000178285	6216.68084	0.000169059	5859.795701	1.70E-05	666.5948285	0.942440692	66.83443435	221.8069777	8407.993807	0.9688	0.020714914	6103.031482	0.000505196	5870.220708	66.77323488	383.4289843	82.6478	77.1744	68.7833	12.41656777	12.74222055	12.9197423
0.949345174	0.088001717	234.343636	8156.752307	0.9318	0.000168682	6548.965229	0.000160473	6215.862472	1.40E-05	582.6840524	0.942691218	66.79799856	237.3881151	8418.10554	0.9693	0.020695607	6410.431342	0.000496824	6163.092167	66.73878975	397.1072939	0.946238759	0.094730036	232.2169415	8055.768402	0.9279	0.000169356	6531.889967	0.0001611	6166.77042	1.45E-05	645.3914215	0.944156811	66.68688845	237.1062931	8465.832836	0.9709	0.020661856	6407.016274	0.000496663	6165.775518	66.62880699	391.3749099	84.0608	79.5184	71.7118	12.45518781	12.62112758	12.66900709
0.950305797	0.086933219	199.415693	8187.096688	0.9329	0.0001927	5903.760639	0.000183383	5611.166527	1.61E-05	514.6322221	0.9415623	66.85976869	202.3601817	8383.216233	0.9684	0.020738049	5789.153862	0.000519244	5568.221881	66.80081645	339.3986989	0.949151794	0.095796151	198.4970433	8140.579615	0.9301	0.00019279	5904.837437	0.000183304	5605.933342	1.76E-05	565.0730029	0.94729218	66.37236006	204.1150297	8575.372975	0.9754	0.020590767	5780.836887	0.000518206	5585.892207	66.32141586	301.8921468	80.1223	74.7819	67.0069	13.86928775	14.01902038	13.98660975
0.957464634	0.068801018	211.9871727	8432.241599	0.9433	0.000190189	6014.896745	0.000181836	5756.798825	1.34E-05	415.4884978	0.951041072	66.01325719	215.3428513	8706.84846	0.9806	0.020481069	5891.282684	0.00051582	5714.184241	65.96971986	267.6536814	0.953589557	0.081865727	209.8596435	8293.91664	0.9369	0.000191388	6016.427047	0.000183147	5735.832325	1.45E-05	491.1325648	0.949623747	66.18658624	214.9341581	8654.16941	0.9781	0.020532789	5894.664554	0.000516168	5711.150825	66.13833792	289.1593907	81.8691	75.2823	65.7392	13.40692975	13.40768461	13.41401444
0.950059117	0.086737429	203.5961188	8179.867803	0.9327	0.000185057	6122.273614	0.000176132	5814.944692	1.53E-05	537.7350702	0.941887148	66.86100785	206.4626188	8391.667493	0.9684	0.020730527	6003.48482	0.000512096	5774.297	66.80081611	364.8985956	0.95154505	0.093053173	202.5846913	8216.531089	0.9328	0.000185291	6120.221484	0.000176758	5821.178338	1.60E-05	581.1529803	0.947061237	66.3644285	208.2479754	8569.594567	0.9755	0.020581048	5998.582881	0.000510708	5795.588787	66.3146166	306.8441825	81.604	76.2917	68.267	13.74667174	13.943723	13.82416403
0.954225831	0.074973376	231.0937167	8323.194249	0.939	0.000187353	5972.684239	0.000178715	5692.579107	1.38E-05	458.0109691	0.947223975	66.3934981	234.385704	8572.092811	0.9751	0.02059243	5856.770793	0.000513974	5660.133285	66.34181987	314.6885448	0.949180735	0.096184847	227.7232671	8143.361096	0.9305	0.000188139	5977.403546	0.000179081	5671.368297	1.67E-05	582.81741	0.945202064	66.58165364	233.4568079	8502.264089	0.9724	0.020649246	5852.197244	0.000514813	5640.260392	66.52602746	341.5351707	82.0352	75.085	65.1392	12.43049319	12.49486995	12.52047217
0.952062609	0.084394053	249.0564766	8243.561771	0.9349	0.000187054	5984.749599	0.000178193	5690.86535	1.52E-05	514.9856669	0.945367558	66.56775653	253.3845363	8507.817397	0.9726	0.020644338	5869.529303	0.000513952	5662.422597	66.51234749	336.4921859	0.949737412	0.094813701	247.4269301	8162.007409	0.9313	0.000187799	5989.321486	0.000179033	5685.312475	1.62E-05	575.0982498	0.943729655	66.69980426	252.424745	8453.444009	0.9707	0.020684807	5857.772844	0.000515047	5632.752109	66.64253534	360.2101576	82.4084	75.1646	65.0988	11.73184595	11.75950283	11.68180802
0.950381736	0.084404456	200.8708226	8193.157669	0.9336	0.000198347	5773.412918	0.000188913	5487.496614	1.58E-05	489.9298415	0.943044429	66.7628377	204.2905754	8430.237987	0.9698	0.020713711	5664.626624	0.000524153	5458.837684	66.70438326	325.8740978	0.950594102	0.090402145	200.5236461	8191.338445	0.9325	0.000198391	5773.170617	0.000189028	5487.793455	1.70E-05	522.907882	0.948848556	66.21992635	206.0268003	8629.870704	0.9776	0.020550337	5653.109554	0.000523152	5470.968143	66.17216504	278.8059534	79.1705	73.9728	66.173	13.81405189	13.90556939	13.89118681
0.949765189	0.085003752	225.813592	8173.777575	0.9329	0.000172737	6425.75067	0.000164342	6101.201872	1.40E-05	554.1403151	0.943253644	66.75626353	228.2883802	8436.377668	0.9699	0.020687038	6288.112589	0.000500764	6046.868628	66.69750387	389.4988143	0.947363264	0.09319845	223.2757211	8091.185751	0.9292	0.000173448	6410.008825	0.000165154	6058.591834	1.47E-05	621.3582652	0.943741599	66.72176422	228.1805441	8451.983306	0.9704	0.020676456	6287.734749	0.00050065	6049.060594	66.66313786	388.4090066	83.3979	78.6425	70.5823	12.7093814	12.94078412	13.02406337
0.958667766	0.067104149	216.4599915	8472.357113	0.9448	0.000193207	5932.497777	0.000185825	5686.353742	1.20E-05	399.48116	0.950930783	65.98450561	220.9292559	8705.904791	0.981	0.020474499	5813.056575	0.000517205	5640.079867	65.94282085	247.9635066	0.95544234	0.076939449	215.4133234	8357.976482	0.9397	0.000193333	5930.529211	0.000185361	5664.189231	1.36E-05	461.2323082	0.950585272	66.11131536	219.7928922	8686.739175	0.9792	0.020511927	5812.90288	0.000517994	5637.681146	66.06404015	279.5580065	80.8724	74.9729	65.9185	13.44504066	13.49001726	13.51424647
0.955335301	0.074452244	215.5194639	8358.321846	0.9402	0.00035603	5473.584876	0.00034641	5222.193516	1.58E-05	418.5688151	0.948367672	66.33319672	219.3063525	8607.750615	0.976	0.020735579	5362.042828	0.000674224	5183.202519	66.28064641	299.9593238	0.95195783	0.080671012	214.1152901	8246.454856	0.9359	0.000323234	5471.617694	0.000287729	5200.987073	5.03E-05	457.840047	0.943083938	66.71908491	217.0342127	8434.86789	0.9704	0.020854312	5361.787407	0.000676398	5154.185021	66.66314036	315.8981863	77.6616	71.6232	62.8042	15.01507527	14.70907277	14.63640196
0.964350391	0.062039958	198.1932702	8659.87592	0.951	0.000336663	5955.328707	0.000329617	5735.978293	1.20E-05	384.3821241	0.950766625	66.0555102	199.6516327	8695.442245	0.98	0.020634549	5836.593673	0.000656223	5656.121568	66.01011091	279.3997959	0.95829212	0.071428571	195.365621	8454.649216	0.9436	0.000304963	5952.716511	0.000272073	5694.726261	4.64E-05	441.9846333	0.950186949	66.09577292	199.7339187	8676.690627	0.9794	0.020647423	5842.710231	0.000657005	5664.38569	66.05054961	274.998979	80.6776	74.5903	65.9076	16.13803762	16.00626896	15.68237425
0.95649087	0.071238985	202.5596135	8398.52479	0.9419	0.000356921	5584.374774	0.00034727	5335.858258	1.55E-05	405.971653	0.947843569	66.39657471	204.7538714	8587.995795	0.9751	0.020755933	5472.624449	0.000675902	5290.507973	66.34182273	314.7170547	0.951956892	0.08513369	200.3129412	8240.355508	0.935	0.000324238	5583.927059	0.000288215	5310.138613	5.19E-05	485.9151872	0.946066379	66.4687885	204.1897331	8534.629774	0.974	0.020779159	5469.27885	0.000676145	5274.418215	66.41674633	300.4220739	78.0828	72.305	63.3876	15.71147174	15.43880096	15.39709603
0.948971067	0.083208235	219.8089213	8152.405533	0.9326	0.000232004	5051.381085	0.000221296	4785.804279	1.74E-05	431.3524555	0.945816114	66.50467386	225.4645095	8524.45208	0.9735	0.020668156	4954.197021	0.000554934	4779.466873	66.45085895	277.9343606	0.944244319	0.092498651	219.6493254	7999.559741	0.9265	0.000230718	5063.718618	0.000217964	4783.724571	2.08E-05	467.627415	0.941552978	66.85956216	224.2294506	8383.129492	0.9684	0.020775535	4957.023131	0.00055541	4762.085497	66.80081882	293.2206733	75.6097	68.6999	59.7331	13.31462977	13.08199679	12.64599005
0.953935728	0.074989348	226.2675756	8314.441841	0.9388	0.000198957	5742.742863	0.000190406	5478.019787	1.39E-05	431.7667235	0.949396648	66.20760892	230.7688689	8645.902229	0.9778	0.020546677	5623.726427	0.000523744	5446.683212	66.15863015	285.3345265	0.952114603	0.084455848	224.8321574	8246.513149	0.9354	0.000199152	5741.323498	0.000190371	5465.13197	1.54E-05	488.1312807	0.944243606	66.59983541	228.8312931	8475.138875	0.9721	0.020666144	5620.605699	0.000524985	5412.125301	66.54655827	310.053081	79.9282	73.685	64.5384	12.91547308	12.82967556	12.80954821
0.941570933	0.100032513	179.2154546	7911.769264	0.9227	0.000315116	4364.978108	0.000298464	4114.073945	2.87E-05	419.6599111	0.941991927	66.85462055	185.1189468	8394.599174	0.9685	0.020853406	4277.128653	0.000631708	4118.957353	66.79392694	253.7344347	0.93273167	0.12468417	177.7621663	7629.369988	0.9103	0.000307134	4385.497199	0.000281917	4109.878611	4.54E-05	499.3784467	0.935982632	67.40678672	183.2460706	8195.394504	0.9607	0.021020728	4277.375247	0.000633585	4093.351569	67.33623481	291.5668783	69.8453	63.0681	54.2309	15.58047393	14.70746961	14.00044946
0.958873343	0.066229369	212.879179	8480.10474	0.9452	0.000294142	5805.964346	0.000286377	5563.457576	1.23E-05	391.7616377	0.950412627	66.08227848	216.538383	8684.029196	0.9796	0.020601469	5684.9755	0.000615593	5507.633223	66.03706386	273.4052675	0.954776967	0.079791201	210.0693512	8334.116438	0.9387	0.000268022	5807.362949	0.000239309	5542.823845	4.15E-05	472.2676041	0.945937583	66.44678231	213.8954121	8532.744842	0.9743	0.020712587	5685.781382	0.000617286	5482.997736	66.39629345	298.8354716	80.2298	73.8514	64.5547	14.34084349	14.2556767	14.04670808
0.951890057	0.076545319	227.0254083	8250.025729	0.9367	0.000202534	5670.268603	0.000193614	5397.993853	1.42E-05	433.6154585	0.948500129	66.26202661	232.7289662	8616.704197	0.977	0.02056653	5554.684749	0.000526906	5376.526277	66.21280336	278.0607984	0.953771983	0.08084471	227.9697099	8301.966084	0.9376	0.000202552	5665.439313	0.000193995	5400.541698	1.49E-05	464.6566766	0.94564572	66.46776181	231.5293634	8522.881314	0.974	0.020629479	5547.728645	0.000527747	5349.271404	66.41674431	296.7541068	79.6918	73.021	63.6032	13.13374329	13.10537138	12.93461054
0.96085485	0.069005601	196.0153228	8538.395963	0.9463	0.000352313	5885.610483	0.00034433	5644.862496	1.37E-05	425.9439924	0.949328889	66.19345603	198.3811861	8644.715337	0.978	0.020690428	5774.686503	0.000670461	5589.913919	66.14510215	292.3570552	0.95693781	0.073036093	194.4855626	8410.080255	0.942	0.000319546	5888.265711	0.000285645	5625.919813	4.78E-05	446.3952229	0.949388847	66.15728155	198.8601942	8649.775064	0.9785	0.020679532	5778.244149	0.00066948	5597.018853	66.11130289	276.5184466	80.0303	74.1939	65.2477	16.4724856	16.2425707	15.99604778
0.963080715	0.063085835	194.5471301	8617.443813	0.9495	0.000330376	5907.177778	0.000323375	5678.997777	1.16E-05	393.2616114	0.952241729	65.92534881	196.7164681	8746.972502	0.9819	0.020589223	5792.197984	0.000650545	5620.613185	65.88237833	265.7036358	0.959632294	0.069614896	192.4396953	8499.245662	0.9452	0.000304362	5914.949323	0.000276697	5671.746151	3.94E-05	422.9436098	0.95118975	66.02794778	196.2870257	8709.947572	0.9804	0.020619715	5799.364545	0.000649803	5627.725379	65.98317861	270.2711138	80.3102	74.3895	65.6955	15.9341889	15.98753858	15.61605519
0.939874179	0.136105033	135.287965	7816.18512	0.914	6.16E-05	19253.77298	5.85E-05	17996.90579	6.94E-06	2850.316411	0.934052588	67.78233571	140.3589368	8116.327334	0.9556	0.020884856	18881.12097	0.000400161	17926.65055	67.69558814	1842.63761	0.907951104	0.275121275	126.2106722	6819.379302	0.8658	6.18E-05	19238.78806	5.67E-05	17362.85175	1.44E-05	5638.047124	0.921840881	69.01341996	138.8621791	7722.502183	0.9389	0.021254967	18889.63297	0.000405023	17720.81448	68.89967592	2360.949089	140.3882	134.853	140.0852	24.11071755	24.17437054	26.08640529
0.97501294	0.040165631	97.76521739	9043.695238	0.966	0.000120479	11568.46884	0.000117655	11268.25689	4.49E-06	499.8989648	0.95749291	65.42903356	100.0167812	8935.381723	0.9892	0.020235151	11352.49798	0.000445767	11086.46093	65.39618255	383.045188	0.963964774	0.065164754	96.33614065	8642.917044	0.9499	0.00012043	11558.46015	0.000116149	11129.07877	7.22E-06	823.7119697	0.960975676	65.14878196	100.3640024	9058.618482	0.9934	0.020150017	11369.09462	0.000444619	11156.48211	65.11969336	333.0039259	106.1269	101.3945	105.8189	30.14292946	30.00884986	31.26397132
0.892007116	0.467147147	103.1309309	6300.72973	0.8325	0.002472651	4060.432072	0.001660653	3813.455947	0.006608977	475.1471471	0.898049298	72.90707071	110.5470258	6902.452301	0.891	0.024882604	3901.265769	0.002215069	3739.713855	72.60822005	290.0750842	0.889732428	0.641747216	100.0006118	6155.676863	0.8173	0.002182992	4126.069864	0.001371066	3874.096825	0.010067094	545.0798972	0.895413103	72.77364411	111.4506948	6856.742268	0.8924	0.024975079	3860.416965	0.002368249	3670.141528	72.49386968	312.4029583	55.8016	50.7544	48.4284	32.78388381	30.6260262	30.96677047
0.973442368	0.046521288	107.9686397	8981.327726	0.963	0.000132046	10628.94351	0.000129153	10318.05306	4.89E-06	549.684216	0.960471979	65.20269998	111.0396937	9039.439855	0.9926	0.020177348	10433.13097	0.000456133	10206.61501	65.17217745	359.2825912	0.962716774	0.063197809	106.6779018	8606.268801	0.9494	0.000131601	10640.51401	0.000127037	10222.24748	7.80E-06	709.1540973	0.958300261	65.39017983	110.8619923	8961.473631	0.9898	0.020233663	10431.45211	0.000456226	10179.868	65.35654126	387.993332	105.2856	97.6609	98.9101	25.28430803	25.44291475	26.56632112
0.90135307	0.304856641	116.1878291	6621.046343	0.8545	0.001769153	2345.041077	0.001452743	2225.752103	0.0014879	245.4502048	0.905749879	70.82610595	126.5322774	7219.659749	0.9155	0.023523881	2231.873949	0.001873983	2145.266415	70.66147747	157.2034954	0.87595782	0.467779551	110.616055	5913.701117	0.8147	0.00164978	2398.339266	0.001251642	2238.763524	0.00235618	372.7848288	0.88740024	73.08985475	121.2968134	6675.046391	0.8881	0.024131301	2274.679878	0.001781001	2167.572409	72.84211289	193.5018579	45.5486	37.211	34.9401	26.61376407	23.60543325	23.18536849
0.968673081	0.052873563	81.92727273	8813.584535	0.957	0.00011912	13697.39018	0.000115087	13274.79467	6.85E-06	692.0428422	0.954014112	65.72603574	85.01340374	8812.704915	0.9848	0.020324392	13380.97329	0.000446228	13004.51984	65.68836744	541.2387287	0.957223844	0.073248408	80.40849257	8418.177282	0.942	0.00012041	13615.02251	0.000115881	12981.08332	7.64E-06	1081.760085	0.9555808	65.61186011	84.94668018	8866.06072	0.9865	0.020289058	13408.37587	0.000444938	13074.47989	65.57516946	503.9628991	115.8873	109.6498	112.9116	33.20331307	33.88666935	37.26013936
0.935677141	0.136233795	95.36189848	7695.671501	0.9102	0.000378684	6157.881564	0.000343766	5894.01495	8.09E-05	465.7159965	0.932803326	67.97376705	100.8713536	8070.214061	0.953	0.021257411	5995.959077	0.00069433	5822.177654	67.88032775	300.6059811	0.910517871	0.234174312	90.74587156	6912.908945	0.872	0.000376585	6221.615367	0.000331634	5832.802054	0.000129821	866.2670872	0.916553935	69.37730193	99.03040685	7570.74818	0.934	0.021681705	5997.832548	0.000693806	5736.79941	69.26119661	452.7994647	73.3416	67.5842	65.126	34.45088837	33.98943822	36.9264177
0.899292333	0.257216015	176.3042365	6613.240922	0.8592	0.00065622	2282.723929	0.000572245	2123.088823	0.000227905	363.9036313	0.896900283	71.6770557	183.2385057	6969.91954	0.9048	0.022644529	2201.268236	0.000946686	2065.499078	71.49650688	270.2940981	0.86491876	0.513182557	162.101337	5644.432213	0.8003	0.000639912	2335.709484	0.000529691	2111.824248	0.000476286	692.357241	0.898263353	71.61682862	182.8438604	7002.593198	0.9056	0.022621108	2215.320892	0.000940635	2091.26582	71.43335607	253.6199205	48.4562	42.4781	39.31	16.27017153	15.3845936	16.30709355
0.942376701	0.129250218	126.7925022	7897.555362	0.9176	6.41E-05	18832.17807	6.11E-05	17639.20644	6.69E-06	2685.392219	0.935491606	67.60730689	131.6741127	8166.74739	0.958	0.020835036	18491.17474	0.000401629	17587.5947	67.52599574	1690.788205	0.912348763	0.260321101	118.2818807	6946.219725	0.872	6.43E-05	18819.77294	5.93E-05	17061.84537	1.39E-05	5284.286124	0.924420587	68.74408488	130.6982493	7804.538249	0.9425	0.021176391	18494.19586	0.000406107	17398.80939	68.6365046	2197.93496	138.512	133.1456	138.8602	25.24198201	25.24007529	27.37422978
0.979057243	0.034809475	102.5192585	9189.569104	0.971	0.000143978	9963.447683	0.000141093	9757.840938	4.65E-06	349.0093718	0.960834718	65.15524011	104.6720024	9053.950569	0.9933	0.02017538	9752.306755	0.000467711	9553.272778	65.12624961	304.9134199	0.962725821	0.06266456	100.4051606	8607.270669	0.9495	0.000143763	9960.649394	0.000138467	9586.548054	9.31E-06	610.9843075	0.961355627	65.09454838	104.7459264	9074.181855	0.9942	0.02015673	9762.912492	0.000466703	9575.642739	65.06729472	272.5600483	101.2348	93.965	95.0406	26.34421509	26.14432587	27.1599807
0.855543727	0.719568567	125.0980996	5362.737288	0.7788	0.003503258	2768.190164	0.002336769	2577.929696	0.010380376	421.449923	0.872056317	76.47061589	138.3979784	6159.96615	0.8508	0.026981215	2636.846262	0.002984882	2529.4676	76.04069736	233.6317583	0.841354523	0.951492537	119.2409382	4983.188699	0.7504	0.003217816	2824.418977	0.001996965	2606.044438	0.01431956	567.1613806	0.862319817	76.76466423	140.5361737	5966.247256	0.8473	0.027219869	2596.953735	0.003103202	2450.382957	76.35416736	280.7076596	41.739	37.7112	34.8098	31.24030856	29.29707826	29.81012284
0.946039299	0.112000866	122.3279948	8026.540309	0.9241	0.00025817	5563.744616	0.000241229	5294.8446	3.67E-05	535.3423872	0.937041821	67.52376981	125.0529608	8212.984987	0.9592	0.02100112	5436.425667	0.000583075	5221.684486	67.44154116	385.5836113	0.903461849	0.242024965	113.5707351	6731.253121	0.8652	0.000257637	5601.849515	0.000229612	5114.786699	7.35E-05	1154.536177	0.915779241	69.5071329	120.8131503	7543.787515	0.9323	0.021599922	5455.644213	0.000587329	5147.932939	69.38746278	591.8180843	76.7592	69.1173	64.4424	23.03878502	21.69667119	21.1732681
0.950709005	0.098603652	124.5082707	8184.03609	0.931	0.000278412	5224.784962	0.000262329	4992.257447	3.34E-05	447.0455424	0.937709093	67.44423618	126.6815578	8236.421431	0.9603	0.020996822	5109.394148	0.000601844	4909.088408	67.36428858	354.2824117	0.910946293	0.211463805	116.5978534	6946.744919	0.8758	0.000276391	5264.9372	0.000247881	4847.269629	6.89E-05	948.3496232	0.923674157	68.69356378	123.8442371	7791.136783	0.9431	0.021374383	5125.881667	0.000602977	4873.291487	68.5928625	467.9183544	74.0905	66.9461	63.1799	22.80656725	21.33082265	20.64933258
0.895767306	0.295900388	181.6733232	6496.101374	0.8513	0.000831379	2102.008223	0.000703771	1952.50057	0.000455332	361.5895689	0.88780316	72.64860022	188.4833147	6715.266293	0.893	0.023104074	2032.647144	0.001070639	1901.094615	72.44141757	263.7111982	0.86180386	0.499562117	168.8293507	5589.542975	0.7993	0.000821198	2138.692106	0.000659978	1930.658153	0.000664119	626.1616414	0.89478275	72.05887581	187.8520329	6898.641635	0.9002	0.022944243	2033.347478	0.001100414	1916.11652	71.86196412	247.1277494	46.4117	40.1565	36.8913	16.35444292	15.52525709	16.16989438
0.938924994	0.144236043	115.5135461	7778.922562	0.9117	0.000226107	6771.635845	0.000209436	6405.942305	4.35E-05	786.244598	0.930382267	68.2526338	118.4662874	7988.346397	0.9492	0.021188153	6628.436578	0.000554713	6348.551461	68.15205255	530.1519174	0.891147393	0.312810798	104.841345	6369.826427	0.8446	0.000226595	6837.396756	0.000199113	6182.551234	8.09E-05	1755.021193	0.916296322	69.51684188	115.8551813	7555.114139	0.9322	0.021570263	6642.738146	0.000556977	6287.577517	69.3949044	678.7229135	83.386	75.6408	71.2246	25.48745582	25.84106374	28.18308278
0.882855559	0.504273504	167.7242979	6055.157265	0.819	0.001996832	1898.203053	0.001379012	1751.899411	0.005863249	385.6666667	0.88004701	74.65165441	177.8414522	6426.508961	0.8704	0.02495671	1835.887753	0.001928182	1721.533264	74.32582634	244.4055607	0.855033583	0.571971617	162.7379625	5421.808667	0.7892	0.002052758	1897.21224	0.001403755	1698.168268	0.006037325	496.4508363	0.884306154	73.73100942	177.8756671	6570.76337	0.8807	0.024843807	1804.541274	0.0021092	1684.694946	73.45564903	250.9356194	42.4095	36.8363	33.3663	18.18618733	16.65663538	16.49071024
0.940258611	0.134827775	87.85095681	7828.265828	0.9145	0.00014573	11321.5322	0.00013652	10597.01969	2.19E-05	1561.12772	0.926983668	68.55242831	90.74055655	7882.072479	0.9451	0.021198035	11147.23246	0.000479478	10553.09511	68.44769528	1153.861285	0.88006944	0.349530912	78.13952369	6090.430599	0.8314	0.000143052	11523.98545	0.000123531	10239.01268	5.82E-05	3747.186914	0.920877001	69.03260175	90.30641381	7698.389516	0.9386	0.021344746	11110.14404	0.000482368	10432.35078	68.92170883	1307.111975	105.3124	97.7158	94.5844	36.6922881	37.76702305	41.18412166
0.949024406	0.111662531	99.71097206	8116.647858	0.9269	7.47E-05	17297.50664	7.17E-05	16290.95482	6.29E-06	2229.497141	0.935288119	67.62858933	103.7883471	8160.109324	0.9577	0.020851546	17032.42842	0.000411215	16203.42158	67.5471492	1547.840973	0.895851986	0.30779175	91.38735457	6493.760606	0.8509	7.39E-05	17454.7901	6.64E-05	15632.76914	2.07E-05	5563.724174	0.92304737	68.80883602	102.2262107	7766.335599	0.9416	0.021206887	16997.85174	0.000416257	15948.36638	68.70210946	2049.851742	132.6874	126.702	130.4318	28.18126472	29.01317625	33.18689423
0.938871585	0.133347931	131.7446902	7789.750383	0.9134	0.000394155	4057.957631	0.000363364	3858.608447	7.16E-05	398.0904314	0.93056644	68.13958136	135.3557379	8001.23204	0.9507	0.021322544	3949.836647	0.000711693	3787.270356	68.04454228	295.6974861	0.904009976	0.236258661	124.0258661	6747.190069	0.866	0.000395468	4059.235104	0.000351474	3718.5271	0.000112526	781.4624711	0.919974814	69.16223717	133.621411	7667.342619	0.9369	0.021629684	3948.977799	0.000710341	3747.711259	69.04680656	388.5511794	64.3788	57.5869	53.4878	23.16487234	21.52375544	20.64433218
0.836653122	1.033692722	154.316442	4866.901078	0.742	0.005144473	1741.062399	0.00337426	1617.708607	0.01904319	335.6188679	0.845558498	81.00844196	170.4574798	5441.214029	0.8055	0.029911887	1660.037741	0.004050204	1576.523077	80.32344066	191.5094972	0.805997626	1.317810575	143.0192005	4223.953432	0.6979	0.004844037	1797.222955	0.002885448	1638.535148	0.023484677	465.3127955	0.842999869	80.03942036	178.2806091	5451.931843	0.8143	0.02988485	1617.985141	0.004259632	1517.012024	79.45306096	211.1022965	33.1144	29.2304	26.1222	24.70801313	22.65412359	22.29644068
0.953169795	0.093984158	105.4410191	8265.472918	0.9342	0.000108203	12026.48566	0.000103086	11452.92917	9.86E-06	1202.987262	0.944213245	66.70863383	108.9870183	8465.933649	0.9706	0.020608899	11784.2382	0.000439217	11349.47926	66.64939828	769.1143623	0.939438955	0.124358554	103.5323725	7818.458893	0.9159	0.000108311	12003.18572	0.000101819	11248.16745	1.32E-05	1600.475161	0.942761169	66.93033592	108.8662532	8409.346667	0.9675	0.02067494	11738.81354	0.000440703	11253.09472	66.8629522	912.5326098	108.5778	104.3024	109.6666	27.30724349	27.55282843	29.94181097
0.925137343	0.197977528	80.57438202	7332.715056	0.89	0.000517898	5680.365281	0.000450748	5322.988999	0.000190673	895.4480899	0.902202314	71.11471814	82.89844264	7122.720114	0.9118	0.02232598	5615.839987	0.000790697	5274.330929	70.94765658	592.6045185	0.890934187	0.358931553	75.737658	6326.024803	0.8386	0.00049109	5806.949678	0.000401194	5288.133684	0.000416171	1260.440854	0.920337531	69.195622	85.09524826	7672.967966	0.9365	0.021772291	5522.040043	0.000822728	5236.9676	69.07635444	546.7397758	71.6928	64.687	64.2176	32.72456001	33.10965465	36.15933697
0.962843416	0.066610455	104.7107926	8605.370995	0.9488	0.000175196	9978.062395	0.000165374	9667.628325	2.08E-05	509.6674747	0.952691581	65.89108306	107.599145	8762.665106	0.9824	0.020430584	9738.752647	0.000500121	9505.590846	65.84885073	350.4044178	0.951535601	0.089098308	102.9869351	8222.330049	0.9338	0.000176795	9956.981795	0.00016575	9520.00212	2.20E-05	753.6010923	0.949954604	66.18801759	106.8654534	8662.985891	0.9781	0.020520716	9715.281669	0.000502827	9439.673233	66.13834028	447.7236479	97.9374	93.004	96.9806	29.07945462	29.28430952	31.97375836
0.967975369	0.054701391	102.2670223	8788.299864	0.9561	0.000123118	12321.68779	0.000118493	11957.87958	8.24E-06	625.9892271	0.957080383	65.49053931	105.7582718	8918.769301	0.9883	0.020256052	12082.40787	0.000447656	11830.65606	65.45573782	365.2717798	0.953183587	0.082870568	100.6317813	8280.294746	0.9364	0.000122821	12294.45056	0.000116238	11726.18774	1.25E-05	986.2273601	0.953235695	65.88631043	104.8811196	8777.966514	0.9825	0.020376053	12019.83644	0.000451025	11680.42229	65.84214277	554.1434097	108.6768	104.0118	109.0862	31.97867636	32.18670938	34.543821
0.964406161	0.064492372	78.92319832	8658.1495	0.9505	0.000130193	12783.99905	0.000124913	12359.75847	9.76E-06	746.0620726	0.952260736	65.91832994	82.49633401	8748.035234	0.982	0.020392707	12521.17291	0.000456922	12196.10799	65.87566827	482.6522403	0.949007885	0.098891639	77.04949962	8131.995158	0.9293	0.000131351	12728.46734	0.000124927	12073.11853	1.31E-05	1261.601851	0.949950075	66.16659853	82.11856092	8664.436018	0.9784	0.02046683	12507.85333	0.000457043	12148.10338	66.1180573	579.4948896	111.4936	105.088	107.7988	34.43240565	34.60454675	37.82960109
0.964543592	0.064380391	87.59457185	8662.654955	0.9506	0.000152575	10373.31454	0.000146715	10022.7414	1.07E-05	618.3939617	0.953019287	65.85025432	91.017294	8774.479756	0.983	0.020393758	10173.75229	0.000477764	9919.30561	65.80865405	379.4132248	0.951010979	0.094088617	85.50981654	8198.915889	0.9321	0.000153792	10351.08486	0.000146791	9844.441384	1.41E-05	947.7542109	0.952093566	65.96046464	90.97371103	8739.97636	0.9814	0.020426338	10157.09874	0.000477397	9881.881143	65.91594424	427.7409823	101.8872	94.8084	96.049	30.18031935	30.04205868	32.69149429
0.96721079	0.056026809	84.29060635	8761.099906	0.9549	0.000136771	11833.30338	0.000132034	11451.34058	8.10E-06	640.5310504	0.956851464	65.48280049	87.9267503	8912.694051	0.9884	0.020267703	11599.59278	0.00046162	11334.29747	65.44911445	379.5696074	0.95572224	0.076710288	82.70209597	8366.707628	0.9399	0.000137852	11783.782	0.000132273	11233.38855	9.54E-06	952.4181296	0.954628357	65.71431472	87.46517766	8830.804467	0.985	0.020337079	11581	0.000462267	11279.21555	65.67503108	468.4937056	108.2913	101.7205	103.8216	31.62524378	31.6179566	34.45629947
0.966767693	0.059218111	100.8618593	8742.578661	0.9541	0.000149672	10884.21549	0.000143395	10564.6387	1.22E-05	548.488628	0.95473411	65.71431472	103.9764467	8834.225787	0.985	0.020349569	10667.5603	0.000473155	10436.60625	65.67503379	346.3639594	0.952318938	0.090227978	99.30546934	8244.675051	0.9343	0.000147982	10880.67462	0.000138693	10396.75935	2.08E-05	859.1147383	0.952888457	65.94163186	103.3608027	8764.172456	0.9817	0.020418709	10625.48284	0.000476052	10346.05959	65.89580081	464.6178058	102.3768	97.221	101.435	30.80637307	30.90216755	33.87507897
0.927576707	0.190737219	94.34444569	7408.872021	0.8939	0.00118344	4940.475668	0.000997519	4766.023462	0.000657182	292.4583287	0.920958054	69.15345214	100.7411162	7689.792231	0.9371	0.022433772	4735.449258	0.001385128	4583.702893	69.03238561	248.0183545	0.906426575	0.319193567	90.35601911	6740.106631	0.8581	0.001098499	5018.428621	0.000869708	4760.248799	0.001267317	508.8079478	0.91550691	70.02646074	98.56345178	7495.43158	0.9259	0.02263758	4831.207582	0.001318907	4702.357575	69.86769001	197.8241711	66.374	55.2767	53.8319	37.26358174	33.91760512	34.16402263
0.957160425	0.078443878	96.12244898	8408.88244	0.9408	0.000191274	8175.720451	0.000180111	7873.617145	2.30E-05	514.0706845	0.940126186	67.07416615	98.46219184	8329.031697	0.9654	0.020801476	8017.597058	0.000516811	7752.37553	67.00840815	418.190491	0.938922168	0.133698031	92.91028446	7793.571554	0.914	0.000191896	8223.881072	0.000177734	7796.582465	3.47E-05	833.9269147	0.945034966	66.66803954	98.71581549	8491.186779	0.9712	0.020680396	7971.322694	0.000518837	7717.592553	66.6082299	444.8946664	89.9255	83.6235	85.7329	26.30497576	27.18364118	30.319089
0.848992558	0.500506329	115.6144304	5339.093671	0.79	0.002828916	3075.55481	0.002087931	2745.082338	0.003270255	733.2086076	0.857931606	76.301468	128.535643	5920.182149	0.8515	0.026276001	2896.140223	0.002703127	2616.144883	75.97386027	604.8409865	0.844244528	0.577826254	111.7560631	5204.04735	0.7793	0.002727398	3120.277557	0.001935244	2793.271676	0.004009324	762.167073	0.864129418	75.60388779	127.2016063	6072.191479	0.8591	0.026058407	2958.281457	0.00268416	2736.39381	75.3015381	472.4054243	47.1081	42.8943	32.2562	33.77072422	31.28557379	25.72316002
0.787435727	0.822614544	355.0510018	4108.345383	0.7137	0.007973299	303.0288637	0.005751719	262.2437992	0.009248855	120.7755359	0.801629851	82.99846997	385.7048323	4697.506184	0.7843	0.033351397	287.1759531	0.006586027	254.8212816	82.48678151	78.75111564	0.747013033	1.256004865	323.9136516	3400.654606	0.6578	0.007916172	307.7512922	0.005405695	254.8441526	0.014022482	191.0197628	0.789732618	84.80239521	378.2311898	4458.033325	0.7682	0.033897762	287.8043478	0.006545406	251.820792	84.21618732	91.63043478	15.4796	14.1722	9.7183	9.434446663	8.45074832	5.784422625
0.853094287	0.468808836	107.6401406	5441.305008	0.7967	0.002430702	3493.738044	0.001796061	3105.792098	0.002699915	870.1104556	0.859946583	75.95767072	118.5023386	5976.64102	0.8552	0.025755573	3328.77362	0.002362253	3010.936869	75.64486875	677.4397802	0.84795891	0.539381601	104.8681766	5298.34979	0.7859	0.002336821	3538.535946	0.001661437	3152.368854	0.00335316	922.1813208	0.869386032	75.03073368	118.0752166	6203.525014	0.8655	0.025463895	3368.032351	0.002352705	3104.317449	74.74448623	556.9149624	51.5901	47.0227	35.4552	34.70759113	32.23504281	26.48072871
0.83851994	0.544094894	195.8370294	5102.013409	0.7756	0.00469047	886.656524	0.003444009	780.5783342	0.00513747	269.4573234	0.845827047	77.62517917	208.3741042	5637.32107	0.8372	0.028492207	854.4899666	0.004067838	772.7147377	77.27274091	175.9647635	0.813037025	0.807991272	183.9144961	4515.505114	0.7333	0.004549435	899.1429156	0.003199992	771.2358862	0.00792124	387.703532	0.836645797	78.47886984	207.3974885	5441.696209	0.8282	0.02880447	853.2301376	0.004129612	761.4925232	78.11247028	183.2193915	28.1275	24.8371	16.9885	15.91845607	13.79674467	9.871310336
0.872921297	0.364959961	114.2176656	5924.662461	0.8242	0.001456729	3562.667435	0.00113728	3193.555452	0.001344346	820.4033002	0.884171153	73.06418196	121.5954284	6614.162707	0.8881	0.023860338	3444.276771	0.001566587	3180.593468	72.84176299	516.9601396	0.870923713	0.368472307	113.6198418	5875.205234	0.8215	0.001444866	3565.244553	0.001098402	3195.351729	0.001240542	873.7245283	0.88024115	73.24700835	120.6915782	6525.616166	0.8858	0.023977959	3434.420185	0.001640434	3153.281111	73.03064726	528.6688869	56.2582	51.3474	39.4601	29.32114481	27.13742274	23.8260993
0.897123846	0.244092655	154.652427	6572.714119	0.8591	0.00063617	2585.11384	0.000554786	2370.141315	0.0002073	451.8467	0.903296524	70.73071468	163.0752864	7174.047245	0.9165	0.022344672	2505.634479	0.000929135	2352.09744	70.58375228	285.2331697	0.893039231	0.298125663	152.2658258	6426.93988	0.8483	0.000637867	2585.012731	0.000557043	2352.077824	0.000253692	541.1843687	0.899161384	71.0681868	162.1359351	7061.145801	0.9122	0.022446442	2505.01162	0.000927563	2341.153943	70.91647973	298.5566762	52.0112	46.433	32.6229	19.20804192	18.18592618	15.08638776
0.88076986	0.309173544	182.1627796	6133.465255	0.8361	0.000809156	1942.060878	0.000689237	1756.907707	0.000342841	416.0190169	0.88736565	72.31712756	190.5417038	6729.958742	0.8968	0.022993873	1881.243756	0.001076311	1747.680962	72.13433495	258.6545495	0.872937087	0.398852399	177.5134904	5892.606153	0.8191	0.000804714	1951.797949	0.000679865	1751.669463	0.000460878	516.0313759	0.882604666	72.81477324	189.2658285	6601.675797	0.8908	0.023137961	1890.706668	0.001068321	1751.773284	72.62022162	255.7459587	45.0524	40.1475	28.1687	15.79906498	15.62040152	13.58047276
0.801075193	0.737642065	248.5842804	4356.992058	0.7303	0.005840231	536.3394495	0.004221322	464.0304376	0.007013593	197.4131179	0.814168732	81.25930552	270.0527105	4957.257057	0.8006	0.030751947	509.8172621	0.004974765	452.8683958	80.80595551	129.8725956	0.772256721	1.01826087	230.6127536	3815.510435	0.69	0.005750181	546.1015942	0.003983275	460.3245143	0.009813145	267.9771014	0.811600544	81.93717739	266.7605439	4885.468589	0.7943	0.030915841	513.149188	0.004938921	455.7719031	81.44728657	133.9160267	20.7984	18.8169	12.5469	12.87347496	11.41016102	7.885505716
[truncated: 522 more rows]
[truncated: 29 more columns]
